# Supplementary material for: Circular RNA-Expression Profiling Reveals a Potential Role of Hsa_circ_0097435 in Heart Failure via Sponging Multiple MicroRNAs
Source: Front Genet. 2020 Mar 10;11:212. doi: 10.3389/fgene.2020.00212 (PMC7076158; doi:10.3389/fgene.2020.00212)
Supplement: Supplementary file 4 [file Table_2.XLS]

## Sheet: T01.find_circ_Predict
#chrom	start	end	name	n_reads	strand	n_uniq	uniq_bridges	best_qual_left	best_qual_right	tissues	tiss_counts	edits	anchor_overlap	breakpoints	signal	strandmatch	category
18	62072672	62102902	5circ_000001	3	-	2	3	5	40	T01	3	0	0	1	GTAG	NA	ANCHOR_UNIQUE,CANONICAL,CIRCULAR,PERFECT_EXT,UNAMBIGUOUS_BP
1	10132368	10137205	5circ_000003	2	+	2	2	40	40	T01	2	0	0	1	GTAG	NA	ANCHOR_UNIQUE,CANONICAL,CIRCULAR,PERFECT_EXT,UNAMBIGUOUS_BP
1	23030468	23059167	5circ_000006	8	+	7	8	40	40	T01	8	0	0	1	GTAG	NA	ANCHOR_UNIQUE,CANONICAL,CIRCULAR,PERFECT_EXT,UNAMBIGUOUS_BP
7	143291539	143292698	5circ_000007	2	+	2	2	40	40	T01	2	0	0	1	GTAG	NA	ANCHOR_UNIQUE,CANONICAL,CIRCULAR,PERFECT_EXT,UNAMBIGUOUS_BP
3	152414940	152432920	5circ_000008	59	+	22	55	40	40	T01	59	0	0	1	GTAG	NA	ANCHOR_UNIQUE,CANONICAL,CIRCULAR,PERFECT_EXT,UNAMBIGUOUS_BP
8	41661800	41663742	5circ_000010	5	-	1	5	40	35	T01	5	0	0	1	GTAG	NA	ANCHOR_UNIQUE,CANONICAL,CIRCULAR,PERFECT_EXT,UNAMBIGUOUS_BP
21	45128401	45134832	5circ_000011	3	+	2	3	5	40	T01	3	0	0	1	GTAG	NA	ANCHOR_UNIQUE,CANONICAL,CIRCULAR,PERFECT_EXT,UNAMBIGUOUS_BP
15	65700543	65701890	5circ_000012	15	-	8	14	40	40	T01	15	0	0	1	GTAG	NA	ANCHOR_UNIQUE,CANONICAL,CIRCULAR,PERFECT_EXT,UNAMBIGUOUS_BP
10	94441895	94474783	5circ_000014	5	+	3	5	40	40	T01	5	0	0	1	GTAG	NA	ANCHOR_UNIQUE,CANONICAL,CIRCULAR,PERFECT_EXT,UNAMBIGUOUS_BP
10	27566831	27578713	5circ_000018	6	+	2	6	40	40	T01	6	1	0	1	GTAG	NA	ANCHOR_UNIQUE,CANONICAL,CIRCULAR,GOOD_EXT,UNAMBIGUOUS_BP
12	116230532	116237705	5circ_000019	126	-	47	119	40	40	T01	126	0	0	1	GTAG	NA	ANCHOR_UNIQUE,CANONICAL,CIRCULAR,PERFECT_EXT,UNAMBIGUOUS_BP
10	46010222	46010404	5circ_000020	2	-	1	2	5	5	T01	2	0	2	1	GTAG	NA	ANCHOR_UNIQUE,CANONICAL,CIRCULAR,OK_EXT,UNAMBIGUOUS_BP
X	101145063	101161569	5circ_000021	2	+	1	2	35	5	T01	2	0	0	1	GTAG	NA	ANCHOR_UNIQUE,CANONICAL,CIRCULAR,PERFECT_EXT,UNAMBIGUOUS_BP
22	39086455	39086986	5circ_000022	9	-	2	6	5	40	T01	9	1	0	1	GTAG	NA	ANCHOR_UNIQUE,CANONICAL,CIRCULAR,GOOD_EXT,UNAMBIGUOUS_BP
13	102633949	102644673	5circ_000024	2	+	1	2	5	40	T01	2	0	0	1	GTAG	NA	ANCHOR_UNIQUE,CANONICAL,CIRCULAR,PERFECT_EXT,UNAMBIGUOUS_BP
1	20757165	20776750	5circ_000026	2	-	1	2	40	40	T01	2	0	0	1	GTAG	NA	ANCHOR_UNIQUE,CANONICAL,CIRCULAR,PERFECT_EXT,UNAMBIGUOUS_BP
2	71075554	71076701	5circ_000027	2	+	2	2	40	40	T01	2	0	0	1	GTAG	NA	ANCHOR_UNIQUE,CANONICAL,CIRCULAR,PERFECT_EXT,UNAMBIGUOUS_BP
16	15031906	15032860	5circ_000028	2	+	1	2	40	40	T01	2	0	0	1	GTAG	NA	ANCHOR_UNIQUE,CANONICAL,CIRCULAR,PERFECT_EXT,UNAMBIGUOUS_BP
1	75803730	75816546	5circ_000031	2	+	1	2	40	40	T01	2	1	0	1	GTAG	NA	ANCHOR_UNIQUE,CANONICAL,CIRCULAR,GOOD_EXT,UNAMBIGUOUS_BP
11	62839113	62839867	5circ_000032	11	-	3	11	40	40	T01	11	0	0	1	GTAG	NA	ANCHOR_UNIQUE,CANONICAL,CIRCULAR,PERFECT_EXT,UNAMBIGUOUS_BP
3	196058283	196072152	5circ_000034	4	-	1	4	5	35	T01	4	1	0	1	GTAG	NA	ANCHOR_UNIQUE,CANONICAL,CIRCULAR,GOOD_EXT,UNAMBIGUOUS_BP
7	130120748	130122202	5circ_000035	10	+	7	10	40	40	T01	10	0	0	1	GTAG	NA	ANCHOR_UNIQUE,CANONICAL,CIRCULAR,PERFECT_EXT,UNAMBIGUOUS_BP
6	43047124	43048143	5circ_000036	5	+	2	3	40	40	T01	5	2	0	1	GTAG	NA	ANCHOR_UNIQUE,CANONICAL,CIRCULAR,OK_EXT,UNAMBIGUOUS_BP
1	151097851	151107222	5circ_000037	3	+	1	3	40	40	T01	3	0	0	1	GTAG	NA	ANCHOR_UNIQUE,CANONICAL,CIRCULAR,PERFECT_EXT,UNAMBIGUOUS_BP
1	86738660	86742436	5circ_000038	2	+	1	2	40	40	T01	2	0	0	1	GTAG	NA	ANCHOR_UNIQUE,CANONICAL,CIRCULAR,PERFECT_EXT,UNAMBIGUOUS_BP
6	7891620	7904723	5circ_000039	6	-	1	6	40	40	T01	6	0	0	1	GTAG	NA	ANCHOR_UNIQUE,CANONICAL,CIRCULAR,PERFECT_EXT,UNAMBIGUOUS_BP
7	139258487	139261741	5circ_000040	6	+	2	6	40	40	T01	6	0	0	1	GTAG	NA	ANCHOR_UNIQUE,CANONICAL,CIRCULAR,PERFECT_EXT,UNAMBIGUOUS_BP
12	1754257	1772961	5circ_000041	3	+	3	3	40	40	T01	3	0	0	1	GTAG	NA	ANCHOR_UNIQUE,CANONICAL,CIRCULAR,PERFECT_EXT,UNAMBIGUOUS_BP
16	1614638	1637907	5circ_000042	3	+	1	3	40	40	T01	3	0	0	1	GTAG	NA	ANCHOR_UNIQUE,CANONICAL,CIRCULAR,PERFECT_EXT,UNAMBIGUOUS_BP
2	63856305	63862928	5circ_000047	2	+	1	2	40	5	T01	2	0	0	1	GTAG	NA	ANCHOR_UNIQUE,CANONICAL,CIRCULAR,PERFECT_EXT,UNAMBIGUOUS_BP
12	46239678	46243314	5circ_000048	12	-	6	11	40	40	T01	12	0	0	1	GTAG	NA	ANCHOR_UNIQUE,CANONICAL,CIRCULAR,PERFECT_EXT,UNAMBIGUOUS_BP
13	77205255	77243951	5circ_000049	4	-	1	4	5	40	T01	4	0	0	1	GTAG	NA	ANCHOR_UNIQUE,CANONICAL,CIRCULAR,PERFECT_EXT,UNAMBIGUOUS_BP
X	132378977	132379663	5circ_000050	4	+	1	4	40	40	T01	4	1	0	1	GTAG	NA	ANCHOR_UNIQUE,CANONICAL,CIRCULAR,GOOD_EXT,UNAMBIGUOUS_BP
19	15436805	15448367	5circ_000051	2	-	2	2	37	40	T01	2	1	0	1	GTAG	NA	ANCHOR_UNIQUE,CANONICAL,CIRCULAR,GOOD_EXT,UNAMBIGUOUS_BP
8	17195522	17221975	5circ_000052	2	+	1	2	5	35	T01	2	0	0	1	GTAG	NA	ANCHOR_UNIQUE,CANONICAL,CIRCULAR,PERFECT_EXT,UNAMBIGUOUS_BP
1	202150310	202152699	5circ_000053	3	-	1	3	40	5	T01	3	0	0	1	GTAG	NA	ANCHOR_UNIQUE,CANONICAL,CIRCULAR,PERFECT_EXT,UNAMBIGUOUS_BP
13	95210691	95234834	5circ_000054	5	-	1	5	35	40	T01	5	0	2	1	GTAG	NA	ANCHOR_UNIQUE,CANONICAL,CIRCULAR,OK_EXT,UNAMBIGUOUS_BP
16	71667177	71681905	5circ_000055	13	-	7	13	40	40	T01	13	0	0	1	GTAG	NA	ANCHOR_UNIQUE,CANONICAL,CIRCULAR,PERFECT_EXT,UNAMBIGUOUS_BP
20	34585436	34588607	5circ_000056	4	-	3	4	40	40	T01	4	0	0	1	GTAG	NA	ANCHOR_UNIQUE,CANONICAL,CIRCULAR,PERFECT_EXT,UNAMBIGUOUS_BP
5	14304460	14336727	5circ_000057	6	+	3	6	40	40	T01	6	0	0	1	GTAG	NA	ANCHOR_UNIQUE,CANONICAL,CIRCULAR,PERFECT_EXT,UNAMBIGUOUS_BP
19	10904950	10909207	5circ_000058	117	+	43	111	40	40	T01	117	0	0	1	GTAG	NA	ANCHOR_UNIQUE,CANONICAL,CIRCULAR,PERFECT_EXT,UNAMBIGUOUS_BP
6	116645713	116660846	5circ_000059	5	-	4	5	40	40	T01	5	0	0	1	GTAG	NA	ANCHOR_UNIQUE,CANONICAL,CIRCULAR,PERFECT_EXT,UNAMBIGUOUS_BP
1	10117458	10171329	5circ_000060	2	+	2	2	37	40	T01	2	0	0	1	GTAG	NA	ANCHOR_UNIQUE,CANONICAL,CIRCULAR,PERFECT_EXT,UNAMBIGUOUS_BP
2	177232391	177234271	5circ_000061	3	-	3	3	40	40	T01	3	0	0	1	GTAG	NA	ANCHOR_UNIQUE,CANONICAL,CIRCULAR,PERFECT_EXT,UNAMBIGUOUS_BP
11	224077	233215	5circ_000062	4	-	2	4	40	40	T01	4	0	0	1	GTAG	NA	ANCHOR_UNIQUE,CANONICAL,CIRCULAR,PERFECT_EXT,UNAMBIGUOUS_BP
1	40190771	40202614	5circ_000065	9	+	5	6	40	5	T01	9	0	0	1	GTAG	NA	ANCHOR_UNIQUE,CANONICAL,CIRCULAR,PERFECT_EXT,UNAMBIGUOUS_BP
5	79619611	79623489	5circ_000066	7	+	3	7	40	40	T01	7	0	0	1	GTAG	NA	ANCHOR_UNIQUE,CANONICAL,CIRCULAR,PERFECT_EXT,UNAMBIGUOUS_BP
3	20125904	20137052	5circ_000067	2	+	1	2	40	40	T01	2	0	0	1	GTAG	NA	ANCHOR_UNIQUE,CANONICAL,CIRCULAR,PERFECT_EXT,UNAMBIGUOUS_BP
4	143437998	143440382	5circ_000068	22	+	16	22	40	40	T01	22	0	0	1	GTAG	NA	ANCHOR_UNIQUE,CANONICAL,CIRCULAR,PERFECT_EXT,UNAMBIGUOUS_BP
16	21797749	21800837	5circ_000072	2	-	1	2	5	5	T01	2	0	0	1	GTAG	NA	ANCHOR_UNIQUE,CANONICAL,CIRCULAR,PERFECT_EXT,UNAMBIGUOUS_BP
19	2072659	2073424	5circ_000073	4	-	1	4	5	40	T01	4	0	0	1	GTAG	NA	ANCHOR_UNIQUE,CANONICAL,CIRCULAR,PERFECT_EXT,UNAMBIGUOUS_BP
5	72855773	72875737	5circ_000075	2	+	1	2	40	5	T01	2	0	0	1	GTAG	NA	ANCHOR_UNIQUE,CANONICAL,CIRCULAR,PERFECT_EXT,UNAMBIGUOUS_BP
11	68569747	68596218	5circ_000076	7	+	2	7	5	40	T01	7	0	0	1	GTAG	NA	ANCHOR_UNIQUE,CANONICAL,CIRCULAR,PERFECT_EXT,UNAMBIGUOUS_BP
20	63928334	63931022	5circ_000077	54	+	23	49	40	40	T01	54	0	0	1	GTAG	NA	ANCHOR_UNIQUE,CANONICAL,CIRCULAR,PERFECT_EXT,UNAMBIGUOUS_BP
13	20731840	20732121	5circ_000078	6	-	6	6	40	40	T01	6	0	0	1	GTAG	NA	ANCHOR_UNIQUE,CANONICAL,CIRCULAR,PERFECT_EXT,UNAMBIGUOUS_BP
21	44856192	44861271	5circ_000081	4	-	2	4	40	40	T01	4	0	0	1	GTAG	NA	ANCHOR_UNIQUE,CANONICAL,CIRCULAR,PERFECT_EXT,UNAMBIGUOUS_BP
5	154911726	154913038	5circ_000082	4	-	2	4	40	40	T01	4	0	0	1	GTAG	NA	ANCHOR_UNIQUE,CANONICAL,CIRCULAR,PERFECT_EXT,UNAMBIGUOUS_BP
17	64369749	64378117	5circ_000083	4	-	1	4	40	40	T01	4	0	0	1	GTAG	NA	ANCHOR_UNIQUE,CANONICAL,CIRCULAR,PERFECT_EXT,UNAMBIGUOUS_BP
3	52344489	52352707	5circ_000084	2	+	1	2	5	40	T01	2	0	0	1	GTAG	NA	ANCHOR_UNIQUE,CANONICAL,CIRCULAR,PERFECT_EXT,UNAMBIGUOUS_BP
4	39913610	39928164	5circ_000085	7	-	2	4	40	40	T01	7	0	0	1	GTAG	NA	ANCHOR_UNIQUE,CANONICAL,CIRCULAR,PERFECT_EXT,UNAMBIGUOUS_BP
1	43653136	43660412	5circ_000086	5	+	1	5	40	40	T01	5	0	0	1	GTAG	NA	ANCHOR_UNIQUE,CANONICAL,CIRCULAR,PERFECT_EXT,UNAMBIGUOUS_BP
20	50127974	50130947	5circ_000088	16	-	8	16	40	40	T01	16	0	0	1	GTAG	NA	ANCHOR_UNIQUE,CANONICAL,CIRCULAR,PERFECT_EXT,UNAMBIGUOUS_BP
16	88027482	88038011	5circ_000089	28	+	11	18	40	5	T01	28	1	0	1	GTAG	NA	ANCHOR_UNIQUE,CANONICAL,CIRCULAR,GOOD_EXT,UNAMBIGUOUS_BP
8	125049005	125057666	5circ_000090	2	-	1	2	5	40	T01	2	0	0	1	GTAG	NA	ANCHOR_UNIQUE,CANONICAL,CIRCULAR,PERFECT_EXT,UNAMBIGUOUS_BP
8	21974669	21985691	5circ_000092	26	+	15	26	40	40	T01	26	0	0	1	GTAG	NA	ANCHOR_UNIQUE,CANONICAL,CIRCULAR,PERFECT_EXT,UNAMBIGUOUS_BP
12	132657135	132659509	5circ_000093	3	-	1	3	5	40	T01	3	1	0	1	GTAG	NA	ANCHOR_UNIQUE,CANONICAL,CIRCULAR,GOOD_EXT,UNAMBIGUOUS_BP
12	6509716	6511252	5circ_000095	7	+	5	7	40	40	T01	7	0	0	1	GTAG	NA	ANCHOR_UNIQUE,CANONICAL,CIRCULAR,PERFECT_EXT,UNAMBIGUOUS_BP
3	45709497	45735373	5circ_000096	4	+	3	4	40	40	T01	4	0	0	1	GTAG	NA	ANCHOR_UNIQUE,CANONICAL,CIRCULAR,PERFECT_EXT,UNAMBIGUOUS_BP
1	26729650	26732792	5circ_000097	3	+	1	3	40	5	T01	3	0	0	1	GTAG	NA	ANCHOR_UNIQUE,CANONICAL,CIRCULAR,PERFECT_EXT,UNAMBIGUOUS_BP
5	131395562	131408207	5circ_000098	5	-	3	5	40	40	T01	5	0	0	1	GTAG	NA	ANCHOR_UNIQUE,CANONICAL,CIRCULAR,PERFECT_EXT,UNAMBIGUOUS_BP
6	149578821	149582603	5circ_000099	2	+	1	2	5	40	T01	2	1	0	1	GTAG	NA	ANCHOR_UNIQUE,CANONICAL,CIRCULAR,GOOD_EXT,UNAMBIGUOUS_BP
4	39913610	39925933	5circ_000100	79	-	30	75	40	40	T01	79	0	0	1	GTAG	NA	ANCHOR_UNIQUE,CANONICAL,CIRCULAR,PERFECT_EXT,UNAMBIGUOUS_BP
11	111836164	111857737	5circ_000101	6	-	3	6	40	40	T01	6	0	0	1	GTAG	NA	ANCHOR_UNIQUE,CANONICAL,CIRCULAR,PERFECT_EXT,UNAMBIGUOUS_BP
19	15267415	15273133	5circ_000102	8	-	4	8	40	40	T01	8	0	0	1	GTAG	NA	ANCHOR_UNIQUE,CANONICAL,CIRCULAR,PERFECT_EXT,UNAMBIGUOUS_BP
9	97994630	98012472	5circ_000103	2	+	1	2	5	5	T01	2	0	0	1	GTAG	NA	ANCHOR_UNIQUE,CANONICAL,CIRCULAR,PERFECT_EXT,UNAMBIGUOUS_BP
21	39269898	39280248	5circ_000104	2	-	2	2	5	40	T01	2	0	0	1	GTAG	NA	ANCHOR_UNIQUE,CANONICAL,CIRCULAR,PERFECT_EXT,UNAMBIGUOUS_BP
17	1576596	1591699	5circ_000105	2	-	1	2	40	40	T01	2	0	0	1	GTAG	NA	ANCHOR_UNIQUE,CANONICAL,CIRCULAR,PERFECT_EXT,UNAMBIGUOUS_BP
1	117626095	117626543	5circ_000106	4	-	2	4	35	40	T01	4	2	0	1	GTAG	NA	ANCHOR_UNIQUE,CANONICAL,CIRCULAR,OK_EXT,UNAMBIGUOUS_BP
10	119898426	119912164	5circ_000107	2	+	1	2	40	40	T01	2	0	0	1	GTAG	NA	ANCHOR_UNIQUE,CANONICAL,CIRCULAR,PERFECT_EXT,UNAMBIGUOUS_BP
17	1100636	1125367	5circ_000108	2	-	1	2	40	5	T01	2	0	0	1	GTAG	NA	ANCHOR_UNIQUE,CANONICAL,CIRCULAR,PERFECT_EXT,UNAMBIGUOUS_BP
1	29015691	29039426	5circ_000111	2	+	1	2	5	5	T01	2	0	0	1	GTAG	NA	ANCHOR_UNIQUE,CANONICAL,CIRCULAR,PERFECT_EXT,UNAMBIGUOUS_BP
10	4830674	4847299	5circ_000112	10	+	5	10	40	40	T01	10	0	0	1	GTAG	NA	ANCHOR_UNIQUE,CANONICAL,CIRCULAR,PERFECT_EXT,UNAMBIGUOUS_BP
14	60114699	60116060	5circ_000113	4	+	1	4	40	5	T01	4	0	0	1	GTAG	NA	ANCHOR_UNIQUE,CANONICAL,CIRCULAR,PERFECT_EXT,UNAMBIGUOUS_BP
12	19473247	19500221	5circ_000114	2	+	2	2	40	5	T01	2	0	0	1	GTAG	NA	ANCHOR_UNIQUE,CANONICAL,CIRCULAR,PERFECT_EXT,UNAMBIGUOUS_BP
2	61493893	61497007	5circ_000115	6	-	1	6	40	40	T01	6	0	0	1	GTAG	NA	ANCHOR_UNIQUE,CANONICAL,CIRCULAR,PERFECT_EXT,UNAMBIGUOUS_BP
19	17567405	17568713	5circ_000116	3	+	3	3	40	40	T01	3	0	0	1	GTAG	NA	ANCHOR_UNIQUE,CANONICAL,CIRCULAR,PERFECT_EXT,UNAMBIGUOUS_BP
22	41135812	41141222	5circ_000117	2	+	1	2	40	5	T01	2	0	0	1	GTAG	NA	ANCHOR_UNIQUE,CANONICAL,CIRCULAR,PERFECT_EXT,UNAMBIGUOUS_BP
11	16111802	16186955	5circ_000119	190	-	64	188	40	40	T01	190	0	0	1	GTAG	NA	ANCHOR_UNIQUE,CANONICAL,CIRCULAR,PERFECT_EXT,UNAMBIGUOUS_BP
4	876529	894009	5circ_000120	3	-	1	3	40	40	T01	3	0	0	1	GTAG	NA	ANCHOR_UNIQUE,CANONICAL,CIRCULAR,PERFECT_EXT,UNAMBIGUOUS_BP
16	27434346	27437687	5circ_000121	22	+	12	22	40	40	T01	22	0	0	1	GTAG	NA	ANCHOR_UNIQUE,CANONICAL,CIRCULAR,PERFECT_EXT,UNAMBIGUOUS_BP
19	11513055	11514221	5circ_000123	23	-	12	23	40	40	T01	23	0	0	1	GTAG	NA	ANCHOR_UNIQUE,CANONICAL,CIRCULAR,PERFECT_EXT,UNAMBIGUOUS_BP
1	28987430	28987905	5circ_000124	20	+	10	20	40	40	T01	20	0	0	1	GTAG	NA	ANCHOR_UNIQUE,CANONICAL,CIRCULAR,PERFECT_EXT,UNAMBIGUOUS_BP
5	37153739	37162566	5circ_000125	2	-	2	2	40	40	T01	2	0	0	1	GTAG	NA	ANCHOR_UNIQUE,CANONICAL,CIRCULAR,PERFECT_EXT,UNAMBIGUOUS_BP
16	8858349	8859335	5circ_000126	127	-	54	120	40	40	T01	127	0	0	1	GTAG	NA	ANCHOR_UNIQUE,CANONICAL,CIRCULAR,PERFECT_EXT,UNAMBIGUOUS_BP
13	32732100	32735330	5circ_000127	13	+	7	13	40	40	T01	13	0	0	1	GTAG	NA	ANCHOR_UNIQUE,CANONICAL,CIRCULAR,PERFECT_EXT,UNAMBIGUOUS_BP
4	127886382	127896907	5circ_000128	2	+	1	2	5	5	T01	2	0	0	1	GTAG	NA	ANCHOR_UNIQUE,CANONICAL,CIRCULAR,PERFECT_EXT,UNAMBIGUOUS_BP
5	133959493	133960020	5circ_000129	3	-	2	2	5	5	T01	3	0	0	1	GTAG	NA	ANCHOR_UNIQUE,CANONICAL,CIRCULAR,PERFECT_EXT,UNAMBIGUOUS_BP
6	53514203	53523323	5circ_000130	4	-	2	4	40	40	T01	4	0	0	1	GTAG	NA	ANCHOR_UNIQUE,CANONICAL,CIRCULAR,PERFECT_EXT,UNAMBIGUOUS_BP
3	18378169	18417078	5circ_000132	2	-	1	2	5	5	T01	2	0	0	1	GTAG	NA	ANCHOR_UNIQUE,CANONICAL,CIRCULAR,PERFECT_EXT,UNAMBIGUOUS_BP
15	65702304	65703008	5circ_000133	23	-	14	18	40	40	T01	23	0	0	1	GTAG	NA	ANCHOR_UNIQUE,CANONICAL,CIRCULAR,PERFECT_EXT,UNAMBIGUOUS_BP
3	183775914	183798051	5circ_000134	4	+	1	4	5	40	T01	4	0	0	1	GTAG	NA	ANCHOR_UNIQUE,CANONICAL,CIRCULAR,PERFECT_EXT,UNAMBIGUOUS_BP
20	2947981	2965202	5circ_000135	23	+	9	23	40	40	T01	23	0	0	1	GTAG	NA	ANCHOR_UNIQUE,CANONICAL,CIRCULAR,PERFECT_EXT,UNAMBIGUOUS_BP
1	53800692	53835620	5circ_000136	10	-	3	10	40	40	T01	10	0	0	1	GTAG	NA	ANCHOR_UNIQUE,CANONICAL,CIRCULAR,PERFECT_EXT,UNAMBIGUOUS_BP
15	42950261	42966286	5circ_000137	55	-	18	55	40	40	T01	55	0	0	1	GTAG	NA	ANCHOR_UNIQUE,CANONICAL,CIRCULAR,PERFECT_EXT,UNAMBIGUOUS_BP
4	177353307	177353728	5circ_000138	98	+	41	90	40	40	T01	98	0	0	1	GTAG	NA	ANCHOR_UNIQUE,CANONICAL,CIRCULAR,PERFECT_EXT,UNAMBIGUOUS_BP
4	128997873	129003876	5circ_000139	4	-	3	4	5	40	T01	4	0	0	1	GTAG	NA	ANCHOR_UNIQUE,CANONICAL,CIRCULAR,PERFECT_EXT,UNAMBIGUOUS_BP
19	19655315	19655654	5circ_000140	2	-	2	2	40	40	T01	2	0	0	1	GTAG	NA	ANCHOR_UNIQUE,CANONICAL,CIRCULAR,PERFECT_EXT,UNAMBIGUOUS_BP
2	23798137	23834078	5circ_000141	7	-	5	6	40	40	T01	7	0	0	1	GTAG	NA	ANCHOR_UNIQUE,CANONICAL,CIRCULAR,PERFECT_EXT,UNAMBIGUOUS_BP
17	78004169	78031842	5circ_000142	10	+	5	7	35	40	T01	10	0	0	1	GTAG	NA	ANCHOR_UNIQUE,CANONICAL,CIRCULAR,PERFECT_EXT,UNAMBIGUOUS_BP
16	16106737	16111582	5circ_000143	2	+	2	2	40	40	T01	2	0	0	1	GTAG	NA	ANCHOR_UNIQUE,CANONICAL,CIRCULAR,PERFECT_EXT,UNAMBIGUOUS_BP
11	121045673	121055308	5circ_000145	3	+	1	3	5	5	T01	3	0	0	1	GTAG	NA	ANCHOR_UNIQUE,CANONICAL,CIRCULAR,PERFECT_EXT,UNAMBIGUOUS_BP
21	44074323	44094233	5circ_000146	3	+	1	3	5	5	T01	3	0	0	1	GTAG	NA	ANCHOR_UNIQUE,CANONICAL,CIRCULAR,PERFECT_EXT,UNAMBIGUOUS_BP
5	146455055	146457335	5circ_000147	2	+	1	2	40	40	T01	2	0	0	1	GTAG	NA	ANCHOR_UNIQUE,CANONICAL,CIRCULAR,PERFECT_EXT,UNAMBIGUOUS_BP
2	202513718	202532732	5circ_000150	2	+	2	2	40	40	T01	2	0	0	1	GTAG	NA	ANCHOR_UNIQUE,CANONICAL,CIRCULAR,PERFECT_EXT,UNAMBIGUOUS_BP
3	172247532	172251541	5circ_000152	150	+	53	150	40	40	T01	150	0	0	1	GTAG	NA	ANCHOR_UNIQUE,CANONICAL,CIRCULAR,PERFECT_EXT,UNAMBIGUOUS_BP
2	43225802	43226264	5circ_000153	2	-	1	2	40	40	T01	2	0	0	1	GTAG	NA	ANCHOR_UNIQUE,CANONICAL,CIRCULAR,PERFECT_EXT,UNAMBIGUOUS_BP
9	109033306	109038117	5circ_000154	3	-	1	3	40	5	T01	3	0	0	1	GTAG	NA	ANCHOR_UNIQUE,CANONICAL,CIRCULAR,PERFECT_EXT,UNAMBIGUOUS_BP
12	13058450	13080914	5circ_000155	2	+	1	2	40	5	T01	2	0	0	1	GTAG	NA	ANCHOR_UNIQUE,CANONICAL,CIRCULAR,PERFECT_EXT,UNAMBIGUOUS_BP
3	38221577	38230430	5circ_000157	4	+	3	4	40	5	T01	4	0	0	1	GTAG	NA	ANCHOR_UNIQUE,CANONICAL,CIRCULAR,PERFECT_EXT,UNAMBIGUOUS_BP
9	97347313	97350555	5circ_000158	13	+	5	12	40	40	T01	13	0	0	1	GTAG	NA	ANCHOR_UNIQUE,CANONICAL,CIRCULAR,PERFECT_EXT,UNAMBIGUOUS_BP
1	55099770	55107430	5circ_000159	2	-	2	2	40	40	T01	2	0	0	1	GTAG	NA	ANCHOR_UNIQUE,CANONICAL,CIRCULAR,PERFECT_EXT,UNAMBIGUOUS_BP
4	139341039	139361937	5circ_000161	3	+	1	3	40	5	T01	3	0	1	1	GTAG	NA	ANCHOR_UNIQUE,CANONICAL,CIRCULAR,GOOD_EXT,UNAMBIGUOUS_BP
5	135345967	135389126	5circ_000162	4	-	1	4	40	40	T01	4	0	0	1	GTAG	NA	ANCHOR_UNIQUE,CANONICAL,CIRCULAR,PERFECT_EXT,UNAMBIGUOUS_BP
9	120437294	120448126	5circ_000163	3	-	2	3	40	40	T01	3	0	0	1	GTAG	NA	ANCHOR_UNIQUE,CANONICAL,CIRCULAR,PERFECT_EXT,UNAMBIGUOUS_BP
17	75594474	75596899	5circ_000164	2	+	1	2	5	40	T01	2	0	0	1	GTAG	NA	ANCHOR_UNIQUE,CANONICAL,CIRCULAR,PERFECT_EXT,UNAMBIGUOUS_BP
17	35624396	35641975	5circ_000166	4	+	2	4	5	5	T01	4	0	0	1	GTAG	NA	ANCHOR_UNIQUE,CANONICAL,CIRCULAR,PERFECT_EXT,UNAMBIGUOUS_BP
5	73074741	73078312	5circ_000167	11	+	3	11	40	40	T01	11	0	0	1	GTAG	NA	ANCHOR_UNIQUE,CANONICAL,CIRCULAR,PERFECT_EXT,UNAMBIGUOUS_BP
9	4676461	4676749	5circ_000168	2	-	1	2	40	5	T01	2	1	0	1	GTAG	NA	ANCHOR_UNIQUE,CANONICAL,CIRCULAR,GOOD_EXT,UNAMBIGUOUS_BP
22	19048439	19063278	5circ_000169	3	-	1	3	5	40	T01	3	0	0	1	GTAG	NA	ANCHOR_UNIQUE,CANONICAL,CIRCULAR,PERFECT_EXT,UNAMBIGUOUS_BP
15	42827927	42840433	5circ_000170	6	-	3	6	40	40	T01	6	0	0	1	GTAG	NA	ANCHOR_UNIQUE,CANONICAL,CIRCULAR,PERFECT_EXT,UNAMBIGUOUS_BP
22	29822334	29825780	5circ_000173	2	-	1	2	5	40	T01	2	0	0	1	GTAG	NA	ANCHOR_UNIQUE,CANONICAL,CIRCULAR,PERFECT_EXT,UNAMBIGUOUS_BP
1	95143890	95191681	5circ_000174	6	+	2	6	5	40	T01	6	0	0	1	GTAG	NA	ANCHOR_UNIQUE,CANONICAL,CIRCULAR,PERFECT_EXT,UNAMBIGUOUS_BP
6	18185771	18188002	5circ_000175	3	+	2	3	40	40	T01	3	0	0	1	GTAG	NA	ANCHOR_UNIQUE,CANONICAL,CIRCULAR,PERFECT_EXT,UNAMBIGUOUS_BP
15	33539349	33586116	5circ_000176	4	+	1	4	40	40	T01	4	0	0	1	GTAG	NA	ANCHOR_UNIQUE,CANONICAL,CIRCULAR,PERFECT_EXT,UNAMBIGUOUS_BP
17	19958013	19958571	5circ_000177	27	-	11	27	40	40	T01	27	0	0	1	GTAG	NA	ANCHOR_UNIQUE,CANONICAL,CIRCULAR,PERFECT_EXT,UNAMBIGUOUS_BP
17	39724725	39725853	5circ_000178	9	+	3	6	40	40	T01	9	0	0	1	GTAG	NA	ANCHOR_UNIQUE,CANONICAL,CIRCULAR,PERFECT_EXT,UNAMBIGUOUS_BP
11	129767312	129775158	5circ_000180	2	-	1	2	5	5	T01	2	0	0	1	GTAG	NA	ANCHOR_UNIQUE,CANONICAL,CIRCULAR,PERFECT_EXT,UNAMBIGUOUS_BP
16	67744287	67759732	5circ_000182	30	-	16	27	40	40	T01	30	0	0	1	GTAG	NA	ANCHOR_UNIQUE,CANONICAL,CIRCULAR,PERFECT_EXT,UNAMBIGUOUS_BP
17	4016322	4019769	5circ_000183	4	-	2	4	5	40	T01	4	0	0	1	GTAG	NA	ANCHOR_UNIQUE,CANONICAL,CIRCULAR,PERFECT_EXT,UNAMBIGUOUS_BP
20	47246007	47246517	5circ_000185	15	-	11	15	40	40	T01	15	0	0	1	GTAG	NA	ANCHOR_UNIQUE,CANONICAL,CIRCULAR,PERFECT_EXT,UNAMBIGUOUS_BP
5	168557422	168564065	5circ_000188	12	-	2	7	5	40	T01	12	0	0	1	GTAG	NA	ANCHOR_UNIQUE,CANONICAL,CIRCULAR,PERFECT_EXT,UNAMBIGUOUS_BP
14	21503172	21503881	5circ_000189	203	-	57	199	40	40	T01	203	0	0	1	GTAG	NA	ANCHOR_UNIQUE,CANONICAL,CIRCULAR,PERFECT_EXT,UNAMBIGUOUS_BP
4	78850923	78865720	5circ_000190	3	+	2	3	40	40	T01	3	0	0	1	GTAG	NA	ANCHOR_UNIQUE,CANONICAL,CIRCULAR,PERFECT_EXT,UNAMBIGUOUS_BP
17	39684596	39686019	5circ_000191	14	-	6	14	40	40	T01	14	0	0	1	GTAG	NA	ANCHOR_UNIQUE,CANONICAL,CIRCULAR,PERFECT_EXT,UNAMBIGUOUS_BP
13	99539445	99543995	5circ_000192	9	+	4	9	40	40	T01	9	0	0	1	GTAG	NA	ANCHOR_UNIQUE,CANONICAL,CIRCULAR,PERFECT_EXT,UNAMBIGUOUS_BP
11	47358843	47375729	5circ_000193	104	-	42	97	40	40	T01	104	0	0	1	GTAG	NA	ANCHOR_UNIQUE,CANONICAL,CIRCULAR,PERFECT_EXT,UNAMBIGUOUS_BP
17	67959540	67975958	5circ_000194	6	+	1	6	5	40	T01	6	0	0	1	GTAG	NA	ANCHOR_UNIQUE,CANONICAL,CIRCULAR,PERFECT_EXT,UNAMBIGUOUS_BP
10	31373017	31389695	5circ_000197	6	+	4	6	40	40	T01	6	0	0	1	GTAG	NA	ANCHOR_UNIQUE,CANONICAL,CIRCULAR,PERFECT_EXT,UNAMBIGUOUS_BP
16	5027134	5028185	5circ_000198	9	-	1	9	35	40	T01	9	0	0	1	GTAG	NA	ANCHOR_UNIQUE,CANONICAL,CIRCULAR,PERFECT_EXT,UNAMBIGUOUS_BP
1	51437105	51447266	5circ_000199	2	-	1	2	5	5	T01	2	1	0	1	GTAG	NA	ANCHOR_UNIQUE,CANONICAL,CIRCULAR,GOOD_EXT,UNAMBIGUOUS_BP
6	110435851	110457017	5circ_000201	2	-	1	2	40	40	T01	2	0	0	1	GTAG	NA	ANCHOR_UNIQUE,CANONICAL,CIRCULAR,PERFECT_EXT,UNAMBIGUOUS_BP
10	73217889	73219966	5circ_000203	2	-	1	2	40	5	T01	2	0	0	1	GTAG	NA	ANCHOR_UNIQUE,CANONICAL,CIRCULAR,PERFECT_EXT,UNAMBIGUOUS_BP
1	207694352	207701618	5circ_000205	24	+	8	19	40	40	T01	24	0	0	1	GTAG	NA	ANCHOR_UNIQUE,CANONICAL,CIRCULAR,PERFECT_EXT,UNAMBIGUOUS_BP
16	67036638	67066798	5circ_000207	3	+	1	3	40	5	T01	3	0	0	1	GTAG	NA	ANCHOR_UNIQUE,CANONICAL,CIRCULAR,PERFECT_EXT,UNAMBIGUOUS_BP
2	37003541	37075634	5circ_000208	4	-	1	4	40	5	T01	4	0	0	1	GTAG	NA	ANCHOR_UNIQUE,CANONICAL,CIRCULAR,PERFECT_EXT,UNAMBIGUOUS_BP
1	225852663	225857017	5circ_000209	7	-	2	7	40	5	T01	7	0	0	1	GTAG	NA	ANCHOR_UNIQUE,CANONICAL,CIRCULAR,PERFECT_EXT,UNAMBIGUOUS_BP
8	41704040	41714254	5circ_000210	33	-	11	32	40	40	T01	33	0	0	1	GTAG	NA	ANCHOR_UNIQUE,CANONICAL,CIRCULAR,PERFECT_EXT,UNAMBIGUOUS_BP
7	16258389	16308627	5circ_000211	4	-	2	4	40	40	T01	4	0	0	1	GTAG	NA	ANCHOR_UNIQUE,CANONICAL,CIRCULAR,PERFECT_EXT,UNAMBIGUOUS_BP
1	113833110	113855049	5circ_000213	3	-	2	3	40	40	T01	3	0	0	1	GTAG	NA	ANCHOR_UNIQUE,CANONICAL,CIRCULAR,PERFECT_EXT,UNAMBIGUOUS_BP
6	24424790	24436736	5circ_000214	6	-	4	6	40	40	T01	6	0	0	1	GTAG	NA	ANCHOR_UNIQUE,CANONICAL,CIRCULAR,PERFECT_EXT,UNAMBIGUOUS_BP
11	114063210	114064568	5circ_000215	11	+	2	11	40	40	T01	11	0	0	1	GTAG	NA	ANCHOR_UNIQUE,CANONICAL,CIRCULAR,PERFECT_EXT,UNAMBIGUOUS_BP
17	16057513	16064187	5circ_000216	3	-	1	3	40	5	T01	3	0	0	1	GTAG	NA	ANCHOR_UNIQUE,CANONICAL,CIRCULAR,PERFECT_EXT,UNAMBIGUOUS_BP
9	105534492	105539351	5circ_000218	6	+	2	6	40	5	T01	6	0	0	1	GTAG	NA	ANCHOR_UNIQUE,CANONICAL,CIRCULAR,PERFECT_EXT,UNAMBIGUOUS_BP
1	197188291	197191899	5circ_000219	2	-	1	2	5	40	T01	2	0	0	1	GTAG	NA	ANCHOR_UNIQUE,CANONICAL,CIRCULAR,PERFECT_EXT,UNAMBIGUOUS_BP
1	91508261	91515876	5circ_000220	2	+	1	2	35	5	T01	2	0	0	1	GTAG	NA	ANCHOR_UNIQUE,CANONICAL,CIRCULAR,PERFECT_EXT,UNAMBIGUOUS_BP
11	3768580	3771928	5circ_000221	2	-	2	2	40	40	T01	2	0	0	1	GTAG	NA	ANCHOR_UNIQUE,CANONICAL,CIRCULAR,PERFECT_EXT,UNAMBIGUOUS_BP
1	55085941	55094087	5circ_000222	2	-	2	2	40	40	T01	2	0	0	1	GTAG	NA	ANCHOR_UNIQUE,CANONICAL,CIRCULAR,PERFECT_EXT,UNAMBIGUOUS_BP
X	47845490	47846321	5circ_000223	4	+	1	4	5	40	T01	4	0	0	1	GTAG	NA	ANCHOR_UNIQUE,CANONICAL,CIRCULAR,PERFECT_EXT,UNAMBIGUOUS_BP
X	65075473	65113813	5circ_000224	5	+	4	5	40	35	T01	5	0	0	1	GTAG	NA	ANCHOR_UNIQUE,CANONICAL,CIRCULAR,PERFECT_EXT,UNAMBIGUOUS_BP
16	74892483	74904100	5circ_000225	4	-	3	4	40	40	T01	4	0	0	1	GTAG	NA	ANCHOR_UNIQUE,CANONICAL,CIRCULAR,PERFECT_EXT,UNAMBIGUOUS_BP
15	94356136	94402019	5circ_000226	3	+	2	2	40	5	T01	3	0	0	1	GTAG	NA	ANCHOR_UNIQUE,CANONICAL,CIRCULAR,PERFECT_EXT,UNAMBIGUOUS_BP
4	109491326	109494856	5circ_000228	77	+	33	74	40	40	T01	77	0	0	1	GTAG	NA	ANCHOR_UNIQUE,CANONICAL,CIRCULAR,PERFECT_EXT,UNAMBIGUOUS_BP
5	172052928	172061268	5circ_000229	16	-	5	14	40	40	T01	16	0	0	1	GTAG	NA	ANCHOR_UNIQUE,CANONICAL,CIRCULAR,PERFECT_EXT,UNAMBIGUOUS_BP
22	26457858	26458577	5circ_000231	32	-	17	32	40	40	T01	32	0	0	1	GTAG	NA	ANCHOR_UNIQUE,CANONICAL,CIRCULAR,PERFECT_EXT,UNAMBIGUOUS_BP
3	101852084	101857459	5circ_000232	3	+	1	3	40	40	T01	3	0	0	1	GTAG	NA	ANCHOR_UNIQUE,CANONICAL,CIRCULAR,PERFECT_EXT,UNAMBIGUOUS_BP
2	151467999	151475219	5circ_000233	2	+	1	2	40	5	T01	2	0	0	1	GTAG	NA	ANCHOR_UNIQUE,CANONICAL,CIRCULAR,PERFECT_EXT,UNAMBIGUOUS_BP
3	128795359	128813471	5circ_000235	3	+	2	3	40	40	T01	3	0	0	1	GTAG	NA	ANCHOR_UNIQUE,CANONICAL,CIRCULAR,PERFECT_EXT,UNAMBIGUOUS_BP
1	32219699	32222018	5circ_000236	10	-	2	10	40	40	T01	10	0	0	1	GTAG	NA	ANCHOR_UNIQUE,CANONICAL,CIRCULAR,PERFECT_EXT,UNAMBIGUOUS_BP
1	154249238	154251653	5circ_000237	23	+	10	20	40	40	T01	23	0	0	1	GTAG	NA	ANCHOR_UNIQUE,CANONICAL,CIRCULAR,PERFECT_EXT,UNAMBIGUOUS_BP
1	28473553	28476291	5circ_000238	4	+	3	4	40	40	T01	4	0	0	1	GTAG	NA	ANCHOR_UNIQUE,CANONICAL,CIRCULAR,PERFECT_EXT,UNAMBIGUOUS_BP
22	29822334	29825257	5circ_000239	3	-	1	3	5	40	T01	3	0	0	1	GTAG	NA	ANCHOR_UNIQUE,CANONICAL,CIRCULAR,PERFECT_EXT,UNAMBIGUOUS_BP
17	29118044	29128544	5circ_000240	3	-	2	3	37	40	T01	3	0	0	1	GTAG	NA	ANCHOR_UNIQUE,CANONICAL,CIRCULAR,PERFECT_EXT,UNAMBIGUOUS_BP
1	33276099	33281811	5circ_000241	2	+	2	2	5	40	T01	2	0	0	1	GTAG	NA	ANCHOR_UNIQUE,CANONICAL,CIRCULAR,PERFECT_EXT,UNAMBIGUOUS_BP
14	64801284	64823145	5circ_000242	2	-	2	2	40	40	T01	2	0	0	1	GTAG	NA	ANCHOR_UNIQUE,CANONICAL,CIRCULAR,PERFECT_EXT,UNAMBIGUOUS_BP
20	44479967	44480444	5circ_000243	2	+	2	2	40	5	T01	2	0	0	1	GTAG	NA	ANCHOR_UNIQUE,CANONICAL,CIRCULAR,PERFECT_EXT,UNAMBIGUOUS_BP
11	46542684	46545704	5circ_000245	4	-	2	4	40	40	T01	4	0	0	1	GTAG	NA	ANCHOR_UNIQUE,CANONICAL,CIRCULAR,PERFECT_EXT,UNAMBIGUOUS_BP
10	102484159	102485733	5circ_000246	3	-	3	3	40	40	T01	3	0	0	1	GTAG	NA	ANCHOR_UNIQUE,CANONICAL,CIRCULAR,PERFECT_EXT,UNAMBIGUOUS_BP
12	89609936	89635251	5circ_000247	2	-	1	2	5	5	T01	2	0	0	1	GTAG	NA	ANCHOR_UNIQUE,CANONICAL,CIRCULAR,PERFECT_EXT,UNAMBIGUOUS_BP
6	53520777	53532766	5circ_000248	3	-	2	3	40	40	T01	3	0	0	1	GTAG	NA	ANCHOR_UNIQUE,CANONICAL,CIRCULAR,PERFECT_EXT,UNAMBIGUOUS_BP
X	132378478	132378758	5circ_000249	5	-	1	5	40	40	T01	5	2	0	1	GTAG	NA	ANCHOR_UNIQUE,CANONICAL,CIRCULAR,OK_EXT,UNAMBIGUOUS_BP
2	32114637	32116212	5circ_000251	13	+	4	9	40	40	T01	13	0	0	1	GTAG	NA	ANCHOR_UNIQUE,CANONICAL,CIRCULAR,PERFECT_EXT,UNAMBIGUOUS_BP
7	106097689	106099282	5circ_000253	33	-	17	33	40	40	T01	33	0	0	1	GTAG	NA	ANCHOR_UNIQUE,CANONICAL,CIRCULAR,PERFECT_EXT,UNAMBIGUOUS_BP
1	17092407	17105061	5circ_000254	12	-	2	12	40	5	T01	12	0	0	1	GTAG	NA	ANCHOR_UNIQUE,CANONICAL,CIRCULAR,PERFECT_EXT,UNAMBIGUOUS_BP
1	70421565	70424416	5circ_000255	4	+	2	4	40	40	T01	4	0	0	1	GTAG	NA	ANCHOR_UNIQUE,CANONICAL,CIRCULAR,PERFECT_EXT,UNAMBIGUOUS_BP
11	3731390	3773739	5circ_000257	5	-	2	5	40	35	T01	5	0	0	1	GTAG	NA	ANCHOR_UNIQUE,CANONICAL,CIRCULAR,PERFECT_EXT,UNAMBIGUOUS_BP
3	71041327	71047095	5circ_000259	2	-	1	2	40	40	T01	2	0	0	1	GTAG	NA	ANCHOR_UNIQUE,CANONICAL,CIRCULAR,PERFECT_EXT,UNAMBIGUOUS_BP
14	49650264	49655843	5circ_000260	15	-	6	15	40	40	T01	15	0	0	1	GTAG	NA	ANCHOR_UNIQUE,CANONICAL,CIRCULAR,PERFECT_EXT,UNAMBIGUOUS_BP
16	71658232	71679535	5circ_000261	67	-	32	61	40	40	T01	67	0	0	1	GTAG	NA	ANCHOR_UNIQUE,CANONICAL,CIRCULAR,PERFECT_EXT,UNAMBIGUOUS_BP
1	35474804	35479212	5circ_000262	8	-	2	8	40	40	T01	8	0	0	1	GTAG	NA	ANCHOR_UNIQUE,CANONICAL,CIRCULAR,PERFECT_EXT,UNAMBIGUOUS_BP
2	190900563	190905167	5circ_000263	4	+	1	4	5	40	T01	4	0	0	1	GTAG	NA	ANCHOR_UNIQUE,CANONICAL,CIRCULAR,PERFECT_EXT,UNAMBIGUOUS_BP
13	71557023	71573573	5circ_000264	2	-	1	2	40	40	T01	2	0	0	1	GTAG	NA	ANCHOR_UNIQUE,CANONICAL,CIRCULAR,PERFECT_EXT,UNAMBIGUOUS_BP
9	137775108	137818138	5circ_000266	4	+	1	4	40	40	T01	4	0	0	1	GTAG	NA	ANCHOR_UNIQUE,CANONICAL,CIRCULAR,PERFECT_EXT,UNAMBIGUOUS_BP
1	29149008	29160517	5circ_000267	10	-	4	10	40	40	T01	10	0	0	1	GTAG	NA	ANCHOR_UNIQUE,CANONICAL,CIRCULAR,PERFECT_EXT,UNAMBIGUOUS_BP
3	47498285	47501851	5circ_000268	6	-	1	6	5	40	T01	6	0	0	1	GTAG	NA	ANCHOR_UNIQUE,CANONICAL,CIRCULAR,PERFECT_EXT,UNAMBIGUOUS_BP
10	86472207	86473973	5circ_000269	3	-	2	3	40	40	T01	3	0	0	1	GTAG	NA	ANCHOR_UNIQUE,CANONICAL,CIRCULAR,PERFECT_EXT,UNAMBIGUOUS_BP
3	11313303	11333093	5circ_000270	4	+	2	4	40	40	T01	4	0	0	1	GTAG	NA	ANCHOR_UNIQUE,CANONICAL,CIRCULAR,PERFECT_EXT,UNAMBIGUOUS_BP
16	8929368	8930397	5circ_000271	4	-	2	4	40	5	T01	4	0	0	1	GTAG	NA	ANCHOR_UNIQUE,CANONICAL,CIRCULAR,PERFECT_EXT,UNAMBIGUOUS_BP
8	25460383	25480124	5circ_000272	4	+	2	4	5	40	T01	4	0	0	1	GTAG	NA	ANCHOR_UNIQUE,CANONICAL,CIRCULAR,PERFECT_EXT,UNAMBIGUOUS_BP
9	134401631	134409119	5circ_000273	4	+	3	4	40	40	T01	4	0	0	1	GTAG	NA	ANCHOR_UNIQUE,CANONICAL,CIRCULAR,PERFECT_EXT,UNAMBIGUOUS_BP
9	20923659	20933132	5circ_000274	6	+	4	6	40	40	T01	6	0	0	1	GTAG	NA	ANCHOR_UNIQUE,CANONICAL,CIRCULAR,PERFECT_EXT,UNAMBIGUOUS_BP
12	11047019	11121180	5circ_000275	7	-	2	7	5	5	T01	7	0	0	1	GTAG	NA	ANCHOR_UNIQUE,CANONICAL,CIRCULAR,PERFECT_EXT,UNAMBIGUOUS_BP
17	68429995	68436479	5circ_000276	2	-	2	2	40	5	T01	2	0	0	1	GTAG	NA	ANCHOR_UNIQUE,CANONICAL,CIRCULAR,PERFECT_EXT,UNAMBIGUOUS_BP
11	61899313	61904882	5circ_000277	14	-	3	14	40	5	T01	14	0	0	1	GTAG	NA	ANCHOR_UNIQUE,CANONICAL,CIRCULAR,PERFECT_EXT,UNAMBIGUOUS_BP
3	188524664	188609844	5circ_000279	2	+	1	2	40	40	T01	2	0	0	1	GTAG	NA	ANCHOR_UNIQUE,CANONICAL,CIRCULAR,PERFECT_EXT,UNAMBIGUOUS_BP
17	43070927	43074521	5circ_000280	3	-	1	3	5	40	T01	3	0	0	1	GTAG	NA	ANCHOR_UNIQUE,CANONICAL,CIRCULAR,PERFECT_EXT,UNAMBIGUOUS_BP
3	63951334	63990859	5circ_000281	2	+	2	2	40	40	T01	2	0	0	1	GTAG	NA	ANCHOR_UNIQUE,CANONICAL,CIRCULAR,PERFECT_EXT,UNAMBIGUOUS_BP
18	56624287	56626457	5circ_000282	6	-	3	6	40	40	T01	6	0	0	1	GTAG	NA	ANCHOR_UNIQUE,CANONICAL,CIRCULAR,PERFECT_EXT,UNAMBIGUOUS_BP
2	202952558	202955758	5circ_000283	8	+	5	8	40	40	T01	8	0	0	1	GTAG	NA	ANCHOR_UNIQUE,CANONICAL,CIRCULAR,PERFECT_EXT,UNAMBIGUOUS_BP
5	74745677	74750667	5circ_000284	3	-	3	2	40	40	T01	3	0	0	1	GTAG	NA	ANCHOR_UNIQUE,CANONICAL,CIRCULAR,PERFECT_EXT,UNAMBIGUOUS_BP
15	64974601	64976555	5circ_000285	2	-	1	2	5	40	T01	2	0	1	1	GTAG	NA	ANCHOR_UNIQUE,CANONICAL,CIRCULAR,GOOD_EXT,UNAMBIGUOUS_BP
7	90726566	90726812	5circ_000286	4	+	1	4	5	40	T01	4	0	0	1	GTAG	NA	ANCHOR_UNIQUE,CANONICAL,CIRCULAR,PERFECT_EXT,UNAMBIGUOUS_BP
9	136224006	136226874	5circ_000288	23	-	8	21	40	40	T01	23	0	0	1	GTAG	NA	ANCHOR_UNIQUE,CANONICAL,CIRCULAR,PERFECT_EXT,UNAMBIGUOUS_BP
1	95143890	95151419	5circ_000289	1880	+	253	1206	40	40	T01	1880	0	0	1	GTAG	NA	ANCHOR_UNIQUE,CANONICAL,CIRCULAR,PERFECT_EXT,UNAMBIGUOUS_BP
2	74159090	74167107	5circ_000290	4	-	2	2	40	5	T01	4	0	0	1	GTAG	NA	ANCHOR_UNIQUE,CANONICAL,CIRCULAR,PERFECT_EXT,UNAMBIGUOUS_BP
1	110346307	110356031	5circ_000291	4	+	1	4	5	5	T01	4	0	0	1	GTAG	NA	ANCHOR_UNIQUE,CANONICAL,CIRCULAR,PERFECT_EXT,UNAMBIGUOUS_BP
4	94618003	94640450	5circ_000292	5	+	1	5	5	40	T01	5	0	0	1	GTAG	NA	ANCHOR_UNIQUE,CANONICAL,CIRCULAR,PERFECT_EXT,UNAMBIGUOUS_BP
14	31122913	31133675	5circ_000293	3	-	1	3	40	40	T01	3	0	0	1	GTAG	NA	ANCHOR_UNIQUE,CANONICAL,CIRCULAR,PERFECT_EXT,UNAMBIGUOUS_BP
19	46838053	46839578	5circ_000294	2	-	2	2	5	40	T01	2	0	0	1	GTAG	NA	ANCHOR_UNIQUE,CANONICAL,CIRCULAR,PERFECT_EXT,UNAMBIGUOUS_BP
12	115963406	115969097	5circ_000295	2	-	2	2	40	5	T01	2	0	0	1	GTAG	NA	ANCHOR_UNIQUE,CANONICAL,CIRCULAR,PERFECT_EXT,UNAMBIGUOUS_BP
12	62580296	62588156	5circ_000296	2	+	1	2	40	5	T01	2	0	0	1	GTAG	NA	ANCHOR_UNIQUE,CANONICAL,CIRCULAR,PERFECT_EXT,UNAMBIGUOUS_BP
6	97267871	97273062	5circ_000297	7	-	3	7	40	40	T01	7	0	0	1	GTAG	NA	ANCHOR_UNIQUE,CANONICAL,CIRCULAR,PERFECT_EXT,UNAMBIGUOUS_BP
11	1286001	1295794	5circ_000298	14	-	9	13	40	40	T01	14	0	0	1	GTAG	NA	ANCHOR_UNIQUE,CANONICAL,CIRCULAR,PERFECT_EXT,UNAMBIGUOUS_BP
21	36356619	36364259	5circ_000299	6	+	2	6	5	40	T01	6	0	0	1	GTAG	NA	ANCHOR_UNIQUE,CANONICAL,CIRCULAR,PERFECT_EXT,UNAMBIGUOUS_BP
1	110009033	110014857	5circ_000303	3	+	1	3	35	40	T01	3	0	0	1	GTAG	NA	ANCHOR_UNIQUE,CANONICAL,CIRCULAR,PERFECT_EXT,UNAMBIGUOUS_BP
11	118583178	118584644	5circ_000304	5	+	2	5	40	40	T01	5	0	0	1	GTAG	NA	ANCHOR_UNIQUE,CANONICAL,CIRCULAR,PERFECT_EXT,UNAMBIGUOUS_BP
1	65379401	65395032	5circ_000305	6	+	1	6	35	5	T01	6	1	0	1	GTAG	NA	ANCHOR_UNIQUE,CANONICAL,CIRCULAR,GOOD_EXT,UNAMBIGUOUS_BP
14	71026116	71036157	5circ_000306	10	+	4	10	40	40	T01	10	0	0	1	GTAG	NA	ANCHOR_UNIQUE,CANONICAL,CIRCULAR,PERFECT_EXT,UNAMBIGUOUS_BP
7	140127441	140129653	5circ_000307	4	-	4	4	40	40	T01	4	0	0	1	GTAG	NA	ANCHOR_UNIQUE,CANONICAL,CIRCULAR,PERFECT_EXT,UNAMBIGUOUS_BP
13	99529466	99541667	5circ_000308	3	+	1	3	40	40	T01	3	0	0	1	GTAG	NA	ANCHOR_UNIQUE,CANONICAL,CIRCULAR,PERFECT_EXT,UNAMBIGUOUS_BP
20	38138112	38151057	5circ_000310	10	-	2	10	40	5	T01	10	0	0	1	GTAG	NA	ANCHOR_UNIQUE,CANONICAL,CIRCULAR,PERFECT_EXT,UNAMBIGUOUS_BP
13	36312144	36312477	5circ_000311	4	-	2	4	40	40	T01	4	0	0	1	GTAG	NA	ANCHOR_UNIQUE,CANONICAL,CIRCULAR,PERFECT_EXT,UNAMBIGUOUS_BP
1	203720548	203722689	5circ_000312	2	+	1	2	40	40	T01	2	0	0	1	GTAG	NA	ANCHOR_UNIQUE,CANONICAL,CIRCULAR,PERFECT_EXT,UNAMBIGUOUS_BP
6	36506582	36540207	5circ_000313	2	-	1	2	5	40	T01	2	0	0	1	GTAG	NA	ANCHOR_UNIQUE,CANONICAL,CIRCULAR,PERFECT_EXT,UNAMBIGUOUS_BP
18	77095367	77105286	5circ_000314	2	-	2	2	40	40	T01	2	0	0	1	GTAG	NA	ANCHOR_UNIQUE,CANONICAL,CIRCULAR,PERFECT_EXT,UNAMBIGUOUS_BP
20	49135832	49154071	5circ_000316	6	-	1	6	5	5	T01	6	0	0	1	GTAG	NA	ANCHOR_UNIQUE,CANONICAL,CIRCULAR,PERFECT_EXT,UNAMBIGUOUS_BP
6	42648117	42652645	5circ_000317	2	+	1	2	35	5	T01	2	0	0	1	GTAG	NA	ANCHOR_UNIQUE,CANONICAL,CIRCULAR,PERFECT_EXT,UNAMBIGUOUS_BP
13	28174271	28256539	5circ_000319	2	+	1	2	5	40	T01	2	1	0	1	GTAG	NA	ANCHOR_UNIQUE,CANONICAL,CIRCULAR,GOOD_EXT,UNAMBIGUOUS_BP
8	26624142	26634900	5circ_000320	12	+	4	12	40	40	T01	12	0	0	1	GTAG	NA	ANCHOR_UNIQUE,CANONICAL,CIRCULAR,PERFECT_EXT,UNAMBIGUOUS_BP
20	59773278	59774490	5circ_000321	2	+	2	2	40	40	T01	2	0	0	1	GTAG	NA	ANCHOR_UNIQUE,CANONICAL,CIRCULAR,PERFECT_EXT,UNAMBIGUOUS_BP
3	129458598	129464781	5circ_000322	4	+	4	4	40	40	T01	4	0	0	1	GTAG	NA	ANCHOR_UNIQUE,CANONICAL,CIRCULAR,PERFECT_EXT,UNAMBIGUOUS_BP
15	25393745	25415842	5circ_000323	3	-	2	3	40	5	T01	3	0	0	1	GTAG	NA	ANCHOR_UNIQUE,CANONICAL,CIRCULAR,PERFECT_EXT,UNAMBIGUOUS_BP
12	50427761	50461347	5circ_000324	4	+	2	3	5	40	T01	4	0	0	1	GTAG	NA	ANCHOR_UNIQUE,CANONICAL,CIRCULAR,PERFECT_EXT,UNAMBIGUOUS_BP
17	35587329	35601071	5circ_000325	3	+	1	3	40	5	T01	3	0	0	1	GTAG	NA	ANCHOR_UNIQUE,CANONICAL,CIRCULAR,PERFECT_EXT,UNAMBIGUOUS_BP
11	121486342	121497049	5circ_000327	8	+	2	7	5	40	T01	8	0	0	1	GTAG	NA	ANCHOR_UNIQUE,CANONICAL,CIRCULAR,PERFECT_EXT,UNAMBIGUOUS_BP
16	23420707	23423408	5circ_000328	3	-	1	3	40	40	T01	3	1	0	1	GTAG	NA	ANCHOR_UNIQUE,CANONICAL,CIRCULAR,GOOD_EXT,UNAMBIGUOUS_BP
2	26204061	26215175	5circ_000329	3	-	2	3	5	40	T01	3	0	0	1	GTAG	NA	ANCHOR_UNIQUE,CANONICAL,CIRCULAR,PERFECT_EXT,UNAMBIGUOUS_BP
1	185145438	185151935	5circ_000331	2	-	1	2	5	5	T01	2	0	0	1	GTAG	NA	ANCHOR_UNIQUE,CANONICAL,CIRCULAR,PERFECT_EXT,UNAMBIGUOUS_BP
14	22926132	22927660	5circ_000332	16	-	10	16	40	40	T01	16	0	0	1	GTAG	NA	ANCHOR_UNIQUE,CANONICAL,CIRCULAR,PERFECT_EXT,UNAMBIGUOUS_BP
1	77717866	77725762	5circ_000333	35	-	12	34	40	40	T01	35	0	0	1	GTAG	NA	ANCHOR_UNIQUE,CANONICAL,CIRCULAR,PERFECT_EXT,UNAMBIGUOUS_BP
9	36356302	36357942	5circ_000334	4	-	2	4	37	40	T01	4	0	0	1	GTAG	NA	ANCHOR_UNIQUE,CANONICAL,CIRCULAR,PERFECT_EXT,UNAMBIGUOUS_BP
11	121045673	121047667	5circ_000335	6	+	2	6	40	40	T01	6	0	0	1	GTAG	NA	ANCHOR_UNIQUE,CANONICAL,CIRCULAR,PERFECT_EXT,UNAMBIGUOUS_BP
10	101803734	101813127	5circ_000336	6	-	2	6	40	40	T01	6	0	0	1	GTAG	NA	ANCHOR_UNIQUE,CANONICAL,CIRCULAR,PERFECT_EXT,UNAMBIGUOUS_BP
2	241407536	241413421	5circ_000337	2	+	1	2	40	40	T01	2	0	0	1	GTAG	NA	ANCHOR_UNIQUE,CANONICAL,CIRCULAR,PERFECT_EXT,UNAMBIGUOUS_BP
6	118565528	118566316	5circ_000338	3	-	3	3	40	35	T01	3	0	0	1	GTAG	NA	ANCHOR_UNIQUE,CANONICAL,CIRCULAR,PERFECT_EXT,UNAMBIGUOUS_BP
2	119926597	119945240	5circ_000339	7	+	5	7	40	5	T01	7	0	0	1	GTAG	NA	ANCHOR_UNIQUE,CANONICAL,CIRCULAR,PERFECT_EXT,UNAMBIGUOUS_BP
12	79880185	79881692	5circ_000340	2	-	1	2	5	5	T01	2	1	0	1	GTAG	NA	ANCHOR_UNIQUE,CANONICAL,CIRCULAR,GOOD_EXT,UNAMBIGUOUS_BP
17	82478570	82481211	5circ_000343	3	+	1	3	35	40	T01	3	0	0	1	GTAG	NA	ANCHOR_UNIQUE,CANONICAL,CIRCULAR,PERFECT_EXT,UNAMBIGUOUS_BP
2	119956843	119967972	5circ_000344	2	+	1	2	40	40	T01	2	0	0	1	GTAG	NA	ANCHOR_UNIQUE,CANONICAL,CIRCULAR,PERFECT_EXT,UNAMBIGUOUS_BP
12	30710447	30753559	5circ_000345	4	-	3	4	40	40	T01	4	0	0	1	GTAG	NA	ANCHOR_UNIQUE,CANONICAL,CIRCULAR,PERFECT_EXT,UNAMBIGUOUS_BP
20	47262287	47283648	5circ_000346	19	-	10	19	40	40	T01	19	0	0	1	GTAG	NA	ANCHOR_UNIQUE,CANONICAL,CIRCULAR,PERFECT_EXT,UNAMBIGUOUS_BP
14	49669523	49674454	5circ_000347	2	-	2	2	5	40	T01	2	0	0	1	GTAG	NA	ANCHOR_UNIQUE,CANONICAL,CIRCULAR,PERFECT_EXT,UNAMBIGUOUS_BP
11	77683709	77693611	5circ_000348	21	-	12	20	40	40	T01	21	0	0	1	GTAG	NA	ANCHOR_UNIQUE,CANONICAL,CIRCULAR,PERFECT_EXT,UNAMBIGUOUS_BP
16	67744287	67772086	5circ_000349	6	-	3	6	40	40	T01	6	0	0	1	GTAG	NA	ANCHOR_UNIQUE,CANONICAL,CIRCULAR,PERFECT_EXT,UNAMBIGUOUS_BP
2	29032933	29036757	5circ_000352	4	+	2	4	37	40	T01	4	0	0	1	GTAG	NA	ANCHOR_UNIQUE,CANONICAL,CIRCULAR,PERFECT_EXT,UNAMBIGUOUS_BP
17	82763964	82814934	5circ_000353	3	+	1	3	5	5	T01	3	0	0	1	GTAG	NA	ANCHOR_UNIQUE,CANONICAL,CIRCULAR,PERFECT_EXT,UNAMBIGUOUS_BP
12	22659013	22673660	5circ_000354	10	+	4	10	40	40	T01	10	0	0	1	GTAG	NA	ANCHOR_UNIQUE,CANONICAL,CIRCULAR,PERFECT_EXT,UNAMBIGUOUS_BP
9	17309057	17342444	5circ_000355	6	+	6	6	40	40	T01	6	0	0	1	GTAG	NA	ANCHOR_UNIQUE,CANONICAL,CIRCULAR,PERFECT_EXT,UNAMBIGUOUS_BP
12	19283279	19283745	5circ_000357	2	+	2	2	40	40	T01	2	0	0	1	GTAG	NA	ANCHOR_UNIQUE,CANONICAL,CIRCULAR,PERFECT_EXT,UNAMBIGUOUS_BP
6	109050172	109051618	5circ_000358	3	-	1	3	40	5	T01	3	0	0	1	GTAG	NA	ANCHOR_UNIQUE,CANONICAL,CIRCULAR,PERFECT_EXT,UNAMBIGUOUS_BP
17	61965005	61972888	5circ_000359	11	-	4	11	40	5	T01	11	0	0	1	GTAG	NA	ANCHOR_UNIQUE,CANONICAL,CIRCULAR,PERFECT_EXT,UNAMBIGUOUS_BP
15	89113724	89155534	5circ_000360	8	+	3	8	40	40	T01	8	0	0	1	GTAG	NA	ANCHOR_UNIQUE,CANONICAL,CIRCULAR,PERFECT_EXT,UNAMBIGUOUS_BP
12	1777853	1784073	5circ_000361	45	+	20	45	40	40	T01	45	0	0	1	GTAG	NA	ANCHOR_UNIQUE,CANONICAL,CIRCULAR,PERFECT_EXT,UNAMBIGUOUS_BP
3	43549719	43561402	5circ_000363	5	-	3	5	40	40	T01	5	0	0	1	GTAG	NA	ANCHOR_UNIQUE,CANONICAL,CIRCULAR,PERFECT_EXT,UNAMBIGUOUS_BP
1	227030407	227035607	5circ_000364	4	-	2	4	40	40	T01	4	0	0	1	GTAG	NA	ANCHOR_UNIQUE,CANONICAL,CIRCULAR,PERFECT_EXT,UNAMBIGUOUS_BP
6	42632551	42640270	5circ_000365	3	+	2	3	40	5	T01	3	1	0	1	GTAG	NA	ANCHOR_UNIQUE,CANONICAL,CIRCULAR,GOOD_EXT,UNAMBIGUOUS_BP
7	44645326	44681848	5circ_000366	6	+	2	6	5	40	T01	6	0	0	1	GTAG	NA	ANCHOR_UNIQUE,CANONICAL,CIRCULAR,PERFECT_EXT,UNAMBIGUOUS_BP
9	79709622	79721888	5circ_000367	3	+	2	1	40	4	T01	3	0	0	1	GTAG	NA	ANCHOR_UNIQUE,CANONICAL,CIRCULAR,PERFECT_EXT,UNAMBIGUOUS_BP
16	70560468	70564050	5circ_000368	20	+	9	20	40	40	T01	20	0	0	1	GTAG	NA	ANCHOR_UNIQUE,CANONICAL,CIRCULAR,PERFECT_EXT,UNAMBIGUOUS_BP
1	160323430	160332557	5circ_000369	46	-	16	45	40	40	T01	46	0	0	1	GTAG	NA	ANCHOR_UNIQUE,CANONICAL,CIRCULAR,PERFECT_EXT,UNAMBIGUOUS_BP
18	44701174	44701832	5circ_000370	4	+	3	4	5	5	T01	4	0	0	1	GTAG	NA	ANCHOR_UNIQUE,CANONICAL,CIRCULAR,PERFECT_EXT,UNAMBIGUOUS_BP
1	235766078	235770297	5circ_000371	2	-	1	2	5	5	T01	2	0	0	1	GTAG	NA	ANCHOR_UNIQUE,CANONICAL,CIRCULAR,PERFECT_EXT,UNAMBIGUOUS_BP
1	153665219	153668557	5circ_000372	7	-	3	7	5	40	T01	7	0	0	1	GTAG	NA	ANCHOR_UNIQUE,CANONICAL,CIRCULAR,PERFECT_EXT,UNAMBIGUOUS_BP
14	30902535	30956242	5circ_000374	2	-	1	2	40	5	T01	2	0	0	1	GTAG	NA	ANCHOR_UNIQUE,CANONICAL,CIRCULAR,PERFECT_EXT,UNAMBIGUOUS_BP
3	128262127	128264781	5circ_000375	22	+	9	22	40	40	T01	22	0	0	1	GTAG	NA	ANCHOR_UNIQUE,CANONICAL,CIRCULAR,PERFECT_EXT,UNAMBIGUOUS_BP
16	68121986	68123121	5circ_000377	220	+	60	217	40	40	T01	220	0	0	1	GTAG	NA	ANCHOR_UNIQUE,CANONICAL,CIRCULAR,PERFECT_EXT,UNAMBIGUOUS_BP
2	99449335	99464985	5circ_000379	3	-	2	3	40	35	T01	3	0	0	1	GTAG	NA	ANCHOR_UNIQUE,CANONICAL,CIRCULAR,PERFECT_EXT,UNAMBIGUOUS_BP
20	21354788	21368590	5circ_000380	2	+	1	2	40	5	T01	2	0	0	1	GTAG	NA	ANCHOR_UNIQUE,CANONICAL,CIRCULAR,PERFECT_EXT,UNAMBIGUOUS_BP
1	55103875	55107430	5circ_000381	2	-	1	2	5	35	T01	2	0	0	1	GTAG	NA	ANCHOR_UNIQUE,CANONICAL,CIRCULAR,PERFECT_EXT,UNAMBIGUOUS_BP
12	62498918	62501698	5circ_000383	2	+	2	2	40	40	T01	2	0	0	1	GTAG	NA	ANCHOR_UNIQUE,CANONICAL,CIRCULAR,PERFECT_EXT,UNAMBIGUOUS_BP
X	110046356	110109146	5circ_000384	5	+	4	5	40	40	T01	5	0	0	1	GTAG	NA	ANCHOR_UNIQUE,CANONICAL,CIRCULAR,PERFECT_EXT,UNAMBIGUOUS_BP
10	12249580	12250469	5circ_000385	14	+	7	13	40	40	T01	14	1	0	1	GTAG	NA	ANCHOR_UNIQUE,CANONICAL,CIRCULAR,GOOD_EXT,UNAMBIGUOUS_BP
21	29321220	29321514	5circ_000386	3	+	1	3	40	40	T01	3	0	0	1	GTAG	NA	ANCHOR_UNIQUE,CANONICAL,CIRCULAR,PERFECT_EXT,UNAMBIGUOUS_BP
5	149616566	149632192	5circ_000388	3	+	1	3	5	40	T01	3	0	0	1	GTAG	NA	ANCHOR_UNIQUE,CANONICAL,CIRCULAR,PERFECT_EXT,UNAMBIGUOUS_BP
9	125301982	125305149	5circ_000389	7	+	3	7	5	40	T01	7	0	0	1	GTAG	NA	ANCHOR_UNIQUE,CANONICAL,CIRCULAR,PERFECT_EXT,UNAMBIGUOUS_BP
1	5927648	5953947	5circ_000391	2	-	2	2	35	40	T01	2	0	0	1	GTAG	NA	ANCHOR_UNIQUE,CANONICAL,CIRCULAR,PERFECT_EXT,UNAMBIGUOUS_BP
16	21612644	21625115	5circ_000392	23	+	8	23	40	40	T01	23	0	0	1	GTAG	NA	ANCHOR_UNIQUE,CANONICAL,CIRCULAR,PERFECT_EXT,UNAMBIGUOUS_BP
1	234418083	234427766	5circ_000394	3	-	3	3	5	35	T01	3	0	0	1	GTAG	NA	ANCHOR_UNIQUE,CANONICAL,CIRCULAR,PERFECT_EXT,UNAMBIGUOUS_BP
21	46643534	46649739	5circ_000397	4	+	1	4	5	40	T01	4	0	0	1	GTAG	NA	ANCHOR_UNIQUE,CANONICAL,CIRCULAR,PERFECT_EXT,UNAMBIGUOUS_BP
7	77940029	77942786	5circ_000398	4	+	2	4	5	5	T01	4	0	0	1	GTAG	NA	ANCHOR_UNIQUE,CANONICAL,CIRCULAR,PERFECT_EXT,UNAMBIGUOUS_BP
20	37207272	37210165	5circ_000400	15	+	5	12	40	40	T01	15	0	0	1	GTAG	NA	ANCHOR_UNIQUE,CANONICAL,CIRCULAR,PERFECT_EXT,UNAMBIGUOUS_BP
9	33996222	34017189	5circ_000401	3	-	1	3	40	35	T01	3	0	0	1	GTAG	NA	ANCHOR_UNIQUE,CANONICAL,CIRCULAR,PERFECT_EXT,UNAMBIGUOUS_BP
12	6333179	6333373	5circ_000403	2	+	1	2	5	40	T01	2	2	0	1	GTAG	NA	ANCHOR_UNIQUE,CANONICAL,CIRCULAR,OK_EXT,UNAMBIGUOUS_BP
6	36899425	36914693	5circ_000404	3	+	2	3	40	40	T01	3	0	0	1	GTAG	NA	ANCHOR_UNIQUE,CANONICAL,CIRCULAR,PERFECT_EXT,UNAMBIGUOUS_BP
10	69155811	69158211	5circ_000405	2	+	1	2	5	5	T01	2	0	0	1	GTAG	NA	ANCHOR_UNIQUE,CANONICAL,CIRCULAR,PERFECT_EXT,UNAMBIGUOUS_BP
1	179120189	179121867	5circ_000407	7	-	3	7	40	40	T01	7	0	0	1	GTAG	NA	ANCHOR_UNIQUE,CANONICAL,CIRCULAR,PERFECT_EXT,UNAMBIGUOUS_BP
17	17884633	17893810	5circ_000408	5	-	2	5	40	40	T01	5	0	0	1	GTAG	NA	ANCHOR_UNIQUE,CANONICAL,CIRCULAR,PERFECT_EXT,UNAMBIGUOUS_BP
7	148817876	148819687	5circ_000409	2	-	1	2	40	40	T01	2	0	0	1	GTAG	NA	ANCHOR_UNIQUE,CANONICAL,CIRCULAR,PERFECT_EXT,UNAMBIGUOUS_BP
11	85996825	86003451	5circ_000410	165	-	42	156	40	40	T01	165	0	0	1	GTAG	NA	ANCHOR_UNIQUE,CANONICAL,CIRCULAR,PERFECT_EXT,UNAMBIGUOUS_BP
7	139613201	139620563	5circ_000411	3	-	1	3	40	40	T01	3	0	0	1	GTAG	NA	ANCHOR_UNIQUE,CANONICAL,CIRCULAR,PERFECT_EXT,UNAMBIGUOUS_BP
10	119515508	119530352	5circ_000412	6	-	2	6	40	40	T01	6	0	0	1	GTAG	NA	ANCHOR_UNIQUE,CANONICAL,CIRCULAR,PERFECT_EXT,UNAMBIGUOUS_BP
7	50732271	50756056	5circ_000413	3	-	1	3	40	5	T01	3	0	0	1	GTAG	NA	ANCHOR_UNIQUE,CANONICAL,CIRCULAR,PERFECT_EXT,UNAMBIGUOUS_BP
7	2213211	2219456	5circ_000414	2	-	1	2	40	5	T01	2	0	0	1	GTAG	NA	ANCHOR_UNIQUE,CANONICAL,CIRCULAR,PERFECT_EXT,UNAMBIGUOUS_BP
7	23159756	23160352	5circ_000415	3	-	1	3	40	5	T01	3	1	0	1	GTAG	NA	ANCHOR_UNIQUE,CANONICAL,CIRCULAR,GOOD_EXT,UNAMBIGUOUS_BP
2	171448680	171469030	5circ_000416	14	+	5	14	40	40	T01	14	0	0	1	GTAG	NA	ANCHOR_UNIQUE,CANONICAL,CIRCULAR,PERFECT_EXT,UNAMBIGUOUS_BP
5	40852173	40854096	5circ_000418	30	+	11	30	40	40	T01	30	0	0	1	GTAG	NA	ANCHOR_UNIQUE,CANONICAL,CIRCULAR,PERFECT_EXT,UNAMBIGUOUS_BP
9	121030396	121046383	5circ_000419	2	-	1	2	5	40	T01	2	0	0	1	GTAG	NA	ANCHOR_UNIQUE,CANONICAL,CIRCULAR,PERFECT_EXT,UNAMBIGUOUS_BP
7	131387119	131399433	5circ_000420	94	+	31	93	40	40	T01	94	0	0	1	GTAG	NA	ANCHOR_UNIQUE,CANONICAL,CIRCULAR,PERFECT_EXT,UNAMBIGUOUS_BP
2	70160624	70181997	5circ_000421	6	-	4	6	40	40	T01	6	0	0	1	GTAG	NA	ANCHOR_UNIQUE,CANONICAL,CIRCULAR,PERFECT_EXT,UNAMBIGUOUS_BP
3	150622384	150624899	5circ_000423	4	+	2	2	5	5	T01	4	0	0	1	GTAG	NA	ANCHOR_UNIQUE,CANONICAL,CIRCULAR,PERFECT_EXT,UNAMBIGUOUS_BP
3	121449314	121487509	5circ_000424	16	-	7	16	40	40	T01	16	0	0	1	GTAG	NA	ANCHOR_UNIQUE,CANONICAL,CIRCULAR,PERFECT_EXT,UNAMBIGUOUS_BP
11	113741693	113758706	5circ_000426	3	-	1	3	40	35	T01	3	0	0	1	GTAG	NA	ANCHOR_UNIQUE,CANONICAL,CIRCULAR,PERFECT_EXT,UNAMBIGUOUS_BP
5	103096540	103097781	5circ_000427	19	-	10	18	40	40	T01	19	0	0	1	GTAG	NA	ANCHOR_UNIQUE,CANONICAL,CIRCULAR,PERFECT_EXT,UNAMBIGUOUS_BP
15	44626330	44629388	5circ_000428	4	-	2	4	5	5	T01	4	0	0	1	GTAG	NA	ANCHOR_UNIQUE,CANONICAL,CIRCULAR,PERFECT_EXT,UNAMBIGUOUS_BP
5	137985256	137988315	5circ_000429	13	-	3	13	5	40	T01	13	0	0	1	GTAG	NA	ANCHOR_UNIQUE,CANONICAL,CIRCULAR,PERFECT_EXT,UNAMBIGUOUS_BP
16	67628369	67629533	5circ_000430	21	+	10	20	40	40	T01	21	0	0	1	GTAG	NA	ANCHOR_UNIQUE,CANONICAL,CIRCULAR,PERFECT_EXT,UNAMBIGUOUS_BP
2	208572012	208656989	5circ_000431	4	+	2	3	5	5	T01	4	0	0	1	GTAG	NA	ANCHOR_UNIQUE,CANONICAL,CIRCULAR,PERFECT_EXT,UNAMBIGUOUS_BP
14	30935162	30956242	5circ_000432	6	-	4	6	40	40	T01	6	0	0	1	GTAG	NA	ANCHOR_UNIQUE,CANONICAL,CIRCULAR,PERFECT_EXT,UNAMBIGUOUS_BP
3	12924580	12941865	5circ_000433	2	-	1	2	5	5	T01	2	0	0	1	GTAG	NA	ANCHOR_UNIQUE,CANONICAL,CIRCULAR,PERFECT_EXT,UNAMBIGUOUS_BP
17	29676819	29677741	5circ_000435	14	-	3	14	40	40	T01	14	0	0	1	GTAG	NA	ANCHOR_UNIQUE,CANONICAL,CIRCULAR,PERFECT_EXT,UNAMBIGUOUS_BP
6	170388286	170391121	5circ_000438	2	+	1	2	40	40	T01	2	0	0	1	GTAG	NA	ANCHOR_UNIQUE,CANONICAL,CIRCULAR,PERFECT_EXT,UNAMBIGUOUS_BP
10	1056347	1072293	5circ_000439	57	+	26	56	40	40	T01	57	0	0	1	GTAG	NA	ANCHOR_UNIQUE,CANONICAL,CIRCULAR,PERFECT_EXT,UNAMBIGUOUS_BP
12	3821872	3863957	5circ_000441	7	-	2	7	5	40	T01	7	1	0	1	GTAG	NA	ANCHOR_UNIQUE,CANONICAL,CIRCULAR,GOOD_EXT,UNAMBIGUOUS_BP
1	15630324	15633565	5circ_000443	3	+	2	3	40	40	T01	3	0	0	1	GTAG	NA	ANCHOR_UNIQUE,CANONICAL,CIRCULAR,PERFECT_EXT,UNAMBIGUOUS_BP
16	29833732	29834066	5circ_000444	90	+	26	90	40	40	T01	90	0	0	1	GTAG	NA	ANCHOR_UNIQUE,CANONICAL,CIRCULAR,PERFECT_EXT,UNAMBIGUOUS_BP
15	101366195	101370523	5circ_000447	8	-	2	8	40	40	T01	8	0	0	1	GTAG	NA	ANCHOR_UNIQUE,CANONICAL,CIRCULAR,PERFECT_EXT,UNAMBIGUOUS_BP
11	108767372	108768001	5circ_000450	2	+	1	2	40	5	T01	2	0	0	1	GTAG	NA	ANCHOR_UNIQUE,CANONICAL,CIRCULAR,PERFECT_EXT,UNAMBIGUOUS_BP
1	30933221	30966197	5circ_000451	4	-	2	4	5	5	T01	4	0	0	1	GTAG	NA	ANCHOR_UNIQUE,CANONICAL,CIRCULAR,PERFECT_EXT,UNAMBIGUOUS_BP
14	72117405	72154400	5circ_000452	2	+	1	2	5	5	T01	2	0	0	1	GTAG	NA	ANCHOR_UNIQUE,CANONICAL,CIRCULAR,PERFECT_EXT,UNAMBIGUOUS_BP
2	62222211	62225414	5circ_000453	2	+	1	2	5	40	T01	2	0	0	1	GTAG	NA	ANCHOR_UNIQUE,CANONICAL,CIRCULAR,PERFECT_EXT,UNAMBIGUOUS_BP
15	65741714	65752628	5circ_000454	6	-	2	6	40	40	T01	6	0	0	1	GTAG	NA	ANCHOR_UNIQUE,CANONICAL,CIRCULAR,PERFECT_EXT,UNAMBIGUOUS_BP
3	138209816	138223733	5circ_000456	2	+	1	2	5	5	T01	2	0	0	1	GTAG	NA	ANCHOR_UNIQUE,CANONICAL,CIRCULAR,PERFECT_EXT,UNAMBIGUOUS_BP
X	71388236	71398737	5circ_000458	3	+	2	2	5	5	T01	3	0	0	1	GTAG	NA	ANCHOR_UNIQUE,CANONICAL,CIRCULAR,PERFECT_EXT,UNAMBIGUOUS_BP
19	49480297	49480620	5circ_000459	4	+	3	4	5	40	T01	4	0	0	1	GTAG	NA	ANCHOR_UNIQUE,CANONICAL,CIRCULAR,PERFECT_EXT,UNAMBIGUOUS_BP
7	128946032	128946470	5circ_000460	2	-	1	2	40	5	T01	2	2	0	1	GTAG	NA	ANCHOR_UNIQUE,CANONICAL,CIRCULAR,OK_EXT,UNAMBIGUOUS_BP
6	121090852	121106302	5circ_000461	2	-	1	2	5	5	T01	2	0	0	1	GTAG	NA	ANCHOR_UNIQUE,CANONICAL,CIRCULAR,PERFECT_EXT,UNAMBIGUOUS_BP
10	112058813	112148300	5circ_000462	2	-	2	2	40	40	T01	2	0	0	1	GTAG	NA	ANCHOR_UNIQUE,CANONICAL,CIRCULAR,PERFECT_EXT,UNAMBIGUOUS_BP
3	47498285	47504448	5circ_000463	2	-	1	2	5	35	T01	2	0	0	1	GTAG	NA	ANCHOR_UNIQUE,CANONICAL,CIRCULAR,PERFECT_EXT,UNAMBIGUOUS_BP
15	90084192	90091644	5circ_000465	2	-	2	2	40	40	T01	2	0	0	1	GTAG	NA	ANCHOR_UNIQUE,CANONICAL,CIRCULAR,PERFECT_EXT,UNAMBIGUOUS_BP
17	56908873	56909067	5circ_000466	4	-	2	4	5	40	T01	4	2	0	1	GTAG	NA	ANCHOR_UNIQUE,CANONICAL,CIRCULAR,OK_EXT,UNAMBIGUOUS_BP
3	58365873	58382700	5circ_000468	2	+	1	2	5	40	T01	2	0	0	1	GTAG	NA	ANCHOR_UNIQUE,CANONICAL,CIRCULAR,PERFECT_EXT,UNAMBIGUOUS_BP
16	50310686	50311786	5circ_000469	2	+	2	1	5	40	T01	2	0	0	1	GTAG	NA	ANCHOR_UNIQUE,CANONICAL,CIRCULAR,PERFECT_EXT,UNAMBIGUOUS_BP
4	1832743	1841797	5circ_000473	5	-	1	5	40	40	T01	5	0	0	1	GTAG	NA	ANCHOR_UNIQUE,CANONICAL,CIRCULAR,PERFECT_EXT,UNAMBIGUOUS_BP
15	90441505	90443478	5circ_000474	6	+	4	6	40	40	T01	6	0	0	1	GTAG	NA	ANCHOR_UNIQUE,CANONICAL,CIRCULAR,PERFECT_EXT,UNAMBIGUOUS_BP
15	41049934	41058778	5circ_000475	2	-	2	2	40	40	T01	2	0	0	1	GTAG	NA	ANCHOR_UNIQUE,CANONICAL,CIRCULAR,PERFECT_EXT,UNAMBIGUOUS_BP
16	71678754	71681905	5circ_000476	109	-	39	108	40	40	T01	109	0	0	1	GTAG	NA	ANCHOR_UNIQUE,CANONICAL,CIRCULAR,PERFECT_EXT,UNAMBIGUOUS_BP
8	140585118	140605914	5circ_000478	260	-	72	247	40	40	T01	260	0	0	1	GTAG	NA	ANCHOR_UNIQUE,CANONICAL,CIRCULAR,PERFECT_EXT,UNAMBIGUOUS_BP
12	62543096	62553174	5circ_000479	3	+	1	3	40	40	T01	3	0	0	1	GTAG	NA	ANCHOR_UNIQUE,CANONICAL,CIRCULAR,PERFECT_EXT,UNAMBIGUOUS_BP
9	110972072	111011690	5circ_000480	4	-	2	4	40	40	T01	4	0	0	1	GTAG	NA	ANCHOR_UNIQUE,CANONICAL,CIRCULAR,PERFECT_EXT,UNAMBIGUOUS_BP
4	150735257	150817257	5circ_000481	5	-	1	5	5	5	T01	5	0	0	1	GTAG	NA	ANCHOR_UNIQUE,CANONICAL,CIRCULAR,PERFECT_EXT,UNAMBIGUOUS_BP
9	127744563	127745099	5circ_000482	2	-	1	2	40	5	T01	2	0	0	1	GTAG	NA	ANCHOR_UNIQUE,CANONICAL,CIRCULAR,PERFECT_EXT,UNAMBIGUOUS_BP
10	68493131	68493570	5circ_000483	2	-	1	2	40	40	T01	2	0	0	1	GTAG	NA	ANCHOR_UNIQUE,CANONICAL,CIRCULAR,PERFECT_EXT,UNAMBIGUOUS_BP
14	52455323	52470680	5circ_000485	6	-	4	6	40	35	T01	6	0	0	1	GTAG	NA	ANCHOR_UNIQUE,CANONICAL,CIRCULAR,PERFECT_EXT,UNAMBIGUOUS_BP
10	68437010	68446413	5circ_000487	4	-	2	4	40	40	T01	4	0	0	1	GTAG	NA	ANCHOR_UNIQUE,CANONICAL,CIRCULAR,PERFECT_EXT,UNAMBIGUOUS_BP
X	40659226	40682996	5circ_000489	2	-	1	2	40	40	T01	2	0	0	1	GTAG	NA	ANCHOR_UNIQUE,CANONICAL,CIRCULAR,PERFECT_EXT,UNAMBIGUOUS_BP
14	20996208	20996711	5circ_000490	2	+	2	2	40	40	T01	2	0	0	1	GTAG	NA	ANCHOR_UNIQUE,CANONICAL,CIRCULAR,PERFECT_EXT,UNAMBIGUOUS_BP
9	128508875	128515639	5circ_000491	25	+	14	25	40	40	T01	25	0	0	1	GTAG	NA	ANCHOR_UNIQUE,CANONICAL,CIRCULAR,PERFECT_EXT,UNAMBIGUOUS_BP
20	34077027	34077245	5circ_000493	4	+	1	4	35	40	T01	4	0	0	1	GTAG	NA	ANCHOR_UNIQUE,CANONICAL,CIRCULAR,PERFECT_EXT,UNAMBIGUOUS_BP
9	86033281	86046572	5circ_000494	2	-	2	2	40	40	T01	2	0	0	1	GTAG	NA	ANCHOR_UNIQUE,CANONICAL,CIRCULAR,PERFECT_EXT,UNAMBIGUOUS_BP
6	28148315	28153099	5circ_000495	2	+	1	2	40	5	T01	2	0	0	1	GTAG	NA	ANCHOR_UNIQUE,CANONICAL,CIRCULAR,PERFECT_EXT,UNAMBIGUOUS_BP
20	2923206	2988474	5circ_000496	2	+	2	2	40	5	T01	2	0	0	1	GTAG	NA	ANCHOR_UNIQUE,CANONICAL,CIRCULAR,PERFECT_EXT,UNAMBIGUOUS_BP
22	21788256	21805945	5circ_000497	5	-	4	5	40	40	T01	5	0	0	1	GTAG	NA	ANCHOR_UNIQUE,CANONICAL,CIRCULAR,PERFECT_EXT,UNAMBIGUOUS_BP
19	8455404	8467584	5circ_000499	3	+	1	3	5	40	T01	3	0	0	1	GTAG	NA	ANCHOR_UNIQUE,CANONICAL,CIRCULAR,PERFECT_EXT,UNAMBIGUOUS_BP
19	18075748	18076327	5circ_000500	4	-	2	2	5	40	T01	4	1	0	1	GTAG	NA	ANCHOR_UNIQUE,CANONICAL,CIRCULAR,GOOD_EXT,UNAMBIGUOUS_BP
12	813641	862270	5circ_000501	2	+	1	2	35	40	T01	2	0	0	1	GTAG	NA	ANCHOR_UNIQUE,CANONICAL,CIRCULAR,PERFECT_EXT,UNAMBIGUOUS_BP
20	58418210	58441083	5circ_000502	2	+	1	2	40	40	T01	2	0	0	1	GTAG	NA	ANCHOR_UNIQUE,CANONICAL,CIRCULAR,PERFECT_EXT,UNAMBIGUOUS_BP
7	44700140	44701615	5circ_000503	4	+	2	4	40	40	T01	4	0	0	1	GTAG	NA	ANCHOR_UNIQUE,CANONICAL,CIRCULAR,PERFECT_EXT,UNAMBIGUOUS_BP
3	142425221	142426841	5circ_000505	8	-	5	8	40	40	T01	8	0	0	1	GTAG	NA	ANCHOR_UNIQUE,CANONICAL,CIRCULAR,PERFECT_EXT,UNAMBIGUOUS_BP
1	1561331	1564916	5circ_000507	2	-	2	2	40	5	T01	2	0	0	1	GTAG	NA	ANCHOR_UNIQUE,CANONICAL,CIRCULAR,PERFECT_EXT,UNAMBIGUOUS_BP
3	3152455	3174261	5circ_000508	2	-	1	2	40	40	T01	2	0	0	1	GTAG	NA	ANCHOR_UNIQUE,CANONICAL,CIRCULAR,PERFECT_EXT,UNAMBIGUOUS_BP
2	98639807	98644053	5circ_000510	7	-	2	7	40	40	T01	7	0	0	1	GTAG	NA	ANCHOR_UNIQUE,CANONICAL,CIRCULAR,PERFECT_EXT,UNAMBIGUOUS_BP
15	55320274	55321390	5circ_000511	4	+	2	4	40	40	T01	4	0	0	1	GTAG	NA	ANCHOR_UNIQUE,CANONICAL,CIRCULAR,PERFECT_EXT,UNAMBIGUOUS_BP
2	196139619	196146055	5circ_000512	21	-	13	18	40	40	T01	21	0	0	1	GTAG	NA	ANCHOR_UNIQUE,CANONICAL,CIRCULAR,PERFECT_EXT,UNAMBIGUOUS_BP
3	50113382	50114251	5circ_000513	6	+	2	6	40	40	T01	6	0	0	1	GTAG	NA	ANCHOR_UNIQUE,CANONICAL,CIRCULAR,PERFECT_EXT,UNAMBIGUOUS_BP
9	114341532	114342125	5circ_000514	2	-	1	2	5	40	T01	2	0	0	1	GTAG	NA	ANCHOR_UNIQUE,CANONICAL,CIRCULAR,PERFECT_EXT,UNAMBIGUOUS_BP
15	50289482	50309798	5circ_000515	3	-	1	3	40	40	T01	3	0	0	1	GTAG	NA	ANCHOR_UNIQUE,CANONICAL,CIRCULAR,PERFECT_EXT,UNAMBIGUOUS_BP
11	3735381	3739060	5circ_000516	2	-	2	1	5	5	T01	2	0	0	1	GTAG	NA	ANCHOR_UNIQUE,CANONICAL,CIRCULAR,PERFECT_EXT,UNAMBIGUOUS_BP
15	61954420	61982573	5circ_000517	11	-	2	11	5	40	T01	11	0	0	1	GTAG	NA	ANCHOR_UNIQUE,CANONICAL,CIRCULAR,PERFECT_EXT,UNAMBIGUOUS_BP
3	197858833	197866219	5circ_000518	3	+	2	3	5	35	T01	3	0	0	1	GTAG	NA	ANCHOR_UNIQUE,CANONICAL,CIRCULAR,PERFECT_EXT,UNAMBIGUOUS_BP
3	33046119	33058269	5circ_000519	2	-	2	2	40	40	T01	2	0	0	1	GTAG	NA	ANCHOR_UNIQUE,CANONICAL,CIRCULAR,PERFECT_EXT,UNAMBIGUOUS_BP
20	32093862	32099135	5circ_000521	17	+	4	17	40	40	T01	17	0	0	1	GTAG	NA	ANCHOR_UNIQUE,CANONICAL,CIRCULAR,PERFECT_EXT,UNAMBIGUOUS_BP
6	154801997	154810208	5circ_000522	4	+	1	4	35	4	T01	4	0	0	1	GTAG	NA	ANCHOR_UNIQUE,CANONICAL,CIRCULAR,PERFECT_EXT,UNAMBIGUOUS_BP
14	24116916	24119896	5circ_000524	4	+	3	4	40	40	T01	4	0	0	1	GTAG	NA	ANCHOR_UNIQUE,CANONICAL,CIRCULAR,PERFECT_EXT,UNAMBIGUOUS_BP
8	103420263	103421082	5circ_000525	3	+	2	2	5	40	T01	3	0	0	1	GTAG	NA	ANCHOR_UNIQUE,CANONICAL,CIRCULAR,PERFECT_EXT,UNAMBIGUOUS_BP
2	85043563	85049648	5circ_000526	11	+	5	11	40	40	T01	11	0	0	1	GTAG	NA	ANCHOR_UNIQUE,CANONICAL,CIRCULAR,PERFECT_EXT,UNAMBIGUOUS_BP
9	123533498	123557695	5circ_000527	5	-	1	5	40	5	T01	5	0	0	1	GTAG	NA	ANCHOR_UNIQUE,CANONICAL,CIRCULAR,PERFECT_EXT,UNAMBIGUOUS_BP
12	56644780	56645353	5circ_000528	2	-	2	2	5	40	T01	2	0	0	1	GTAG	NA	ANCHOR_UNIQUE,CANONICAL,CIRCULAR,PERFECT_EXT,UNAMBIGUOUS_BP
11	16178045	16186955	5circ_000530	19	-	9	19	40	40	T01	19	1	0	1	GTAG	NA	ANCHOR_UNIQUE,CANONICAL,CIRCULAR,GOOD_EXT,UNAMBIGUOUS_BP
17	59731420	59738947	5circ_000531	13	+	6	13	40	40	T01	13	0	0	1	GTAG	NA	ANCHOR_UNIQUE,CANONICAL,CIRCULAR,PERFECT_EXT,UNAMBIGUOUS_BP
2	201266460	201284950	5circ_000532	6	+	2	4	40	40	T01	6	0	0	1	GTAG	NA	ANCHOR_UNIQUE,CANONICAL,CIRCULAR,PERFECT_EXT,UNAMBIGUOUS_BP
14	89411390	89412490	5circ_000533	2	-	1	2	40	5	T01	2	2	0	1	GTAG	NA	ANCHOR_UNIQUE,CANONICAL,CIRCULAR,OK_EXT,UNAMBIGUOUS_BP
5	151458787	151467925	5circ_000535	5	+	2	4	40	40	T01	5	0	0	1	GTAG	NA	ANCHOR_UNIQUE,CANONICAL,CIRCULAR,PERFECT_EXT,UNAMBIGUOUS_BP
22	28296197	28306643	5circ_000536	3	-	1	3	40	40	T01	3	0	0	1	GTAG	NA	ANCHOR_UNIQUE,CANONICAL,CIRCULAR,PERFECT_EXT,UNAMBIGUOUS_BP
11	111836164	111838378	5circ_000537	8	-	4	8	40	40	T01	8	0	0	1	GTAG	NA	ANCHOR_UNIQUE,CANONICAL,CIRCULAR,PERFECT_EXT,UNAMBIGUOUS_BP
3	130963970	130975488	5circ_000538	4	+	2	4	40	40	T01	4	0	0	1	GTAG	NA	ANCHOR_UNIQUE,CANONICAL,CIRCULAR,PERFECT_EXT,UNAMBIGUOUS_BP
9	37126311	37127263	5circ_000539	7	+	4	6	40	40	T01	7	0	0	1	GTAG	NA	ANCHOR_UNIQUE,CANONICAL,CIRCULAR,PERFECT_EXT,UNAMBIGUOUS_BP
17	17509433	17512654	5circ_000543	2	-	1	2	40	40	T01	2	0	0	1	GTAG	NA	ANCHOR_UNIQUE,CANONICAL,CIRCULAR,PERFECT_EXT,UNAMBIGUOUS_BP
18	21564202	21568094	5circ_000544	4	-	2	4	40	40	T01	4	0	0	1	GTAG	NA	ANCHOR_UNIQUE,CANONICAL,CIRCULAR,PERFECT_EXT,UNAMBIGUOUS_BP
22	31551396	31575392	5circ_000545	3	+	1	3	5	5	T01	3	0	0	1	GTAG	NA	ANCHOR_UNIQUE,CANONICAL,CIRCULAR,PERFECT_EXT,UNAMBIGUOUS_BP
22	35403206	35423341	5circ_000547	17	+	5	17	40	40	T01	17	0	0	1	GTAG	NA	ANCHOR_UNIQUE,CANONICAL,CIRCULAR,PERFECT_EXT,UNAMBIGUOUS_BP
4	78872613	78878891	5circ_000549	5	+	2	4	40	5	T01	5	0	0	1	GTAG	NA	ANCHOR_UNIQUE,CANONICAL,CIRCULAR,PERFECT_EXT,UNAMBIGUOUS_BP
11	57420971	57425670	5circ_000550	2	-	1	2	40	40	T01	2	0	0	1	GTAG	NA	ANCHOR_UNIQUE,CANONICAL,CIRCULAR,PERFECT_EXT,UNAMBIGUOUS_BP
19	11120091	11120522	5circ_000551	3	+	2	3	40	40	T01	3	0	0	1	GTAG	NA	ANCHOR_UNIQUE,CANONICAL,CIRCULAR,PERFECT_EXT,UNAMBIGUOUS_BP
17	39424626	39432016	5circ_000553	2	-	1	2	40	35	T01	2	0	0	1	GTAG	NA	ANCHOR_UNIQUE,CANONICAL,CIRCULAR,PERFECT_EXT,UNAMBIGUOUS_BP
1	205187417	205187806	5circ_000554	12	-	2	12	40	40	T01	12	0	0	1	GTAG	NA	ANCHOR_UNIQUE,CANONICAL,CIRCULAR,PERFECT_EXT,UNAMBIGUOUS_BP
20	58999342	58999809	5circ_000555	5	-	1	5	5	5	T01	5	0	0	1	GTAG	NA	ANCHOR_UNIQUE,CANONICAL,CIRCULAR,PERFECT_EXT,UNAMBIGUOUS_BP
20	48726289	48745147	5circ_000558	3	-	1	3	40	40	T01	3	0	0	1	GTAG	NA	ANCHOR_UNIQUE,CANONICAL,CIRCULAR,PERFECT_EXT,UNAMBIGUOUS_BP
1	158678400	158685347	5circ_000559	7	-	4	7	40	40	T01	7	0	0	1	GTAG	NA	ANCHOR_UNIQUE,CANONICAL,CIRCULAR,PERFECT_EXT,UNAMBIGUOUS_BP
10	95397219	95410777	5circ_000562	2	-	2	2	40	40	T01	2	0	0	1	GTAG	NA	ANCHOR_UNIQUE,CANONICAL,CIRCULAR,PERFECT_EXT,UNAMBIGUOUS_BP
22	43039779	43046573	5circ_000563	22	-	14	22	40	40	T01	22	0	0	1	GTAG	NA	ANCHOR_UNIQUE,CANONICAL,CIRCULAR,PERFECT_EXT,UNAMBIGUOUS_BP
13	28197184	28221815	5circ_000564	4	+	1	4	40	40	T01	4	0	0	1	GTAG	NA	ANCHOR_UNIQUE,CANONICAL,CIRCULAR,PERFECT_EXT,UNAMBIGUOUS_BP
5	36953617	36962274	5circ_000565	14	+	7	14	40	40	T01	14	0	0	1	GTAG	NA	ANCHOR_UNIQUE,CANONICAL,CIRCULAR,PERFECT_EXT,UNAMBIGUOUS_BP
19	43545817	43551687	5circ_000566	2	-	1	2	40	35	T01	2	0	0	1	GTAG	NA	ANCHOR_UNIQUE,CANONICAL,CIRCULAR,PERFECT_EXT,UNAMBIGUOUS_BP
22	29094257	29142100	5circ_000568	7	+	2	7	40	40	T01	7	0	0	1	GTAG	NA	ANCHOR_UNIQUE,CANONICAL,CIRCULAR,PERFECT_EXT,UNAMBIGUOUS_BP
11	85996825	86031611	5circ_000570	71	-	31	71	40	40	T01	71	0	0	1	GTAG	NA	ANCHOR_UNIQUE,CANONICAL,CIRCULAR,PERFECT_EXT,UNAMBIGUOUS_BP
17	44083544	44083875	5circ_000571	2	-	2	2	40	40	T01	2	0	0	1	GTAG	NA	ANCHOR_UNIQUE,CANONICAL,CIRCULAR,PERFECT_EXT,UNAMBIGUOUS_BP
13	45988786	45989097	5circ_000572	4	-	2	4	40	40	T01	4	1	0	1	GTAG	NA	ANCHOR_UNIQUE,CANONICAL,CIRCULAR,GOOD_EXT,UNAMBIGUOUS_BP
16	88818006	88826838	5circ_000574	2	-	1	2	40	5	T01	2	0	0	1	GTAG	NA	ANCHOR_UNIQUE,CANONICAL,CIRCULAR,PERFECT_EXT,UNAMBIGUOUS_BP
4	139116648	139139497	5circ_000575	2	-	1	2	40	5	T01	2	0	0	1	GTAG	NA	ANCHOR_UNIQUE,CANONICAL,CIRCULAR,PERFECT_EXT,UNAMBIGUOUS_BP
19	17300855	17301624	5circ_000576	2	-	1	2	40	5	T01	2	2	0	1	GTAG	NA	ANCHOR_UNIQUE,CANONICAL,CIRCULAR,OK_EXT,UNAMBIGUOUS_BP
12	93097327	93098332	5circ_000577	2	+	2	2	40	5	T01	2	2	0	1	GTAG	NA	ANCHOR_UNIQUE,CANONICAL,CIRCULAR,OK_EXT,UNAMBIGUOUS_BP
10	87067725	87068157	5circ_000578	6	-	2	6	5	40	T01	6	0	0	1	GTAG	NA	ANCHOR_UNIQUE,CANONICAL,CIRCULAR,PERFECT_EXT,UNAMBIGUOUS_BP
2	218389869	218391495	5circ_000579	5	+	1	5	5	40	T01	5	1	0	1	GTAG	NA	ANCHOR_UNIQUE,CANONICAL,CIRCULAR,GOOD_EXT,UNAMBIGUOUS_BP
6	6248311	6266809	5circ_000581	4	-	2	4	40	40	T01	4	0	0	1	GTAG	NA	ANCHOR_UNIQUE,CANONICAL,CIRCULAR,PERFECT_EXT,UNAMBIGUOUS_BP
5	36953617	36995804	5circ_000585	4	+	2	4	40	5	T01	4	0	0	1	GTAG	NA	ANCHOR_UNIQUE,CANONICAL,CIRCULAR,PERFECT_EXT,UNAMBIGUOUS_BP
14	76166662	76195972	5circ_000587	2	+	2	2	35	40	T01	2	0	0	1	GTAG	NA	ANCHOR_UNIQUE,CANONICAL,CIRCULAR,PERFECT_EXT,UNAMBIGUOUS_BP
10	96944112	96949295	5circ_000588	3	+	1	3	40	40	T01	3	0	0	1	GTAG	NA	ANCHOR_UNIQUE,CANONICAL,CIRCULAR,PERFECT_EXT,UNAMBIGUOUS_BP
13	60444686	60467379	5circ_000589	2	+	1	2	5	5	T01	2	0	0	1	GTAG	NA	ANCHOR_UNIQUE,CANONICAL,CIRCULAR,PERFECT_EXT,UNAMBIGUOUS_BP
17	37570636	37585430	5circ_000590	2	-	1	2	40	40	T01	2	0	0	1	GTAG	NA	ANCHOR_UNIQUE,CANONICAL,CIRCULAR,PERFECT_EXT,UNAMBIGUOUS_BP
2	63433744	63439871	5circ_000591	2	-	1	2	40	5	T01	2	0	0	1	GTAG	NA	ANCHOR_UNIQUE,CANONICAL,CIRCULAR,PERFECT_EXT,UNAMBIGUOUS_BP
19	2137726	2138714	5circ_000592	8	-	6	8	40	40	T01	8	0	0	1	GTAG	NA	ANCHOR_UNIQUE,CANONICAL,CIRCULAR,PERFECT_EXT,UNAMBIGUOUS_BP
7	131463216	131470944	5circ_000593	4	+	1	4	5	5	T01	4	0	0	1	GTAG	NA	ANCHOR_UNIQUE,CANONICAL,CIRCULAR,PERFECT_EXT,UNAMBIGUOUS_BP
17	30858160	30869646	5circ_000594	6	+	2	6	5	40	T01	6	0	0	1	GTAG	NA	ANCHOR_UNIQUE,CANONICAL,CIRCULAR,PERFECT_EXT,UNAMBIGUOUS_BP
11	85996825	86001158	5circ_000595	24	-	11	24	40	40	T01	24	0	0	1	GTAG	NA	ANCHOR_UNIQUE,CANONICAL,CIRCULAR,PERFECT_EXT,UNAMBIGUOUS_BP
X	2243022	2291603	5circ_000596	2	-	2	2	40	40	T01	2	0	0	1	GTAG	NA	ANCHOR_UNIQUE,CANONICAL,CIRCULAR,PERFECT_EXT,UNAMBIGUOUS_BP
11	17122187	17132038	5circ_000597	3	-	1	3	40	5	T01	3	1	0	1	GTAG	NA	ANCHOR_UNIQUE,CANONICAL,CIRCULAR,GOOD_EXT,UNAMBIGUOUS_BP
3	47918718	47928350	5circ_000599	2	-	1	2	40	5	T01	2	0	0	1	GTAG	NA	ANCHOR_UNIQUE,CANONICAL,CIRCULAR,PERFECT_EXT,UNAMBIGUOUS_BP
13	28266717	28270866	5circ_000602	2	+	2	2	5	40	T01	2	0	0	1	GTAG	NA	ANCHOR_UNIQUE,CANONICAL,CIRCULAR,PERFECT_EXT,UNAMBIGUOUS_BP
17	18274794	18305220	5circ_000603	16	-	4	16	40	40	T01	16	0	0	1	GTAG	NA	ANCHOR_UNIQUE,CANONICAL,CIRCULAR,PERFECT_EXT,UNAMBIGUOUS_BP
4	1892165	1942565	5circ_000604	3	+	1	3	40	40	T01	3	0	0	1	GTAG	NA	ANCHOR_UNIQUE,CANONICAL,CIRCULAR,PERFECT_EXT,UNAMBIGUOUS_BP
11	121583457	121591156	5circ_000605	2	+	1	2	40	40	T01	2	0	0	1	GTAG	NA	ANCHOR_UNIQUE,CANONICAL,CIRCULAR,PERFECT_EXT,UNAMBIGUOUS_BP
11	46541944	46547296	5circ_000606	3	-	1	3	40	40	T01	3	0	0	1	GTAG	NA	ANCHOR_UNIQUE,CANONICAL,CIRCULAR,PERFECT_EXT,UNAMBIGUOUS_BP
7	92344977	92352642	5circ_000607	6	+	1	6	40	5	T01	6	0	0	1	GTAG	NA	ANCHOR_UNIQUE,CANONICAL,CIRCULAR,PERFECT_EXT,UNAMBIGUOUS_BP
1	44000766	44010882	5circ_000608	4	-	2	4	40	40	T01	4	0	0	1	GTAG	NA	ANCHOR_UNIQUE,CANONICAL,CIRCULAR,PERFECT_EXT,UNAMBIGUOUS_BP
2	128097428	128109746	5circ_000609	22	+	13	20	40	40	T01	22	0	0	1	GTAG	NA	ANCHOR_UNIQUE,CANONICAL,CIRCULAR,PERFECT_EXT,UNAMBIGUOUS_BP
15	63642956	63649925	5circ_000610	4	-	1	4	5	5	T01	4	0	0	1	GTAG	NA	ANCHOR_UNIQUE,CANONICAL,CIRCULAR,PERFECT_EXT,UNAMBIGUOUS_BP
19	19457006	19465614	5circ_000611	5	+	1	5	40	40	T01	5	0	0	1	GTAG	NA	ANCHOR_UNIQUE,CANONICAL,CIRCULAR,PERFECT_EXT,UNAMBIGUOUS_BP
13	41320666	41331369	5circ_000612	3	+	1	3	5	40	T01	3	0	0	1	GTAG	NA	ANCHOR_UNIQUE,CANONICAL,CIRCULAR,PERFECT_EXT,UNAMBIGUOUS_BP
16	14580873	14593378	5circ_000614	5	-	1	5	5	40	T01	5	0	0	1	GTAG	NA	ANCHOR_UNIQUE,CANONICAL,CIRCULAR,PERFECT_EXT,UNAMBIGUOUS_BP
19	47081512	47094608	5circ_000615	3	-	3	3	40	40	T01	3	0	0	1	GTAG	NA	ANCHOR_UNIQUE,CANONICAL,CIRCULAR,PERFECT_EXT,UNAMBIGUOUS_BP
7	8022482	8071131	5circ_000616	3	+	1	3	40	40	T01	3	0	0	1	GTAG	NA	ANCHOR_UNIQUE,CANONICAL,CIRCULAR,PERFECT_EXT,UNAMBIGUOUS_BP
3	49044389	49057890	5circ_000618	2	-	1	2	40	40	T01	2	0	0	1	GTAG	NA	ANCHOR_UNIQUE,CANONICAL,CIRCULAR,PERFECT_EXT,UNAMBIGUOUS_BP
6	131598286	131608071	5circ_000621	3	-	2	3	40	5	T01	3	0	0	1	GTAG	NA	ANCHOR_UNIQUE,CANONICAL,CIRCULAR,PERFECT_EXT,UNAMBIGUOUS_BP
16	31297513	31297954	5circ_000623	196	+	70	81	40	40	T01	196	0	0	1	GTAG	NA	ANCHOR_UNIQUE,CANONICAL,CIRCULAR,PERFECT_EXT,UNAMBIGUOUS_BP
18	13387340	13438384	5circ_000624	2	+	1	2	40	40	T01	2	0	0	1	GTAG	NA	ANCHOR_UNIQUE,CANONICAL,CIRCULAR,PERFECT_EXT,UNAMBIGUOUS_BP
11	85996825	86007583	5circ_000627	4	-	2	2	5	40	T01	4	0	0	1	GTAG	NA	ANCHOR_UNIQUE,CANONICAL,CIRCULAR,PERFECT_EXT,UNAMBIGUOUS_BP
11	35204511	35210054	5circ_000628	7	+	1	7	5	5	T01	7	0	0	1	GTAG	NA	ANCHOR_UNIQUE,CANONICAL,CIRCULAR,PERFECT_EXT,UNAMBIGUOUS_BP
X	110020351	110109146	5circ_000630	3	+	1	3	5	40	T01	3	0	0	1	GTAG	NA	ANCHOR_UNIQUE,CANONICAL,CIRCULAR,PERFECT_EXT,UNAMBIGUOUS_BP
6	35286324	35290382	5circ_000632	2	+	2	2	40	5	T01	2	0	0	1	GTAG	NA	ANCHOR_UNIQUE,CANONICAL,CIRCULAR,PERFECT_EXT,UNAMBIGUOUS_BP
9	33953284	33956146	5circ_000633	21	-	10	18	40	40	T01	21	0	0	1	GTAG	NA	ANCHOR_UNIQUE,CANONICAL,CIRCULAR,PERFECT_EXT,UNAMBIGUOUS_BP
16	4454810	4455780	5circ_000634	2	+	1	2	40	40	T01	2	0	0	1	GTAG	NA	ANCHOR_UNIQUE,CANONICAL,CIRCULAR,PERFECT_EXT,UNAMBIGUOUS_BP
17	16057513	16058599	5circ_000635	2	-	2	2	40	40	T01	2	0	0	1	GTAG	NA	ANCHOR_UNIQUE,CANONICAL,CIRCULAR,PERFECT_EXT,UNAMBIGUOUS_BP
6	63646618	63684626	5circ_000636	2	+	2	2	40	5	T01	2	0	0	1	GTAG	NA	ANCHOR_UNIQUE,CANONICAL,CIRCULAR,PERFECT_EXT,UNAMBIGUOUS_BP
22	29137341	29142100	5circ_000637	10	+	6	10	40	35	T01	10	0	0	1	GTAG	NA	ANCHOR_UNIQUE,CANONICAL,CIRCULAR,PERFECT_EXT,UNAMBIGUOUS_BP
4	39326562	39327756	5circ_000640	3	-	3	3	5	40	T01	3	0	0	1	GTAG	NA	ANCHOR_UNIQUE,CANONICAL,CIRCULAR,PERFECT_EXT,UNAMBIGUOUS_BP
19	16326030	16326825	5circ_000642	2	-	2	2	40	40	T01	2	2	0	1	GTAG	NA	ANCHOR_UNIQUE,CANONICAL,CIRCULAR,OK_EXT,UNAMBIGUOUS_BP
19	55245119	55245678	5circ_000643	8	-	2	8	40	40	T01	8	0	0	1	GTAG	NA	ANCHOR_UNIQUE,CANONICAL,CIRCULAR,PERFECT_EXT,UNAMBIGUOUS_BP
9	17330234	17342444	5circ_000644	3	+	1	3	5	5	T01	3	0	0	1	GTAG	NA	ANCHOR_UNIQUE,CANONICAL,CIRCULAR,PERFECT_EXT,UNAMBIGUOUS_BP
10	27117575	27148972	5circ_000645	2	-	1	2	5	5	T01	2	0	0	1	GTAG	NA	ANCHOR_UNIQUE,CANONICAL,CIRCULAR,PERFECT_EXT,UNAMBIGUOUS_BP
8	17950614	17953186	5circ_000646	3	+	1	3	40	5	T01	3	0	0	1	GTAG	NA	ANCHOR_UNIQUE,CANONICAL,CIRCULAR,PERFECT_EXT,UNAMBIGUOUS_BP
10	12081471	12087729	5circ_000647	3	+	1	3	5	40	T01	3	0	0	1	GTAG	NA	ANCHOR_UNIQUE,CANONICAL,CIRCULAR,PERFECT_EXT,UNAMBIGUOUS_BP
6	80319140	80353897	5circ_000649	2	+	1	2	5	4	T01	2	0	0	1	GTAG	NA	ANCHOR_UNIQUE,CANONICAL,CIRCULAR,PERFECT_EXT,UNAMBIGUOUS_BP
9	112250928	112252788	5circ_000651	27	-	14	27	40	40	T01	27	0	0	1	GTAG	NA	ANCHOR_UNIQUE,CANONICAL,CIRCULAR,PERFECT_EXT,UNAMBIGUOUS_BP
X	110067346	110109146	5circ_000653	2	+	1	2	5	40	T01	2	0	0	1	GTAG	NA	ANCHOR_UNIQUE,CANONICAL,CIRCULAR,PERFECT_EXT,UNAMBIGUOUS_BP
5	163443673	163444481	5circ_000655	2	+	2	2	40	40	T01	2	0	0	1	GTAG	NA	ANCHOR_UNIQUE,CANONICAL,CIRCULAR,PERFECT_EXT,UNAMBIGUOUS_BP
1	27303620	27306272	5circ_000656	5	+	1	5	40	35	T01	5	0	0	1	GTAG	NA	ANCHOR_UNIQUE,CANONICAL,CIRCULAR,PERFECT_EXT,UNAMBIGUOUS_BP
11	61313498	61316567	5circ_000657	3	-	3	3	40	40	T01	3	0	0	1	GTAG	NA	ANCHOR_UNIQUE,CANONICAL,CIRCULAR,PERFECT_EXT,UNAMBIGUOUS_BP
19	8541905	8544464	5circ_000658	8	-	4	8	40	40	T01	8	0	0	1	GTAG	NA	ANCHOR_UNIQUE,CANONICAL,CIRCULAR,PERFECT_EXT,UNAMBIGUOUS_BP
20	62284174	62286568	5circ_000659	2	+	1	2	40	40	T01	2	2	0	1	GTAG	NA	ANCHOR_UNIQUE,CANONICAL,CIRCULAR,OK_EXT,UNAMBIGUOUS_BP
3	148446265	148498970	5circ_000660	8	-	3	8	40	5	T01	8	0	0	1	GTAG	NA	ANCHOR_UNIQUE,CANONICAL,CIRCULAR,PERFECT_EXT,UNAMBIGUOUS_BP
9	86033281	86040868	5circ_000661	2	-	1	2	5	35	T01	2	0	0	1	GTAG	NA	ANCHOR_UNIQUE,CANONICAL,CIRCULAR,PERFECT_EXT,UNAMBIGUOUS_BP
5	109767534	109774965	5circ_000662	10	+	6	10	40	40	T01	10	0	0	1	GTAG	NA	ANCHOR_UNIQUE,CANONICAL,CIRCULAR,PERFECT_EXT,UNAMBIGUOUS_BP
4	48531247	48540068	5circ_000664	2	-	1	2	40	5	T01	2	0	0	1	GTAG	NA	ANCHOR_UNIQUE,CANONICAL,CIRCULAR,PERFECT_EXT,UNAMBIGUOUS_BP
X	130069299	130072417	5circ_000665	18	-	7	18	40	40	T01	18	0	0	1	GTAG	NA	ANCHOR_UNIQUE,CANONICAL,CIRCULAR,PERFECT_EXT,UNAMBIGUOUS_BP
2	65072280	65073016	5circ_000667	2	+	1	2	40	40	T01	2	2	0	1	GTAG	NA	ANCHOR_UNIQUE,CANONICAL,CIRCULAR,OK_EXT,UNAMBIGUOUS_BP
17	74695061	74698481	5circ_000668	2	-	1	2	5	35	T01	2	0	0	1	GTAG	NA	ANCHOR_UNIQUE,CANONICAL,CIRCULAR,PERFECT_EXT,UNAMBIGUOUS_BP
7	6425987	6436533	5circ_000669	2	-	1	2	5	5	T01	2	0	0	1	GTAG	NA	ANCHOR_UNIQUE,CANONICAL,CIRCULAR,PERFECT_EXT,UNAMBIGUOUS_BP
5	112275325	112307490	5circ_000670	13	-	6	13	40	40	T01	13	0	0	1	GTAG	NA	ANCHOR_UNIQUE,CANONICAL,CIRCULAR,PERFECT_EXT,UNAMBIGUOUS_BP
19	9828591	9828874	5circ_000671	13	+	3	13	5	40	T01	13	0	0	1	GTAG	NA	ANCHOR_UNIQUE,CANONICAL,CIRCULAR,PERFECT_EXT,UNAMBIGUOUS_BP
9	93002924	93006180	5circ_000672	2	+	2	1	35	40	T01	2	1	0	1	GTAG	NA	ANCHOR_UNIQUE,CANONICAL,CIRCULAR,GOOD_EXT,UNAMBIGUOUS_BP
2	226864967	226914351	5circ_000673	2	+	1	2	40	5	T01	2	0	0	1	GTAG	NA	ANCHOR_UNIQUE,CANONICAL,CIRCULAR,PERFECT_EXT,UNAMBIGUOUS_BP
5	73015625	73041739	5circ_000674	2	+	1	2	5	5	T01	2	0	0	1	GTAG	NA	ANCHOR_UNIQUE,CANONICAL,CIRCULAR,PERFECT_EXT,UNAMBIGUOUS_BP
10	50343491	50344345	5circ_000675	17	-	8	17	40	40	T01	17	0	0	1	GTAG	NA	ANCHOR_UNIQUE,CANONICAL,CIRCULAR,PERFECT_EXT,UNAMBIGUOUS_BP
12	112265877	112273795	5circ_000677	4	-	2	4	40	40	T01	4	0	0	1	GTAG	NA	ANCHOR_UNIQUE,CANONICAL,CIRCULAR,PERFECT_EXT,UNAMBIGUOUS_BP
9	36352741	36353331	5circ_000678	14	-	10	14	40	40	T01	14	0	0	1	GTAG	NA	ANCHOR_UNIQUE,CANONICAL,CIRCULAR,PERFECT_EXT,UNAMBIGUOUS_BP
8	11852609	11864463	5circ_000679	6	-	3	6	40	40	T01	6	0	0	1	GTAG	NA	ANCHOR_UNIQUE,CANONICAL,CIRCULAR,PERFECT_EXT,UNAMBIGUOUS_BP
14	96309452	96312159	5circ_000680	4	-	2	4	40	40	T01	4	0	0	1	GTAG	NA	ANCHOR_UNIQUE,CANONICAL,CIRCULAR,PERFECT_EXT,UNAMBIGUOUS_BP
1	185214613	185231708	5circ_000682	2	+	1	2	5	5	T01	2	0	0	1	GTAG	NA	ANCHOR_UNIQUE,CANONICAL,CIRCULAR,PERFECT_EXT,UNAMBIGUOUS_BP
1	10072027	10105744	5circ_000683	2	+	1	2	40	40	T01	2	0	0	1	GTAG	NA	ANCHOR_UNIQUE,CANONICAL,CIRCULAR,PERFECT_EXT,UNAMBIGUOUS_BP
3	123223558	123259589	5circ_000684	8	+	6	8	40	40	T01	8	0	0	1	GTAG	NA	ANCHOR_UNIQUE,CANONICAL,CIRCULAR,PERFECT_EXT,UNAMBIGUOUS_BP
9	33944364	33953474	5circ_000685	13	-	4	11	5	40	T01	13	0	0	1	GTAG	NA	ANCHOR_UNIQUE,CANONICAL,CIRCULAR,PERFECT_EXT,UNAMBIGUOUS_BP
1	154234590	154235291	5circ_000686	10	+	8	10	40	40	T01	10	0	0	1	GTAG	NA	ANCHOR_UNIQUE,CANONICAL,CIRCULAR,PERFECT_EXT,UNAMBIGUOUS_BP
16	70538322	70541834	5circ_000687	4	+	1	4	40	40	T01	4	0	0	1	GTAG	NA	ANCHOR_UNIQUE,CANONICAL,CIRCULAR,PERFECT_EXT,UNAMBIGUOUS_BP
X	129792327	129795675	5circ_000688	4	+	2	3	35	40	T01	4	0	0	1	GTAG	NA	ANCHOR_UNIQUE,CANONICAL,CIRCULAR,PERFECT_EXT,UNAMBIGUOUS_BP
13	114040999	114057474	5circ_000690	49	-	23	46	40	40	T01	49	0	0	1	GTAG	NA	ANCHOR_UNIQUE,CANONICAL,CIRCULAR,PERFECT_EXT,UNAMBIGUOUS_BP
17	78133405	78135009	5circ_000692	2	+	1	2	4	40	T01	2	0	0	1	GTAG	NA	ANCHOR_UNIQUE,CANONICAL,CIRCULAR,PERFECT_EXT,UNAMBIGUOUS_BP
9	132296886	132300803	5circ_000695	10	-	3	10	40	5	T01	10	0	0	1	GTAG	NA	ANCHOR_UNIQUE,CANONICAL,CIRCULAR,PERFECT_EXT,UNAMBIGUOUS_BP
17	47663088	47668410	5circ_000698	4	+	2	4	5	40	T01	4	0	0	1	GTAG	NA	ANCHOR_UNIQUE,CANONICAL,CIRCULAR,PERFECT_EXT,UNAMBIGUOUS_BP
4	48590658	48605833	5circ_000699	17	-	8	15	40	40	T01	17	0	0	1	GTAG	NA	ANCHOR_UNIQUE,CANONICAL,CIRCULAR,PERFECT_EXT,UNAMBIGUOUS_BP
7	107590277	107596002	5circ_000700	2	+	1	2	40	40	T01	2	0	0	1	GTAG	NA	ANCHOR_UNIQUE,CANONICAL,CIRCULAR,PERFECT_EXT,UNAMBIGUOUS_BP
20	58895611	58905480	5circ_000701	2	+	1	2	5	40	T01	2	0	0	1	GTAG	NA	ANCHOR_UNIQUE,CANONICAL,CIRCULAR,PERFECT_EXT,UNAMBIGUOUS_BP
19	16434364	16437865	5circ_000702	2	-	1	2	5	40	T01	2	0	0	1	GTAG	NA	ANCHOR_UNIQUE,CANONICAL,CIRCULAR,PERFECT_EXT,UNAMBIGUOUS_BP
11	46816197	46821248	5circ_000704	2	-	1	2	5	35	T01	2	0	0	1	GTAG	NA	ANCHOR_UNIQUE,CANONICAL,CIRCULAR,PERFECT_EXT,UNAMBIGUOUS_BP
6	121170404	121242339	5circ_000705	3	-	3	3	5	40	T01	3	0	0	1	GTAG	NA	ANCHOR_UNIQUE,CANONICAL,CIRCULAR,PERFECT_EXT,UNAMBIGUOUS_BP
4	127669035	127687867	5circ_000706	10	+	5	10	40	40	T01	10	0	0	1	GTAG	NA	ANCHOR_UNIQUE,CANONICAL,CIRCULAR,PERFECT_EXT,UNAMBIGUOUS_BP
5	151464513	151479489	5circ_000707	4	+	1	4	40	40	T01	4	0	0	1	GTAG	NA	ANCHOR_UNIQUE,CANONICAL,CIRCULAR,PERFECT_EXT,UNAMBIGUOUS_BP
3	12599690	12604289	5circ_000708	4	-	4	4	40	40	T01	4	0	0	1	GTAG	NA	ANCHOR_UNIQUE,CANONICAL,CIRCULAR,PERFECT_EXT,UNAMBIGUOUS_BP
3	15013588	15014174	5circ_000709	23	+	5	23	40	40	T01	23	0	0	1	GTAG	NA	ANCHOR_UNIQUE,CANONICAL,CIRCULAR,PERFECT_EXT,UNAMBIGUOUS_BP
16	15732484	15732950	5circ_000710	2	+	2	2	5	5	T01	2	1	0	1	GTAG	NA	ANCHOR_UNIQUE,CANONICAL,CIRCULAR,GOOD_EXT,UNAMBIGUOUS_BP
7	77778337	77780774	5circ_000711	3	+	1	3	40	40	T01	3	0	0	1	GTAG	NA	ANCHOR_UNIQUE,CANONICAL,CIRCULAR,PERFECT_EXT,UNAMBIGUOUS_BP
3	136326802	136328857	5circ_000712	4	+	2	4	5	5	T01	4	0	0	1	GTAG	NA	ANCHOR_UNIQUE,CANONICAL,CIRCULAR,PERFECT_EXT,UNAMBIGUOUS_BP
1	155670319	155675096	5circ_000713	9	-	5	4	5	35	T01	9	0	0	1	GTAG	NA	ANCHOR_UNIQUE,CANONICAL,CIRCULAR,PERFECT_EXT,UNAMBIGUOUS_BP
3	32441839	32452473	5circ_000714	7	+	2	4	40	40	T01	7	0	0	1	GTAG	NA	ANCHOR_UNIQUE,CANONICAL,CIRCULAR,PERFECT_EXT,UNAMBIGUOUS_BP
7	138525240	138554966	5circ_000715	2	+	2	2	40	40	T01	2	0	0	1	GTAG	NA	ANCHOR_UNIQUE,CANONICAL,CIRCULAR,PERFECT_EXT,UNAMBIGUOUS_BP
5	154026398	154034967	5circ_000716	3	-	3	3	5	40	T01	3	0	0	1	GTAG	NA	ANCHOR_UNIQUE,CANONICAL,CIRCULAR,PERFECT_EXT,UNAMBIGUOUS_BP
1	2238205	2239015	5circ_000717	2	+	1	2	5	40	T01	2	2	0	1	GTAG	NA	ANCHOR_UNIQUE,CANONICAL,CIRCULAR,OK_EXT,UNAMBIGUOUS_BP
5	73058432	73077493	5circ_000718	187	+	62	171	40	40	T01	187	0	0	1	GTAG	NA	ANCHOR_UNIQUE,CANONICAL,CIRCULAR,PERFECT_EXT,UNAMBIGUOUS_BP
12	98708584	98723764	5circ_000720	4	+	1	4	40	5	T01	4	0	0	1	GTAG	NA	ANCHOR_UNIQUE,CANONICAL,CIRCULAR,PERFECT_EXT,UNAMBIGUOUS_BP
14	30902535	30911162	5circ_000721	39	-	28	37	40	40	T01	39	0	0	1	GTAG	NA	ANCHOR_UNIQUE,CANONICAL,CIRCULAR,PERFECT_EXT,UNAMBIGUOUS_BP
6	149701778	149702266	5circ_000724	2	-	1	2	40	5	T01	2	0	0	1	GTAG	NA	ANCHOR_UNIQUE,CANONICAL,CIRCULAR,PERFECT_EXT,UNAMBIGUOUS_BP
12	1729972	1754514	5circ_000725	6	+	1	6	40	40	T01	6	0	0	1	GTAG	NA	ANCHOR_UNIQUE,CANONICAL,CIRCULAR,PERFECT_EXT,UNAMBIGUOUS_BP
2	61204496	61211929	5circ_000726	2	-	1	2	40	5	T01	2	0	0	1	GTAG	NA	ANCHOR_UNIQUE,CANONICAL,CIRCULAR,PERFECT_EXT,UNAMBIGUOUS_BP
1	2169517	2175313	5circ_000728	2	+	2	2	40	40	T01	2	0	0	1	GTAG	NA	ANCHOR_UNIQUE,CANONICAL,CIRCULAR,PERFECT_EXT,UNAMBIGUOUS_BP
4	89822245	89835692	5circ_000729	17	-	9	17	40	40	T01	17	0	0	1	GTAG	NA	ANCHOR_UNIQUE,CANONICAL,CIRCULAR,PERFECT_EXT,UNAMBIGUOUS_BP
10	14896845	14897517	5circ_000730	4	+	2	4	5	5	T01	4	0	0	1	GTAG	NA	ANCHOR_UNIQUE,CANONICAL,CIRCULAR,PERFECT_EXT,UNAMBIGUOUS_BP
8	90015540	90044995	5circ_000731	2	+	2	2	40	40	T01	2	0	0	1	GTAG	NA	ANCHOR_UNIQUE,CANONICAL,CIRCULAR,PERFECT_EXT,UNAMBIGUOUS_BP
1	151166933	151167414	5circ_000732	50	+	16	48	40	40	T01	50	0	0	1	GTAG	NA	ANCHOR_UNIQUE,CANONICAL,CIRCULAR,PERFECT_EXT,UNAMBIGUOUS_BP
2	32501712	32513154	5circ_000733	2	+	2	2	40	40	T01	2	0	0	1	GTAG	NA	ANCHOR_UNIQUE,CANONICAL,CIRCULAR,PERFECT_EXT,UNAMBIGUOUS_BP
17	78138348	78139240	5circ_000735	2	+	1	2	40	5	T01	2	0	0	1	GTAG	NA	ANCHOR_UNIQUE,CANONICAL,CIRCULAR,PERFECT_EXT,UNAMBIGUOUS_BP
10	179993	221356	5circ_000737	6	+	3	6	40	40	T01	6	0	0	1	GTAG	NA	ANCHOR_UNIQUE,CANONICAL,CIRCULAR,PERFECT_EXT,UNAMBIGUOUS_BP
2	181292604	181362918	5circ_000738	2	+	2	1	4	40	T01	2	0	0	1	GTAG	NA	ANCHOR_UNIQUE,CANONICAL,CIRCULAR,PERFECT_EXT,UNAMBIGUOUS_BP
6	111405469	111416472	5circ_000741	4	-	2	4	40	35	T01	4	0	0	1	GTAG	NA	ANCHOR_UNIQUE,CANONICAL,CIRCULAR,PERFECT_EXT,UNAMBIGUOUS_BP
11	128768117	128772985	5circ_000742	4	+	2	4	40	40	T01	4	0	0	1	GTAG	NA	ANCHOR_UNIQUE,CANONICAL,CIRCULAR,PERFECT_EXT,UNAMBIGUOUS_BP
20	45000391	45001353	5circ_000744	2	+	2	2	5	40	T01	2	0	0	1	GTAG	NA	ANCHOR_UNIQUE,CANONICAL,CIRCULAR,PERFECT_EXT,UNAMBIGUOUS_BP
5	37721114	37727045	5circ_000746	2	+	1	2	35	40	T01	2	0	0	1	GTAG	NA	ANCHOR_UNIQUE,CANONICAL,CIRCULAR,PERFECT_EXT,UNAMBIGUOUS_BP
20	49023050	49025481	5circ_000747	2	+	1	2	40	40	T01	2	0	0	1	GTAG	NA	ANCHOR_UNIQUE,CANONICAL,CIRCULAR,PERFECT_EXT,UNAMBIGUOUS_BP
7	80789305	80810701	5circ_000750	2	-	1	2	40	40	T01	2	0	0	1	GTAG	NA	ANCHOR_UNIQUE,CANONICAL,CIRCULAR,PERFECT_EXT,UNAMBIGUOUS_BP
12	132869618	132877654	5circ_000752	2	-	1	2	5	5	T01	2	0	0	1	GTAG	NA	ANCHOR_UNIQUE,CANONICAL,CIRCULAR,PERFECT_EXT,UNAMBIGUOUS_BP
14	72674239	72771893	5circ_000753	2	-	1	2	5	40	T01	2	0	0	1	GTAG	NA	ANCHOR_UNIQUE,CANONICAL,CIRCULAR,PERFECT_EXT,UNAMBIGUOUS_BP
4	6923372	6967424	5circ_000754	3	+	2	3	40	40	T01	3	0	0	1	GTAG	NA	ANCHOR_UNIQUE,CANONICAL,CIRCULAR,PERFECT_EXT,UNAMBIGUOUS_BP
3	126536270	126538713	5circ_000755	3	+	1	3	5	35	T01	3	0	1	1	GTAG	NA	ANCHOR_UNIQUE,CANONICAL,CIRCULAR,GOOD_EXT,UNAMBIGUOUS_BP
20	44506826	44510028	5circ_000756	2	-	1	2	5	5	T01	2	0	0	1	GTAG	NA	ANCHOR_UNIQUE,CANONICAL,CIRCULAR,PERFECT_EXT,UNAMBIGUOUS_BP
15	49225204	49292537	5circ_000757	9	+	4	9	40	40	T01	9	0	0	1	GTAG	NA	ANCHOR_UNIQUE,CANONICAL,CIRCULAR,PERFECT_EXT,UNAMBIGUOUS_BP
12	112203635	112204623	5circ_000758	10	-	5	10	40	40	T01	10	0	0	1	GTAG	NA	ANCHOR_UNIQUE,CANONICAL,CIRCULAR,PERFECT_EXT,UNAMBIGUOUS_BP
17	34983001	34983552	5circ_000759	2	+	2	2	40	40	T01	2	0	0	1	GTAG	NA	ANCHOR_UNIQUE,CANONICAL,CIRCULAR,PERFECT_EXT,UNAMBIGUOUS_BP
9	4841201	4860901	5circ_000760	3	+	1	3	5	5	T01	3	0	0	1	GTAG	NA	ANCHOR_UNIQUE,CANONICAL,CIRCULAR,PERFECT_EXT,UNAMBIGUOUS_BP
4	73120161	73125312	5circ_000762	3	-	1	3	5	40	T01	3	1	0	1	GTAG	NA	ANCHOR_UNIQUE,CANONICAL,CIRCULAR,GOOD_EXT,UNAMBIGUOUS_BP
4	78826036	78851056	5circ_000765	21	+	11	21	40	40	T01	21	0	0	1	GTAG	NA	ANCHOR_UNIQUE,CANONICAL,CIRCULAR,PERFECT_EXT,UNAMBIGUOUS_BP
22	44808306	44825593	5circ_000767	2	+	1	2	35	40	T01	2	0	0	1	GTAG	NA	ANCHOR_UNIQUE,CANONICAL,CIRCULAR,PERFECT_EXT,UNAMBIGUOUS_BP
5	14749171	14758598	5circ_000771	10	-	2	10	5	40	T01	10	0	0	1	GTAG	NA	ANCHOR_UNIQUE,CANONICAL,CIRCULAR,PERFECT_EXT,UNAMBIGUOUS_BP
2	97813970	97833426	5circ_000772	2	-	2	2	40	40	T01	2	0	0	1	GTAG	NA	ANCHOR_UNIQUE,CANONICAL,CIRCULAR,PERFECT_EXT,UNAMBIGUOUS_BP
20	62122468	62124780	5circ_000773	6	+	3	6	40	40	T01	6	0	0	1	GTAG	NA	ANCHOR_UNIQUE,CANONICAL,CIRCULAR,PERFECT_EXT,UNAMBIGUOUS_BP
16	31376798	31377265	5circ_000775	2	+	2	1	5	5	T01	2	0	0	1	GTAG	NA	ANCHOR_UNIQUE,CANONICAL,CIRCULAR,PERFECT_EXT,UNAMBIGUOUS_BP
1	212863707	212885396	5circ_000779	3	+	1	3	5	40	T01	3	0	0	1	GTAG	NA	ANCHOR_UNIQUE,CANONICAL,CIRCULAR,PERFECT_EXT,UNAMBIGUOUS_BP
2	240523884	240525849	5circ_000780	6	-	2	6	40	40	T01	6	0	0	1	GTAG	NA	ANCHOR_UNIQUE,CANONICAL,CIRCULAR,PERFECT_EXT,UNAMBIGUOUS_BP
2	8882510	8958642	5circ_000781	4	-	2	4	40	40	T01	4	0	0	1	GTAG	NA	ANCHOR_UNIQUE,CANONICAL,CIRCULAR,PERFECT_EXT,UNAMBIGUOUS_BP
2	241403827	241432612	5circ_000782	2	+	2	2	40	40	T01	2	0	0	1	GTAG	NA	ANCHOR_UNIQUE,CANONICAL,CIRCULAR,PERFECT_EXT,UNAMBIGUOUS_BP
X	110210114	110264599	5circ_000783	6	-	1	6	5	35	T01	6	0	0	1	GTAG	NA	ANCHOR_UNIQUE,CANONICAL,CIRCULAR,PERFECT_EXT,UNAMBIGUOUS_BP
17	5350450	5368468	5circ_000784	4	+	1	4	5	5	T01	4	0	0	1	GTAG	NA	ANCHOR_UNIQUE,CANONICAL,CIRCULAR,PERFECT_EXT,UNAMBIGUOUS_BP
7	66797373	66805396	5circ_000785	28	+	15	18	40	37	T01	28	0	0	1	GTAG	NA	ANCHOR_UNIQUE,CANONICAL,CIRCULAR,PERFECT_EXT,UNAMBIGUOUS_BP
12	101714089	101716812	5circ_000786	98	+	28	87	40	40	T01	98	0	0	1	GTAG	NA	ANCHOR_UNIQUE,CANONICAL,CIRCULAR,PERFECT_EXT,UNAMBIGUOUS_BP
19	54142925	54152999	5circ_000787	2	+	1	2	40	5	T01	2	0	0	1	GTAG	NA	ANCHOR_UNIQUE,CANONICAL,CIRCULAR,PERFECT_EXT,UNAMBIGUOUS_BP
7	6111124	6115523	5circ_000788	2	+	2	2	40	40	T01	2	0	0	1	GTAG	NA	ANCHOR_UNIQUE,CANONICAL,CIRCULAR,PERFECT_EXT,UNAMBIGUOUS_BP
5	43122038	43139309	5circ_000789	2	+	2	2	37	40	T01	2	0	0	1	GTAG	NA	ANCHOR_UNIQUE,CANONICAL,CIRCULAR,PERFECT_EXT,UNAMBIGUOUS_BP
15	94298200	94315637	5circ_000791	6	+	2	6	40	40	T01	6	0	0	1	GTAG	NA	ANCHOR_UNIQUE,CANONICAL,CIRCULAR,PERFECT_EXT,UNAMBIGUOUS_BP
11	68600340	68603492	5circ_000792	4	+	1	4	40	5	T01	4	0	0	1	GTAG	NA	ANCHOR_UNIQUE,CANONICAL,CIRCULAR,PERFECT_EXT,UNAMBIGUOUS_BP
9	36651745	36665581	5circ_000793	5	+	3	5	40	40	T01	5	0	0	1	GTAG	NA	ANCHOR_UNIQUE,CANONICAL,CIRCULAR,PERFECT_EXT,UNAMBIGUOUS_BP
1	8495062	8557523	5circ_000794	2	-	1	2	40	40	T01	2	0	0	1	GTAG	NA	ANCHOR_UNIQUE,CANONICAL,CIRCULAR,PERFECT_EXT,UNAMBIGUOUS_BP
12	70335437	70346324	5circ_000795	4	+	1	4	5	5	T01	4	0	0	1	GTAG	NA	ANCHOR_UNIQUE,CANONICAL,CIRCULAR,PERFECT_EXT,UNAMBIGUOUS_BP
2	85035015	85035847	5circ_000796	2	+	2	2	40	40	T01	2	0	0	1	GTAG	NA	ANCHOR_UNIQUE,CANONICAL,CIRCULAR,PERFECT_EXT,UNAMBIGUOUS_BP
1	185202653	185231708	5circ_000798	7	+	2	7	35	40	T01	7	0	0	1	GTAG	NA	ANCHOR_UNIQUE,CANONICAL,CIRCULAR,PERFECT_EXT,UNAMBIGUOUS_BP
22	42826939	42835493	5circ_000799	6	-	5	6	40	40	T01	6	0	0	1	GTAG	NA	ANCHOR_UNIQUE,CANONICAL,CIRCULAR,PERFECT_EXT,UNAMBIGUOUS_BP
15	63669537	63672694	5circ_000801	11	-	4	11	40	40	T01	11	0	0	1	GTAG	NA	ANCHOR_UNIQUE,CANONICAL,CIRCULAR,PERFECT_EXT,UNAMBIGUOUS_BP
8	41704040	41706241	5circ_000802	25	-	8	22	40	40	T01	25	0	0	1	GTAG	NA	ANCHOR_UNIQUE,CANONICAL,CIRCULAR,PERFECT_EXT,UNAMBIGUOUS_BP
1	187249306	187269508	5circ_000803	5	+	2	3	40	40	T01	5	0	0	1	GTAG	NA	ANCHOR_UNIQUE,CANONICAL,CIRCULAR,PERFECT_EXT,UNAMBIGUOUS_BP
14	65101612	65102303	5circ_000804	3	+	1	3	5	5	T01	3	1	0	1	GTAG	NA	ANCHOR_UNIQUE,CANONICAL,CIRCULAR,GOOD_EXT,UNAMBIGUOUS_BP
7	92517275	92518255	5circ_000805	4	-	4	4	40	40	T01	4	0	0	1	GTAG	NA	ANCHOR_UNIQUE,CANONICAL,CIRCULAR,PERFECT_EXT,UNAMBIGUOUS_BP
12	88148287	88176319	5circ_000806	25	+	8	17	40	40	T01	25	0	0	1	GTAG	NA	ANCHOR_UNIQUE,CANONICAL,CIRCULAR,PERFECT_EXT,UNAMBIGUOUS_BP
8	41693897	41714254	5circ_000807	5	-	2	5	40	40	T01	5	0	0	1	GTAG	NA	ANCHOR_UNIQUE,CANONICAL,CIRCULAR,PERFECT_EXT,UNAMBIGUOUS_BP
8	31147363	31157530	5circ_000809	6	+	2	6	40	40	T01	6	0	0	1	GTAG	NA	ANCHOR_UNIQUE,CANONICAL,CIRCULAR,PERFECT_EXT,UNAMBIGUOUS_BP
4	139125163	139168042	5circ_000810	3	-	1	3	40	5	T01	3	0	0	1	GTAG	NA	ANCHOR_UNIQUE,CANONICAL,CIRCULAR,PERFECT_EXT,UNAMBIGUOUS_BP
11	16177808	16186955	5circ_000811	2	-	1	2	5	40	T01	2	0	0	1	GTAG	NA	ANCHOR_UNIQUE,CANONICAL,CIRCULAR,PERFECT_EXT,UNAMBIGUOUS_BP
20	31782248	31797515	5circ_000812	8	+	6	8	40	40	T01	8	0	0	1	GTAG	NA	ANCHOR_UNIQUE,CANONICAL,CIRCULAR,PERFECT_EXT,UNAMBIGUOUS_BP
4	870710	884086	5circ_000813	4	-	2	4	40	40	T01	4	0	0	1	GTAG	NA	ANCHOR_UNIQUE,CANONICAL,CIRCULAR,PERFECT_EXT,UNAMBIGUOUS_BP
1	172555868	172557794	5circ_000815	39	+	21	35	40	40	T01	39	0	0	1	GTAG	NA	ANCHOR_UNIQUE,CANONICAL,CIRCULAR,PERFECT_EXT,UNAMBIGUOUS_BP
1	168022987	168068463	5circ_000818	2	+	1	2	35	5	T01	2	0	0	1	GTAG	NA	ANCHOR_UNIQUE,CANONICAL,CIRCULAR,PERFECT_EXT,UNAMBIGUOUS_BP
2	8770669	8778727	5circ_000819	2	-	1	2	40	40	T01	2	0	0	1	GTAG	NA	ANCHOR_UNIQUE,CANONICAL,CIRCULAR,PERFECT_EXT,UNAMBIGUOUS_BP
9	112250928	112262599	5circ_000820	6	-	5	6	40	40	T01	6	0	0	1	GTAG	NA	ANCHOR_UNIQUE,CANONICAL,CIRCULAR,PERFECT_EXT,UNAMBIGUOUS_BP
1	15630324	15643650	5circ_000821	6	+	2	6	40	40	T01	6	0	0	1	GTAG	NA	ANCHOR_UNIQUE,CANONICAL,CIRCULAR,PERFECT_EXT,UNAMBIGUOUS_BP
9	135881632	135883078	5circ_000822	103	-	36	82	40	40	T01	103	0	0	1	GTAG	NA	ANCHOR_UNIQUE,CANONICAL,CIRCULAR,PERFECT_EXT,UNAMBIGUOUS_BP
11	62723586	62724426	5circ_000823	5	-	3	5	40	40	T01	5	0	0	1	GTAG	NA	ANCHOR_UNIQUE,CANONICAL,CIRCULAR,PERFECT_EXT,UNAMBIGUOUS_BP
19	49599271	49599938	5circ_000824	5	+	2	5	5	40	T01	5	0	0	1	GTAG	NA	ANCHOR_UNIQUE,CANONICAL,CIRCULAR,PERFECT_EXT,UNAMBIGUOUS_BP
16	3739577	3745354	5circ_000825	3	-	2	3	5	40	T01	3	0	1	1	GTAG	NA	ANCHOR_UNIQUE,CANONICAL,CIRCULAR,GOOD_EXT,UNAMBIGUOUS_BP
6	18159882	18191381	5circ_000826	9	+	1	9	40	40	T01	9	0	0	1	GTAG	NA	ANCHOR_UNIQUE,CANONICAL,CIRCULAR,PERFECT_EXT,UNAMBIGUOUS_BP
12	109947255	109951316	5circ_000827	4	-	2	4	5	40	T01	4	0	0	1	GTAG	NA	ANCHOR_UNIQUE,CANONICAL,CIRCULAR,PERFECT_EXT,UNAMBIGUOUS_BP
14	99231344	99257836	5circ_000828	8	-	5	8	40	40	T01	8	0	0	1	GTAG	NA	ANCHOR_UNIQUE,CANONICAL,CIRCULAR,PERFECT_EXT,UNAMBIGUOUS_BP
13	98457167	98505053	5circ_000829	8	-	2	8	40	40	T01	8	0	0	1	GTAG	NA	ANCHOR_UNIQUE,CANONICAL,CIRCULAR,PERFECT_EXT,UNAMBIGUOUS_BP
1	44308309	44339322	5circ_000830	2	-	2	2	40	40	T01	2	0	0	1	GTAG	NA	ANCHOR_UNIQUE,CANONICAL,CIRCULAR,PERFECT_EXT,UNAMBIGUOUS_BP
7	135205927	135209755	5circ_000832	2	-	1	2	40	40	T01	2	0	0	1	GTAG	NA	ANCHOR_UNIQUE,CANONICAL,CIRCULAR,PERFECT_EXT,UNAMBIGUOUS_BP
1	9733400	9735174	5circ_000833	2	-	1	2	40	40	T01	2	1	0	1	GTAG	NA	ANCHOR_UNIQUE,CANONICAL,CIRCULAR,GOOD_EXT,UNAMBIGUOUS_BP
7	99416137	99420128	5circ_000835	2	+	1	2	40	40	T01	2	0	0	1	GTAG	NA	ANCHOR_UNIQUE,CANONICAL,CIRCULAR,PERFECT_EXT,UNAMBIGUOUS_BP
1	15630324	15649823	5circ_000836	4	+	1	4	5	40	T01	4	0	0	1	GTAG	NA	ANCHOR_UNIQUE,CANONICAL,CIRCULAR,PERFECT_EXT,UNAMBIGUOUS_BP
1	19156766	19160281	5circ_000837	4	-	2	4	40	40	T01	4	0	0	1	GTAG	NA	ANCHOR_UNIQUE,CANONICAL,CIRCULAR,PERFECT_EXT,UNAMBIGUOUS_BP
6	160397978	160410846	5circ_000838	2	+	2	2	35	40	T01	2	0	0	1	GTAG	NA	ANCHOR_UNIQUE,CANONICAL,CIRCULAR,PERFECT_EXT,UNAMBIGUOUS_BP
8	132836539	132844318	5circ_000839	4	+	2	4	5	40	T01	4	0	0	1	GTAG	NA	ANCHOR_UNIQUE,CANONICAL,CIRCULAR,PERFECT_EXT,UNAMBIGUOUS_BP
16	28954564	28959100	5circ_000840	2	+	2	2	40	40	T01	2	0	0	1	GTAG	NA	ANCHOR_UNIQUE,CANONICAL,CIRCULAR,PERFECT_EXT,UNAMBIGUOUS_BP
7	105062163	105081797	5circ_000841	8	+	4	8	40	40	T01	8	0	0	1	GTAG	NA	ANCHOR_UNIQUE,CANONICAL,CIRCULAR,PERFECT_EXT,UNAMBIGUOUS_BP
11	68759568	68761687	5circ_000842	7	-	4	7	40	40	T01	7	0	0	1	GTAG	NA	ANCHOR_UNIQUE,CANONICAL,CIRCULAR,PERFECT_EXT,UNAMBIGUOUS_BP
19	54187160	54188511	5circ_000843	6	-	1	6	5	40	T01	6	0	0	1	GTAG	NA	ANCHOR_UNIQUE,CANONICAL,CIRCULAR,PERFECT_EXT,UNAMBIGUOUS_BP
2	169530586	169544835	5circ_000844	2	-	1	2	5	40	T01	2	0	0	1	GTAG	NA	ANCHOR_UNIQUE,CANONICAL,CIRCULAR,PERFECT_EXT,UNAMBIGUOUS_BP
9	122313226	122322745	5circ_000845	4	+	3	4	40	35	T01	4	0	0	1	GTAG	NA	ANCHOR_UNIQUE,CANONICAL,CIRCULAR,PERFECT_EXT,UNAMBIGUOUS_BP
14	99458278	99465809	5circ_000847	3	-	1	3	40	40	T01	3	0	0	1	GTAG	NA	ANCHOR_UNIQUE,CANONICAL,CIRCULAR,PERFECT_EXT,UNAMBIGUOUS_BP
15	50300788	50304133	5circ_000848	24	-	11	24	40	40	T01	24	0	0	1	GTAG	NA	ANCHOR_UNIQUE,CANONICAL,CIRCULAR,PERFECT_EXT,UNAMBIGUOUS_BP
17	28917284	28921808	5circ_000849	4	-	2	4	40	40	T01	4	0	0	1	GTAG	NA	ANCHOR_UNIQUE,CANONICAL,CIRCULAR,PERFECT_EXT,UNAMBIGUOUS_BP
2	61190270	61214694	5circ_000850	8	-	2	8	40	40	T01	8	0	0	1	GTAG	NA	ANCHOR_UNIQUE,CANONICAL,CIRCULAR,PERFECT_EXT,UNAMBIGUOUS_BP
18	47841850	47870564	5circ_000851	3	-	1	3	40	40	T01	3	0	0	1	GTAG	NA	ANCHOR_UNIQUE,CANONICAL,CIRCULAR,PERFECT_EXT,UNAMBIGUOUS_BP
14	54399893	54411706	5circ_000852	6	+	2	6	40	5	T01	6	0	0	1	GTAG	NA	ANCHOR_UNIQUE,CANONICAL,CIRCULAR,PERFECT_EXT,UNAMBIGUOUS_BP
21	46416068	46422124	5circ_000853	4	+	2	2	40	40	T01	4	0	0	1	GTAG	NA	ANCHOR_UNIQUE,CANONICAL,CIRCULAR,PERFECT_EXT,UNAMBIGUOUS_BP
X	41217219	41223402	5circ_000854	4	+	2	4	40	40	T01	4	0	0	1	GTAG	NA	ANCHOR_UNIQUE,CANONICAL,CIRCULAR,PERFECT_EXT,UNAMBIGUOUS_BP
6	31271232	31356326	5circ_000855	43	+	15	20	37	35	T01	43	2	0	1	GTAG	NA	ANCHOR_UNIQUE,CANONICAL,CIRCULAR,OK_EXT,UNAMBIGUOUS_BP
20	25020009	25023641	5circ_000857	2	-	1	2	40	40	T01	2	0	0	1	GTAG	NA	ANCHOR_UNIQUE,CANONICAL,CIRCULAR,PERFECT_EXT,UNAMBIGUOUS_BP
5	14600964	14602332	5circ_000858	2	+	2	1	40	5	T01	2	0	0	1	GTAG	NA	ANCHOR_UNIQUE,CANONICAL,CIRCULAR,PERFECT_EXT,UNAMBIGUOUS_BP
1	15626668	15643650	5circ_000859	8	+	5	8	40	40	T01	8	0	0	1	GTAG	NA	ANCHOR_UNIQUE,CANONICAL,CIRCULAR,PERFECT_EXT,UNAMBIGUOUS_BP
7	44624316	44647534	5circ_000860	2	+	1	2	40	40	T01	2	0	0	1	GTAG	NA	ANCHOR_UNIQUE,CANONICAL,CIRCULAR,PERFECT_EXT,UNAMBIGUOUS_BP
1	117626659	117626958	5circ_000861	2	-	1	2	5	5	T01	2	0	0	1	GTAG	NA	ANCHOR_UNIQUE,CANONICAL,CIRCULAR,PERFECT_EXT,UNAMBIGUOUS_BP
6	159682473	159688242	5circ_000862	13	-	7	13	40	40	T01	13	0	0	1	GTAG	NA	ANCHOR_UNIQUE,CANONICAL,CIRCULAR,PERFECT_EXT,UNAMBIGUOUS_BP
21	33432176	33432871	5circ_000863	57	+	21	57	40	40	T01	57	0	0	1	GTAG	NA	ANCHOR_UNIQUE,CANONICAL,CIRCULAR,PERFECT_EXT,UNAMBIGUOUS_BP
1	28035543	28058094	5circ_000864	11	-	6	11	40	40	T01	11	0	0	1	GTAG	NA	ANCHOR_UNIQUE,CANONICAL,CIRCULAR,PERFECT_EXT,UNAMBIGUOUS_BP
20	49151581	49166285	5circ_000866	4	-	2	4	40	5	T01	4	0	0	1	GTAG	NA	ANCHOR_UNIQUE,CANONICAL,CIRCULAR,PERFECT_EXT,UNAMBIGUOUS_BP
1	15529087	15567269	5circ_000868	2	+	1	2	5	5	T01	2	0	0	1	GTAG	NA	ANCHOR_UNIQUE,CANONICAL,CIRCULAR,PERFECT_EXT,UNAMBIGUOUS_BP
10	124942456	124962408	5circ_000870	26	+	7	26	40	40	T01	26	0	0	1	GTAG	NA	ANCHOR_UNIQUE,CANONICAL,CIRCULAR,PERFECT_EXT,UNAMBIGUOUS_BP
21	44086801	44094233	5circ_000871	3	+	2	3	5	40	T01	3	0	0	1	GTAG	NA	ANCHOR_UNIQUE,CANONICAL,CIRCULAR,PERFECT_EXT,UNAMBIGUOUS_BP
1	99993536	100015420	5circ_000872	2	+	2	2	40	5	T01	2	0	0	1	GTAG	NA	ANCHOR_UNIQUE,CANONICAL,CIRCULAR,PERFECT_EXT,UNAMBIGUOUS_BP
2	15461200	15511350	5circ_000874	5	-	3	5	40	40	T01	5	0	0	1	GTAG	NA	ANCHOR_UNIQUE,CANONICAL,CIRCULAR,PERFECT_EXT,UNAMBIGUOUS_BP
3	197866111	197871462	5circ_000875	16	+	13	16	40	40	T01	16	0	0	1	GTAG	NA	ANCHOR_UNIQUE,CANONICAL,CIRCULAR,PERFECT_EXT,UNAMBIGUOUS_BP
5	95748335	95768166	5circ_000876	4	+	2	4	40	40	T01	4	0	0	1	GTAG	NA	ANCHOR_UNIQUE,CANONICAL,CIRCULAR,PERFECT_EXT,UNAMBIGUOUS_BP
1	234463836	234467650	5circ_000877	2	-	1	2	40	40	T01	2	0	0	1	GTAG	NA	ANCHOR_UNIQUE,CANONICAL,CIRCULAR,PERFECT_EXT,UNAMBIGUOUS_BP
15	49027364	49037769	5circ_000879	5	-	3	4	40	40	T01	5	0	0	1	GTAG	NA	ANCHOR_UNIQUE,CANONICAL,CIRCULAR,PERFECT_EXT,UNAMBIGUOUS_BP
20	45948902	45950069	5circ_000880	2	-	1	2	40	5	T01	2	0	0	1	GTAG	NA	ANCHOR_UNIQUE,CANONICAL,CIRCULAR,PERFECT_EXT,UNAMBIGUOUS_BP
6	3286858	3298218	5circ_000881	9	-	3	9	40	40	T01	9	1	0	1	GTAG	NA	ANCHOR_UNIQUE,CANONICAL,CIRCULAR,GOOD_EXT,UNAMBIGUOUS_BP
9	109080838	109108570	5circ_000882	5	-	2	5	40	40	T01	5	0	0	1	GTAG	NA	ANCHOR_UNIQUE,CANONICAL,CIRCULAR,PERFECT_EXT,UNAMBIGUOUS_BP
5	43295751	43297166	5circ_000887	6	-	6	6	40	40	T01	6	0	0	1	GTAG	NA	ANCHOR_UNIQUE,CANONICAL,CIRCULAR,PERFECT_EXT,UNAMBIGUOUS_BP
5	109755328	109774965	5circ_000888	2	+	1	2	40	4	T01	2	0	0	1	GTAG	NA	ANCHOR_UNIQUE,CANONICAL,CIRCULAR,PERFECT_EXT,UNAMBIGUOUS_BP
13	28256291	28280541	5circ_000889	3	+	1	3	40	5	T01	3	0	0	1	GTAG	NA	ANCHOR_UNIQUE,CANONICAL,CIRCULAR,PERFECT_EXT,UNAMBIGUOUS_BP
1	51408134	51448135	5circ_000890	4	-	1	4	5	5	T01	4	0	0	1	GTAG	NA	ANCHOR_UNIQUE,CANONICAL,CIRCULAR,PERFECT_EXT,UNAMBIGUOUS_BP
12	89457088	89472275	5circ_000891	5	-	3	5	40	5	T01	5	0	0	1	GTAG	NA	ANCHOR_UNIQUE,CANONICAL,CIRCULAR,PERFECT_EXT,UNAMBIGUOUS_BP
X	41218371	41223402	5circ_000892	8	+	4	7	40	40	T01	8	0	0	1	GTAG	NA	ANCHOR_UNIQUE,CANONICAL,CIRCULAR,PERFECT_EXT,UNAMBIGUOUS_BP
13	111205288	111233293	5circ_000893	4	+	1	4	40	40	T01	4	0	0	1	GTAG	NA	ANCHOR_UNIQUE,CANONICAL,CIRCULAR,PERFECT_EXT,UNAMBIGUOUS_BP
1	161791407	161792327	5circ_000894	6	+	6	6	40	40	T01	6	0	0	1	GTAG	NA	ANCHOR_UNIQUE,CANONICAL,CIRCULAR,PERFECT_EXT,UNAMBIGUOUS_BP
3	5192269	5217359	5circ_000896	2	+	1	2	5	40	T01	2	1	0	1	GTAG	NA	ANCHOR_UNIQUE,CANONICAL,CIRCULAR,GOOD_EXT,UNAMBIGUOUS_BP
1	228394736	228395252	5circ_000897	19	-	5	19	40	40	T01	19	0	0	1	GTAG	NA	ANCHOR_UNIQUE,CANONICAL,CIRCULAR,PERFECT_EXT,UNAMBIGUOUS_BP
11	68803999	68812576	5circ_000898	4	-	2	4	40	40	T01	4	0	0	1	GTAG	NA	ANCHOR_UNIQUE,CANONICAL,CIRCULAR,PERFECT_EXT,UNAMBIGUOUS_BP
1	37880084	37891454	5circ_000899	2	-	2	2	40	40	T01	2	0	0	1	GTAG	NA	ANCHOR_UNIQUE,CANONICAL,CIRCULAR,PERFECT_EXT,UNAMBIGUOUS_BP
6	98899267	98934879	5circ_000900	12	-	7	12	40	40	T01	12	0	0	1	GTAG	NA	ANCHOR_UNIQUE,CANONICAL,CIRCULAR,PERFECT_EXT,UNAMBIGUOUS_BP
8	38114191	38121149	5circ_000901	6	+	3	6	40	40	T01	6	0	0	1	GTAG	NA	ANCHOR_UNIQUE,CANONICAL,CIRCULAR,PERFECT_EXT,UNAMBIGUOUS_BP
2	64572945	64585545	5circ_000902	15	+	4	15	40	40	T01	15	0	0	1	GTAG	NA	ANCHOR_UNIQUE,CANONICAL,CIRCULAR,PERFECT_EXT,UNAMBIGUOUS_BP
3	71710411	71728623	5circ_000903	10	-	3	10	40	40	T01	10	0	0	1	GTAG	NA	ANCHOR_UNIQUE,CANONICAL,CIRCULAR,PERFECT_EXT,UNAMBIGUOUS_BP
16	3254157	3254790	5circ_000904	2	-	1	2	40	40	T01	2	0	0	1	GTAG	NA	ANCHOR_UNIQUE,CANONICAL,CIRCULAR,PERFECT_EXT,UNAMBIGUOUS_BP
1	169798856	169807929	5circ_000905	3	+	2	1	5	5	T01	3	1	0	1	GTAG	NA	ANCHOR_UNIQUE,CANONICAL,CIRCULAR,GOOD_EXT,UNAMBIGUOUS_BP
7	96277195	96309691	5circ_000906	20	-	5	20	40	40	T01	20	0	0	1	GTAG	NA	ANCHOR_UNIQUE,CANONICAL,CIRCULAR,PERFECT_EXT,UNAMBIGUOUS_BP
5	172905322	172905569	5circ_000907	3	-	2	3	40	5	T01	3	1	0	1	GTAG	NA	ANCHOR_UNIQUE,CANONICAL,CIRCULAR,GOOD_EXT,UNAMBIGUOUS_BP
16	18849216	18850467	5circ_000909	2	-	1	2	40	40	T01	2	0	0	1	GTAG	NA	ANCHOR_UNIQUE,CANONICAL,CIRCULAR,PERFECT_EXT,UNAMBIGUOUS_BP
3	52403137	52404586	5circ_000910	2	-	1	2	40	40	T01	2	0	0	1	GTAG	NA	ANCHOR_UNIQUE,CANONICAL,CIRCULAR,PERFECT_EXT,UNAMBIGUOUS_BP
13	110647100	110705571	5circ_000913	3	-	1	3	40	40	T01	3	0	0	1	GTAG	NA	ANCHOR_UNIQUE,CANONICAL,CIRCULAR,PERFECT_EXT,UNAMBIGUOUS_BP
8	9744831	9748212	5circ_000914	4	+	1	4	35	40	T01	4	0	0	1	GTAG	NA	ANCHOR_UNIQUE,CANONICAL,CIRCULAR,PERFECT_EXT,UNAMBIGUOUS_BP
9	83663874	83678599	5circ_000915	6	-	2	6	35	40	T01	6	0	0	1	GTAG	NA	ANCHOR_UNIQUE,CANONICAL,CIRCULAR,PERFECT_EXT,UNAMBIGUOUS_BP
16	57017073	57021007	5circ_000918	9	+	5	9	40	40	T01	9	0	0	1	GTAG	NA	ANCHOR_UNIQUE,CANONICAL,CIRCULAR,PERFECT_EXT,UNAMBIGUOUS_BP
22	28699837	28734727	5circ_000919	10	-	3	10	40	40	T01	10	0	0	1	GTAG	NA	ANCHOR_UNIQUE,CANONICAL,CIRCULAR,PERFECT_EXT,UNAMBIGUOUS_BP
1	229530198	229542371	5circ_000920	6	-	4	2	5	40	T01	6	0	0	1	GTAG	NA	ANCHOR_UNIQUE,CANONICAL,CIRCULAR,PERFECT_EXT,UNAMBIGUOUS_BP
7	129657342	129690546	5circ_000922	8	+	2	8	40	40	T01	8	0	0	1	GTAG	NA	ANCHOR_UNIQUE,CANONICAL,CIRCULAR,PERFECT_EXT,UNAMBIGUOUS_BP
2	240005209	240022340	5circ_000923	2	-	1	2	40	5	T01	2	1	0	1	GTAG	NA	ANCHOR_UNIQUE,CANONICAL,CIRCULAR,GOOD_EXT,UNAMBIGUOUS_BP
7	22964414	23014039	5circ_000924	3	-	1	3	5	5	T01	3	0	0	1	GTAG	NA	ANCHOR_UNIQUE,CANONICAL,CIRCULAR,PERFECT_EXT,UNAMBIGUOUS_BP
10	101792838	101810314	5circ_000926	6	-	2	6	5	40	T01	6	0	0	1	GTAG	NA	ANCHOR_UNIQUE,CANONICAL,CIRCULAR,PERFECT_EXT,UNAMBIGUOUS_BP
19	39915184	39915789	5circ_000927	4	-	1	4	40	40	T01	4	0	0	1	GTAG	NA	ANCHOR_UNIQUE,CANONICAL,CIRCULAR,PERFECT_EXT,UNAMBIGUOUS_BP
17	81270524	81271024	5circ_000928	4	-	3	4	5	40	T01	4	0	0	1	GTAG	NA	ANCHOR_UNIQUE,CANONICAL,CIRCULAR,PERFECT_EXT,UNAMBIGUOUS_BP
19	3656404	3662001	5circ_000930	30	-	9	30	40	40	T01	30	0	0	1	GTAG	NA	ANCHOR_UNIQUE,CANONICAL,CIRCULAR,PERFECT_EXT,UNAMBIGUOUS_BP
12	112239051	112247076	5circ_000933	3	-	2	3	40	5	T01	3	0	0	1	GTAG	NA	ANCHOR_UNIQUE,CANONICAL,CIRCULAR,PERFECT_EXT,UNAMBIGUOUS_BP
5	138006989	138021197	5circ_000934	2	-	1	2	40	40	T01	2	0	0	1	GTAG	NA	ANCHOR_UNIQUE,CANONICAL,CIRCULAR,PERFECT_EXT,UNAMBIGUOUS_BP
6	43055896	43056445	5circ_000935	2	-	1	2	40	40	T01	2	0	0	1	GTAG	NA	ANCHOR_UNIQUE,CANONICAL,CIRCULAR,PERFECT_EXT,UNAMBIGUOUS_BP
20	44479967	44490111	5circ_000936	6	+	2	6	40	5	T01	6	0	0	1	GTAG	NA	ANCHOR_UNIQUE,CANONICAL,CIRCULAR,PERFECT_EXT,UNAMBIGUOUS_BP
2	33186855	33222151	5circ_000937	6	+	4	6	40	40	T01	6	0	0	1	GTAG	NA	ANCHOR_UNIQUE,CANONICAL,CIRCULAR,PERFECT_EXT,UNAMBIGUOUS_BP
9	94773001	94792918	5circ_000939	2	+	1	2	40	5	T01	2	0	0	1	GTAG	NA	ANCHOR_UNIQUE,CANONICAL,CIRCULAR,PERFECT_EXT,UNAMBIGUOUS_BP
22	21769194	21845931	5circ_000941	2	-	1	2	40	4	T01	2	0	0	1	GTAG	NA	ANCHOR_UNIQUE,CANONICAL,CIRCULAR,PERFECT_EXT,UNAMBIGUOUS_BP
7	152309965	152315338	5circ_000943	7	-	5	7	40	40	T01	7	0	0	1	GTAG	NA	ANCHOR_UNIQUE,CANONICAL,CIRCULAR,PERFECT_EXT,UNAMBIGUOUS_BP
3	20111595	20127549	5circ_000945	2	+	2	2	40	40	T01	2	0	0	1	GTAG	NA	ANCHOR_UNIQUE,CANONICAL,CIRCULAR,PERFECT_EXT,UNAMBIGUOUS_BP
14	34783761	34792921	5circ_000946	2	-	2	2	40	40	T01	2	0	0	1	GTAG	NA	ANCHOR_UNIQUE,CANONICAL,CIRCULAR,PERFECT_EXT,UNAMBIGUOUS_BP
4	82939538	82946474	5circ_000948	2	-	1	2	5	5	T01	2	0	0	1	GTAG	NA	ANCHOR_UNIQUE,CANONICAL,CIRCULAR,PERFECT_EXT,UNAMBIGUOUS_BP
17	5399551	5414134	5circ_000950	16	-	5	13	40	40	T01	16	0	0	1	GTAG	NA	ANCHOR_UNIQUE,CANONICAL,CIRCULAR,PERFECT_EXT,UNAMBIGUOUS_BP
19	17724208	17725028	5circ_000951	2	+	2	1	2	40	T01	2	1	0	1	GTAG	NA	ANCHOR_UNIQUE,CANONICAL,CIRCULAR,GOOD_EXT,UNAMBIGUOUS_BP
X	102825992	102865152	5circ_000952	2	+	1	2	5	5	T01	2	0	0	1	GTAG	NA	ANCHOR_UNIQUE,CANONICAL,CIRCULAR,PERFECT_EXT,UNAMBIGUOUS_BP
10	124088283	124091297	5circ_000953	2	-	1	2	40	5	T01	2	2	0	1	GTAG	NA	ANCHOR_UNIQUE,CANONICAL,CIRCULAR,OK_EXT,UNAMBIGUOUS_BP
9	19286768	19305527	5circ_000954	5	+	3	5	40	40	T01	5	0	0	1	GTAG	NA	ANCHOR_UNIQUE,CANONICAL,CIRCULAR,PERFECT_EXT,UNAMBIGUOUS_BP
8	134509618	134521001	5circ_000956	3	-	2	3	40	40	T01	3	0	0	1	GTAG	NA	ANCHOR_UNIQUE,CANONICAL,CIRCULAR,PERFECT_EXT,UNAMBIGUOUS_BP
11	34082824	34090678	5circ_000957	3	+	1	3	40	5	T01	3	0	0	1	GTAG	NA	ANCHOR_UNIQUE,CANONICAL,CIRCULAR,PERFECT_EXT,UNAMBIGUOUS_BP
2	201344169	201351451	5circ_000958	24	-	13	24	5	40	T01	24	0	0	1	GTAG	NA	ANCHOR_UNIQUE,CANONICAL,CIRCULAR,PERFECT_EXT,UNAMBIGUOUS_BP
1	109336239	109345878	5circ_000959	3	-	1	3	40	5	T01	3	0	0	1	GTAG	NA	ANCHOR_UNIQUE,CANONICAL,CIRCULAR,PERFECT_EXT,UNAMBIGUOUS_BP
5	73058437	73077493	5circ_000960	17	+	6	15	40	40	T01	17	0	0	1	GTAG	NA	ANCHOR_UNIQUE,CANONICAL,CIRCULAR,PERFECT_EXT,UNAMBIGUOUS_BP
13	45516142	45525051	5circ_000961	2	+	2	1	5	40	T01	2	0	0	1	GTAG	NA	ANCHOR_UNIQUE,CANONICAL,CIRCULAR,PERFECT_EXT,UNAMBIGUOUS_BP
10	62388395	62451874	5circ_000962	2	+	2	2	40	40	T01	2	0	0	1	GTAG	NA	ANCHOR_UNIQUE,CANONICAL,CIRCULAR,PERFECT_EXT,UNAMBIGUOUS_BP
15	65729071	65761438	5circ_000963	3	-	2	3	40	40	T01	3	0	0	1	GTAG	NA	ANCHOR_UNIQUE,CANONICAL,CIRCULAR,PERFECT_EXT,UNAMBIGUOUS_BP
16	15630331	15631498	5circ_000964	5	-	1	5	40	5	T01	5	0	0	1	GTAG	NA	ANCHOR_UNIQUE,CANONICAL,CIRCULAR,PERFECT_EXT,UNAMBIGUOUS_BP
18	45910520	45913828	5circ_000965	6	-	2	6	40	40	T01	6	0	0	1	GTAG	NA	ANCHOR_UNIQUE,CANONICAL,CIRCULAR,PERFECT_EXT,UNAMBIGUOUS_BP
11	111743375	111755450	5circ_000967	3	-	2	3	40	40	T01	3	0	0	1	GTAG	NA	ANCHOR_UNIQUE,CANONICAL,CIRCULAR,PERFECT_EXT,UNAMBIGUOUS_BP
6	42658634	42670240	5circ_000968	2	+	1	2	5	40	T01	2	0	0	1	GTAG	NA	ANCHOR_UNIQUE,CANONICAL,CIRCULAR,PERFECT_EXT,UNAMBIGUOUS_BP
15	65715477	65738875	5circ_000969	16	-	11	10	40	40	T01	16	0	0	1	GTAG	NA	ANCHOR_UNIQUE,CANONICAL,CIRCULAR,PERFECT_EXT,UNAMBIGUOUS_BP
17	8238030	8238629	5circ_000970	26	-	9	26	40	40	T01	26	0	0	1	GTAG	NA	ANCHOR_UNIQUE,CANONICAL,CIRCULAR,PERFECT_EXT,UNAMBIGUOUS_BP
8	41684543	41704472	5circ_000971	4	-	1	4	40	40	T01	4	0	1	1	GTAG	NA	ANCHOR_UNIQUE,CANONICAL,CIRCULAR,GOOD_EXT,UNAMBIGUOUS_BP
17	61972726	61985090	5circ_000972	4	-	1	4	5	5	T01	4	0	0	1	GTAG	NA	ANCHOR_UNIQUE,CANONICAL,CIRCULAR,PERFECT_EXT,UNAMBIGUOUS_BP
12	112203635	112228811	5circ_000973	27	-	14	27	40	40	T01	27	0	0	1	GTAG	NA	ANCHOR_UNIQUE,CANONICAL,CIRCULAR,PERFECT_EXT,UNAMBIGUOUS_BP
20	57407644	57407978	5circ_000974	7	-	1	7	40	5	T01	7	2	0	1	GTAG	NA	ANCHOR_UNIQUE,CANONICAL,CIRCULAR,OK_EXT,UNAMBIGUOUS_BP
9	96872578	96873363	5circ_000977	2	-	1	2	5	40	T01	2	2	0	1	GTAG	NA	ANCHOR_UNIQUE,CANONICAL,CIRCULAR,OK_EXT,UNAMBIGUOUS_BP
1	116760401	116764606	5circ_000978	4	+	3	4	40	40	T01	4	0	0	1	GTAG	NA	ANCHOR_UNIQUE,CANONICAL,CIRCULAR,PERFECT_EXT,UNAMBIGUOUS_BP
4	139137629	139139497	5circ_000979	23	-	13	23	40	40	T01	23	0	0	1	GTAG	NA	ANCHOR_UNIQUE,CANONICAL,CIRCULAR,PERFECT_EXT,UNAMBIGUOUS_BP
12	120713273	120720028	5circ_000980	3	+	2	3	40	40	T01	3	0	0	1	GTAG	NA	ANCHOR_UNIQUE,CANONICAL,CIRCULAR,PERFECT_EXT,UNAMBIGUOUS_BP
12	120510016	120516788	5circ_000981	2	-	2	2	5	40	T01	2	0	0	1	GTAG	NA	ANCHOR_UNIQUE,CANONICAL,CIRCULAR,PERFECT_EXT,UNAMBIGUOUS_BP
19	1218416	1223172	5circ_000982	2	+	2	2	40	40	T01	2	0	0	1	GTAG	NA	ANCHOR_UNIQUE,CANONICAL,CIRCULAR,PERFECT_EXT,UNAMBIGUOUS_BP
12	76845708	76849470	5circ_000983	8	+	4	8	40	40	T01	8	0	0	1	GTAG	NA	ANCHOR_UNIQUE,CANONICAL,CIRCULAR,PERFECT_EXT,UNAMBIGUOUS_BP
8	140572811	140634829	5circ_000987	2	-	1	2	5	5	T01	2	0	0	1	GTAG	NA	ANCHOR_UNIQUE,CANONICAL,CIRCULAR,PERFECT_EXT,UNAMBIGUOUS_BP
2	23798137	23823569	5circ_000989	23	-	14	23	40	40	T01	23	0	0	1	GTAG	NA	ANCHOR_UNIQUE,CANONICAL,CIRCULAR,PERFECT_EXT,UNAMBIGUOUS_BP
17	42498923	42501304	5circ_000991	156	+	54	155	40	40	T01	156	0	0	1	GTAG	NA	ANCHOR_UNIQUE,CANONICAL,CIRCULAR,PERFECT_EXT,UNAMBIGUOUS_BP
2	151465853	151466120	5circ_000993	3	+	1	3	5	5	T01	3	0	0	1	GTAG	NA	ANCHOR_UNIQUE,CANONICAL,CIRCULAR,PERFECT_EXT,UNAMBIGUOUS_BP
21	36291619	36292233	5circ_000994	7	+	2	5	40	5	T01	7	1	0	1	GTAG	NA	ANCHOR_UNIQUE,CANONICAL,CIRCULAR,GOOD_EXT,UNAMBIGUOUS_BP
11	34090178	34092056	5circ_000995	50	+	21	49	40	40	T01	50	0	0	1	GTAG	NA	ANCHOR_UNIQUE,CANONICAL,CIRCULAR,PERFECT_EXT,UNAMBIGUOUS_BP
12	128814774	128815070	5circ_000996	24	-	8	24	40	40	T01	24	0	0	1	GTAG	NA	ANCHOR_UNIQUE,CANONICAL,CIRCULAR,PERFECT_EXT,UNAMBIGUOUS_BP
1	64768655	64789514	5circ_000997	2	+	2	2	5	5	T01	2	0	0	1	GTAG	NA	ANCHOR_UNIQUE,CANONICAL,CIRCULAR,PERFECT_EXT,UNAMBIGUOUS_BP
20	48951322	48952884	5circ_000999	6	+	2	6	40	40	T01	6	0	0	1	GTAG	NA	ANCHOR_UNIQUE,CANONICAL,CIRCULAR,PERFECT_EXT,UNAMBIGUOUS_BP
12	124956690	124957135	5circ_001000	2	-	2	2	5	35	T01	2	0	0	1	GTAG	NA	ANCHOR_UNIQUE,CANONICAL,CIRCULAR,PERFECT_EXT,UNAMBIGUOUS_BP
7	6033301	6037524	5circ_001001	3	-	1	3	5	5	T01	3	0	0	1	GTAG	NA	ANCHOR_UNIQUE,CANONICAL,CIRCULAR,PERFECT_EXT,UNAMBIGUOUS_BP
1	19771307	19787117	5circ_001002	4	-	2	4	40	5	T01	4	0	0	1	GTAG	NA	ANCHOR_UNIQUE,CANONICAL,CIRCULAR,PERFECT_EXT,UNAMBIGUOUS_BP
17	5521523	5530704	5circ_001003	4	-	2	4	40	40	T01	4	0	0	1	GTAG	NA	ANCHOR_UNIQUE,CANONICAL,CIRCULAR,PERFECT_EXT,UNAMBIGUOUS_BP
1	185214262	185231708	5circ_001004	8	+	4	8	40	40	T01	8	0	0	1	GTAG	NA	ANCHOR_UNIQUE,CANONICAL,CIRCULAR,PERFECT_EXT,UNAMBIGUOUS_BP
5	142787459	142792773	5circ_001005	10	+	6	10	40	40	T01	10	0	0	1	GTAG	NA	ANCHOR_UNIQUE,CANONICAL,CIRCULAR,PERFECT_EXT,UNAMBIGUOUS_BP
7	105285008	105297533	5circ_001006	19	-	7	19	40	40	T01	19	0	0	1	GTAG	NA	ANCHOR_UNIQUE,CANONICAL,CIRCULAR,PERFECT_EXT,UNAMBIGUOUS_BP
22	42890946	42891182	5circ_001007	2	-	2	2	40	40	T01	2	0	0	1	GTAG	NA	ANCHOR_UNIQUE,CANONICAL,CIRCULAR,PERFECT_EXT,UNAMBIGUOUS_BP
2	54982514	54987698	5circ_001008	4	-	4	4	40	40	T01	4	0	0	1	GTAG	NA	ANCHOR_UNIQUE,CANONICAL,CIRCULAR,PERFECT_EXT,UNAMBIGUOUS_BP
8	38249707	38252287	5circ_001009	3	+	1	3	5	40	T01	3	0	0	1	GTAG	NA	ANCHOR_UNIQUE,CANONICAL,CIRCULAR,PERFECT_EXT,UNAMBIGUOUS_BP
14	21426127	21428035	5circ_001010	2	-	2	2	40	40	T01	2	0	0	1	GTAG	NA	ANCHOR_UNIQUE,CANONICAL,CIRCULAR,PERFECT_EXT,UNAMBIGUOUS_BP
11	93790573	93795060	5circ_001011	4	+	2	4	5	5	T01	4	0	0	1	GTAG	NA	ANCHOR_UNIQUE,CANONICAL,CIRCULAR,PERFECT_EXT,UNAMBIGUOUS_BP
10	124826594	124831463	5circ_001012	2	+	1	2	40	40	T01	2	0	0	1	GTAG	NA	ANCHOR_UNIQUE,CANONICAL,CIRCULAR,PERFECT_EXT,UNAMBIGUOUS_BP
3	182961225	182965753	5circ_001013	3	-	2	3	5	40	T01	3	0	0	1	GTAG	NA	ANCHOR_UNIQUE,CANONICAL,CIRCULAR,PERFECT_EXT,UNAMBIGUOUS_BP
3	172362632	172381093	5circ_001014	4	+	2	4	5	40	T01	4	0	0	1	GTAG	NA	ANCHOR_UNIQUE,CANONICAL,CIRCULAR,PERFECT_EXT,UNAMBIGUOUS_BP
13	49993792	50044768	5circ_001015	2	-	2	1	40	5	T01	2	0	0	1	GTAG	NA	ANCHOR_UNIQUE,CANONICAL,CIRCULAR,PERFECT_EXT,UNAMBIGUOUS_BP
9	70323482	70350471	5circ_001016	4	+	2	4	40	40	T01	4	0	0	1	GTAG	NA	ANCHOR_UNIQUE,CANONICAL,CIRCULAR,PERFECT_EXT,UNAMBIGUOUS_BP
4	148023262	148047051	5circ_001017	2	+	2	2	40	5	T01	2	0	0	1	GTAG	NA	ANCHOR_UNIQUE,CANONICAL,CIRCULAR,PERFECT_EXT,UNAMBIGUOUS_BP
9	33293652	33295427	5circ_001018	4	+	2	4	40	40	T01	4	0	0	1	GTAG	NA	ANCHOR_UNIQUE,CANONICAL,CIRCULAR,PERFECT_EXT,UNAMBIGUOUS_BP
9	38016010	38027834	5circ_001020	2	-	2	2	5	40	T01	2	0	0	1	GTAG	NA	ANCHOR_UNIQUE,CANONICAL,CIRCULAR,PERFECT_EXT,UNAMBIGUOUS_BP
17	78091439	78093763	5circ_001022	7	+	3	7	40	40	T01	7	0	0	1	GTAG	NA	ANCHOR_UNIQUE,CANONICAL,CIRCULAR,PERFECT_EXT,UNAMBIGUOUS_BP
X	73831065	73837503	5circ_001023	2	-	1	2	5	40	T01	2	0	0	1	GTAG	NA	ANCHOR_UNIQUE,CANONICAL,CIRCULAR,PERFECT_EXT,UNAMBIGUOUS_BP
5	126878184	126918227	5circ_001027	14	-	6	14	40	40	T01	14	0	0	1	GTAG	NA	ANCHOR_UNIQUE,CANONICAL,CIRCULAR,PERFECT_EXT,UNAMBIGUOUS_BP
13	24294738	24297735	5circ_001028	7	+	5	7	40	40	T01	7	0	0	1	GTAG	NA	ANCHOR_UNIQUE,CANONICAL,CIRCULAR,PERFECT_EXT,UNAMBIGUOUS_BP
10	131996241	132001391	5circ_001029	2	+	1	2	5	40	T01	2	0	0	1	GTAG	NA	ANCHOR_UNIQUE,CANONICAL,CIRCULAR,PERFECT_EXT,UNAMBIGUOUS_BP
1	26257596	26259802	5circ_001030	2	+	2	2	5	40	T01	2	0	0	1	GTAG	NA	ANCHOR_UNIQUE,CANONICAL,CIRCULAR,PERFECT_EXT,UNAMBIGUOUS_BP
2	26278613	26280115	5circ_001031	3	+	3	2	40	5	T01	3	0	0	1	GTAG	NA	ANCHOR_UNIQUE,CANONICAL,CIRCULAR,PERFECT_EXT,UNAMBIGUOUS_BP
7	66551519	66576932	5circ_001032	3	-	1	3	40	5	T01	3	0	0	1	GTAG	NA	ANCHOR_UNIQUE,CANONICAL,CIRCULAR,PERFECT_EXT,UNAMBIGUOUS_BP
6	108567171	108569742	5circ_001033	3	+	3	3	40	40	T01	3	1	0	1	GTAG	NA	ANCHOR_UNIQUE,CANONICAL,CIRCULAR,GOOD_EXT,UNAMBIGUOUS_BP
19	35019190	35019533	5circ_001034	2	+	1	2	40	5	T01	2	0	0	1	GTAG	NA	ANCHOR_UNIQUE,CANONICAL,CIRCULAR,PERFECT_EXT,UNAMBIGUOUS_BP
19	13913167	13913638	5circ_001035	4	+	2	4	40	40	T01	4	0	0	1	GTAG	NA	ANCHOR_UNIQUE,CANONICAL,CIRCULAR,PERFECT_EXT,UNAMBIGUOUS_BP
10	123360283	123362147	5circ_001037	8	+	2	8	40	40	T01	8	0	0	1	GTAG	NA	ANCHOR_UNIQUE,CANONICAL,CIRCULAR,PERFECT_EXT,UNAMBIGUOUS_BP
11	47232813	47235412	5circ_001039	4	+	1	4	40	40	T01	4	0	0	1	GTAG	NA	ANCHOR_UNIQUE,CANONICAL,CIRCULAR,PERFECT_EXT,UNAMBIGUOUS_BP
20	47249286	47298872	5circ_001040	2	-	2	2	40	40	T01	2	0	0	1	GTAG	NA	ANCHOR_UNIQUE,CANONICAL,CIRCULAR,PERFECT_EXT,UNAMBIGUOUS_BP
3	152299404	152300367	5circ_001041	12	+	7	11	40	40	T01	12	0	0	1	GTAG	NA	ANCHOR_UNIQUE,CANONICAL,CIRCULAR,PERFECT_EXT,UNAMBIGUOUS_BP
5	131677702	131710661	5circ_001042	4	-	1	4	40	5	T01	4	0	0	1	GTAG	NA	ANCHOR_UNIQUE,CANONICAL,CIRCULAR,PERFECT_EXT,UNAMBIGUOUS_BP
16	74632522	74636577	5circ_001043	2	-	2	2	40	40	T01	2	0	0	1	GTAG	NA	ANCHOR_UNIQUE,CANONICAL,CIRCULAR,PERFECT_EXT,UNAMBIGUOUS_BP
4	51863436	51877854	5circ_001044	2	+	1	2	40	40	T01	2	0	0	1	GTAG	NA	ANCHOR_UNIQUE,CANONICAL,CIRCULAR,PERFECT_EXT,UNAMBIGUOUS_BP
5	151045860	151049947	5circ_001045	5	-	1	5	40	5	T01	5	0	0	1	GTAG	NA	ANCHOR_UNIQUE,CANONICAL,CIRCULAR,PERFECT_EXT,UNAMBIGUOUS_BP
22	41342532	41343576	5circ_001046	4	+	2	4	5	40	T01	4	0	0	1	GTAG	NA	ANCHOR_UNIQUE,CANONICAL,CIRCULAR,PERFECT_EXT,UNAMBIGUOUS_BP
19	11113277	11113762	5circ_001048	3	+	1	3	40	40	T01	3	0	0	1	GTAG	NA	ANCHOR_UNIQUE,CANONICAL,CIRCULAR,PERFECT_EXT,UNAMBIGUOUS_BP
1	235686948	235697272	5circ_001049	3	-	1	3	40	40	T01	3	0	0	1	GTAG	NA	ANCHOR_UNIQUE,CANONICAL,CIRCULAR,PERFECT_EXT,UNAMBIGUOUS_BP
10	119904083	119909130	5circ_001050	2	+	1	2	40	5	T01	2	0	0	1	GTAG	NA	ANCHOR_UNIQUE,CANONICAL,CIRCULAR,PERFECT_EXT,UNAMBIGUOUS_BP
9	120960247	120963738	5circ_001051	3	-	1	3	40	5	T01	3	0	0	1	GTAG	NA	ANCHOR_UNIQUE,CANONICAL,CIRCULAR,PERFECT_EXT,UNAMBIGUOUS_BP
1	158677689	158685347	5circ_001052	3	-	1	3	5	5	T01	3	2	0	1	GTAG	NA	ANCHOR_UNIQUE,CANONICAL,CIRCULAR,OK_EXT,UNAMBIGUOUS_BP
15	57231151	57243550	5circ_001053	2	+	1	2	5	40	T01	2	0	0	1	GTAG	NA	ANCHOR_UNIQUE,CANONICAL,CIRCULAR,PERFECT_EXT,UNAMBIGUOUS_BP
9	125321432	125332629	5circ_001054	2	+	1	2	40	40	T01	2	0	0	1	GTAG	NA	ANCHOR_UNIQUE,CANONICAL,CIRCULAR,PERFECT_EXT,UNAMBIGUOUS_BP
20	62159876	62165514	5circ_001055	10	+	1	10	40	35	T01	10	0	0	1	GTAG	NA	ANCHOR_UNIQUE,CANONICAL,CIRCULAR,PERFECT_EXT,UNAMBIGUOUS_BP
3	9436067	9436888	5circ_001057	3	+	2	3	5	40	T01	3	0	0	1	GTAG	NA	ANCHOR_UNIQUE,CANONICAL,CIRCULAR,PERFECT_EXT,UNAMBIGUOUS_BP
12	121894738	121903107	5circ_001058	2	+	1	2	5	5	T01	2	0	0	1	GTAG	NA	ANCHOR_UNIQUE,CANONICAL,CIRCULAR,PERFECT_EXT,UNAMBIGUOUS_BP
11	19230240	19232371	5circ_001059	2	-	2	2	5	40	T01	2	0	0	1	GTAG	NA	ANCHOR_UNIQUE,CANONICAL,CIRCULAR,PERFECT_EXT,UNAMBIGUOUS_BP
16	89220996	89225631	5circ_001060	4	+	2	4	40	40	T01	4	0	0	1	GTAG	NA	ANCHOR_UNIQUE,CANONICAL,CIRCULAR,PERFECT_EXT,UNAMBIGUOUS_BP
5	36950998	36962274	5circ_001061	5	+	2	5	5	40	T01	5	0	0	1	GTAG	NA	ANCHOR_UNIQUE,CANONICAL,CIRCULAR,PERFECT_EXT,UNAMBIGUOUS_BP
2	207596913	207597483	5circ_001062	2	+	1	2	40	40	T01	2	0	0	1	GTAG	NA	ANCHOR_UNIQUE,CANONICAL,CIRCULAR,PERFECT_EXT,UNAMBIGUOUS_BP
4	48575116	48590727	5circ_001063	3	-	1	3	40	5	T01	3	0	0	1	GTAG	NA	ANCHOR_UNIQUE,CANONICAL,CIRCULAR,PERFECT_EXT,UNAMBIGUOUS_BP
11	113741693	113744040	5circ_001064	2	-	1	2	5	5	T01	2	0	0	1	GTAG	NA	ANCHOR_UNIQUE,CANONICAL,CIRCULAR,PERFECT_EXT,UNAMBIGUOUS_BP
2	229840821	229860531	5circ_001066	2	-	2	2	40	40	T01	2	0	0	1	GTAG	NA	ANCHOR_UNIQUE,CANONICAL,CIRCULAR,PERFECT_EXT,UNAMBIGUOUS_BP
7	66638252	66643611	5circ_001067	2	+	1	2	5	40	T01	2	0	0	1	GTAG	NA	ANCHOR_UNIQUE,CANONICAL,CIRCULAR,PERFECT_EXT,UNAMBIGUOUS_BP
17	59764970	59773885	5circ_001068	10	+	2	10	5	5	T01	10	0	0	1	GTAG	NA	ANCHOR_UNIQUE,CANONICAL,CIRCULAR,PERFECT_EXT,UNAMBIGUOUS_BP
1	46572062	46573695	5circ_001069	3	-	2	3	5	40	T01	3	0	0	1	GTAG	NA	ANCHOR_UNIQUE,CANONICAL,CIRCULAR,PERFECT_EXT,UNAMBIGUOUS_BP
17	62010549	62030013	5circ_001070	2	-	1	2	5	5	T01	2	0	0	1	GTAG	NA	ANCHOR_UNIQUE,CANONICAL,CIRCULAR,PERFECT_EXT,UNAMBIGUOUS_BP
12	26595464	26655852	5circ_001071	2	-	2	2	40	5	T01	2	0	0	1	GTAG	NA	ANCHOR_UNIQUE,CANONICAL,CIRCULAR,PERFECT_EXT,UNAMBIGUOUS_BP
1	43671504	43683804	5circ_001072	2	+	1	2	40	5	T01	2	0	0	1	GTAG	NA	ANCHOR_UNIQUE,CANONICAL,CIRCULAR,PERFECT_EXT,UNAMBIGUOUS_BP
17	43521368	43522226	5circ_001073	2	+	2	2	40	40	T01	2	0	0	1	GTAG	NA	ANCHOR_UNIQUE,CANONICAL,CIRCULAR,PERFECT_EXT,UNAMBIGUOUS_BP
4	39872985	39925933	5circ_001074	4	-	1	4	40	40	T01	4	0	0	1	GTAG	NA	ANCHOR_UNIQUE,CANONICAL,CIRCULAR,PERFECT_EXT,UNAMBIGUOUS_BP
13	19661697	19670363	5circ_001076	2	+	1	2	5	5	T01	2	0	0	1	GTAG	NA	ANCHOR_UNIQUE,CANONICAL,CIRCULAR,PERFECT_EXT,UNAMBIGUOUS_BP
12	71657525	71660427	5circ_001077	9	-	3	9	40	40	T01	9	0	0	1	GTAG	NA	ANCHOR_UNIQUE,CANONICAL,CIRCULAR,PERFECT_EXT,UNAMBIGUOUS_BP
4	2949933	2953645	5circ_001078	2	-	1	2	40	5	T01	2	0	0	1	GTAG	NA	ANCHOR_UNIQUE,CANONICAL,CIRCULAR,PERFECT_EXT,UNAMBIGUOUS_BP
22	47053839	47054382	5circ_001081	5	+	1	5	5	5	T01	5	0	0	1	GTAG	NA	ANCHOR_UNIQUE,CANONICAL,CIRCULAR,PERFECT_EXT,UNAMBIGUOUS_BP
1	156199834	156200472	5circ_001082	4	+	1	4	5	5	T01	4	0	0	1	GTAG	NA	ANCHOR_UNIQUE,CANONICAL,CIRCULAR,PERFECT_EXT,UNAMBIGUOUS_BP
20	33385649	33395116	5circ_001083	2	-	1	2	40	40	T01	2	0	0	1	GTAG	NA	ANCHOR_UNIQUE,CANONICAL,CIRCULAR,PERFECT_EXT,UNAMBIGUOUS_BP
10	46014443	46016694	5circ_001084	13	-	8	4	40	5	T01	13	0	0	1	GTAG	NA	ANCHOR_UNIQUE,CANONICAL,CIRCULAR,PERFECT_EXT,UNAMBIGUOUS_BP
3	148592183	148667102	5circ_001085	4	-	1	4	5	5	T01	4	0	0	1	GTAG	NA	ANCHOR_UNIQUE,CANONICAL,CIRCULAR,PERFECT_EXT,UNAMBIGUOUS_BP
19	12876179	12878834	5circ_001086	12	-	8	9	40	40	T01	12	0	0	1	GTAG	NA	ANCHOR_UNIQUE,CANONICAL,CIRCULAR,PERFECT_EXT,UNAMBIGUOUS_BP
19	44548897	44549176	5circ_001087	6	-	3	6	40	40	T01	6	0	0	1	GTAG	NA	ANCHOR_UNIQUE,CANONICAL,CIRCULAR,PERFECT_EXT,UNAMBIGUOUS_BP
9	37424844	37426654	5circ_001089	153	+	47	151	40	40	T01	153	0	0	1	GTAG	NA	ANCHOR_UNIQUE,CANONICAL,CIRCULAR,PERFECT_EXT,UNAMBIGUOUS_BP
19	47289997	47292173	5circ_001090	2	+	1	2	5	5	T01	2	0	0	1	GTAG	NA	ANCHOR_UNIQUE,CANONICAL,CIRCULAR,PERFECT_EXT,UNAMBIGUOUS_BP
19	54885234	54885525	5circ_001092	7	+	5	7	40	40	T01	7	0	0	1	GTAG	NA	ANCHOR_UNIQUE,CANONICAL,CIRCULAR,PERFECT_EXT,UNAMBIGUOUS_BP
2	151436826	151443709	5circ_001093	5	+	3	5	40	5	T01	5	0	0	1	GTAG	NA	ANCHOR_UNIQUE,CANONICAL,CIRCULAR,PERFECT_EXT,UNAMBIGUOUS_BP
20	64022756	64026058	5circ_001094	22	+	10	22	40	40	T01	22	0	0	1	GTAG	NA	ANCHOR_UNIQUE,CANONICAL,CIRCULAR,PERFECT_EXT,UNAMBIGUOUS_BP
6	52366298	52369567	5circ_001095	4	+	2	4	40	5	T01	4	0	0	1	GTAG	NA	ANCHOR_UNIQUE,CANONICAL,CIRCULAR,PERFECT_EXT,UNAMBIGUOUS_BP
2	26364301	26375148	5circ_001096	2	+	1	2	40	5	T01	2	0	0	1	GTAG	NA	ANCHOR_UNIQUE,CANONICAL,CIRCULAR,PERFECT_EXT,UNAMBIGUOUS_BP
13	60439687	60467379	5circ_001097	3	+	3	1	5	40	T01	3	0	0	1	GTAG	NA	ANCHOR_UNIQUE,CANONICAL,CIRCULAR,PERFECT_EXT,UNAMBIGUOUS_BP
19	11178344	11178720	5circ_001099	68	-	36	67	40	40	T01	68	0	0	1	GTAG	NA	ANCHOR_UNIQUE,CANONICAL,CIRCULAR,PERFECT_EXT,UNAMBIGUOUS_BP
17	20204332	20260294	5circ_001100	2	+	2	2	35	40	T01	2	0	0	1	GTAG	NA	ANCHOR_UNIQUE,CANONICAL,CIRCULAR,PERFECT_EXT,UNAMBIGUOUS_BP
11	3683199	3695606	5circ_001102	2	-	2	2	40	40	T01	2	0	0	1	GTAG	NA	ANCHOR_UNIQUE,CANONICAL,CIRCULAR,PERFECT_EXT,UNAMBIGUOUS_BP
2	101281858	101295181	5circ_001103	7	-	3	7	40	40	T01	7	0	0	1	GTAG	NA	ANCHOR_UNIQUE,CANONICAL,CIRCULAR,PERFECT_EXT,UNAMBIGUOUS_BP
16	86675	119255	5circ_001105	3	-	1	3	5	40	T01	3	0	0	1	GTAG	NA	ANCHOR_UNIQUE,CANONICAL,CIRCULAR,PERFECT_EXT,UNAMBIGUOUS_BP
1	235677090	235697272	5circ_001106	20	-	5	20	40	40	T01	20	0	0	1	GTAG	NA	ANCHOR_UNIQUE,CANONICAL,CIRCULAR,PERFECT_EXT,UNAMBIGUOUS_BP
20	62273308	62284169	5circ_001107	2	+	1	2	40	40	T01	2	0	0	1	GTAG	NA	ANCHOR_UNIQUE,CANONICAL,CIRCULAR,PERFECT_EXT,UNAMBIGUOUS_BP
8	21974669	21995599	5circ_001108	4	+	2	4	40	40	T01	4	0	0	1	GTAG	NA	ANCHOR_UNIQUE,CANONICAL,CIRCULAR,PERFECT_EXT,UNAMBIGUOUS_BP
14	91783135	91802421	5circ_001109	5	-	1	5	40	40	T01	5	0	0	1	GTAG	NA	ANCHOR_UNIQUE,CANONICAL,CIRCULAR,PERFECT_EXT,UNAMBIGUOUS_BP
11	62535944	62536567	5circ_001111	9	-	5	7	40	40	T01	9	0	0	1	GTAG	NA	ANCHOR_UNIQUE,CANONICAL,CIRCULAR,PERFECT_EXT,UNAMBIGUOUS_BP
15	89276710	89285218	5circ_001112	2	+	1	2	5	40	T01	2	0	0	1	GTAG	NA	ANCHOR_UNIQUE,CANONICAL,CIRCULAR,PERFECT_EXT,UNAMBIGUOUS_BP
7	107281299	107283732	5circ_001113	2	-	1	2	5	40	T01	2	0	0	1	GTAG	NA	ANCHOR_UNIQUE,CANONICAL,CIRCULAR,PERFECT_EXT,UNAMBIGUOUS_BP
13	49451552	49467960	5circ_001116	10	+	4	10	40	40	T01	10	0	0	1	GTAG	NA	ANCHOR_UNIQUE,CANONICAL,CIRCULAR,PERFECT_EXT,UNAMBIGUOUS_BP
11	120477218	120484780	5circ_001118	4	+	2	4	40	40	T01	4	0	0	1	GTAG	NA	ANCHOR_UNIQUE,CANONICAL,CIRCULAR,PERFECT_EXT,UNAMBIGUOUS_BP
18	45899403	45904117	5circ_001119	6	-	2	6	40	40	T01	6	0	0	1	GTAG	NA	ANCHOR_UNIQUE,CANONICAL,CIRCULAR,PERFECT_EXT,UNAMBIGUOUS_BP
14	67352922	67353959	5circ_001120	5	-	2	5	37	5	T01	5	0	0	1	GTAG	NA	ANCHOR_UNIQUE,CANONICAL,CIRCULAR,PERFECT_EXT,UNAMBIGUOUS_BP
4	102304316	102324998	5circ_001122	20	-	5	20	40	40	T01	20	0	0	1	GTAG	NA	ANCHOR_UNIQUE,CANONICAL,CIRCULAR,PERFECT_EXT,UNAMBIGUOUS_BP
21	44079540	44083059	5circ_001123	2	+	1	2	5	40	T01	2	0	0	1	GTAG	NA	ANCHOR_UNIQUE,CANONICAL,CIRCULAR,PERFECT_EXT,UNAMBIGUOUS_BP
7	44666735	44681848	5circ_001124	2	+	2	2	40	40	T01	2	0	0	1	GTAG	NA	ANCHOR_UNIQUE,CANONICAL,CIRCULAR,PERFECT_EXT,UNAMBIGUOUS_BP
13	19709541	19782791	5circ_001125	4	-	1	4	5	5	T01	4	0	0	1	GTAG	NA	ANCHOR_UNIQUE,CANONICAL,CIRCULAR,PERFECT_EXT,UNAMBIGUOUS_BP
8	123333877	123337821	5circ_001128	11	-	4	11	40	40	T01	11	0	0	1	GTAG	NA	ANCHOR_UNIQUE,CANONICAL,CIRCULAR,PERFECT_EXT,UNAMBIGUOUS_BP
22	30016527	30018072	5circ_001129	2	+	2	2	40	5	T01	2	0	0	1	GTAG	NA	ANCHOR_UNIQUE,CANONICAL,CIRCULAR,PERFECT_EXT,UNAMBIGUOUS_BP
4	20709682	20727397	5circ_001130	2	+	1	2	5	5	T01	2	0	0	1	GTAG	NA	ANCHOR_UNIQUE,CANONICAL,CIRCULAR,PERFECT_EXT,UNAMBIGUOUS_BP
21	29351633	29361713	5circ_001131	2	+	1	2	5	5	T01	2	0	0	1	GTAG	NA	ANCHOR_UNIQUE,CANONICAL,CIRCULAR,PERFECT_EXT,UNAMBIGUOUS_BP
6	5404541	5431172	5circ_001132	7	+	2	5	40	5	T01	7	0	0	1	GTAG	NA	ANCHOR_UNIQUE,CANONICAL,CIRCULAR,PERFECT_EXT,UNAMBIGUOUS_BP
22	40261831	40270280	5circ_001133	4	+	1	4	40	5	T01	4	0	0	1	GTAG	NA	ANCHOR_UNIQUE,CANONICAL,CIRCULAR,PERFECT_EXT,UNAMBIGUOUS_BP
3	71198201	71198392	5circ_001134	2	-	2	2	40	40	T01	2	1	0	1	GTAG	NA	ANCHOR_UNIQUE,CANONICAL,CIRCULAR,GOOD_EXT,UNAMBIGUOUS_BP
15	63764095	63775649	5circ_001135	4	-	4	4	40	37	T01	4	0	0	1	GTAG	NA	ANCHOR_UNIQUE,CANONICAL,CIRCULAR,PERFECT_EXT,UNAMBIGUOUS_BP
5	37243012	37247745	5circ_001137	7	-	1	7	40	5	T01	7	0	0	1	GTAG	NA	ANCHOR_UNIQUE,CANONICAL,CIRCULAR,PERFECT_EXT,UNAMBIGUOUS_BP
13	28256291	28272071	5circ_001138	2	+	2	2	40	5	T01	2	0	0	1	GTAG	NA	ANCHOR_UNIQUE,CANONICAL,CIRCULAR,PERFECT_EXT,UNAMBIGUOUS_BP
1	224393827	224411565	5circ_001139	3	-	1	3	40	40	T01	3	0	0	1	GTAG	NA	ANCHOR_UNIQUE,CANONICAL,CIRCULAR,PERFECT_EXT,UNAMBIGUOUS_BP
16	47663676	47693507	5circ_001141	4	+	1	4	40	40	T01	4	0	0	1	GTAG	NA	ANCHOR_UNIQUE,CANONICAL,CIRCULAR,PERFECT_EXT,UNAMBIGUOUS_BP
17	44154555	44155411	5circ_001142	6	+	3	6	40	40	T01	6	0	0	1	GTAG	NA	ANCHOR_UNIQUE,CANONICAL,CIRCULAR,PERFECT_EXT,UNAMBIGUOUS_BP
3	47425484	47428670	5circ_001145	91	-	31	88	40	40	T01	91	0	0	1	GTAG	NA	ANCHOR_UNIQUE,CANONICAL,CIRCULAR,PERFECT_EXT,UNAMBIGUOUS_BP
2	101257837	101262691	5circ_001146	6	+	2	6	40	5	T01	6	0	0	1	GTAG	NA	ANCHOR_UNIQUE,CANONICAL,CIRCULAR,PERFECT_EXT,UNAMBIGUOUS_BP
7	48580223	48594813	5circ_001147	2	+	1	2	5	40	T01	2	0	0	1	GTAG	NA	ANCHOR_UNIQUE,CANONICAL,CIRCULAR,PERFECT_EXT,UNAMBIGUOUS_BP
10	91980453	91997751	5circ_001148	3	+	1	3	40	5	T01	3	0	0	1	GTAG	NA	ANCHOR_UNIQUE,CANONICAL,CIRCULAR,PERFECT_EXT,UNAMBIGUOUS_BP
2	165941026	165943341	5circ_001149	3	-	1	3	5	5	T01	3	0	0	1	GTAG	NA	ANCHOR_UNIQUE,CANONICAL,CIRCULAR,PERFECT_EXT,UNAMBIGUOUS_BP
6	87663002	87667173	5circ_001151	2	+	1	2	5	5	T01	2	0	0	1	GTAG	NA	ANCHOR_UNIQUE,CANONICAL,CIRCULAR,PERFECT_EXT,UNAMBIGUOUS_BP
5	73063844	73074853	5circ_001154	2	+	1	2	5	5	T01	2	0	0	1	GTAG	NA	ANCHOR_UNIQUE,CANONICAL,CIRCULAR,PERFECT_EXT,UNAMBIGUOUS_BP
3	196064308	196069568	5circ_001155	31	-	16	31	40	40	T01	31	0	0	1	GTAG	NA	ANCHOR_UNIQUE,CANONICAL,CIRCULAR,PERFECT_EXT,UNAMBIGUOUS_BP
13	51960147	51968607	5circ_001157	12	-	6	11	40	40	T01	12	0	0	1	GTAG	NA	ANCHOR_UNIQUE,CANONICAL,CIRCULAR,PERFECT_EXT,UNAMBIGUOUS_BP
9	271626	289581	5circ_001158	8	+	2	5	40	40	T01	8	1	0	1	GTAG	NA	ANCHOR_UNIQUE,CANONICAL,CIRCULAR,GOOD_EXT,UNAMBIGUOUS_BP
7	2731117	2733501	5circ_001159	4	-	1	4	40	40	T01	4	0	0	1	GTAG	NA	ANCHOR_UNIQUE,CANONICAL,CIRCULAR,PERFECT_EXT,UNAMBIGUOUS_BP
17	1497935	1509799	5circ_001161	2	-	1	2	5	40	T01	2	0	0	1	GTAG	NA	ANCHOR_UNIQUE,CANONICAL,CIRCULAR,PERFECT_EXT,UNAMBIGUOUS_BP
5	10405557	10415669	5circ_001163	4	+	1	4	40	40	T01	4	0	0	1	GTAG	NA	ANCHOR_UNIQUE,CANONICAL,CIRCULAR,PERFECT_EXT,UNAMBIGUOUS_BP
2	99412730	99435941	5circ_001164	6	-	3	6	40	40	T01	6	0	0	1	GTAG	NA	ANCHOR_UNIQUE,CANONICAL,CIRCULAR,PERFECT_EXT,UNAMBIGUOUS_BP
1	28987447	29011907	5circ_001165	2	+	1	2	35	5	T01	2	0	0	1	GTAG	NA	ANCHOR_UNIQUE,CANONICAL,CIRCULAR,PERFECT_EXT,UNAMBIGUOUS_BP
10	60261858	60279639	5circ_001166	8	-	1	8	5	40	T01	8	0	0	1	GTAG	NA	ANCHOR_UNIQUE,CANONICAL,CIRCULAR,PERFECT_EXT,UNAMBIGUOUS_BP
21	36247516	36248568	5circ_001167	132	+	51	130	40	40	T01	132	0	0	1	GTAG	NA	ANCHOR_UNIQUE,CANONICAL,CIRCULAR,PERFECT_EXT,UNAMBIGUOUS_BP
20	48951322	48953790	5circ_001168	25	+	7	25	40	40	T01	25	0	0	1	GTAG	NA	ANCHOR_UNIQUE,CANONICAL,CIRCULAR,PERFECT_EXT,UNAMBIGUOUS_BP
17	46169530	46172232	5circ_001169	5	-	3	5	35	40	T01	5	0	0	1	GTAG	NA	ANCHOR_UNIQUE,CANONICAL,CIRCULAR,PERFECT_EXT,UNAMBIGUOUS_BP
2	196789203	196793152	5circ_001171	2	-	2	2	40	40	T01	2	0	0	1	GTAG	NA	ANCHOR_UNIQUE,CANONICAL,CIRCULAR,PERFECT_EXT,UNAMBIGUOUS_BP
3	15013588	15043086	5circ_001172	8	+	2	8	40	40	T01	8	0	0	1	GTAG	NA	ANCHOR_UNIQUE,CANONICAL,CIRCULAR,PERFECT_EXT,UNAMBIGUOUS_BP
12	109249983	109259108	5circ_001173	7	+	2	7	40	40	T01	7	0	0	1	GTAG	NA	ANCHOR_UNIQUE,CANONICAL,CIRCULAR,PERFECT_EXT,UNAMBIGUOUS_BP
1	47272075	47282459	5circ_001174	4	-	3	4	40	40	T01	4	0	0	1	GTAG	NA	ANCHOR_UNIQUE,CANONICAL,CIRCULAR,PERFECT_EXT,UNAMBIGUOUS_BP
17	82763964	82768566	5circ_001175	2	+	1	2	40	40	T01	2	0	0	1	GTAG	NA	ANCHOR_UNIQUE,CANONICAL,CIRCULAR,PERFECT_EXT,UNAMBIGUOUS_BP
4	138179216	138185244	5circ_001176	12	-	5	12	40	40	T01	12	1	0	1	GTAG	NA	ANCHOR_UNIQUE,CANONICAL,CIRCULAR,GOOD_EXT,UNAMBIGUOUS_BP
9	5931543	5933881	5circ_001177	3	-	2	3	5	40	T01	3	0	0	1	GTAG	NA	ANCHOR_UNIQUE,CANONICAL,CIRCULAR,PERFECT_EXT,UNAMBIGUOUS_BP
11	68784814	68796933	5circ_001179	3	-	2	3	5	40	T01	3	0	0	1	GTAG	NA	ANCHOR_UNIQUE,CANONICAL,CIRCULAR,PERFECT_EXT,UNAMBIGUOUS_BP
17	45081643	45086652	5circ_001180	4	+	4	4	40	40	T01	4	0	0	1	GTAG	NA	ANCHOR_UNIQUE,CANONICAL,CIRCULAR,PERFECT_EXT,UNAMBIGUOUS_BP
2	74159090	74172752	5circ_001181	12	-	4	12	40	40	T01	12	0	0	1	GTAG	NA	ANCHOR_UNIQUE,CANONICAL,CIRCULAR,PERFECT_EXT,UNAMBIGUOUS_BP
16	1803948	1809833	5circ_001182	4	-	1	4	40	40	T01	4	2	0	1	GTAG	NA	ANCHOR_UNIQUE,CANONICAL,CIRCULAR,OK_EXT,UNAMBIGUOUS_BP
2	113719153	113750568	5circ_001186	2	-	1	2	40	5	T01	2	0	0	1	GTAG	NA	ANCHOR_UNIQUE,CANONICAL,CIRCULAR,PERFECT_EXT,UNAMBIGUOUS_BP
16	18815174	18817470	5circ_001188	10	-	3	10	40	40	T01	10	0	0	1	GTAG	NA	ANCHOR_UNIQUE,CANONICAL,CIRCULAR,PERFECT_EXT,UNAMBIGUOUS_BP
6	133980081	133984479	5circ_001189	2	+	1	2	40	40	T01	2	0	0	1	GTAG	NA	ANCHOR_UNIQUE,CANONICAL,CIRCULAR,PERFECT_EXT,UNAMBIGUOUS_BP
9	4985939	5045375	5circ_001190	2	+	1	2	5	40	T01	2	1	0	1	GTAG	NA	ANCHOR_UNIQUE,CANONICAL,CIRCULAR,GOOD_EXT,UNAMBIGUOUS_BP
10	15833629	15847943	5circ_001191	10	-	3	10	40	40	T01	10	0	0	1	GTAG	NA	ANCHOR_UNIQUE,CANONICAL,CIRCULAR,PERFECT_EXT,UNAMBIGUOUS_BP
1	54036609	54043525	5circ_001192	2	-	1	2	5	35	T01	2	0	0	1	GTAG	NA	ANCHOR_UNIQUE,CANONICAL,CIRCULAR,PERFECT_EXT,UNAMBIGUOUS_BP
15	38502311	38505920	5circ_001194	9	-	4	9	40	40	T01	9	0	0	1	GTAG	NA	ANCHOR_UNIQUE,CANONICAL,CIRCULAR,PERFECT_EXT,UNAMBIGUOUS_BP
10	98395195	98400257	5circ_001195	2	-	1	2	40	5	T01	2	0	0	1	GTAG	NA	ANCHOR_UNIQUE,CANONICAL,CIRCULAR,PERFECT_EXT,UNAMBIGUOUS_BP
12	111681636	111683307	5circ_001197	2	-	1	2	40	40	T01	2	0	0	1	GTAG	NA	ANCHOR_UNIQUE,CANONICAL,CIRCULAR,PERFECT_EXT,UNAMBIGUOUS_BP
1	61158874	61186527	5circ_001200	4	+	2	4	5	40	T01	4	0	0	1	GTAG	NA	ANCHOR_UNIQUE,CANONICAL,CIRCULAR,PERFECT_EXT,UNAMBIGUOUS_BP
3	141278341	141287453	5circ_001201	3	+	1	3	40	5	T01	3	0	0	1	GTAG	NA	ANCHOR_UNIQUE,CANONICAL,CIRCULAR,PERFECT_EXT,UNAMBIGUOUS_BP
22	19351357	19396947	5circ_001203	4	-	1	4	40	40	T01	4	0	0	1	GTAG	NA	ANCHOR_UNIQUE,CANONICAL,CIRCULAR,PERFECT_EXT,UNAMBIGUOUS_BP
11	62870744	62871669	5circ_001204	3	+	2	2	5	5	T01	3	0	0	1	GTAG	NA	ANCHOR_UNIQUE,CANONICAL,CIRCULAR,PERFECT_EXT,UNAMBIGUOUS_BP
1	16201781	16202574	5circ_001208	2	-	1	2	40	5	T01	2	0	0	1	GTAG	NA	ANCHOR_UNIQUE,CANONICAL,CIRCULAR,PERFECT_EXT,UNAMBIGUOUS_BP
22	38144895	38145653	5circ_001212	9	-	5	9	40	40	T01	9	0	0	1	GTAG	NA	ANCHOR_UNIQUE,CANONICAL,CIRCULAR,PERFECT_EXT,UNAMBIGUOUS_BP
X	77988241	78009263	5circ_001213	4	+	2	4	5	40	T01	4	0	0	1	GTAG	NA	ANCHOR_UNIQUE,CANONICAL,CIRCULAR,PERFECT_EXT,UNAMBIGUOUS_BP
2	61481184	61484105	5circ_001215	2	-	1	2	5	5	T01	2	0	0	1	GTAG	NA	ANCHOR_UNIQUE,CANONICAL,CIRCULAR,PERFECT_EXT,UNAMBIGUOUS_BP
8	47836337	47837419	5circ_001216	3	-	3	3	40	40	T01	3	0	0	1	GTAG	NA	ANCHOR_UNIQUE,CANONICAL,CIRCULAR,PERFECT_EXT,UNAMBIGUOUS_BP
21	36247516	36251284	5circ_001217	10	+	8	9	40	40	T01	10	0	0	1	GTAG	NA	ANCHOR_UNIQUE,CANONICAL,CIRCULAR,PERFECT_EXT,UNAMBIGUOUS_BP
19	38843513	38843841	5circ_001218	2	-	2	2	40	40	T01	2	0	0	1	GTAG	NA	ANCHOR_UNIQUE,CANONICAL,CIRCULAR,PERFECT_EXT,UNAMBIGUOUS_BP
12	112204485	112226820	5circ_001219	2	-	1	2	40	5	T01	2	0	0	1	GTAG	NA	ANCHOR_UNIQUE,CANONICAL,CIRCULAR,PERFECT_EXT,UNAMBIGUOUS_BP
19	5921200	5925737	5circ_001220	6	-	2	6	40	40	T01	6	0	0	1	GTAG	NA	ANCHOR_UNIQUE,CANONICAL,CIRCULAR,PERFECT_EXT,UNAMBIGUOUS_BP
3	41222032	41239354	5circ_001221	3	+	2	2	5	40	T01	3	0	0	1	GTAG	NA	ANCHOR_UNIQUE,CANONICAL,CIRCULAR,PERFECT_EXT,UNAMBIGUOUS_BP
21	43903956	43959859	5circ_001222	4	+	1	4	5	40	T01	4	0	0	1	GTAG	NA	ANCHOR_UNIQUE,CANONICAL,CIRCULAR,PERFECT_EXT,UNAMBIGUOUS_BP
22	45793544	45807022	5circ_001225	15	+	6	15	40	40	T01	15	0	0	1	GTAG	NA	ANCHOR_UNIQUE,CANONICAL,CIRCULAR,PERFECT_EXT,UNAMBIGUOUS_BP
4	150761782	150831976	5circ_001227	2	-	2	1	5	40	T01	2	0	0	1	GTAG	NA	ANCHOR_UNIQUE,CANONICAL,CIRCULAR,PERFECT_EXT,UNAMBIGUOUS_BP
20	49066191	49075520	5circ_001228	4	+	2	4	5	37	T01	4	0	0	1	GTAG	NA	ANCHOR_UNIQUE,CANONICAL,CIRCULAR,PERFECT_EXT,UNAMBIGUOUS_BP
8	47953619	47957431	5circ_001229	3	-	2	3	40	35	T01	3	0	0	1	GTAG	NA	ANCHOR_UNIQUE,CANONICAL,CIRCULAR,PERFECT_EXT,UNAMBIGUOUS_BP
3	119500694	119517315	5circ_001230	5	+	3	5	40	40	T01	5	0	0	1	GTAG	NA	ANCHOR_UNIQUE,CANONICAL,CIRCULAR,PERFECT_EXT,UNAMBIGUOUS_BP
11	16071713	16111923	5circ_001232	13	-	3	13	40	40	T01	13	0	0	1	GTAG	NA	ANCHOR_UNIQUE,CANONICAL,CIRCULAR,PERFECT_EXT,UNAMBIGUOUS_BP
16	29974282	29986504	5circ_001235	2	+	2	2	40	40	T01	2	0	0	1	GTAG	NA	ANCHOR_UNIQUE,CANONICAL,CIRCULAR,PERFECT_EXT,UNAMBIGUOUS_BP
11	68544837	68558679	5circ_001237	6	+	2	6	40	40	T01	6	0	0	1	GTAG	NA	ANCHOR_UNIQUE,CANONICAL,CIRCULAR,PERFECT_EXT,UNAMBIGUOUS_BP
1	247860616	247864935	5circ_001239	2	+	1	2	5	40	T01	2	1	0	1	GTAG	NA	ANCHOR_UNIQUE,CANONICAL,CIRCULAR,GOOD_EXT,UNAMBIGUOUS_BP
10	96645472	96656934	5circ_001241	2	-	1	2	40	40	T01	2	0	0	1	GTAG	NA	ANCHOR_UNIQUE,CANONICAL,CIRCULAR,PERFECT_EXT,UNAMBIGUOUS_BP
22	29825086	29832342	5circ_001244	10	-	4	10	40	40	T01	10	0	0	1	GTAG	NA	ANCHOR_UNIQUE,CANONICAL,CIRCULAR,PERFECT_EXT,UNAMBIGUOUS_BP
22	39138635	39141436	5circ_001246	3	-	1	3	40	40	T01	3	0	0	1	GTAG	NA	ANCHOR_UNIQUE,CANONICAL,CIRCULAR,PERFECT_EXT,UNAMBIGUOUS_BP
1	179990506	179992221	5circ_001247	6	+	2	5	40	5	T01	6	0	0	1	GTAG	NA	ANCHOR_UNIQUE,CANONICAL,CIRCULAR,PERFECT_EXT,UNAMBIGUOUS_BP
17	82468763	82481211	5circ_001248	2	+	2	2	40	5	T01	2	0	0	1	GTAG	NA	ANCHOR_UNIQUE,CANONICAL,CIRCULAR,PERFECT_EXT,UNAMBIGUOUS_BP
12	94578393	94582538	5circ_001249	4	-	2	4	5	40	T01	4	0	0	1	GTAG	NA	ANCHOR_UNIQUE,CANONICAL,CIRCULAR,PERFECT_EXT,UNAMBIGUOUS_BP
2	61482379	61490776	5circ_001251	24	-	15	18	40	40	T01	24	0	0	1	GTAG	NA	ANCHOR_UNIQUE,CANONICAL,CIRCULAR,PERFECT_EXT,UNAMBIGUOUS_BP
19	18175039	18175697	5circ_001252	13	+	4	13	40	40	T01	13	0	0	1	GTAG	NA	ANCHOR_UNIQUE,CANONICAL,CIRCULAR,PERFECT_EXT,UNAMBIGUOUS_BP
19	51573209	51588078	5circ_001253	3	+	1	3	40	5	T01	3	1	0	1	GTAG	NA	ANCHOR_UNIQUE,CANONICAL,CIRCULAR,GOOD_EXT,UNAMBIGUOUS_BP
5	112234633	112266330	5circ_001254	4	-	2	4	40	40	T01	4	0	0	1	GTAG	NA	ANCHOR_UNIQUE,CANONICAL,CIRCULAR,PERFECT_EXT,UNAMBIGUOUS_BP
18	57562873	57573365	5circ_001255	6	-	3	6	40	40	T01	6	0	0	1	GTAG	NA	ANCHOR_UNIQUE,CANONICAL,CIRCULAR,PERFECT_EXT,UNAMBIGUOUS_BP
12	121654273	121659348	5circ_001256	6	-	2	6	40	40	T01	6	0	0	1	GTAG	NA	ANCHOR_UNIQUE,CANONICAL,CIRCULAR,PERFECT_EXT,UNAMBIGUOUS_BP
18	62539680	62550460	5circ_001257	13	+	8	12	40	40	T01	13	0	0	1	GTAG	NA	ANCHOR_UNIQUE,CANONICAL,CIRCULAR,PERFECT_EXT,UNAMBIGUOUS_BP
1	45640209	45642499	5circ_001261	531	-	93	521	40	40	T01	531	0	0	1	GTAG	NA	ANCHOR_UNIQUE,CANONICAL,CIRCULAR,PERFECT_EXT,UNAMBIGUOUS_BP
10	72340788	72341170	5circ_001262	8	-	3	8	40	40	T01	8	0	0	1	GTAG	NA	ANCHOR_UNIQUE,CANONICAL,CIRCULAR,PERFECT_EXT,UNAMBIGUOUS_BP
6	106279660	106308491	5circ_001263	4	-	1	4	5	35	T01	4	0	0	1	GTAG	NA	ANCHOR_UNIQUE,CANONICAL,CIRCULAR,PERFECT_EXT,UNAMBIGUOUS_BP
19	15268904	15273133	5circ_001264	5	-	2	5	40	40	T01	5	0	0	1	GTAG	NA	ANCHOR_UNIQUE,CANONICAL,CIRCULAR,PERFECT_EXT,UNAMBIGUOUS_BP
2	85322535	85326804	5circ_001266	2	-	1	2	5	40	T01	2	0	0	1	GTAG	NA	ANCHOR_UNIQUE,CANONICAL,CIRCULAR,PERFECT_EXT,UNAMBIGUOUS_BP
6	136778691	136779697	5circ_001268	2	+	1	2	40	40	T01	2	1	0	1	GTAG	NA	ANCHOR_UNIQUE,CANONICAL,CIRCULAR,GOOD_EXT,UNAMBIGUOUS_BP
16	18841564	18845651	5circ_001269	55	-	33	54	40	40	T01	55	0	0	1	GTAG	NA	ANCHOR_UNIQUE,CANONICAL,CIRCULAR,PERFECT_EXT,UNAMBIGUOUS_BP
4	102650536	102714561	5circ_001270	2	-	1	2	40	40	T01	2	0	0	1	GTAG	NA	ANCHOR_UNIQUE,CANONICAL,CIRCULAR,PERFECT_EXT,UNAMBIGUOUS_BP
4	88121634	88140014	5circ_001271	4	-	4	4	40	40	T01	4	0	0	1	GTAG	NA	ANCHOR_UNIQUE,CANONICAL,CIRCULAR,PERFECT_EXT,UNAMBIGUOUS_BP
1	9871186	9877989	5circ_001272	5	-	3	5	40	5	T01	5	0	0	1	GTAG	NA	ANCHOR_UNIQUE,CANONICAL,CIRCULAR,PERFECT_EXT,UNAMBIGUOUS_BP
7	129671428	129690546	5circ_001273	4	+	1	4	40	40	T01	4	0	0	1	GTAG	NA	ANCHOR_UNIQUE,CANONICAL,CIRCULAR,PERFECT_EXT,UNAMBIGUOUS_BP
9	112574056	112575251	5circ_001276	4	+	2	4	40	40	T01	4	0	0	1	GTAG	NA	ANCHOR_UNIQUE,CANONICAL,CIRCULAR,PERFECT_EXT,UNAMBIGUOUS_BP
8	132713994	132751997	5circ_001277	4	-	1	4	40	40	T01	4	0	0	1	GTAG	NA	ANCHOR_UNIQUE,CANONICAL,CIRCULAR,PERFECT_EXT,UNAMBIGUOUS_BP
5	138386021	138386621	5circ_001279	2	+	2	1	5	5	T01	2	0	0	1	GTAG	NA	ANCHOR_UNIQUE,CANONICAL,CIRCULAR,PERFECT_EXT,UNAMBIGUOUS_BP
3	148408419	148455531	5circ_001280	2	-	2	2	40	40	T01	2	0	0	1	GTAG	NA	ANCHOR_UNIQUE,CANONICAL,CIRCULAR,PERFECT_EXT,UNAMBIGUOUS_BP
17	47137151	47143982	5circ_001281	4	-	3	1	40	40	T01	4	0	0	1	GTAG	NA	ANCHOR_UNIQUE,CANONICAL,CIRCULAR,PERFECT_EXT,UNAMBIGUOUS_BP
19	8548035	8552164	5circ_001282	2	-	2	2	35	5	T01	2	0	0	1	GTAG	NA	ANCHOR_UNIQUE,CANONICAL,CIRCULAR,PERFECT_EXT,UNAMBIGUOUS_BP
10	17157440	17168917	5circ_001283	5	-	2	5	40	40	T01	5	0	0	1	GTAG	NA	ANCHOR_UNIQUE,CANONICAL,CIRCULAR,PERFECT_EXT,UNAMBIGUOUS_BP
5	41905357	41912183	5circ_001285	2	+	1	2	5	40	T01	2	0	0	1	GTAG	NA	ANCHOR_UNIQUE,CANONICAL,CIRCULAR,PERFECT_EXT,UNAMBIGUOUS_BP
8	99431536	99521010	5circ_001286	17	+	6	17	40	40	T01	17	0	0	1	GTAG	NA	ANCHOR_UNIQUE,CANONICAL,CIRCULAR,PERFECT_EXT,UNAMBIGUOUS_BP
14	99458278	99459185	5circ_001287	3	-	2	3	40	40	T01	3	0	0	1	GTAG	NA	ANCHOR_UNIQUE,CANONICAL,CIRCULAR,PERFECT_EXT,UNAMBIGUOUS_BP
20	49165996	49174269	5circ_001288	3	-	3	3	40	35	T01	3	0	0	1	GTAG	NA	ANCHOR_UNIQUE,CANONICAL,CIRCULAR,PERFECT_EXT,UNAMBIGUOUS_BP
8	41688510	41694803	5circ_001289	2	-	1	2	40	40	T01	2	0	0	1	GTAG	NA	ANCHOR_UNIQUE,CANONICAL,CIRCULAR,PERFECT_EXT,UNAMBIGUOUS_BP
1	41846553	41847152	5circ_001290	10	-	2	10	40	5	T01	10	0	0	1	GTAG	NA	ANCHOR_UNIQUE,CANONICAL,CIRCULAR,PERFECT_EXT,UNAMBIGUOUS_BP
1	45640209	45659142	5circ_001293	2	-	1	2	5	40	T01	2	0	0	1	GTAG	NA	ANCHOR_UNIQUE,CANONICAL,CIRCULAR,PERFECT_EXT,UNAMBIGUOUS_BP
17	78400676	78401106	5circ_001294	2	+	1	2	40	40	T01	2	2	0	1	GTAG	NA	ANCHOR_UNIQUE,CANONICAL,CIRCULAR,OK_EXT,UNAMBIGUOUS_BP
10	49474026	49493252	5circ_001296	2	-	2	2	40	40	T01	2	0	0	1	GTAG	NA	ANCHOR_UNIQUE,CANONICAL,CIRCULAR,PERFECT_EXT,UNAMBIGUOUS_BP
19	38607863	38608170	5circ_001297	3	-	1	3	40	5	T01	3	0	0	1	GTAG	NA	ANCHOR_UNIQUE,CANONICAL,CIRCULAR,PERFECT_EXT,UNAMBIGUOUS_BP
19	47355038	47355350	5circ_001299	2	+	1	2	40	40	T01	2	0	0	1	GTAG	NA	ANCHOR_UNIQUE,CANONICAL,CIRCULAR,PERFECT_EXT,UNAMBIGUOUS_BP
11	68567013	68576043	5circ_001300	6	+	4	5	40	40	T01	6	0	0	1	GTAG	NA	ANCHOR_UNIQUE,CANONICAL,CIRCULAR,PERFECT_EXT,UNAMBIGUOUS_BP
17	78160954	78161254	5circ_001301	5	+	4	5	35	40	T01	5	0	0	1	GTAG	NA	ANCHOR_UNIQUE,CANONICAL,CIRCULAR,PERFECT_EXT,UNAMBIGUOUS_BP
4	48556977	48561636	5circ_001302	5	-	2	5	40	40	T01	5	0	0	1	GTAG	NA	ANCHOR_UNIQUE,CANONICAL,CIRCULAR,PERFECT_EXT,UNAMBIGUOUS_BP
10	69359896	69369624	5circ_001303	3	+	2	3	40	40	T01	3	0	0	1	GTAG	NA	ANCHOR_UNIQUE,CANONICAL,CIRCULAR,PERFECT_EXT,UNAMBIGUOUS_BP
3	66405197	66417266	5circ_001304	4	-	2	4	40	40	T01	4	0	0	1	GTAG	NA	ANCHOR_UNIQUE,CANONICAL,CIRCULAR,PERFECT_EXT,UNAMBIGUOUS_BP
10	119515508	119530343	5circ_001305	3	-	1	3	40	5	T01	3	0	0	1	GTAG	NA	ANCHOR_UNIQUE,CANONICAL,CIRCULAR,PERFECT_EXT,UNAMBIGUOUS_BP
11	74132843	74139828	5circ_001306	9	-	4	9	40	40	T01	9	0	0	1	GTAG	NA	ANCHOR_UNIQUE,CANONICAL,CIRCULAR,PERFECT_EXT,UNAMBIGUOUS_BP
4	143994157	144002694	5circ_001308	3	-	3	2	5	5	T01	3	1	0	1	GTAG	NA	ANCHOR_UNIQUE,CANONICAL,CIRCULAR,GOOD_EXT,UNAMBIGUOUS_BP
17	76740956	76742273	5circ_001309	3	+	2	3	40	5	T01	3	0	0	1	GTAG	NA	ANCHOR_UNIQUE,CANONICAL,CIRCULAR,PERFECT_EXT,UNAMBIGUOUS_BP
1	155921374	155929840	5circ_001310	2	-	2	2	40	40	T01	2	0	0	1	GTAG	NA	ANCHOR_UNIQUE,CANONICAL,CIRCULAR,PERFECT_EXT,UNAMBIGUOUS_BP
22	41164052	41170571	5circ_001311	12	+	4	12	35	40	T01	12	0	0	1	GTAG	NA	ANCHOR_UNIQUE,CANONICAL,CIRCULAR,PERFECT_EXT,UNAMBIGUOUS_BP
19	39169531	39173376	5circ_001312	2	+	2	2	40	40	T01	2	0	0	1	GTAG	NA	ANCHOR_UNIQUE,CANONICAL,CIRCULAR,PERFECT_EXT,UNAMBIGUOUS_BP
17	21006895	21011309	5circ_001314	6	-	1	6	5	40	T01	6	0	0	1	GTAG	NA	ANCHOR_UNIQUE,CANONICAL,CIRCULAR,PERFECT_EXT,UNAMBIGUOUS_BP
6	118632452	118652808	5circ_001317	3	-	2	3	40	5	T01	3	0	0	1	GTAG	NA	ANCHOR_UNIQUE,CANONICAL,CIRCULAR,PERFECT_EXT,UNAMBIGUOUS_BP
3	37629383	37631062	5circ_001319	2	-	1	2	5	40	T01	2	1	0	1	GTAG	NA	ANCHOR_UNIQUE,CANONICAL,CIRCULAR,GOOD_EXT,UNAMBIGUOUS_BP
3	155914418	155919338	5circ_001320	4	+	2	4	40	40	T01	4	0	0	1	GTAG	NA	ANCHOR_UNIQUE,CANONICAL,CIRCULAR,PERFECT_EXT,UNAMBIGUOUS_BP
X	148529206	148529406	5circ_001321	2	+	2	2	40	5	T01	2	1	0	1	GTAG	NA	ANCHOR_UNIQUE,CANONICAL,CIRCULAR,GOOD_EXT,UNAMBIGUOUS_BP
14	21426127	21429335	5circ_001324	4	-	2	4	40	40	T01	4	0	0	1	GTAG	NA	ANCHOR_UNIQUE,CANONICAL,CIRCULAR,PERFECT_EXT,UNAMBIGUOUS_BP
19	47362475	47362693	5circ_001325	2	+	2	2	40	40	T01	2	0	0	1	GTAG	NA	ANCHOR_UNIQUE,CANONICAL,CIRCULAR,PERFECT_EXT,UNAMBIGUOUS_BP
19	2271384	2271954	5circ_001330	3	+	3	2	40	40	T01	3	0	0	1	GTAG	NA	ANCHOR_UNIQUE,CANONICAL,CIRCULAR,PERFECT_EXT,UNAMBIGUOUS_BP
4	47763378	47807047	5circ_001331	4	-	1	4	40	40	T01	4	0	0	1	GTAG	NA	ANCHOR_UNIQUE,CANONICAL,CIRCULAR,PERFECT_EXT,UNAMBIGUOUS_BP
12	89459637	89497342	5circ_001332	6	-	3	6	40	40	T01	6	0	0	1	GTAG	NA	ANCHOR_UNIQUE,CANONICAL,CIRCULAR,PERFECT_EXT,UNAMBIGUOUS_BP
15	23026115	23031020	5circ_001334	2	-	2	2	40	5	T01	2	0	0	1	GTAG	NA	ANCHOR_UNIQUE,CANONICAL,CIRCULAR,PERFECT_EXT,UNAMBIGUOUS_BP
8	42444645	42465917	5circ_001336	4	-	2	4	5	40	T01	4	0	0	1	GTAG	NA	ANCHOR_UNIQUE,CANONICAL,CIRCULAR,PERFECT_EXT,UNAMBIGUOUS_BP
17	46066536	46067667	5circ_001338	7	-	3	7	40	40	T01	7	0	0	1	GTAG	NA	ANCHOR_UNIQUE,CANONICAL,CIRCULAR,PERFECT_EXT,UNAMBIGUOUS_BP
9	111914604	111926496	5circ_001339	4	+	1	4	5	35	T01	4	0	0	1	GTAG	NA	ANCHOR_UNIQUE,CANONICAL,CIRCULAR,PERFECT_EXT,UNAMBIGUOUS_BP
15	58886974	58887540	5circ_001340	24	-	11	24	40	40	T01	24	0	0	1	GTAG	NA	ANCHOR_UNIQUE,CANONICAL,CIRCULAR,PERFECT_EXT,UNAMBIGUOUS_BP
2	210153494	210154590	5circ_001341	4	-	2	4	40	40	T01	4	1	0	1	GTAG	NA	ANCHOR_UNIQUE,CANONICAL,CIRCULAR,GOOD_EXT,UNAMBIGUOUS_BP
11	16183885	16186955	5circ_001344	49	-	19	49	40	40	T01	49	0	0	1	GTAG	NA	ANCHOR_UNIQUE,CANONICAL,CIRCULAR,PERFECT_EXT,UNAMBIGUOUS_BP
4	53425871	53428183	5circ_001345	57	+	24	55	40	40	T01	57	0	0	1	GTAG	NA	ANCHOR_UNIQUE,CANONICAL,CIRCULAR,PERFECT_EXT,UNAMBIGUOUS_BP
15	64118116	64118854	5circ_001346	4	+	2	4	40	40	T01	4	0	0	1	GTAG	NA	ANCHOR_UNIQUE,CANONICAL,CIRCULAR,PERFECT_EXT,UNAMBIGUOUS_BP
2	61495454	61502310	5circ_001347	6	-	2	6	40	40	T01	6	0	0	1	GTAG	NA	ANCHOR_UNIQUE,CANONICAL,CIRCULAR,PERFECT_EXT,UNAMBIGUOUS_BP
20	50127974	50130941	5circ_001348	3	-	2	3	5	5	T01	3	0	0	1	GTAG	NA	ANCHOR_UNIQUE,CANONICAL,CIRCULAR,PERFECT_EXT,UNAMBIGUOUS_BP
16	48252224	48258740	5circ_001349	5	+	1	5	40	5	T01	5	0	0	1	GTAG	NA	ANCHOR_UNIQUE,CANONICAL,CIRCULAR,PERFECT_EXT,UNAMBIGUOUS_BP
18	47091173	47097404	5circ_001350	4	-	1	4	40	5	T01	4	0	0	1	GTAG	NA	ANCHOR_UNIQUE,CANONICAL,CIRCULAR,PERFECT_EXT,UNAMBIGUOUS_BP
3	32395191	32442013	5circ_001352	2	+	1	2	40	40	T01	2	0	0	1	GTAG	NA	ANCHOR_UNIQUE,CANONICAL,CIRCULAR,PERFECT_EXT,UNAMBIGUOUS_BP
15	77252366	77284030	5circ_001353	2	-	2	2	40	5	T01	2	1	0	1	GTAG	NA	ANCHOR_UNIQUE,CANONICAL,CIRCULAR,GOOD_EXT,UNAMBIGUOUS_BP
7	107281299	107298346	5circ_001354	3	-	2	3	40	40	T01	3	0	0	1	GTAG	NA	ANCHOR_UNIQUE,CANONICAL,CIRCULAR,PERFECT_EXT,UNAMBIGUOUS_BP
12	108792285	108792829	5circ_001355	4	-	2	4	5	40	T01	4	0	0	1	GTAG	NA	ANCHOR_UNIQUE,CANONICAL,CIRCULAR,PERFECT_EXT,UNAMBIGUOUS_BP
16	28152658	28156527	5circ_001356	9	-	6	4	5	40	T01	9	0	0	1	GTAG	NA	ANCHOR_UNIQUE,CANONICAL,CIRCULAR,PERFECT_EXT,UNAMBIGUOUS_BP
2	171448680	171473975	5circ_001357	5	+	2	5	40	5	T01	5	0	0	1	GTAG	NA	ANCHOR_UNIQUE,CANONICAL,CIRCULAR,PERFECT_EXT,UNAMBIGUOUS_BP
15	63713352	63734849	5circ_001358	3	-	1	3	40	40	T01	3	0	0	1	GTAG	NA	ANCHOR_UNIQUE,CANONICAL,CIRCULAR,PERFECT_EXT,UNAMBIGUOUS_BP
4	73090666	73092300	5circ_001359	49	-	11	49	40	40	T01	49	0	0	1	GTAG	NA	ANCHOR_UNIQUE,CANONICAL,CIRCULAR,PERFECT_EXT,UNAMBIGUOUS_BP
6	24428974	24437289	5circ_001360	3	-	1	3	5	35	T01	3	0	0	1	GTAG	NA	ANCHOR_UNIQUE,CANONICAL,CIRCULAR,PERFECT_EXT,UNAMBIGUOUS_BP
3	195872275	195888606	5circ_001361	5	-	2	5	40	35	T01	5	0	0	1	GTAG	NA	ANCHOR_UNIQUE,CANONICAL,CIRCULAR,PERFECT_EXT,UNAMBIGUOUS_BP
11	36400996	36437476	5circ_001362	4	+	1	4	40	40	T01	4	0	2	1	GTAG	NA	ANCHOR_UNIQUE,CANONICAL,CIRCULAR,OK_EXT,UNAMBIGUOUS_BP
12	123395046	123396432	5circ_001363	2	+	2	2	5	40	T01	2	0	0	1	GTAG	NA	ANCHOR_UNIQUE,CANONICAL,CIRCULAR,PERFECT_EXT,UNAMBIGUOUS_BP
2	64569091	64573068	5circ_001364	10	+	7	9	40	40	T01	10	0	0	1	GTAG	NA	ANCHOR_UNIQUE,CANONICAL,CIRCULAR,PERFECT_EXT,UNAMBIGUOUS_BP
4	153602151	153604430	5circ_001365	3	+	3	3	40	5	T01	3	0	0	1	GTAG	NA	ANCHOR_UNIQUE,CANONICAL,CIRCULAR,PERFECT_EXT,UNAMBIGUOUS_BP
5	140538275	140538800	5circ_001366	4	-	1	4	5	5	T01	4	1	0	1	GTAG	NA	ANCHOR_UNIQUE,CANONICAL,CIRCULAR,GOOD_EXT,UNAMBIGUOUS_BP
10	98430570	98431291	5circ_001367	3	-	1	3	5	5	T01	3	0	0	1	GTAG	NA	ANCHOR_UNIQUE,CANONICAL,CIRCULAR,PERFECT_EXT,UNAMBIGUOUS_BP
20	64086374	64086788	5circ_001370	2	-	1	2	5	40	T01	2	2	0	1	GTAG	NA	ANCHOR_UNIQUE,CANONICAL,CIRCULAR,OK_EXT,UNAMBIGUOUS_BP
22	41135812	41140257	5circ_001371	48	+	21	48	40	40	T01	48	0	0	1	GTAG	NA	ANCHOR_UNIQUE,CANONICAL,CIRCULAR,PERFECT_EXT,UNAMBIGUOUS_BP
2	39056701	39058804	5circ_001372	2	-	2	2	5	40	T01	2	0	0	1	GTAG	NA	ANCHOR_UNIQUE,CANONICAL,CIRCULAR,PERFECT_EXT,UNAMBIGUOUS_BP
19	17781230	17781820	5circ_001373	2	+	1	2	5	35	T01	2	0	0	1	GTAG	NA	ANCHOR_UNIQUE,CANONICAL,CIRCULAR,PERFECT_EXT,UNAMBIGUOUS_BP
17	74762011	74763520	5circ_001374	6	+	2	6	40	40	T01	6	0	0	1	GTAG	NA	ANCHOR_UNIQUE,CANONICAL,CIRCULAR,PERFECT_EXT,UNAMBIGUOUS_BP
2	128145802	128153947	5circ_001375	6	+	2	6	5	40	T01	6	0	0	1	GTAG	NA	ANCHOR_UNIQUE,CANONICAL,CIRCULAR,PERFECT_EXT,UNAMBIGUOUS_BP
9	94415157	94441099	5circ_001376	9	+	2	9	5	40	T01	9	0	0	1	GTAG	NA	ANCHOR_UNIQUE,CANONICAL,CIRCULAR,PERFECT_EXT,UNAMBIGUOUS_BP
12	107739382	107746424	5circ_001377	2	-	1	2	40	35	T01	2	0	0	1	GTAG	NA	ANCHOR_UNIQUE,CANONICAL,CIRCULAR,PERFECT_EXT,UNAMBIGUOUS_BP
11	65605760	65608448	5circ_001379	12	-	4	12	40	40	T01	12	0	0	1	GTAG	NA	ANCHOR_UNIQUE,CANONICAL,CIRCULAR,PERFECT_EXT,UNAMBIGUOUS_BP
8	52673844	52674269	5circ_001380	3	-	1	3	40	5	T01	3	0	0	1	GTAG	NA	ANCHOR_UNIQUE,CANONICAL,CIRCULAR,PERFECT_EXT,UNAMBIGUOUS_BP
8	99384207	99442635	5circ_001381	2	+	2	2	40	40	T01	2	0	0	1	GTAG	NA	ANCHOR_UNIQUE,CANONICAL,CIRCULAR,PERFECT_EXT,UNAMBIGUOUS_BP
6	89722954	89725396	5circ_001383	4	-	2	4	40	40	T01	4	0	0	1	GTAG	NA	ANCHOR_UNIQUE,CANONICAL,CIRCULAR,PERFECT_EXT,UNAMBIGUOUS_BP
14	75100991	75103997	5circ_001384	12	-	9	12	40	40	T01	12	0	0	1	GTAG	NA	ANCHOR_UNIQUE,CANONICAL,CIRCULAR,PERFECT_EXT,UNAMBIGUOUS_BP
6	63788104	63789224	5circ_001385	2	-	1	2	5	40	T01	2	0	0	1	GTAG	NA	ANCHOR_UNIQUE,CANONICAL,CIRCULAR,PERFECT_EXT,UNAMBIGUOUS_BP
18	9583116	9595153	5circ_001386	15	-	6	14	40	40	T01	15	0	0	1	GTAG	NA	ANCHOR_UNIQUE,CANONICAL,CIRCULAR,PERFECT_EXT,UNAMBIGUOUS_BP
1	91861470	91864279	5circ_001387	18	-	4	18	40	40	T01	18	0	0	1	GTAG	NA	ANCHOR_UNIQUE,CANONICAL,CIRCULAR,PERFECT_EXT,UNAMBIGUOUS_BP
2	24564294	24593721	5circ_001388	3	+	2	3	40	40	T01	3	0	0	1	GTAG	NA	ANCHOR_UNIQUE,CANONICAL,CIRCULAR,PERFECT_EXT,UNAMBIGUOUS_BP
12	405510	418636	5circ_001390	5	+	2	5	40	40	T01	5	0	0	1	GTAG	NA	ANCHOR_UNIQUE,CANONICAL,CIRCULAR,PERFECT_EXT,UNAMBIGUOUS_BP
15	74655732	74677022	5circ_001391	2	-	1	2	40	5	T01	2	0	0	1	GTAG	NA	ANCHOR_UNIQUE,CANONICAL,CIRCULAR,PERFECT_EXT,UNAMBIGUOUS_BP
3	53497151	53501720	5circ_001392	5	+	2	5	40	40	T01	5	0	0	1	GTAG	NA	ANCHOR_UNIQUE,CANONICAL,CIRCULAR,PERFECT_EXT,UNAMBIGUOUS_BP
13	114040999	114073837	5circ_001393	23	-	11	23	40	40	T01	23	0	0	1	GTAG	NA	ANCHOR_UNIQUE,CANONICAL,CIRCULAR,PERFECT_EXT,UNAMBIGUOUS_BP
22	50372019	50394135	5circ_001394	45	+	18	45	40	40	T01	45	0	0	1	GTAG	NA	ANCHOR_UNIQUE,CANONICAL,CIRCULAR,PERFECT_EXT,UNAMBIGUOUS_BP
15	67231813	67236820	5circ_001397	5	-	4	5	40	40	T01	5	0	0	1	GTAG	NA	ANCHOR_UNIQUE,CANONICAL,CIRCULAR,PERFECT_EXT,UNAMBIGUOUS_BP
4	128017357	128021238	5circ_001398	8	+	2	8	40	40	T01	8	0	0	1	GTAG	NA	ANCHOR_UNIQUE,CANONICAL,CIRCULAR,PERFECT_EXT,UNAMBIGUOUS_BP
11	108329020	108332037	5circ_001401	2	+	1	2	5	5	T01	2	1	0	1	GTAG	NA	ANCHOR_UNIQUE,CANONICAL,CIRCULAR,GOOD_EXT,UNAMBIGUOUS_BP
5	131489545	131562047	5circ_001402	3	-	2	2	5	40	T01	3	0	0	1	GTAG	NA	ANCHOR_UNIQUE,CANONICAL,CIRCULAR,PERFECT_EXT,UNAMBIGUOUS_BP
12	2920762	2922402	5circ_001403	2	+	2	2	40	5	T01	2	0	0	1	GTAG	NA	ANCHOR_UNIQUE,CANONICAL,CIRCULAR,PERFECT_EXT,UNAMBIGUOUS_BP
16	27528597	27538356	5circ_001404	4	-	2	4	40	40	T01	4	0	0	1	GTAG	NA	ANCHOR_UNIQUE,CANONICAL,CIRCULAR,PERFECT_EXT,UNAMBIGUOUS_BP
6	42066311	42077239	5circ_001405	6	+	2	6	40	35	T01	6	0	0	1	GTAG	NA	ANCHOR_UNIQUE,CANONICAL,CIRCULAR,PERFECT_EXT,UNAMBIGUOUS_BP
12	120557281	120563943	5circ_001406	3	+	1	3	40	40	T01	3	0	0	1	GTAG	NA	ANCHOR_UNIQUE,CANONICAL,CIRCULAR,PERFECT_EXT,UNAMBIGUOUS_BP
13	41811224	41819386	5circ_001407	18	-	6	17	40	40	T01	18	0	0	1	GTAG	NA	ANCHOR_UNIQUE,CANONICAL,CIRCULAR,PERFECT_EXT,UNAMBIGUOUS_BP
22	42209650	42215341	5circ_001410	2	-	2	2	40	40	T01	2	0	0	1	GTAG	NA	ANCHOR_UNIQUE,CANONICAL,CIRCULAR,PERFECT_EXT,UNAMBIGUOUS_BP
1	155239615	155240077	5circ_001411	7	-	3	3	40	40	T01	7	0	0	1	GTAG	NA	ANCHOR_UNIQUE,CANONICAL,CIRCULAR,PERFECT_EXT,UNAMBIGUOUS_BP
6	97254556	97269992	5circ_001412	7	-	5	7	40	40	T01	7	0	0	1	GTAG	NA	ANCHOR_UNIQUE,CANONICAL,CIRCULAR,PERFECT_EXT,UNAMBIGUOUS_BP
3	170163026	170178938	5circ_001413	3	-	1	3	5	40	T01	3	0	0	1	GTAG	NA	ANCHOR_UNIQUE,CANONICAL,CIRCULAR,PERFECT_EXT,UNAMBIGUOUS_BP
1	155007088	155008286	5circ_001414	2	+	1	2	40	40	T01	2	1	0	1	GTAG	NA	ANCHOR_UNIQUE,CANONICAL,CIRCULAR,GOOD_EXT,UNAMBIGUOUS_BP
7	107146307	107153251	5circ_001415	4	+	1	4	40	40	T01	4	0	0	1	GTAG	NA	ANCHOR_UNIQUE,CANONICAL,CIRCULAR,PERFECT_EXT,UNAMBIGUOUS_BP
3	10270130	10271015	5circ_001417	7	+	2	7	5	5	T01	7	0	0	1	GTAG	NA	ANCHOR_UNIQUE,CANONICAL,CIRCULAR,PERFECT_EXT,UNAMBIGUOUS_BP
19	33112485	33126733	5circ_001418	3	+	2	3	40	40	T01	3	0	0	1	GTAG	NA	ANCHOR_UNIQUE,CANONICAL,CIRCULAR,PERFECT_EXT,UNAMBIGUOUS_BP
8	70138202	70144848	5circ_001420	13	-	2	13	40	40	T01	13	0	0	1	GTAG	NA	ANCHOR_UNIQUE,CANONICAL,CIRCULAR,PERFECT_EXT,UNAMBIGUOUS_BP
7	107324439	107412632	5circ_001421	8	-	2	8	5	40	T01	8	0	0	1	GTAG	NA	ANCHOR_UNIQUE,CANONICAL,CIRCULAR,PERFECT_EXT,UNAMBIGUOUS_BP
8	140664916	140674404	5circ_001422	2	-	1	2	5	5	T01	2	0	0	1	GTAG	NA	ANCHOR_UNIQUE,CANONICAL,CIRCULAR,PERFECT_EXT,UNAMBIGUOUS_BP
20	63926541	63931022	5circ_001423	4	+	3	4	40	40	T01	4	0	0	1	GTAG	NA	ANCHOR_UNIQUE,CANONICAL,CIRCULAR,PERFECT_EXT,UNAMBIGUOUS_BP
2	53919150	53928303	5circ_001424	2	-	2	2	40	40	T01	2	0	0	1	GTAG	NA	ANCHOR_UNIQUE,CANONICAL,CIRCULAR,PERFECT_EXT,UNAMBIGUOUS_BP
16	47463898	47547548	5circ_001425	4	+	3	4	40	40	T01	4	0	0	1	GTAG	NA	ANCHOR_UNIQUE,CANONICAL,CIRCULAR,PERFECT_EXT,UNAMBIGUOUS_BP
17	42720272	42727763	5circ_001426	3	-	1	3	5	5	T01	3	0	0	1	GTAG	NA	ANCHOR_UNIQUE,CANONICAL,CIRCULAR,PERFECT_EXT,UNAMBIGUOUS_BP
21	37472683	37480826	5circ_001427	3	+	2	3	40	40	T01	3	0	0	1	GTAG	NA	ANCHOR_UNIQUE,CANONICAL,CIRCULAR,PERFECT_EXT,UNAMBIGUOUS_BP
15	41748636	41750615	5circ_001428	10	+	5	10	40	40	T01	10	0	0	1	GTAG	NA	ANCHOR_UNIQUE,CANONICAL,CIRCULAR,PERFECT_EXT,UNAMBIGUOUS_BP
9	112268048	112276013	5circ_001431	4	-	3	4	40	40	T01	4	0	0	1	GTAG	NA	ANCHOR_UNIQUE,CANONICAL,CIRCULAR,PERFECT_EXT,UNAMBIGUOUS_BP
16	27346466	27355907	5circ_001432	6	+	3	6	40	40	T01	6	0	0	1	GTAG	NA	ANCHOR_UNIQUE,CANONICAL,CIRCULAR,PERFECT_EXT,UNAMBIGUOUS_BP
19	39877662	39893527	5circ_001435	15	-	6	7	5	5	T01	15	0	0	1	GTAG	NA	ANCHOR_UNIQUE,CANONICAL,CIRCULAR,PERFECT_EXT,UNAMBIGUOUS_BP
14	69767146	69769251	5circ_001436	2	+	1	2	40	40	T01	2	0	0	1	GTAG	NA	ANCHOR_UNIQUE,CANONICAL,CIRCULAR,PERFECT_EXT,UNAMBIGUOUS_BP
4	76134174	76144473	5circ_001437	7	-	4	5	5	5	T01	7	0	0	1	GTAG	NA	ANCHOR_UNIQUE,CANONICAL,CIRCULAR,PERFECT_EXT,UNAMBIGUOUS_BP
X	155506897	155537118	5circ_001438	2	-	1	2	5	5	T01	2	1	0	1	GTAG	NA	ANCHOR_UNIQUE,CANONICAL,CIRCULAR,GOOD_EXT,UNAMBIGUOUS_BP
8	51845660	51861246	5circ_001439	2	-	1	2	40	4	T01	2	0	0	1	GTAG	NA	ANCHOR_UNIQUE,CANONICAL,CIRCULAR,PERFECT_EXT,UNAMBIGUOUS_BP
1	112917177	112929352	5circ_001441	4	-	3	4	5	40	T01	4	0	0	1	GTAG	NA	ANCHOR_UNIQUE,CANONICAL,CIRCULAR,PERFECT_EXT,UNAMBIGUOUS_BP
8	41725760	41728006	5circ_001443	2	-	1	2	40	40	T01	2	1	0	1	GTAG	NA	ANCHOR_UNIQUE,CANONICAL,CIRCULAR,GOOD_EXT,UNAMBIGUOUS_BP
1	10117458	10135186	5circ_001444	3	+	1	3	40	40	T01	3	0	0	1	GTAG	NA	ANCHOR_UNIQUE,CANONICAL,CIRCULAR,PERFECT_EXT,UNAMBIGUOUS_BP
15	60505507	60511621	5circ_001445	6	-	2	6	40	5	T01	6	0	0	1	GTAG	NA	ANCHOR_UNIQUE,CANONICAL,CIRCULAR,PERFECT_EXT,UNAMBIGUOUS_BP
1	100439931	100462881	5circ_001446	2	+	2	2	40	40	T01	2	0	0	1	GTAG	NA	ANCHOR_UNIQUE,CANONICAL,CIRCULAR,PERFECT_EXT,UNAMBIGUOUS_BP
2	226839408	226914351	5circ_001447	4	+	3	4	40	40	T01	4	0	0	1	GTAG	NA	ANCHOR_UNIQUE,CANONICAL,CIRCULAR,PERFECT_EXT,UNAMBIGUOUS_BP
17	7343378	7344648	5circ_001448	7	+	3	6	40	40	T01	7	0	0	1	GTAG	NA	ANCHOR_UNIQUE,CANONICAL,CIRCULAR,PERFECT_EXT,UNAMBIGUOUS_BP
17	40053297	40053635	5circ_001449	3	-	1	3	40	40	T01	3	0	0	1	GTAG	NA	ANCHOR_UNIQUE,CANONICAL,CIRCULAR,PERFECT_EXT,UNAMBIGUOUS_BP
2	158603069	158625427	5circ_001451	2	+	1	2	5	40	T01	2	0	0	1	GTAG	NA	ANCHOR_UNIQUE,CANONICAL,CIRCULAR,PERFECT_EXT,UNAMBIGUOUS_BP
2	48498492	48515834	5circ_001453	3	+	2	3	5	40	T01	3	0	0	1	GTAG	NA	ANCHOR_UNIQUE,CANONICAL,CIRCULAR,PERFECT_EXT,UNAMBIGUOUS_BP
15	33944397	33947113	5circ_001454	2	-	2	2	5	5	T01	2	0	0	1	GTAG	NA	ANCHOR_UNIQUE,CANONICAL,CIRCULAR,PERFECT_EXT,UNAMBIGUOUS_BP
15	94367604	94385525	5circ_001455	20	+	8	20	40	40	T01	20	0	0	1	GTAG	NA	ANCHOR_UNIQUE,CANONICAL,CIRCULAR,PERFECT_EXT,UNAMBIGUOUS_BP
1	42929209	42931206	5circ_001457	7	-	3	7	5	40	T01	7	0	0	1	GTAG	NA	ANCHOR_UNIQUE,CANONICAL,CIRCULAR,PERFECT_EXT,UNAMBIGUOUS_BP
15	73560897	73592069	5circ_001462	2	-	1	2	5	40	T01	2	0	0	1	GTAG	NA	ANCHOR_UNIQUE,CANONICAL,CIRCULAR,PERFECT_EXT,UNAMBIGUOUS_BP
X	44931937	44945523	5circ_001463	4	+	2	4	40	40	T01	4	0	0	1	GTAG	NA	ANCHOR_UNIQUE,CANONICAL,CIRCULAR,PERFECT_EXT,UNAMBIGUOUS_BP
11	125602302	125608289	5circ_001466	11	+	3	11	40	40	T01	11	0	0	1	GTAG	NA	ANCHOR_UNIQUE,CANONICAL,CIRCULAR,PERFECT_EXT,UNAMBIGUOUS_BP
13	25307805	25327512	5circ_001467	3	+	1	3	5	5	T01	3	0	0	1	GTAG	NA	ANCHOR_UNIQUE,CANONICAL,CIRCULAR,PERFECT_EXT,UNAMBIGUOUS_BP
1	20744743	20773610	5circ_001469	5	-	4	4	5	40	T01	5	0	0	1	GTAG	NA	ANCHOR_UNIQUE,CANONICAL,CIRCULAR,PERFECT_EXT,UNAMBIGUOUS_BP
13	112868994	112869952	5circ_001470	2	+	2	2	5	40	T01	2	2	0	1	GTAG	NA	ANCHOR_UNIQUE,CANONICAL,CIRCULAR,OK_EXT,UNAMBIGUOUS_BP
1	222715683	222722514	5circ_001471	4	+	2	4	40	35	T01	4	0	0	1	GTAG	NA	ANCHOR_UNIQUE,CANONICAL,CIRCULAR,PERFECT_EXT,UNAMBIGUOUS_BP
1	40450655	40462597	5circ_001472	6	+	3	6	40	40	T01	6	0	0	1	GTAG	NA	ANCHOR_UNIQUE,CANONICAL,CIRCULAR,PERFECT_EXT,UNAMBIGUOUS_BP
1	36361220	36368084	5circ_001474	3	-	1	3	5	40	T01	3	0	0	1	GTAG	NA	ANCHOR_UNIQUE,CANONICAL,CIRCULAR,PERFECT_EXT,UNAMBIGUOUS_BP
11	43399887	43414776	5circ_001475	3	+	3	3	40	40	T01	3	0	0	1	GTAG	NA	ANCHOR_UNIQUE,CANONICAL,CIRCULAR,PERFECT_EXT,UNAMBIGUOUS_BP
16	71986220	71990329	5circ_001476	11	-	3	11	40	5	T01	11	0	0	1	GTAG	NA	ANCHOR_UNIQUE,CANONICAL,CIRCULAR,PERFECT_EXT,UNAMBIGUOUS_BP
1	88770351	88786213	5circ_001477	9	+	2	9	40	40	T01	9	0	0	1	GTAG	NA	ANCHOR_UNIQUE,CANONICAL,CIRCULAR,PERFECT_EXT,UNAMBIGUOUS_BP
4	75012424	75013150	5circ_001478	3	+	1	3	40	5	T01	3	0	0	1	GTAG	NA	ANCHOR_UNIQUE,CANONICAL,CIRCULAR,PERFECT_EXT,UNAMBIGUOUS_BP
8	690969	692612	5circ_001479	2	-	2	2	40	40	T01	2	0	0	1	GTAG	NA	ANCHOR_UNIQUE,CANONICAL,CIRCULAR,PERFECT_EXT,UNAMBIGUOUS_BP
3	151409242	151416422	5circ_001480	2	+	2	1	40	5	T01	2	0	0	1	GTAG	NA	ANCHOR_UNIQUE,CANONICAL,CIRCULAR,PERFECT_EXT,UNAMBIGUOUS_BP
2	29121373	29181697	5circ_001481	2	+	1	2	40	5	T01	2	0	0	1	GTAG	NA	ANCHOR_UNIQUE,CANONICAL,CIRCULAR,PERFECT_EXT,UNAMBIGUOUS_BP
4	102714437	102734571	5circ_001482	7	-	3	6	5	40	T01	7	0	0	1	GTAG	NA	ANCHOR_UNIQUE,CANONICAL,CIRCULAR,PERFECT_EXT,UNAMBIGUOUS_BP
14	101925799	101926913	5circ_001483	6	-	2	6	40	40	T01	6	1	0	1	GTAG	NA	ANCHOR_UNIQUE,CANONICAL,CIRCULAR,GOOD_EXT,UNAMBIGUOUS_BP
11	47358843	47360040	5circ_001484	155	-	44	149	40	40	T01	155	0	0	1	GTAG	NA	ANCHOR_UNIQUE,CANONICAL,CIRCULAR,PERFECT_EXT,UNAMBIGUOUS_BP
5	79619611	79645192	5circ_001485	2	+	2	2	40	5	T01	2	0	0	1	GTAG	NA	ANCHOR_UNIQUE,CANONICAL,CIRCULAR,PERFECT_EXT,UNAMBIGUOUS_BP
7	6578500	6583431	5circ_001486	3	+	3	3	40	35	T01	3	0	0	1	GTAG	NA	ANCHOR_UNIQUE,CANONICAL,CIRCULAR,PERFECT_EXT,UNAMBIGUOUS_BP
17	281767	327579	5circ_001487	6	-	2	6	40	40	T01	6	0	0	1	GTAG	NA	ANCHOR_UNIQUE,CANONICAL,CIRCULAR,PERFECT_EXT,UNAMBIGUOUS_BP
16	70556885	70567536	5circ_001488	2	+	1	2	40	5	T01	2	0	0	1	GTAG	NA	ANCHOR_UNIQUE,CANONICAL,CIRCULAR,PERFECT_EXT,UNAMBIGUOUS_BP
2	32509737	32575366	5circ_001489	2	+	2	2	40	40	T01	2	0	0	1	GTAG	NA	ANCHOR_UNIQUE,CANONICAL,CIRCULAR,PERFECT_EXT,UNAMBIGUOUS_BP
17	81270917	81277133	5circ_001490	2	-	1	2	40	40	T01	2	0	0	1	GTAG	NA	ANCHOR_UNIQUE,CANONICAL,CIRCULAR,PERFECT_EXT,UNAMBIGUOUS_BP
1	155921374	155925843	5circ_001491	7	-	3	7	40	40	T01	7	0	0	1	GTAG	NA	ANCHOR_UNIQUE,CANONICAL,CIRCULAR,PERFECT_EXT,UNAMBIGUOUS_BP
1	179347599	179351462	5circ_001493	5	+	5	4	40	40	T01	5	0	0	1	GTAG	NA	ANCHOR_UNIQUE,CANONICAL,CIRCULAR,PERFECT_EXT,UNAMBIGUOUS_BP
19	1042745	1043841	5circ_001494	4	+	1	4	5	40	T01	4	0	0	1	GTAG	NA	ANCHOR_UNIQUE,CANONICAL,CIRCULAR,PERFECT_EXT,UNAMBIGUOUS_BP
17	61982197	61995365	5circ_001495	9	-	3	9	40	5	T01	9	0	0	1	GTAG	NA	ANCHOR_UNIQUE,CANONICAL,CIRCULAR,PERFECT_EXT,UNAMBIGUOUS_BP
16	69314617	69315069	5circ_001496	2	-	1	2	40	40	T01	2	1	0	1	GTAG	NA	ANCHOR_UNIQUE,CANONICAL,CIRCULAR,GOOD_EXT,UNAMBIGUOUS_BP
15	63754504	63756748	5circ_001497	3	-	1	3	5	40	T01	3	0	0	1	GTAG	NA	ANCHOR_UNIQUE,CANONICAL,CIRCULAR,PERFECT_EXT,UNAMBIGUOUS_BP
6	144490070	144493456	5circ_001498	7	+	4	7	40	40	T01	7	0	0	1	GTAG	NA	ANCHOR_UNIQUE,CANONICAL,CIRCULAR,PERFECT_EXT,UNAMBIGUOUS_BP
6	3076763	3085408	5circ_001499	2	+	1	2	5	5	T01	2	0	0	1	GTAG	NA	ANCHOR_UNIQUE,CANONICAL,CIRCULAR,PERFECT_EXT,UNAMBIGUOUS_BP
16	92595	93325	5circ_001500	17	-	5	17	40	40	T01	17	0	0	1	GTAG	NA	ANCHOR_UNIQUE,CANONICAL,CIRCULAR,PERFECT_EXT,UNAMBIGUOUS_BP
20	44479984	44480444	5circ_001501	17	+	9	14	40	40	T01	17	0	0	1	GTAG	NA	ANCHOR_UNIQUE,CANONICAL,CIRCULAR,PERFECT_EXT,UNAMBIGUOUS_BP
8	141151618	141155970	5circ_001502	23	+	7	22	40	40	T01	23	0	0	1	GTAG	NA	ANCHOR_UNIQUE,CANONICAL,CIRCULAR,PERFECT_EXT,UNAMBIGUOUS_BP
15	65729071	65732818	5circ_001504	16	-	5	16	40	5	T01	16	0	0	1	GTAG	NA	ANCHOR_UNIQUE,CANONICAL,CIRCULAR,PERFECT_EXT,UNAMBIGUOUS_BP
6	25604811	25606273	5circ_001508	4	+	2	4	40	40	T01	4	0	0	1	GTAG	NA	ANCHOR_UNIQUE,CANONICAL,CIRCULAR,PERFECT_EXT,UNAMBIGUOUS_BP
5	96781057	96783235	5circ_001510	2	-	1	2	40	40	T01	2	0	0	1	GTAG	NA	ANCHOR_UNIQUE,CANONICAL,CIRCULAR,PERFECT_EXT,UNAMBIGUOUS_BP
4	98476188	98486884	5circ_001511	4	-	1	4	40	40	T01	4	0	0	1	GTAG	NA	ANCHOR_UNIQUE,CANONICAL,CIRCULAR,PERFECT_EXT,UNAMBIGUOUS_BP
8	97713661	97723035	5circ_001512	2	+	2	2	40	40	T01	2	0	0	1	GTAG	NA	ANCHOR_UNIQUE,CANONICAL,CIRCULAR,PERFECT_EXT,UNAMBIGUOUS_BP
20	47276313	47287284	5circ_001513	46	-	17	41	40	40	T01	46	0	0	1	GTAG	NA	ANCHOR_UNIQUE,CANONICAL,CIRCULAR,PERFECT_EXT,UNAMBIGUOUS_BP
22	49797804	49804360	5circ_001516	8	-	1	8	5	35	T01	8	0	0	1	GTAG	NA	ANCHOR_UNIQUE,CANONICAL,CIRCULAR,PERFECT_EXT,UNAMBIGUOUS_BP
3	184317320	184317816	5circ_001517	2	+	2	2	40	40	T01	2	0	0	1	GTAG	NA	ANCHOR_UNIQUE,CANONICAL,CIRCULAR,PERFECT_EXT,UNAMBIGUOUS_BP
6	119506913	119550395	5circ_001518	4	+	2	4	5	5	T01	4	0	0	1	GTAG	NA	ANCHOR_UNIQUE,CANONICAL,CIRCULAR,PERFECT_EXT,UNAMBIGUOUS_BP
1	28560632	28561398	5circ_001519	2	+	1	2	5	5	T01	2	0	1	1	GTAG	NA	ANCHOR_UNIQUE,CANONICAL,CIRCULAR,GOOD_EXT,UNAMBIGUOUS_BP
16	74632522	74637970	5circ_001520	3	-	1	3	40	40	T01	3	0	0	1	GTAG	NA	ANCHOR_UNIQUE,CANONICAL,CIRCULAR,PERFECT_EXT,UNAMBIGUOUS_BP
6	159784665	159788143	5circ_001521	8	-	4	3	5	5	T01	8	0	0	1	GTAG	NA	ANCHOR_UNIQUE,CANONICAL,CIRCULAR,PERFECT_EXT,UNAMBIGUOUS_BP
6	42612170	42617507	5circ_001522	6	+	3	6	40	40	T01	6	0	0	1	GTAG	NA	ANCHOR_UNIQUE,CANONICAL,CIRCULAR,PERFECT_EXT,UNAMBIGUOUS_BP
8	123337624	123339446	5circ_001524	5	-	5	5	40	40	T01	5	0	0	1	GTAG	NA	ANCHOR_UNIQUE,CANONICAL,CIRCULAR,PERFECT_EXT,UNAMBIGUOUS_BP
1	116504370	116521983	5circ_001526	3	-	1	3	5	35	T01	3	0	0	1	GTAG	NA	ANCHOR_UNIQUE,CANONICAL,CIRCULAR,PERFECT_EXT,UNAMBIGUOUS_BP
6	13579450	13600949	5circ_001527	4	+	4	4	5	40	T01	4	0	0	1	GTAG	NA	ANCHOR_UNIQUE,CANONICAL,CIRCULAR,PERFECT_EXT,UNAMBIGUOUS_BP
2	201398144	201407597	5circ_001528	4	-	1	4	5	40	T01	4	0	2	1	GTAG	NA	ANCHOR_UNIQUE,CANONICAL,CIRCULAR,OK_EXT,UNAMBIGUOUS_BP
10	73148275	73156655	5circ_001529	3	-	1	3	40	40	T01	3	0	0	1	GTAG	NA	ANCHOR_UNIQUE,CANONICAL,CIRCULAR,PERFECT_EXT,UNAMBIGUOUS_BP
4	143433490	143433716	5circ_001530	4	+	2	4	5	40	T01	4	0	0	1	GTAG	NA	ANCHOR_UNIQUE,CANONICAL,CIRCULAR,PERFECT_EXT,UNAMBIGUOUS_BP
3	9689963	9702064	5circ_001531	10	+	6	9	40	40	T01	10	0	0	1	GTAG	NA	ANCHOR_UNIQUE,CANONICAL,CIRCULAR,PERFECT_EXT,UNAMBIGUOUS_BP
15	85113872	85121014	5circ_001533	8	+	3	8	40	40	T01	8	0	0	1	GTAG	NA	ANCHOR_UNIQUE,CANONICAL,CIRCULAR,PERFECT_EXT,UNAMBIGUOUS_BP
17	8535386	8535931	5circ_001535	2	-	2	2	40	40	T01	2	0	0	1	GTAG	NA	ANCHOR_UNIQUE,CANONICAL,CIRCULAR,PERFECT_EXT,UNAMBIGUOUS_BP
16	57685169	57685739	5circ_001536	2	-	2	2	5	40	T01	2	0	0	1	GTAG	NA	ANCHOR_UNIQUE,CANONICAL,CIRCULAR,PERFECT_EXT,UNAMBIGUOUS_BP
17	39490556	39509761	5circ_001537	2	+	1	2	40	40	T01	2	0	0	1	GTAG	NA	ANCHOR_UNIQUE,CANONICAL,CIRCULAR,PERFECT_EXT,UNAMBIGUOUS_BP
11	120353092	120357538	5circ_001538	7	+	3	7	40	5	T01	7	0	0	1	GTAG	NA	ANCHOR_UNIQUE,CANONICAL,CIRCULAR,PERFECT_EXT,UNAMBIGUOUS_BP
1	171574926	171577637	5circ_001539	2	+	2	2	40	40	T01	2	0	0	1	GTAG	NA	ANCHOR_UNIQUE,CANONICAL,CIRCULAR,PERFECT_EXT,UNAMBIGUOUS_BP
17	49311311	49312845	5circ_001540	23	-	9	17	40	40	T01	23	0	0	1	GTAG	NA	ANCHOR_UNIQUE,CANONICAL,CIRCULAR,PERFECT_EXT,UNAMBIGUOUS_BP
2	183128286	183130545	5circ_001541	14	+	7	10	40	40	T01	14	0	0	1	GTAG	NA	ANCHOR_UNIQUE,CANONICAL,CIRCULAR,PERFECT_EXT,UNAMBIGUOUS_BP
4	152362471	152363455	5circ_001543	2	-	1	2	5	35	T01	2	2	0	1	GTAG	NA	ANCHOR_UNIQUE,CANONICAL,CIRCULAR,OK_EXT,UNAMBIGUOUS_BP
11	72707174	72714321	5circ_001544	2	-	1	2	5	40	T01	2	0	0	1	GTAG	NA	ANCHOR_UNIQUE,CANONICAL,CIRCULAR,PERFECT_EXT,UNAMBIGUOUS_BP
20	56386256	56388202	5circ_001545	15	-	6	14	5	40	T01	15	0	0	1	GTAG	NA	ANCHOR_UNIQUE,CANONICAL,CIRCULAR,PERFECT_EXT,UNAMBIGUOUS_BP
16	70261043	70262524	5circ_001546	25	-	11	25	40	40	T01	25	0	0	1	GTAG	NA	ANCHOR_UNIQUE,CANONICAL,CIRCULAR,PERFECT_EXT,UNAMBIGUOUS_BP
3	188341662	188406313	5circ_001547	3	+	1	3	35	40	T01	3	0	0	1	GTAG	NA	ANCHOR_UNIQUE,CANONICAL,CIRCULAR,PERFECT_EXT,UNAMBIGUOUS_BP
1	173802962	173803505	5circ_001548	8	-	3	8	5	40	T01	8	0	0	1	GTAG	NA	ANCHOR_UNIQUE,CANONICAL,CIRCULAR,PERFECT_EXT,UNAMBIGUOUS_BP
5	137795405	137814597	5circ_001550	4	-	1	4	5	40	T01	4	0	0	1	GTAG	NA	ANCHOR_UNIQUE,CANONICAL,CIRCULAR,PERFECT_EXT,UNAMBIGUOUS_BP
17	1636708	1637062	5circ_001551	78	-	26	76	40	40	T01	78	0	0	1	GTAG	NA	ANCHOR_UNIQUE,CANONICAL,CIRCULAR,PERFECT_EXT,UNAMBIGUOUS_BP
11	35204511	35211449	5circ_001552	5	+	1	5	35	5	T01	5	0	0	1	GTAG	NA	ANCHOR_UNIQUE,CANONICAL,CIRCULAR,PERFECT_EXT,UNAMBIGUOUS_BP
10	72343365	72345127	5circ_001553	6	-	3	6	40	5	T01	6	0	0	1	GTAG	NA	ANCHOR_UNIQUE,CANONICAL,CIRCULAR,PERFECT_EXT,UNAMBIGUOUS_BP
1	153663214	153665336	5circ_001556	3	-	1	3	5	40	T01	3	0	0	1	GTAG	NA	ANCHOR_UNIQUE,CANONICAL,CIRCULAR,PERFECT_EXT,UNAMBIGUOUS_BP
12	56431470	56434231	5circ_001559	4	-	4	4	40	40	T01	4	1	0	1	GTAG	NA	ANCHOR_UNIQUE,CANONICAL,CIRCULAR,GOOD_EXT,UNAMBIGUOUS_BP
1	225404625	225411440	5circ_001560	2	-	1	2	5	40	T01	2	0	0	1	GTAG	NA	ANCHOR_UNIQUE,CANONICAL,CIRCULAR,PERFECT_EXT,UNAMBIGUOUS_BP
11	3762901	3776021	5circ_001561	9	-	4	9	40	40	T01	9	0	0	1	GTAG	NA	ANCHOR_UNIQUE,CANONICAL,CIRCULAR,PERFECT_EXT,UNAMBIGUOUS_BP
3	129827802	129832826	5circ_001562	2	-	1	2	40	40	T01	2	1	0	1	GTAG	NA	ANCHOR_UNIQUE,CANONICAL,CIRCULAR,GOOD_EXT,UNAMBIGUOUS_BP
11	74057405	74085886	5circ_001563	4	-	4	4	40	5	T01	4	0	0	1	GTAG	NA	ANCHOR_UNIQUE,CANONICAL,CIRCULAR,PERFECT_EXT,UNAMBIGUOUS_BP
17	18206814	18208375	5circ_001564	5	+	2	5	40	40	T01	5	0	0	1	GTAG	NA	ANCHOR_UNIQUE,CANONICAL,CIRCULAR,PERFECT_EXT,UNAMBIGUOUS_BP
16	22225653	22225975	5circ_001566	14	+	2	14	40	40	T01	14	0	0	1	GTAG	NA	ANCHOR_UNIQUE,CANONICAL,CIRCULAR,PERFECT_EXT,UNAMBIGUOUS_BP
3	193657079	193667280	5circ_001567	9	+	4	9	40	40	T01	9	0	0	1	GTAG	NA	ANCHOR_UNIQUE,CANONICAL,CIRCULAR,PERFECT_EXT,UNAMBIGUOUS_BP
5	145587324	145671554	5circ_001568	4	-	1	4	40	40	T01	4	0	0	1	GTAG	NA	ANCHOR_UNIQUE,CANONICAL,CIRCULAR,PERFECT_EXT,UNAMBIGUOUS_BP
19	55341793	55346687	5circ_001569	8	+	2	8	5	40	T01	8	0	0	1	GTAG	NA	ANCHOR_UNIQUE,CANONICAL,CIRCULAR,PERFECT_EXT,UNAMBIGUOUS_BP
15	43203114	43209451	5circ_001570	2	-	1	2	5	40	T01	2	0	0	1	GTAG	NA	ANCHOR_UNIQUE,CANONICAL,CIRCULAR,PERFECT_EXT,UNAMBIGUOUS_BP
2	169538012	169544835	5circ_001571	17	-	11	14	40	40	T01	17	0	0	1	GTAG	NA	ANCHOR_UNIQUE,CANONICAL,CIRCULAR,PERFECT_EXT,UNAMBIGUOUS_BP
X	154785050	154792285	5circ_001572	2	-	1	2	40	5	T01	2	0	0	1	GTAG	NA	ANCHOR_UNIQUE,CANONICAL,CIRCULAR,PERFECT_EXT,UNAMBIGUOUS_BP
15	33983365	34003209	5circ_001573	5	-	2	5	5	35	T01	5	1	0	1	GTAG	NA	ANCHOR_UNIQUE,CANONICAL,CIRCULAR,GOOD_EXT,UNAMBIGUOUS_BP
15	50586391	50592626	5circ_001574	2	-	2	1	40	40	T01	2	0	0	1	GTAG	NA	ANCHOR_UNIQUE,CANONICAL,CIRCULAR,PERFECT_EXT,UNAMBIGUOUS_BP
19	44542760	44549176	5circ_001575	2	-	2	2	40	40	T01	2	0	0	1	GTAG	NA	ANCHOR_UNIQUE,CANONICAL,CIRCULAR,PERFECT_EXT,UNAMBIGUOUS_BP
10	95339132	95341678	5circ_001576	2	-	2	2	40	40	T01	2	0	0	1	GTAG	NA	ANCHOR_UNIQUE,CANONICAL,CIRCULAR,PERFECT_EXT,UNAMBIGUOUS_BP
21	46161382	46162067	5circ_001577	3	-	2	3	40	40	T01	3	0	0	1	GTAG	NA	ANCHOR_UNIQUE,CANONICAL,CIRCULAR,PERFECT_EXT,UNAMBIGUOUS_BP
11	130126699	130135715	5circ_001579	13	+	4	13	40	40	T01	13	0	0	1	GTAG	NA	ANCHOR_UNIQUE,CANONICAL,CIRCULAR,PERFECT_EXT,UNAMBIGUOUS_BP
22	46312140	46326654	5circ_001580	3	+	1	3	5	40	T01	3	0	0	1	GTAG	NA	ANCHOR_UNIQUE,CANONICAL,CIRCULAR,PERFECT_EXT,UNAMBIGUOUS_BP
9	130099456	130101223	5circ_001581	2	+	1	2	5	40	T01	2	0	0	1	GTAG	NA	ANCHOR_UNIQUE,CANONICAL,CIRCULAR,PERFECT_EXT,UNAMBIGUOUS_BP
17	61984170	61985090	5circ_001582	36	-	19	36	40	40	T01	36	0	0	1	GTAG	NA	ANCHOR_UNIQUE,CANONICAL,CIRCULAR,PERFECT_EXT,UNAMBIGUOUS_BP
17	5386137	5404246	5circ_001583	2	-	2	2	40	40	T01	2	0	0	1	GTAG	NA	ANCHOR_UNIQUE,CANONICAL,CIRCULAR,PERFECT_EXT,UNAMBIGUOUS_BP
1	171568246	171571421	5circ_001584	4	+	2	4	5	40	T01	4	0	0	1	GTAG	NA	ANCHOR_UNIQUE,CANONICAL,CIRCULAR,PERFECT_EXT,UNAMBIGUOUS_BP
3	30644746	30674246	5circ_001585	15	+	6	15	40	40	T01	15	0	0	1	GTAG	NA	ANCHOR_UNIQUE,CANONICAL,CIRCULAR,PERFECT_EXT,UNAMBIGUOUS_BP
13	28266714	28270866	5circ_001588	10	+	4	10	40	40	T01	10	0	0	1	GTAG	NA	ANCHOR_UNIQUE,CANONICAL,CIRCULAR,PERFECT_EXT,UNAMBIGUOUS_BP
10	87508335	87521169	5circ_001589	47	+	18	47	40	40	T01	47	0	0	1	GTAG	NA	ANCHOR_UNIQUE,CANONICAL,CIRCULAR,PERFECT_EXT,UNAMBIGUOUS_BP
21	31700994	31701918	5circ_001590	2	-	2	2	5	40	T01	2	0	0	1	GTAG	NA	ANCHOR_UNIQUE,CANONICAL,CIRCULAR,PERFECT_EXT,UNAMBIGUOUS_BP
3	170145422	170149244	5circ_001591	400	-	81	398	40	40	T01	400	0	0	1	GTAG	NA	ANCHOR_UNIQUE,CANONICAL,CIRCULAR,PERFECT_EXT,UNAMBIGUOUS_BP
12	19462509	19500221	5circ_001592	3	+	1	3	5	5	T01	3	0	0	1	GTAG	NA	ANCHOR_UNIQUE,CANONICAL,CIRCULAR,PERFECT_EXT,UNAMBIGUOUS_BP
18	76937155	76947652	5circ_001594	4	+	4	4	40	40	T01	4	0	0	1	GTAG	NA	ANCHOR_UNIQUE,CANONICAL,CIRCULAR,PERFECT_EXT,UNAMBIGUOUS_BP
8	123077110	123097441	5circ_001596	16	+	8	16	40	40	T01	16	0	0	1	GTAG	NA	ANCHOR_UNIQUE,CANONICAL,CIRCULAR,PERFECT_EXT,UNAMBIGUOUS_BP
18	47865058	47896809	5circ_001597	62	-	25	59	40	40	T01	62	0	0	1	GTAG	NA	ANCHOR_UNIQUE,CANONICAL,CIRCULAR,PERFECT_EXT,UNAMBIGUOUS_BP
15	51911039	51947301	5circ_001598	2	+	1	2	40	40	T01	2	0	0	1	GTAG	NA	ANCHOR_UNIQUE,CANONICAL,CIRCULAR,PERFECT_EXT,UNAMBIGUOUS_BP
9	86319086	86319583	5circ_001599	3	-	1	3	40	40	T01	3	1	0	1	GTAG	NA	ANCHOR_UNIQUE,CANONICAL,CIRCULAR,GOOD_EXT,UNAMBIGUOUS_BP
4	78850923	78861468	5circ_001600	2	+	2	2	40	5	T01	2	0	0	1	GTAG	NA	ANCHOR_UNIQUE,CANONICAL,CIRCULAR,PERFECT_EXT,UNAMBIGUOUS_BP
20	49084025	49089397	5circ_001604	6	+	1	6	40	40	T01	6	0	0	1	GTAG	NA	ANCHOR_UNIQUE,CANONICAL,CIRCULAR,PERFECT_EXT,UNAMBIGUOUS_BP
3	152414940	152447773	5circ_001605	4	+	2	4	40	40	T01	4	0	0	1	GTAG	NA	ANCHOR_UNIQUE,CANONICAL,CIRCULAR,PERFECT_EXT,UNAMBIGUOUS_BP
21	46643534	46644488	5circ_001606	17	+	8	17	40	40	T01	17	1	0	1	GTAG	NA	ANCHOR_UNIQUE,CANONICAL,CIRCULAR,GOOD_EXT,UNAMBIGUOUS_BP
22	17841821	17896981	5circ_001607	5	-	3	5	40	40	T01	5	0	0	1	GTAG	NA	ANCHOR_UNIQUE,CANONICAL,CIRCULAR,PERFECT_EXT,UNAMBIGUOUS_BP
6	136669282	136698682	5circ_001608	12	-	2	12	40	5	T01	12	0	0	1	GTAG	NA	ANCHOR_UNIQUE,CANONICAL,CIRCULAR,PERFECT_EXT,UNAMBIGUOUS_BP
19	50398850	50399484	5circ_001611	51	+	19	51	40	40	T01	51	0	0	1	GTAG	NA	ANCHOR_UNIQUE,CANONICAL,CIRCULAR,PERFECT_EXT,UNAMBIGUOUS_BP
19	54559007	54561378	5circ_001612	2	-	1	2	40	40	T01	2	0	0	1	GTAG	NA	ANCHOR_UNIQUE,CANONICAL,CIRCULAR,PERFECT_EXT,UNAMBIGUOUS_BP
1	168002481	168004793	5circ_001614	7	+	4	5	5	40	T01	7	0	0	1	GTAG	NA	ANCHOR_UNIQUE,CANONICAL,CIRCULAR,PERFECT_EXT,UNAMBIGUOUS_BP
9	128508875	128509097	5circ_001615	12	+	8	10	40	40	T01	12	0	0	1	GTAG	NA	ANCHOR_UNIQUE,CANONICAL,CIRCULAR,PERFECT_EXT,UNAMBIGUOUS_BP
16	30728965	30729572	5circ_001616	122	+	49	115	40	40	T01	122	0	0	1	GTAG	NA	ANCHOR_UNIQUE,CANONICAL,CIRCULAR,PERFECT_EXT,UNAMBIGUOUS_BP
17	80212070	80213885	5circ_001617	6	-	3	5	40	40	T01	6	1	0	1	GTAG	NA	ANCHOR_UNIQUE,CANONICAL,CIRCULAR,GOOD_EXT,UNAMBIGUOUS_BP
11	76513385	76516312	5circ_001619	2	+	2	2	40	40	T01	2	0	0	1	GTAG	NA	ANCHOR_UNIQUE,CANONICAL,CIRCULAR,PERFECT_EXT,UNAMBIGUOUS_BP
6	24830508	24835871	5circ_001620	2	-	1	2	5	40	T01	2	0	0	1	GTAG	NA	ANCHOR_UNIQUE,CANONICAL,CIRCULAR,PERFECT_EXT,UNAMBIGUOUS_BP
11	33709905	33722463	5circ_001621	4	-	1	4	40	5	T01	4	0	0	1	GTAG	NA	ANCHOR_UNIQUE,CANONICAL,CIRCULAR,PERFECT_EXT,UNAMBIGUOUS_BP
4	122249484	122255283	5circ_001622	3	+	1	3	40	40	T01	3	0	0	1	GTAG	NA	ANCHOR_UNIQUE,CANONICAL,CIRCULAR,PERFECT_EXT,UNAMBIGUOUS_BP
5	76597438	76611183	5circ_001624	5	+	1	5	40	40	T01	5	0	0	1	GTAG	NA	ANCHOR_UNIQUE,CANONICAL,CIRCULAR,PERFECT_EXT,UNAMBIGUOUS_BP
2	32777881	32787149	5circ_001625	3	+	3	2	40	5	T01	3	0	0	1	GTAG	NA	ANCHOR_UNIQUE,CANONICAL,CIRCULAR,PERFECT_EXT,UNAMBIGUOUS_BP
19	4844667	4847890	5circ_001626	6	-	1	6	40	35	T01	6	0	0	1	GTAG	NA	ANCHOR_UNIQUE,CANONICAL,CIRCULAR,PERFECT_EXT,UNAMBIGUOUS_BP
19	19336121	19347389	5circ_001627	2	+	1	2	5	40	T01	2	1	0	1	GTAG	NA	ANCHOR_UNIQUE,CANONICAL,CIRCULAR,GOOD_EXT,UNAMBIGUOUS_BP
8	38114191	38128951	5circ_001630	2	+	1	2	35	40	T01	2	0	0	1	GTAG	NA	ANCHOR_UNIQUE,CANONICAL,CIRCULAR,PERFECT_EXT,UNAMBIGUOUS_BP
22	45689711	45740538	5circ_001632	10	+	5	10	40	40	T01	10	0	0	1	GTAG	NA	ANCHOR_UNIQUE,CANONICAL,CIRCULAR,PERFECT_EXT,UNAMBIGUOUS_BP
4	53399729	53444103	5circ_001633	3	+	1	3	40	40	T01	3	0	0	1	GTAG	NA	ANCHOR_UNIQUE,CANONICAL,CIRCULAR,PERFECT_EXT,UNAMBIGUOUS_BP
12	112256319	112259265	5circ_001634	4	-	2	4	40	40	T01	4	0	0	1	GTAG	NA	ANCHOR_UNIQUE,CANONICAL,CIRCULAR,PERFECT_EXT,UNAMBIGUOUS_BP
6	53269332	53270211	5circ_001635	3	-	1	3	40	5	T01	3	1	0	1	GTAG	NA	ANCHOR_UNIQUE,CANONICAL,CIRCULAR,GOOD_EXT,UNAMBIGUOUS_BP
2	119945080	119952129	5circ_001636	6	+	2	6	5	5	T01	6	0	0	1	GTAG	NA	ANCHOR_UNIQUE,CANONICAL,CIRCULAR,PERFECT_EXT,UNAMBIGUOUS_BP
17	27303366	27310174	5circ_001637	4	+	2	4	40	40	T01	4	0	0	1	GTAG	NA	ANCHOR_UNIQUE,CANONICAL,CIRCULAR,PERFECT_EXT,UNAMBIGUOUS_BP
3	49335019	49335596	5circ_001638	3	-	1	3	40	5	T01	3	0	0	1	GTAG	NA	ANCHOR_UNIQUE,CANONICAL,CIRCULAR,PERFECT_EXT,UNAMBIGUOUS_BP
19	4446835	4454093	5circ_001640	2	-	1	2	40	40	T01	2	0	0	1	GTAG	NA	ANCHOR_UNIQUE,CANONICAL,CIRCULAR,PERFECT_EXT,UNAMBIGUOUS_BP
22	41147836	41149175	5circ_001642	2	+	1	2	5	5	T01	2	0	0	1	GTAG	NA	ANCHOR_UNIQUE,CANONICAL,CIRCULAR,PERFECT_EXT,UNAMBIGUOUS_BP
X	63665885	63678572	5circ_001643	8	-	3	8	40	40	T01	8	0	0	1	GTAG	NA	ANCHOR_UNIQUE,CANONICAL,CIRCULAR,PERFECT_EXT,UNAMBIGUOUS_BP
19	17733192	17734416	5circ_001644	2	+	1	2	5	40	T01	2	0	0	1	GTAG	NA	ANCHOR_UNIQUE,CANONICAL,CIRCULAR,PERFECT_EXT,UNAMBIGUOUS_BP
4	55890222	55896900	5circ_001645	5	+	5	5	40	40	T01	5	0	0	1	GTAG	NA	ANCHOR_UNIQUE,CANONICAL,CIRCULAR,PERFECT_EXT,UNAMBIGUOUS_BP
12	112243352	112248512	5circ_001646	4	-	1	4	40	5	T01	4	0	0	1	GTAG	NA	ANCHOR_UNIQUE,CANONICAL,CIRCULAR,PERFECT_EXT,UNAMBIGUOUS_BP
19	7267344	7267896	5circ_001647	7	-	2	7	5	35	T01	7	0	0	1	GTAG	NA	ANCHOR_UNIQUE,CANONICAL,CIRCULAR,PERFECT_EXT,UNAMBIGUOUS_BP
1	158634542	158640007	5circ_001648	2	-	1	2	5	40	T01	2	0	0	1	GTAG	NA	ANCHOR_UNIQUE,CANONICAL,CIRCULAR,PERFECT_EXT,UNAMBIGUOUS_BP
20	49264715	49271750	5circ_001649	15	-	7	15	40	40	T01	15	0	0	1	GTAG	NA	ANCHOR_UNIQUE,CANONICAL,CIRCULAR,PERFECT_EXT,UNAMBIGUOUS_BP
14	99257470	99257836	5circ_001650	28	-	16	28	40	40	T01	28	0	0	1	GTAG	NA	ANCHOR_UNIQUE,CANONICAL,CIRCULAR,PERFECT_EXT,UNAMBIGUOUS_BP
19	17839179	17840341	5circ_001651	3	-	2	3	40	40	T01	3	0	0	1	GTAG	NA	ANCHOR_UNIQUE,CANONICAL,CIRCULAR,PERFECT_EXT,UNAMBIGUOUS_BP
4	13336892	13381594	5circ_001652	3	-	1	3	5	40	T01	3	0	0	1	GTAG	NA	ANCHOR_UNIQUE,CANONICAL,CIRCULAR,PERFECT_EXT,UNAMBIGUOUS_BP
4	13336892	13425227	5circ_001653	6	-	2	6	40	5	T01	6	0	0	1	GTAG	NA	ANCHOR_UNIQUE,CANONICAL,CIRCULAR,PERFECT_EXT,UNAMBIGUOUS_BP
1	204432734	204433425	5circ_001654	2	-	1	2	5	40	T01	2	0	0	1	GTAG	NA	ANCHOR_UNIQUE,CANONICAL,CIRCULAR,PERFECT_EXT,UNAMBIGUOUS_BP
1	17092407	17095970	5circ_001655	2	-	1	2	5	40	T01	2	0	0	1	GTAG	NA	ANCHOR_UNIQUE,CANONICAL,CIRCULAR,PERFECT_EXT,UNAMBIGUOUS_BP
8	22108132	22108346	5circ_001657	3	-	1	3	40	40	T01	3	0	0	1	GTAG	NA	ANCHOR_UNIQUE,CANONICAL,CIRCULAR,PERFECT_EXT,UNAMBIGUOUS_BP
5	178222354	178222934	5circ_001658	6	-	2	6	40	35	T01	6	0	0	1	GTAG	NA	ANCHOR_UNIQUE,CANONICAL,CIRCULAR,PERFECT_EXT,UNAMBIGUOUS_BP
X	119406459	119426354	5circ_001661	2	+	2	2	40	40	T01	2	0	0	1	GTAG	NA	ANCHOR_UNIQUE,CANONICAL,CIRCULAR,PERFECT_EXT,UNAMBIGUOUS_BP
2	112216228	112233371	5circ_001662	2	-	1	2	40	5	T01	2	0	0	1	GTAG	NA	ANCHOR_UNIQUE,CANONICAL,CIRCULAR,PERFECT_EXT,UNAMBIGUOUS_BP
6	31863540	31869637	5circ_001663	8	-	2	8	40	5	T01	8	0	0	1	GTAG	NA	ANCHOR_UNIQUE,CANONICAL,CIRCULAR,PERFECT_EXT,UNAMBIGUOUS_BP
8	23573590	23574125	5circ_001664	5	-	3	5	40	40	T01	5	2	0	1	GTAG	NA	ANCHOR_UNIQUE,CANONICAL,CIRCULAR,OK_EXT,UNAMBIGUOUS_BP
X	66188358	66208246	5circ_001665	2	+	2	2	40	5	T01	2	0	0	1	GTAG	NA	ANCHOR_UNIQUE,CANONICAL,CIRCULAR,PERFECT_EXT,UNAMBIGUOUS_BP
2	26263379	26277160	5circ_001666	5	+	2	5	5	40	T01	5	0	0	1	GTAG	NA	ANCHOR_UNIQUE,CANONICAL,CIRCULAR,PERFECT_EXT,UNAMBIGUOUS_BP
19	40583397	40583717	5circ_001668	69	+	24	69	40	40	T01	69	0	0	1	GTAG	NA	ANCHOR_UNIQUE,CANONICAL,CIRCULAR,PERFECT_EXT,UNAMBIGUOUS_BP
17	44154552	44155411	5circ_001669	6	+	2	6	40	40	T01	6	0	0	1	GTAG	NA	ANCHOR_UNIQUE,CANONICAL,CIRCULAR,PERFECT_EXT,UNAMBIGUOUS_BP
19	583272	583482	5circ_001670	2	-	1	2	5	5	T01	2	2	0	1	GTAG	NA	ANCHOR_UNIQUE,CANONICAL,CIRCULAR,OK_EXT,UNAMBIGUOUS_BP
5	157359004	157361598	5circ_001671	7	+	4	7	40	40	T01	7	0	0	1	GTAG	NA	ANCHOR_UNIQUE,CANONICAL,CIRCULAR,PERFECT_EXT,UNAMBIGUOUS_BP
1	180863707	180880297	5circ_001672	2	+	1	2	40	40	T01	2	0	0	1	GTAG	NA	ANCHOR_UNIQUE,CANONICAL,CIRCULAR,PERFECT_EXT,UNAMBIGUOUS_BP
12	112229697	112233085	5circ_001673	21	-	11	21	40	40	T01	21	0	0	1	GTAG	NA	ANCHOR_UNIQUE,CANONICAL,CIRCULAR,PERFECT_EXT,UNAMBIGUOUS_BP
13	40559508	40645486	5circ_001675	3	-	1	3	5	35	T01	3	0	0	1	GTAG	NA	ANCHOR_UNIQUE,CANONICAL,CIRCULAR,PERFECT_EXT,UNAMBIGUOUS_BP
9	120518426	120539164	5circ_001676	8	-	5	8	5	40	T01	8	0	0	1	GTAG	NA	ANCHOR_UNIQUE,CANONICAL,CIRCULAR,PERFECT_EXT,UNAMBIGUOUS_BP
5	62449926	62451933	5circ_001677	2	+	1	2	5	40	T01	2	0	0	1	GTAG	NA	ANCHOR_UNIQUE,CANONICAL,CIRCULAR,PERFECT_EXT,UNAMBIGUOUS_BP
1	158654610	158662945	5circ_001679	2	-	1	2	40	5	T01	2	0	0	1	GTAG	NA	ANCHOR_UNIQUE,CANONICAL,CIRCULAR,PERFECT_EXT,UNAMBIGUOUS_BP
12	48924256	48924560	5circ_001680	4	-	2	4	40	40	T01	4	0	0	1	GTAG	NA	ANCHOR_UNIQUE,CANONICAL,CIRCULAR,PERFECT_EXT,UNAMBIGUOUS_BP
7	105073618	105078963	5circ_001682	2	+	1	2	5	35	T01	2	0	0	1	GTAG	NA	ANCHOR_UNIQUE,CANONICAL,CIRCULAR,PERFECT_EXT,UNAMBIGUOUS_BP
17	80891719	80893865	5circ_001683	6	+	4	6	40	40	T01	6	0	0	1	GTAG	NA	ANCHOR_UNIQUE,CANONICAL,CIRCULAR,PERFECT_EXT,UNAMBIGUOUS_BP
1	45495051	45495545	5circ_001685	13	-	4	13	40	40	T01	13	0	0	1	GTAG	NA	ANCHOR_UNIQUE,CANONICAL,CIRCULAR,PERFECT_EXT,UNAMBIGUOUS_BP
14	59370776	59371069	5circ_001688	2	+	2	2	5	40	T01	2	1	0	1	GTAG	NA	ANCHOR_UNIQUE,CANONICAL,CIRCULAR,GOOD_EXT,UNAMBIGUOUS_BP
17	45237280	45239065	5circ_001690	15	+	6	12	40	40	T01	15	0	0	1	GTAG	NA	ANCHOR_UNIQUE,CANONICAL,CIRCULAR,PERFECT_EXT,UNAMBIGUOUS_BP
2	99302689	99304745	5circ_001691	2	-	1	2	5	5	T01	2	1	0	1	GTAG	NA	ANCHOR_UNIQUE,CANONICAL,CIRCULAR,GOOD_EXT,UNAMBIGUOUS_BP
9	4833153	4860901	5circ_001692	5	+	1	5	40	40	T01	5	0	0	1	GTAG	NA	ANCHOR_UNIQUE,CANONICAL,CIRCULAR,PERFECT_EXT,UNAMBIGUOUS_BP
3	18415110	18420991	5circ_001693	6	-	2	6	5	40	T01	6	0	0	1	GTAG	NA	ANCHOR_UNIQUE,CANONICAL,CIRCULAR,PERFECT_EXT,UNAMBIGUOUS_BP
3	195708133	195708841	5circ_001694	2	+	2	2	40	37	T01	2	1	0	1	GTAG	NA	ANCHOR_UNIQUE,CANONICAL,CIRCULAR,GOOD_EXT,UNAMBIGUOUS_BP
2	15394226	15402301	5circ_001696	2	-	1	2	5	40	T01	2	0	0	1	GTAG	NA	ANCHOR_UNIQUE,CANONICAL,CIRCULAR,PERFECT_EXT,UNAMBIGUOUS_BP
19	8539946	8548317	5circ_001698	6	-	1	6	5	40	T01	6	0	0	1	GTAG	NA	ANCHOR_UNIQUE,CANONICAL,CIRCULAR,PERFECT_EXT,UNAMBIGUOUS_BP
3	40201941	40202135	5circ_001699	2	+	1	2	40	5	T01	2	1	0	1	GTAG	NA	ANCHOR_UNIQUE,CANONICAL,CIRCULAR,GOOD_EXT,UNAMBIGUOUS_BP
20	35583527	35583838	5circ_001700	4	+	1	4	40	40	T01	4	2	0	1	GTAG	NA	ANCHOR_UNIQUE,CANONICAL,CIRCULAR,OK_EXT,UNAMBIGUOUS_BP
5	115539664	115542901	5circ_001701	6	-	3	6	5	40	T01	6	0	0	1	GTAG	NA	ANCHOR_UNIQUE,CANONICAL,CIRCULAR,PERFECT_EXT,UNAMBIGUOUS_BP
15	63727646	63747858	5circ_001704	2	-	2	2	40	40	T01	2	0	0	1	GTAG	NA	ANCHOR_UNIQUE,CANONICAL,CIRCULAR,PERFECT_EXT,UNAMBIGUOUS_BP
3	196058283	196068130	5circ_001706	3	-	2	3	5	40	T01	3	0	0	1	GTAG	NA	ANCHOR_UNIQUE,CANONICAL,CIRCULAR,PERFECT_EXT,UNAMBIGUOUS_BP
16	53154446	53157541	5circ_001707	4	+	3	4	40	40	T01	4	0	0	1	GTAG	NA	ANCHOR_UNIQUE,CANONICAL,CIRCULAR,PERFECT_EXT,UNAMBIGUOUS_BP
19	19007346	19008428	5circ_001708	4	-	2	4	40	40	T01	4	0	0	1	GTAG	NA	ANCHOR_UNIQUE,CANONICAL,CIRCULAR,PERFECT_EXT,UNAMBIGUOUS_BP
3	41224020	41227352	5circ_001709	5	+	3	5	40	40	T01	5	0	0	1	GTAG	NA	ANCHOR_UNIQUE,CANONICAL,CIRCULAR,PERFECT_EXT,UNAMBIGUOUS_BP
6	131184372	131242184	5circ_001710	4	+	3	4	40	5	T01	4	1	0	1	GTAG	NA	ANCHOR_UNIQUE,CANONICAL,CIRCULAR,GOOD_EXT,UNAMBIGUOUS_BP
1	25446761	25458892	5circ_001713	5	+	3	5	40	40	T01	5	0	0	1	GTAG	NA	ANCHOR_UNIQUE,CANONICAL,CIRCULAR,PERFECT_EXT,UNAMBIGUOUS_BP
14	24116916	24117732	5circ_001714	2	+	1	2	40	40	T01	2	0	0	1	GTAG	NA	ANCHOR_UNIQUE,CANONICAL,CIRCULAR,PERFECT_EXT,UNAMBIGUOUS_BP
18	12691358	12695351	5circ_001715	4	-	2	4	40	40	T01	4	0	0	1	GTAG	NA	ANCHOR_UNIQUE,CANONICAL,CIRCULAR,PERFECT_EXT,UNAMBIGUOUS_BP
12	112228646	112235784	5circ_001716	2	-	2	2	40	40	T01	2	0	0	1	GTAG	NA	ANCHOR_UNIQUE,CANONICAL,CIRCULAR,PERFECT_EXT,UNAMBIGUOUS_BP
4	1238182	1241519	5circ_001717	5	-	2	5	5	40	T01	5	1	0	1	GTAG	NA	ANCHOR_UNIQUE,CANONICAL,CIRCULAR,GOOD_EXT,UNAMBIGUOUS_BP
21	39293810	39298582	5circ_001718	13	-	5	8	40	5	T01	13	0	0	1	GTAG	NA	ANCHOR_UNIQUE,CANONICAL,CIRCULAR,PERFECT_EXT,UNAMBIGUOUS_BP
1	224393827	224404570	5circ_001719	4	-	2	4	40	40	T01	4	0	0	1	GTAG	NA	ANCHOR_UNIQUE,CANONICAL,CIRCULAR,PERFECT_EXT,UNAMBIGUOUS_BP
2	190900563	190910321	5circ_001721	2	+	1	2	5	40	T01	2	0	0	1	GTAG	NA	ANCHOR_UNIQUE,CANONICAL,CIRCULAR,PERFECT_EXT,UNAMBIGUOUS_BP
2	151462241	151474072	5circ_001722	4	+	1	4	5	40	T01	4	0	0	1	GTAG	NA	ANCHOR_UNIQUE,CANONICAL,CIRCULAR,PERFECT_EXT,UNAMBIGUOUS_BP
17	50990449	50998617	5circ_001724	8	-	3	8	40	40	T01	8	0	0	1	GTAG	NA	ANCHOR_UNIQUE,CANONICAL,CIRCULAR,PERFECT_EXT,UNAMBIGUOUS_BP
10	60084601	60085253	5circ_001725	3	-	2	3	40	5	T01	3	0	0	1	GTAG	NA	ANCHOR_UNIQUE,CANONICAL,CIRCULAR,PERFECT_EXT,UNAMBIGUOUS_BP
6	4692695	4697141	5circ_001726	2	-	2	2	35	40	T01	2	0	0	1	GTAG	NA	ANCHOR_UNIQUE,CANONICAL,CIRCULAR,PERFECT_EXT,UNAMBIGUOUS_BP
11	108186481	108197420	5circ_001727	4	-	1	4	40	40	T01	4	0	0	1	GTAG	NA	ANCHOR_UNIQUE,CANONICAL,CIRCULAR,PERFECT_EXT,UNAMBIGUOUS_BP
8	102360070	102361626	5circ_001729	16	-	3	15	40	5	T01	16	0	0	1	GTAG	NA	ANCHOR_UNIQUE,CANONICAL,CIRCULAR,PERFECT_EXT,UNAMBIGUOUS_BP
2	202464816	202467689	5circ_001731	4	+	2	4	40	40	T01	4	0	0	1	GTAG	NA	ANCHOR_UNIQUE,CANONICAL,CIRCULAR,PERFECT_EXT,UNAMBIGUOUS_BP
1	155771066	155784089	5circ_001732	7	-	5	6	5	40	T01	7	0	0	1	GTAG	NA	ANCHOR_UNIQUE,CANONICAL,CIRCULAR,PERFECT_EXT,UNAMBIGUOUS_BP
4	39737419	39755739	5circ_001733	4	+	2	4	40	40	T01	4	0	0	1	GTAG	NA	ANCHOR_UNIQUE,CANONICAL,CIRCULAR,PERFECT_EXT,UNAMBIGUOUS_BP
1	180397515	180413471	5circ_001734	2	-	1	2	40	5	T01	2	0	0	1	GTAG	NA	ANCHOR_UNIQUE,CANONICAL,CIRCULAR,PERFECT_EXT,UNAMBIGUOUS_BP
11	46808030	46809874	5circ_001735	2	-	1	2	5	40	T01	2	0	0	1	GTAG	NA	ANCHOR_UNIQUE,CANONICAL,CIRCULAR,PERFECT_EXT,UNAMBIGUOUS_BP
1	42265114	42278672	5circ_001736	7	-	5	7	40	40	T01	7	0	0	1	GTAG	NA	ANCHOR_UNIQUE,CANONICAL,CIRCULAR,PERFECT_EXT,UNAMBIGUOUS_BP
X	41364273	41364730	5circ_001737	3	+	1	3	5	5	T01	3	0	0	1	GTAG	NA	ANCHOR_UNIQUE,CANONICAL,CIRCULAR,PERFECT_EXT,UNAMBIGUOUS_BP
2	24556014	24564430	5circ_001739	2	+	1	2	5	5	T01	2	0	2	1	GTAG	NA	ANCHOR_UNIQUE,CANONICAL,CIRCULAR,OK_EXT,UNAMBIGUOUS_BP
11	77672041	77693611	5circ_001740	2	-	1	2	5	40	T01	2	0	0	1	GTAG	NA	ANCHOR_UNIQUE,CANONICAL,CIRCULAR,PERFECT_EXT,UNAMBIGUOUS_BP
5	176943334	176951577	5circ_001742	8	-	3	8	40	40	T01	8	0	0	1	GTAG	NA	ANCHOR_UNIQUE,CANONICAL,CIRCULAR,PERFECT_EXT,UNAMBIGUOUS_BP
20	34585436	34603284	5circ_001743	7	-	3	7	5	40	T01	7	0	0	1	GTAG	NA	ANCHOR_UNIQUE,CANONICAL,CIRCULAR,PERFECT_EXT,UNAMBIGUOUS_BP
16	68801669	68810341	5circ_001744	14	+	6	14	40	40	T01	14	0	0	1	GTAG	NA	ANCHOR_UNIQUE,CANONICAL,CIRCULAR,PERFECT_EXT,UNAMBIGUOUS_BP
1	229539455	229556947	5circ_001745	29	-	10	29	5	40	T01	29	0	0	1	GTAG	NA	ANCHOR_UNIQUE,CANONICAL,CIRCULAR,PERFECT_EXT,UNAMBIGUOUS_BP
20	41533049	41551360	5circ_001746	8	-	3	7	5	5	T01	8	0	0	1	GTAG	NA	ANCHOR_UNIQUE,CANONICAL,CIRCULAR,PERFECT_EXT,UNAMBIGUOUS_BP
17	43196480	43197106	5circ_001747	3	+	1	3	40	5	T01	3	0	0	1	GTAG	NA	ANCHOR_UNIQUE,CANONICAL,CIRCULAR,PERFECT_EXT,UNAMBIGUOUS_BP
7	26725427	26739964	5circ_001748	2	-	2	2	40	5	T01	2	0	0	1	GTAG	NA	ANCHOR_UNIQUE,CANONICAL,CIRCULAR,PERFECT_EXT,UNAMBIGUOUS_BP
16	19669159	19682390	5circ_001749	3	+	1	3	35	40	T01	3	0	0	1	GTAG	NA	ANCHOR_UNIQUE,CANONICAL,CIRCULAR,PERFECT_EXT,UNAMBIGUOUS_BP
1	28987430	28997319	5circ_001751	3	+	2	3	40	40	T01	3	0	0	1	GTAG	NA	ANCHOR_UNIQUE,CANONICAL,CIRCULAR,PERFECT_EXT,UNAMBIGUOUS_BP
3	150562541	150568292	5circ_001752	13	+	4	13	40	40	T01	13	0	0	1	GTAG	NA	ANCHOR_UNIQUE,CANONICAL,CIRCULAR,PERFECT_EXT,UNAMBIGUOUS_BP
17	44147857	44149027	5circ_001753	6	+	2	6	40	40	T01	6	0	0	1	GTAG	NA	ANCHOR_UNIQUE,CANONICAL,CIRCULAR,PERFECT_EXT,UNAMBIGUOUS_BP
17	61995151	62063222	5circ_001754	2	-	2	2	40	40	T01	2	0	0	1	GTAG	NA	ANCHOR_UNIQUE,CANONICAL,CIRCULAR,PERFECT_EXT,UNAMBIGUOUS_BP
14	96555846	96556413	5circ_001756	14	+	9	13	40	40	T01	14	0	0	1	GTAG	NA	ANCHOR_UNIQUE,CANONICAL,CIRCULAR,PERFECT_EXT,UNAMBIGUOUS_BP
3	33411580	33425741	5circ_001757	3	-	2	3	40	40	T01	3	0	0	1	GTAG	NA	ANCHOR_UNIQUE,CANONICAL,CIRCULAR,PERFECT_EXT,UNAMBIGUOUS_BP
1	51394380	51447105	5circ_001758	4	-	2	4	40	35	T01	4	0	0	1	GTAG	NA	ANCHOR_UNIQUE,CANONICAL,CIRCULAR,PERFECT_EXT,UNAMBIGUOUS_BP
19	3730027	3730706	5circ_001759	3	+	1	3	40	5	T01	3	1	0	1	GTAG	NA	ANCHOR_UNIQUE,CANONICAL,CIRCULAR,GOOD_EXT,UNAMBIGUOUS_BP
2	28752037	28799433	5circ_001760	8	+	4	5	40	40	T01	8	0	0	1	GTAG	NA	ANCHOR_UNIQUE,CANONICAL,CIRCULAR,PERFECT_EXT,UNAMBIGUOUS_BP
1	179335505	179343635	5circ_001763	4	+	1	4	40	5	T01	4	1	0	1	GTAG	NA	ANCHOR_UNIQUE,CANONICAL,CIRCULAR,GOOD_EXT,UNAMBIGUOUS_BP
8	127890588	127890998	5circ_001764	19	+	7	19	40	40	T01	19	0	0	1	GTAG	NA	ANCHOR_UNIQUE,CANONICAL,CIRCULAR,PERFECT_EXT,UNAMBIGUOUS_BP
5	170041054	170055386	5circ_001765	2	+	1	2	40	40	T01	2	0	0	1	GTAG	NA	ANCHOR_UNIQUE,CANONICAL,CIRCULAR,PERFECT_EXT,UNAMBIGUOUS_BP
13	95161188	95178091	5circ_001766	11	-	6	11	40	40	T01	11	0	0	1	GTAG	NA	ANCHOR_UNIQUE,CANONICAL,CIRCULAR,PERFECT_EXT,UNAMBIGUOUS_BP
22	20726487	20742764	5circ_001767	4	-	1	4	35	35	T01	4	0	0	1	GTAG	NA	ANCHOR_UNIQUE,CANONICAL,CIRCULAR,PERFECT_EXT,UNAMBIGUOUS_BP
1	20969473	20981227	5circ_001768	6	-	3	6	40	40	T01	6	0	0	1	GTAG	NA	ANCHOR_UNIQUE,CANONICAL,CIRCULAR,PERFECT_EXT,UNAMBIGUOUS_BP
9	114355924	114358167	5circ_001769	7	-	3	7	40	40	T01	7	0	0	1	GTAG	NA	ANCHOR_UNIQUE,CANONICAL,CIRCULAR,PERFECT_EXT,UNAMBIGUOUS_BP
9	123070349	123076762	5circ_001770	4	+	1	4	40	5	T01	4	0	0	1	GTAG	NA	ANCHOR_UNIQUE,CANONICAL,CIRCULAR,PERFECT_EXT,UNAMBIGUOUS_BP
15	34862866	34870922	5circ_001771	2	-	1	2	5	40	T01	2	0	0	1	GTAG	NA	ANCHOR_UNIQUE,CANONICAL,CIRCULAR,PERFECT_EXT,UNAMBIGUOUS_BP
2	216039190	216058976	5circ_001772	4	-	2	4	40	35	T01	4	0	0	1	GTAG	NA	ANCHOR_UNIQUE,CANONICAL,CIRCULAR,PERFECT_EXT,UNAMBIGUOUS_BP
1	19682159	19683444	5circ_001773	6	-	3	6	40	40	T01	6	0	0	1	GTAG	NA	ANCHOR_UNIQUE,CANONICAL,CIRCULAR,PERFECT_EXT,UNAMBIGUOUS_BP
19	5047475	5050463	5circ_001774	2	+	1	2	40	35	T01	2	0	2	1	GTAG	NA	ANCHOR_UNIQUE,CANONICAL,CIRCULAR,OK_EXT,UNAMBIGUOUS_BP
10	4830674	4847660	5circ_001775	5	+	4	5	40	40	T01	5	0	0	1	GTAG	NA	ANCHOR_UNIQUE,CANONICAL,CIRCULAR,PERFECT_EXT,UNAMBIGUOUS_BP
9	100215400	100229827	5circ_001776	10	+	2	10	40	40	T01	10	0	0	1	GTAG	NA	ANCHOR_UNIQUE,CANONICAL,CIRCULAR,PERFECT_EXT,UNAMBIGUOUS_BP
6	144490070	144511123	5circ_001777	4	+	2	4	40	40	T01	4	0	0	1	GTAG	NA	ANCHOR_UNIQUE,CANONICAL,CIRCULAR,PERFECT_EXT,UNAMBIGUOUS_BP
20	17969800	17970130	5circ_001779	4	+	2	4	40	40	T01	4	0	0	1	GTAG	NA	ANCHOR_UNIQUE,CANONICAL,CIRCULAR,PERFECT_EXT,UNAMBIGUOUS_BP
5	157339056	157361598	5circ_001782	2	+	2	2	40	5	T01	2	0	0	1	GTAG	NA	ANCHOR_UNIQUE,CANONICAL,CIRCULAR,PERFECT_EXT,UNAMBIGUOUS_BP
19	38343579	38344368	5circ_001783	22	+	6	22	40	40	T01	22	0	0	1	GTAG	NA	ANCHOR_UNIQUE,CANONICAL,CIRCULAR,PERFECT_EXT,UNAMBIGUOUS_BP
19	48974212	48974733	5circ_001784	2	-	1	2	40	40	T01	2	0	0	1	GTAG	NA	ANCHOR_UNIQUE,CANONICAL,CIRCULAR,PERFECT_EXT,UNAMBIGUOUS_BP
10	48401611	48410168	5circ_001785	31	+	18	30	40	40	T01	31	0	0	1	GTAG	NA	ANCHOR_UNIQUE,CANONICAL,CIRCULAR,PERFECT_EXT,UNAMBIGUOUS_BP
X	153950242	153950998	5circ_001792	4	-	2	4	40	40	T01	4	0	0	1	GTAG	NA	ANCHOR_UNIQUE,CANONICAL,CIRCULAR,PERFECT_EXT,UNAMBIGUOUS_BP
6	98875414	98905670	5circ_001793	5	-	1	5	35	5	T01	5	0	2	1	GTAG	NA	ANCHOR_UNIQUE,CANONICAL,CIRCULAR,OK_EXT,UNAMBIGUOUS_BP
1	207677388	207717691	5circ_001795	9	+	6	4	40	40	T01	9	0	0	1	GTAG	NA	ANCHOR_UNIQUE,CANONICAL,CIRCULAR,PERFECT_EXT,UNAMBIGUOUS_BP
11	14771936	14789242	5circ_001796	13	+	5	12	40	40	T01	13	0	0	1	GTAG	NA	ANCHOR_UNIQUE,CANONICAL,CIRCULAR,PERFECT_EXT,UNAMBIGUOUS_BP
13	95115921	95166367	5circ_001797	4	-	3	3	5	5	T01	4	0	0	1	GTAG	NA	ANCHOR_UNIQUE,CANONICAL,CIRCULAR,PERFECT_EXT,UNAMBIGUOUS_BP
3	196053417	196072152	5circ_001798	3	-	2	3	5	40	T01	3	0	0	1	GTAG	NA	ANCHOR_UNIQUE,CANONICAL,CIRCULAR,PERFECT_EXT,UNAMBIGUOUS_BP
1	21247220	21258839	5circ_001799	13	-	5	13	40	40	T01	13	0	0	1	GTAG	NA	ANCHOR_UNIQUE,CANONICAL,CIRCULAR,PERFECT_EXT,UNAMBIGUOUS_BP
4	174283763	174310056	5circ_001800	5	+	2	5	40	40	T01	5	0	0	1	GTAG	NA	ANCHOR_UNIQUE,CANONICAL,CIRCULAR,PERFECT_EXT,UNAMBIGUOUS_BP
21	41237512	41257326	5circ_001802	2	+	2	2	40	40	T01	2	0	0	1	GTAG	NA	ANCHOR_UNIQUE,CANONICAL,CIRCULAR,PERFECT_EXT,UNAMBIGUOUS_BP
7	139596716	139620563	5circ_001803	2	-	2	2	40	40	T01	2	0	0	1	GTAG	NA	ANCHOR_UNIQUE,CANONICAL,CIRCULAR,PERFECT_EXT,UNAMBIGUOUS_BP
17	29684562	29703062	5circ_001804	4	-	2	4	40	40	T01	4	0	0	1	GTAG	NA	ANCHOR_UNIQUE,CANONICAL,CIRCULAR,PERFECT_EXT,UNAMBIGUOUS_BP
15	41375711	41377304	5circ_001805	17	+	6	17	40	40	T01	17	0	0	1	GTAG	NA	ANCHOR_UNIQUE,CANONICAL,CIRCULAR,PERFECT_EXT,UNAMBIGUOUS_BP
2	61068848	61070500	5circ_001806	2	+	1	2	5	40	T01	2	0	0	1	GTAG	NA	ANCHOR_UNIQUE,CANONICAL,CIRCULAR,PERFECT_EXT,UNAMBIGUOUS_BP
8	96662794	96662959	5circ_001807	2	-	1	2	5	5	T01	2	1	0	1	GTAG	NA	ANCHOR_UNIQUE,CANONICAL,CIRCULAR,GOOD_EXT,UNAMBIGUOUS_BP
22	21772872	21805945	5circ_001808	4	-	1	4	40	5	T01	4	0	0	1	GTAG	NA	ANCHOR_UNIQUE,CANONICAL,CIRCULAR,PERFECT_EXT,UNAMBIGUOUS_BP
5	134674614	134676125	5circ_001809	3	+	2	3	40	40	T01	3	0	0	1	GTAG	NA	ANCHOR_UNIQUE,CANONICAL,CIRCULAR,PERFECT_EXT,UNAMBIGUOUS_BP
7	17868406	17897446	5circ_001810	14	-	2	14	40	40	T01	14	0	0	1	GTAG	NA	ANCHOR_UNIQUE,CANONICAL,CIRCULAR,PERFECT_EXT,UNAMBIGUOUS_BP
11	34461250	34464235	5circ_001811	4	+	2	4	40	40	T01	4	0	0	1	GTAG	NA	ANCHOR_UNIQUE,CANONICAL,CIRCULAR,PERFECT_EXT,UNAMBIGUOUS_BP
6	167022408	167033971	5circ_001812	7	+	3	7	40	40	T01	7	0	0	1	GTAG	NA	ANCHOR_UNIQUE,CANONICAL,CIRCULAR,PERFECT_EXT,UNAMBIGUOUS_BP
10	124696157	124706887	5circ_001813	6	-	4	6	40	40	T01	6	0	0	1	GTAG	NA	ANCHOR_UNIQUE,CANONICAL,CIRCULAR,PERFECT_EXT,UNAMBIGUOUS_BP
1	1668326	1670151	5circ_001814	8	-	5	1	39	40	T01	8	0	0	1	GTAG	NA	ANCHOR_UNIQUE,CANONICAL,CIRCULAR,PERFECT_EXT,UNAMBIGUOUS_BP
10	95339132	95346452	5circ_001816	3	-	1	3	40	40	T01	3	0	0	1	GTAG	NA	ANCHOR_UNIQUE,CANONICAL,CIRCULAR,PERFECT_EXT,UNAMBIGUOUS_BP
10	124942456	124966781	5circ_001817	2	+	1	2	5	40	T01	2	0	2	1	GTAG	NA	ANCHOR_UNIQUE,CANONICAL,CIRCULAR,OK_EXT,UNAMBIGUOUS_BP
1	19232623	19233135	5circ_001818	2	-	2	2	5	40	T01	2	0	0	1	GTAG	NA	ANCHOR_UNIQUE,CANONICAL,CIRCULAR,PERFECT_EXT,UNAMBIGUOUS_BP
12	29307657	29317012	5circ_001819	3	+	1	3	40	40	T01	3	0	0	1	GTAG	NA	ANCHOR_UNIQUE,CANONICAL,CIRCULAR,PERFECT_EXT,UNAMBIGUOUS_BP
12	69258589	69262562	5circ_001822	3	+	2	3	40	5	T01	3	0	0	1	GTAG	NA	ANCHOR_UNIQUE,CANONICAL,CIRCULAR,PERFECT_EXT,UNAMBIGUOUS_BP
13	95166157	95207925	5circ_001823	4	-	2	4	40	40	T01	4	0	0	1	GTAG	NA	ANCHOR_UNIQUE,CANONICAL,CIRCULAR,PERFECT_EXT,UNAMBIGUOUS_BP
14	74672830	74676752	5circ_001824	7	-	3	7	40	40	T01	7	0	0	1	GTAG	NA	ANCHOR_UNIQUE,CANONICAL,CIRCULAR,PERFECT_EXT,UNAMBIGUOUS_BP
2	230759958	230793331	5circ_001825	4	+	2	4	40	40	T01	4	0	0	1	GTAG	NA	ANCHOR_UNIQUE,CANONICAL,CIRCULAR,PERFECT_EXT,UNAMBIGUOUS_BP
20	2896645	2897066	5circ_001826	2	-	2	2	40	5	T01	2	1	0	1	GTAG	NA	ANCHOR_UNIQUE,CANONICAL,CIRCULAR,GOOD_EXT,UNAMBIGUOUS_BP
8	70123883	70124865	5circ_001827	4	-	4	4	40	40	T01	4	0	0	1	GTAG	NA	ANCHOR_UNIQUE,CANONICAL,CIRCULAR,PERFECT_EXT,UNAMBIGUOUS_BP
10	26763879	26765318	5circ_001828	3	-	1	3	5	5	T01	3	0	0	1	GTAG	NA	ANCHOR_UNIQUE,CANONICAL,CIRCULAR,PERFECT_EXT,UNAMBIGUOUS_BP
12	115980749	116022601	5circ_001829	8	-	2	8	40	5	T01	8	0	0	1	GTAG	NA	ANCHOR_UNIQUE,CANONICAL,CIRCULAR,PERFECT_EXT,UNAMBIGUOUS_BP
7	5324213	5325248	5circ_001830	4	-	4	3	5	40	T01	4	0	0	1	GTAG	NA	ANCHOR_UNIQUE,CANONICAL,CIRCULAR,PERFECT_EXT,UNAMBIGUOUS_BP
8	26408021	26411620	5circ_001831	2	+	1	2	5	5	T01	2	1	0	1	GTAG	NA	ANCHOR_UNIQUE,CANONICAL,CIRCULAR,GOOD_EXT,UNAMBIGUOUS_BP
1	88740987	88744266	5circ_001832	2	+	1	2	5	40	T01	2	0	0	1	GTAG	NA	ANCHOR_UNIQUE,CANONICAL,CIRCULAR,PERFECT_EXT,UNAMBIGUOUS_BP
16	53141178	53157541	5circ_001834	4	+	2	4	5	40	T01	4	0	0	1	GTAG	NA	ANCHOR_UNIQUE,CANONICAL,CIRCULAR,PERFECT_EXT,UNAMBIGUOUS_BP
19	32642023	32643631	5circ_001835	2	-	1	2	5	40	T01	2	0	0	1	GTAG	NA	ANCHOR_UNIQUE,CANONICAL,CIRCULAR,PERFECT_EXT,UNAMBIGUOUS_BP
1	202154490	202155134	5circ_001837	8	-	4	8	40	40	T01	8	0	0	1	GTAG	NA	ANCHOR_UNIQUE,CANONICAL,CIRCULAR,PERFECT_EXT,UNAMBIGUOUS_BP
19	38119305	38119882	5circ_001840	14	+	2	14	40	40	T01	14	0	0	1	GTAG	NA	ANCHOR_UNIQUE,CANONICAL,CIRCULAR,PERFECT_EXT,UNAMBIGUOUS_BP
10	45625950	45640421	5circ_001841	2	-	2	2	40	40	T01	2	0	0	1	GTAG	NA	ANCHOR_UNIQUE,CANONICAL,CIRCULAR,PERFECT_EXT,UNAMBIGUOUS_BP
7	76432926	76433647	5circ_001842	4	+	3	4	5	40	T01	4	0	0	1	GTAG	NA	ANCHOR_UNIQUE,CANONICAL,CIRCULAR,PERFECT_EXT,UNAMBIGUOUS_BP
5	73051348	73087753	5circ_001843	4	+	3	4	5	40	T01	4	0	0	1	GTAG	NA	ANCHOR_UNIQUE,CANONICAL,CIRCULAR,PERFECT_EXT,UNAMBIGUOUS_BP
2	23819746	23823569	5circ_001844	98	-	33	96	40	40	T01	98	0	0	1	GTAG	NA	ANCHOR_UNIQUE,CANONICAL,CIRCULAR,PERFECT_EXT,UNAMBIGUOUS_BP
9	86033281	86079341	5circ_001845	3	-	1	3	40	40	T01	3	0	0	1	GTAG	NA	ANCHOR_UNIQUE,CANONICAL,CIRCULAR,PERFECT_EXT,UNAMBIGUOUS_BP
19	39828296	39831968	5circ_001846	4	-	1	4	40	40	T01	4	0	0	1	GTAG	NA	ANCHOR_UNIQUE,CANONICAL,CIRCULAR,PERFECT_EXT,UNAMBIGUOUS_BP
11	107806716	107811794	5circ_001847	3	-	1	3	40	40	T01	3	0	0	1	GTAG	NA	ANCHOR_UNIQUE,CANONICAL,CIRCULAR,PERFECT_EXT,UNAMBIGUOUS_BP
15	63693963	63716473	5circ_001849	4	-	1	4	40	40	T01	4	0	0	1	GTAG	NA	ANCHOR_UNIQUE,CANONICAL,CIRCULAR,PERFECT_EXT,UNAMBIGUOUS_BP
4	3253206	3253482	5circ_001850	3	+	3	3	40	40	T01	3	0	0	1	GTAG	NA	ANCHOR_UNIQUE,CANONICAL,CIRCULAR,PERFECT_EXT,UNAMBIGUOUS_BP
2	207555627	207570321	5circ_001851	8	+	3	8	40	40	T01	8	0	0	1	GTAG	NA	ANCHOR_UNIQUE,CANONICAL,CIRCULAR,PERFECT_EXT,UNAMBIGUOUS_BP
2	45546731	45562756	5circ_001853	17	-	10	17	40	40	T01	17	0	0	1	GTAG	NA	ANCHOR_UNIQUE,CANONICAL,CIRCULAR,PERFECT_EXT,UNAMBIGUOUS_BP
8	116655855	116658980	5circ_001855	24	-	14	24	40	40	T01	24	0	0	1	GTAG	NA	ANCHOR_UNIQUE,CANONICAL,CIRCULAR,PERFECT_EXT,UNAMBIGUOUS_BP
17	32755491	32780784	5circ_001856	10	-	2	10	40	40	T01	10	0	0	1	GTAG	NA	ANCHOR_UNIQUE,CANONICAL,CIRCULAR,PERFECT_EXT,UNAMBIGUOUS_BP
3	196073929	196075360	5circ_001857	38	-	18	37	40	40	T01	38	0	0	1	GTAG	NA	ANCHOR_UNIQUE,CANONICAL,CIRCULAR,PERFECT_EXT,UNAMBIGUOUS_BP
14	45096423	45096758	5circ_001859	2	+	1	2	40	40	T01	2	0	0	1	GTAG	NA	ANCHOR_UNIQUE,CANONICAL,CIRCULAR,PERFECT_EXT,UNAMBIGUOUS_BP
X	124068563	124081528	5circ_001860	2	+	1	2	40	40	T01	2	0	0	1	GTAG	NA	ANCHOR_UNIQUE,CANONICAL,CIRCULAR,PERFECT_EXT,UNAMBIGUOUS_BP
11	70354300	70372574	5circ_001861	2	+	1	2	40	5	T01	2	0	0	1	GTAG	NA	ANCHOR_UNIQUE,CANONICAL,CIRCULAR,PERFECT_EXT,UNAMBIGUOUS_BP
15	90217438	90221765	5circ_001862	94	+	42	90	40	40	T01	94	0	0	1	GTAG	NA	ANCHOR_UNIQUE,CANONICAL,CIRCULAR,PERFECT_EXT,UNAMBIGUOUS_BP
8	22498000	22522749	5circ_001864	4	+	1	4	5	40	T01	4	0	0	1	GTAG	NA	ANCHOR_UNIQUE,CANONICAL,CIRCULAR,PERFECT_EXT,UNAMBIGUOUS_BP
2	229858771	229880128	5circ_001865	17	-	9	17	40	40	T01	17	0	0	1	GTAG	NA	ANCHOR_UNIQUE,CANONICAL,CIRCULAR,PERFECT_EXT,UNAMBIGUOUS_BP
9	137798812	137800984	5circ_001866	2	+	1	2	40	40	T01	2	0	0	1	GTAG	NA	ANCHOR_UNIQUE,CANONICAL,CIRCULAR,PERFECT_EXT,UNAMBIGUOUS_BP
1	158678400	158681667	5circ_001868	2	-	2	2	40	40	T01	2	0	0	1	GTAG	NA	ANCHOR_UNIQUE,CANONICAL,CIRCULAR,PERFECT_EXT,UNAMBIGUOUS_BP
12	66145840	66153448	5circ_001869	9	-	5	9	40	40	T01	9	0	0	1	GTAG	NA	ANCHOR_UNIQUE,CANONICAL,CIRCULAR,PERFECT_EXT,UNAMBIGUOUS_BP
20	37066723	37068186	5circ_001870	14	-	4	13	40	40	T01	14	0	0	1	GTAG	NA	ANCHOR_UNIQUE,CANONICAL,CIRCULAR,PERFECT_EXT,UNAMBIGUOUS_BP
X	136012957	136016758	5circ_001871	2	+	2	2	40	5	T01	2	0	0	1	GTAG	NA	ANCHOR_UNIQUE,CANONICAL,CIRCULAR,PERFECT_EXT,UNAMBIGUOUS_BP
7	158759485	158764853	5circ_001872	109	-	35	108	40	40	T01	109	0	0	1	GTAG	NA	ANCHOR_UNIQUE,CANONICAL,CIRCULAR,PERFECT_EXT,UNAMBIGUOUS_BP
7	105542407	105551707	5circ_001873	4	+	1	4	5	40	T01	4	0	0	1	GTAG	NA	ANCHOR_UNIQUE,CANONICAL,CIRCULAR,PERFECT_EXT,UNAMBIGUOUS_BP
7	105062163	105064116	5circ_001876	3	+	2	3	40	40	T01	3	0	0	1	GTAG	NA	ANCHOR_UNIQUE,CANONICAL,CIRCULAR,PERFECT_EXT,UNAMBIGUOUS_BP
21	43018132	43028874	5circ_001878	6	+	2	6	40	40	T01	6	0	0	1	GTAG	NA	ANCHOR_UNIQUE,CANONICAL,CIRCULAR,PERFECT_EXT,UNAMBIGUOUS_BP
1	47280945	47299968	5circ_001879	11	-	1	11	40	5	T01	11	0	0	1	GTAG	NA	ANCHOR_UNIQUE,CANONICAL,CIRCULAR,PERFECT_EXT,UNAMBIGUOUS_BP
11	32953856	32958086	5circ_001881	2	+	1	2	40	5	T01	2	0	0	1	GTAG	NA	ANCHOR_UNIQUE,CANONICAL,CIRCULAR,PERFECT_EXT,UNAMBIGUOUS_BP
17	83035034	83048785	5circ_001882	2	-	1	2	40	5	T01	2	0	0	1	GTAG	NA	ANCHOR_UNIQUE,CANONICAL,CIRCULAR,PERFECT_EXT,UNAMBIGUOUS_BP
5	157241645	157244478	5circ_001883	11	+	4	11	40	40	T01	11	0	0	1	GTAG	NA	ANCHOR_UNIQUE,CANONICAL,CIRCULAR,PERFECT_EXT,UNAMBIGUOUS_BP
6	45491940	45512407	5circ_001887	5	+	3	5	40	40	T01	5	0	0	1	GTAG	NA	ANCHOR_UNIQUE,CANONICAL,CIRCULAR,PERFECT_EXT,UNAMBIGUOUS_BP
16	29799627	29800048	5circ_001888	3	+	1	3	40	40	T01	3	1	0	1	GTAG	NA	ANCHOR_UNIQUE,CANONICAL,CIRCULAR,GOOD_EXT,UNAMBIGUOUS_BP
4	39737419	39774933	5circ_001889	2	+	1	2	5	40	T01	2	0	0	1	GTAG	NA	ANCHOR_UNIQUE,CANONICAL,CIRCULAR,PERFECT_EXT,UNAMBIGUOUS_BP
19	16392303	16395467	5circ_001890	2	-	2	2	40	40	T01	2	0	0	1	GTAG	NA	ANCHOR_UNIQUE,CANONICAL,CIRCULAR,PERFECT_EXT,UNAMBIGUOUS_BP
21	33765874	33767828	5circ_001891	4	+	2	3	40	40	T01	4	0	0	1	GTAG	NA	ANCHOR_UNIQUE,CANONICAL,CIRCULAR,PERFECT_EXT,UNAMBIGUOUS_BP
18	79077981	79126375	5circ_001892	4	+	2	4	40	40	T01	4	0	0	1	GTAG	NA	ANCHOR_UNIQUE,CANONICAL,CIRCULAR,PERFECT_EXT,UNAMBIGUOUS_BP
14	102041734	102042012	5circ_001893	4	+	2	4	40	5	T01	4	0	0	1	GTAG	NA	ANCHOR_UNIQUE,CANONICAL,CIRCULAR,PERFECT_EXT,UNAMBIGUOUS_BP
17	37440504	37458587	5circ_001895	2	+	1	2	40	5	T01	2	0	0	1	GTAG	NA	ANCHOR_UNIQUE,CANONICAL,CIRCULAR,PERFECT_EXT,UNAMBIGUOUS_BP
8	99502835	99511512	5circ_001896	5	+	4	5	40	40	T01	5	0	0	1	GTAG	NA	ANCHOR_UNIQUE,CANONICAL,CIRCULAR,PERFECT_EXT,UNAMBIGUOUS_BP
12	111658735	111679340	5circ_001898	6	-	5	6	40	40	T01	6	0	0	1	GTAG	NA	ANCHOR_UNIQUE,CANONICAL,CIRCULAR,PERFECT_EXT,UNAMBIGUOUS_BP
2	98592570	98593256	5circ_001899	2	-	1	2	40	40	T01	2	1	0	1	GTAG	NA	ANCHOR_UNIQUE,CANONICAL,CIRCULAR,GOOD_EXT,UNAMBIGUOUS_BP
10	133288839	133289969	5circ_001900	2	-	1	2	40	5	T01	2	0	0	1	GTAG	NA	ANCHOR_UNIQUE,CANONICAL,CIRCULAR,PERFECT_EXT,UNAMBIGUOUS_BP
4	82874610	82881940	5circ_001903	2	-	1	2	5	40	T01	2	0	0	1	GTAG	NA	ANCHOR_UNIQUE,CANONICAL,CIRCULAR,PERFECT_EXT,UNAMBIGUOUS_BP
13	27581296	27581803	5circ_001904	28	-	11	28	40	40	T01	28	0	0	1	GTAG	NA	ANCHOR_UNIQUE,CANONICAL,CIRCULAR,PERFECT_EXT,UNAMBIGUOUS_BP
3	33684358	33696933	5circ_001907	3	-	1	3	5	5	T01	3	0	0	1	GTAG	NA	ANCHOR_UNIQUE,CANONICAL,CIRCULAR,PERFECT_EXT,UNAMBIGUOUS_BP
3	43303097	43309942	5circ_001908	2	+	2	2	40	40	T01	2	0	0	1	GTAG	NA	ANCHOR_UNIQUE,CANONICAL,CIRCULAR,PERFECT_EXT,UNAMBIGUOUS_BP
10	5767939	5768384	5circ_001910	2	-	1	2	40	5	T01	2	0	0	1	GTAG	NA	ANCHOR_UNIQUE,CANONICAL,CIRCULAR,PERFECT_EXT,UNAMBIGUOUS_BP
1	65364634	65406133	5circ_001911	2	+	2	1	40	40	T01	2	0	0	1	GTAG	NA	ANCHOR_UNIQUE,CANONICAL,CIRCULAR,PERFECT_EXT,UNAMBIGUOUS_BP
1	52667398	52668759	5circ_001912	2	+	2	2	40	40	T01	2	0	0	1	GTAG	NA	ANCHOR_UNIQUE,CANONICAL,CIRCULAR,PERFECT_EXT,UNAMBIGUOUS_BP
5	77046346	77048272	5circ_001913	8	+	6	8	40	40	T01	8	0	0	1	GTAG	NA	ANCHOR_UNIQUE,CANONICAL,CIRCULAR,PERFECT_EXT,UNAMBIGUOUS_BP
10	103111744	103174982	5circ_001914	9	-	1	9	40	40	T01	9	0	0	1	GTAG	NA	ANCHOR_UNIQUE,CANONICAL,CIRCULAR,PERFECT_EXT,UNAMBIGUOUS_BP
1	59339957	59378837	5circ_001915	12	+	7	12	40	40	T01	12	0	0	1	GTAG	NA	ANCHOR_UNIQUE,CANONICAL,CIRCULAR,PERFECT_EXT,UNAMBIGUOUS_BP
13	24450729	24451623	5circ_001916	2	-	1	2	5	5	T01	2	1	0	1	GTAG	NA	ANCHOR_UNIQUE,CANONICAL,CIRCULAR,GOOD_EXT,UNAMBIGUOUS_BP
19	8553138	8554743	5circ_001917	2	-	2	2	40	40	T01	2	0	0	1	GTAG	NA	ANCHOR_UNIQUE,CANONICAL,CIRCULAR,PERFECT_EXT,UNAMBIGUOUS_BP
14	58488620	58512627	5circ_001918	8	+	3	6	40	40	T01	8	0	0	1	GTAG	NA	ANCHOR_UNIQUE,CANONICAL,CIRCULAR,PERFECT_EXT,UNAMBIGUOUS_BP
17	32365329	32368014	5circ_001919	6	+	3	4	40	5	T01	6	0	0	1	GTAG	NA	ANCHOR_UNIQUE,CANONICAL,CIRCULAR,PERFECT_EXT,UNAMBIGUOUS_BP
2	8770669	8776892	5circ_001920	48	-	24	48	40	40	T01	48	0	0	1	GTAG	NA	ANCHOR_UNIQUE,CANONICAL,CIRCULAR,PERFECT_EXT,UNAMBIGUOUS_BP
11	16014941	16101330	5circ_001923	17	-	9	16	40	40	T01	17	0	0	1	GTAG	NA	ANCHOR_UNIQUE,CANONICAL,CIRCULAR,PERFECT_EXT,UNAMBIGUOUS_BP
4	20712787	20727397	5circ_001925	2	+	1	2	5	5	T01	2	0	0	1	GTAG	NA	ANCHOR_UNIQUE,CANONICAL,CIRCULAR,PERFECT_EXT,UNAMBIGUOUS_BP
15	72760406	72775097	5circ_001927	4	-	2	4	40	40	T01	4	0	0	1	GTAG	NA	ANCHOR_UNIQUE,CANONICAL,CIRCULAR,PERFECT_EXT,UNAMBIGUOUS_BP
2	85368685	85377474	5circ_001928	2	+	1	2	5	5	T01	2	0	0	1	GTAG	NA	ANCHOR_UNIQUE,CANONICAL,CIRCULAR,PERFECT_EXT,UNAMBIGUOUS_BP
10	92531747	92537550	5circ_001934	2	-	2	2	5	40	T01	2	0	0	1	GTAG	NA	ANCHOR_UNIQUE,CANONICAL,CIRCULAR,PERFECT_EXT,UNAMBIGUOUS_BP
14	103498501	103500200	5circ_001936	3	+	2	3	35	40	T01	3	0	0	1	GTAG	NA	ANCHOR_UNIQUE,CANONICAL,CIRCULAR,PERFECT_EXT,UNAMBIGUOUS_BP
2	64567561	64573068	5circ_001940	6	+	3	6	40	40	T01	6	0	0	1	GTAG	NA	ANCHOR_UNIQUE,CANONICAL,CIRCULAR,PERFECT_EXT,UNAMBIGUOUS_BP
10	124942456	124974398	5circ_001942	2	+	1	2	40	40	T01	2	0	0	1	GTAG	NA	ANCHOR_UNIQUE,CANONICAL,CIRCULAR,PERFECT_EXT,UNAMBIGUOUS_BP
X	132384662	132392334	5circ_001943	2	-	1	2	40	40	T01	2	0	0	1	GTAG	NA	ANCHOR_UNIQUE,CANONICAL,CIRCULAR,PERFECT_EXT,UNAMBIGUOUS_BP
1	151024610	151025673	5circ_001944	30	+	14	27	40	40	T01	30	0	0	1	GTAG	NA	ANCHOR_UNIQUE,CANONICAL,CIRCULAR,PERFECT_EXT,UNAMBIGUOUS_BP
X	53640590	53645463	5circ_001946	2	-	1	2	5	40	T01	2	0	0	1	GTAG	NA	ANCHOR_UNIQUE,CANONICAL,CIRCULAR,PERFECT_EXT,UNAMBIGUOUS_BP
11	5225512	5227069	5circ_001948	3	+	2	3	5	5	T01	3	1	0	1	GTAG	NA	ANCHOR_UNIQUE,CANONICAL,CIRCULAR,GOOD_EXT,UNAMBIGUOUS_BP
2	73950584	73957240	5circ_001949	2	+	1	2	5	40	T01	2	0	0	1	GTAG	NA	ANCHOR_UNIQUE,CANONICAL,CIRCULAR,PERFECT_EXT,UNAMBIGUOUS_BP
15	65752378	65761438	5circ_001950	35	-	19	35	40	40	T01	35	0	0	1	GTAG	NA	ANCHOR_UNIQUE,CANONICAL,CIRCULAR,PERFECT_EXT,UNAMBIGUOUS_BP
3	51541497	51552063	5circ_001951	32	+	14	22	40	5	T01	32	0	0	1	GTAG	NA	ANCHOR_UNIQUE,CANONICAL,CIRCULAR,PERFECT_EXT,UNAMBIGUOUS_BP
17	60265975	60345608	5circ_001952	4	-	1	4	5	5	T01	4	0	0	1	GTAG	NA	ANCHOR_UNIQUE,CANONICAL,CIRCULAR,PERFECT_EXT,UNAMBIGUOUS_BP
9	83659779	83686155	5circ_001953	2	-	2	2	5	40	T01	2	0	0	1	GTAG	NA	ANCHOR_UNIQUE,CANONICAL,CIRCULAR,PERFECT_EXT,UNAMBIGUOUS_BP
16	48347506	48348290	5circ_001954	27	+	11	27	40	40	T01	27	0	0	1	GTAG	NA	ANCHOR_UNIQUE,CANONICAL,CIRCULAR,PERFECT_EXT,UNAMBIGUOUS_BP
16	8920358	8930397	5circ_001956	6	-	4	3	5	40	T01	6	0	0	1	GTAG	NA	ANCHOR_UNIQUE,CANONICAL,CIRCULAR,PERFECT_EXT,UNAMBIGUOUS_BP
5	177044388	177050936	5circ_001957	2	+	1	2	40	40	T01	2	0	0	1	GTAG	NA	ANCHOR_UNIQUE,CANONICAL,CIRCULAR,PERFECT_EXT,UNAMBIGUOUS_BP
13	95177706	95186892	5circ_001958	3	-	1	3	40	35	T01	3	0	0	1	GTAG	NA	ANCHOR_UNIQUE,CANONICAL,CIRCULAR,PERFECT_EXT,UNAMBIGUOUS_BP
2	70179531	70181997	5circ_001960	7	-	3	7	40	40	T01	7	0	0	1	GTAG	NA	ANCHOR_UNIQUE,CANONICAL,CIRCULAR,PERFECT_EXT,UNAMBIGUOUS_BP
5	109729341	109789527	5circ_001961	2	+	2	1	40	4	T01	2	0	0	1	GTAG	NA	ANCHOR_UNIQUE,CANONICAL,CIRCULAR,PERFECT_EXT,UNAMBIGUOUS_BP
19	17516172	17517850	5circ_001962	5	+	1	5	5	40	T01	5	0	0	1	GTAG	NA	ANCHOR_UNIQUE,CANONICAL,CIRCULAR,PERFECT_EXT,UNAMBIGUOUS_BP
13	95161188	95166367	5circ_001963	27	-	11	25	40	40	T01	27	0	0	1	GTAG	NA	ANCHOR_UNIQUE,CANONICAL,CIRCULAR,PERFECT_EXT,UNAMBIGUOUS_BP
17	9490662	9490818	5circ_001964	3	-	2	3	5	5	T01	3	0	0	1	GTAG	NA	ANCHOR_UNIQUE,CANONICAL,CIRCULAR,PERFECT_EXT,UNAMBIGUOUS_BP
2	24739431	24742186	5circ_001965	6	+	3	6	40	40	T01	6	0	0	1	GTAG	NA	ANCHOR_UNIQUE,CANONICAL,CIRCULAR,PERFECT_EXT,UNAMBIGUOUS_BP
10	11594987	11601467	5circ_001967	4	-	2	4	40	40	T01	4	0	0	1	GTAG	NA	ANCHOR_UNIQUE,CANONICAL,CIRCULAR,PERFECT_EXT,UNAMBIGUOUS_BP
3	15571667	15580045	5circ_001968	3	-	1	3	5	40	T01	3	0	0	1	GTAG	NA	ANCHOR_UNIQUE,CANONICAL,CIRCULAR,PERFECT_EXT,UNAMBIGUOUS_BP
15	80098415	80122800	5circ_001969	37	+	17	21	40	40	T01	37	0	0	1	GTAG	NA	ANCHOR_UNIQUE,CANONICAL,CIRCULAR,PERFECT_EXT,UNAMBIGUOUS_BP
15	41085368	41087682	5circ_001971	22	-	5	22	40	40	T01	22	0	0	1	GTAG	NA	ANCHOR_UNIQUE,CANONICAL,CIRCULAR,PERFECT_EXT,UNAMBIGUOUS_BP
6	63646526	63680161	5circ_001972	5	+	4	5	5	40	T01	5	0	0	1	GTAG	NA	ANCHOR_UNIQUE,CANONICAL,CIRCULAR,PERFECT_EXT,UNAMBIGUOUS_BP
17	59737452	59765138	5circ_001974	2	+	1	2	5	5	T01	2	0	0	1	GTAG	NA	ANCHOR_UNIQUE,CANONICAL,CIRCULAR,PERFECT_EXT,UNAMBIGUOUS_BP
11	68583042	68596218	5circ_001975	3	+	1	3	5	5	T01	3	0	0	1	GTAG	NA	ANCHOR_UNIQUE,CANONICAL,CIRCULAR,PERFECT_EXT,UNAMBIGUOUS_BP
3	43299753	43303792	5circ_001977	3	+	1	3	35	5	T01	3	0	0	1	GTAG	NA	ANCHOR_UNIQUE,CANONICAL,CIRCULAR,PERFECT_EXT,UNAMBIGUOUS_BP
20	47224316	47239138	5circ_001979	4	-	2	4	40	40	T01	4	0	0	1	GTAG	NA	ANCHOR_UNIQUE,CANONICAL,CIRCULAR,PERFECT_EXT,UNAMBIGUOUS_BP
3	129838897	129880559	5circ_001980	2	-	1	2	40	40	T01	2	0	0	1	GTAG	NA	ANCHOR_UNIQUE,CANONICAL,CIRCULAR,PERFECT_EXT,UNAMBIGUOUS_BP
17	49611279	49619385	5circ_001981	3	-	1	3	40	40	T01	3	0	0	1	GTAG	NA	ANCHOR_UNIQUE,CANONICAL,CIRCULAR,PERFECT_EXT,UNAMBIGUOUS_BP
4	1900625	1904378	5circ_001982	32	+	7	32	40	40	T01	32	0	0	1	GTAG	NA	ANCHOR_UNIQUE,CANONICAL,CIRCULAR,PERFECT_EXT,UNAMBIGUOUS_BP
6	15452005	15487542	5circ_001984	5	+	1	5	40	40	T01	5	0	0	1	GTAG	NA	ANCHOR_UNIQUE,CANONICAL,CIRCULAR,PERFECT_EXT,UNAMBIGUOUS_BP
20	61997549	61999108	5circ_001985	3	-	2	3	40	40	T01	3	0	0	1	GTAG	NA	ANCHOR_UNIQUE,CANONICAL,CIRCULAR,PERFECT_EXT,UNAMBIGUOUS_BP
17	29517452	29522519	5circ_001986	2	+	1	2	40	40	T01	2	0	0	1	GTAG	NA	ANCHOR_UNIQUE,CANONICAL,CIRCULAR,PERFECT_EXT,UNAMBIGUOUS_BP
1	15630324	15651895	5circ_001987	24	+	14	24	40	40	T01	24	0	0	1	GTAG	NA	ANCHOR_UNIQUE,CANONICAL,CIRCULAR,PERFECT_EXT,UNAMBIGUOUS_BP
15	50300788	50314670	5circ_001988	3	-	2	3	5	40	T01	3	0	0	1	GTAG	NA	ANCHOR_UNIQUE,CANONICAL,CIRCULAR,PERFECT_EXT,UNAMBIGUOUS_BP
X	118584734	118590302	5circ_001989	4	+	3	2	36	40	T01	4	0	0	1	GTAG	NA	ANCHOR_UNIQUE,CANONICAL,CIRCULAR,PERFECT_EXT,UNAMBIGUOUS_BP
4	911672	913668	5circ_001991	4	-	2	4	40	40	T01	4	1	0	1	GTAG	NA	ANCHOR_UNIQUE,CANONICAL,CIRCULAR,GOOD_EXT,UNAMBIGUOUS_BP
2	10419733	10420135	5circ_001993	49	+	20	30	40	40	T01	49	0	0	1	GTAG	NA	ANCHOR_UNIQUE,CANONICAL,CIRCULAR,PERFECT_EXT,UNAMBIGUOUS_BP
16	83906986	83912367	5circ_001994	5	+	3	5	40	40	T01	5	0	0	1	GTAG	NA	ANCHOR_UNIQUE,CANONICAL,CIRCULAR,PERFECT_EXT,UNAMBIGUOUS_BP
17	59878102	59886230	5circ_001995	4	-	1	4	5	5	T01	4	1	0	1	GTAG	NA	ANCHOR_UNIQUE,CANONICAL,CIRCULAR,GOOD_EXT,UNAMBIGUOUS_BP
8	17195522	17220921	5circ_001997	10	+	5	9	40	40	T01	10	0	0	1	GTAG	NA	ANCHOR_UNIQUE,CANONICAL,CIRCULAR,PERFECT_EXT,UNAMBIGUOUS_BP
12	132525733	132528553	5circ_001998	3	+	2	1	40	5	T01	3	0	0	1	GTAG	NA	ANCHOR_UNIQUE,CANONICAL,CIRCULAR,PERFECT_EXT,UNAMBIGUOUS_BP
7	1009949	1010300	5circ_001999	2	-	2	2	5	40	T01	2	1	0	1	GTAG	NA	ANCHOR_UNIQUE,CANONICAL,CIRCULAR,GOOD_EXT,UNAMBIGUOUS_BP
19	37199399	37207254	5circ_002000	7	-	7	3	35	40	T01	7	0	0	1	GTAG	NA	ANCHOR_UNIQUE,CANONICAL,CIRCULAR,PERFECT_EXT,UNAMBIGUOUS_BP
15	63727646	63749791	5circ_002001	2	-	1	2	5	5	T01	2	0	0	1	GTAG	NA	ANCHOR_UNIQUE,CANONICAL,CIRCULAR,PERFECT_EXT,UNAMBIGUOUS_BP
X	361404	362332	5circ_002002	11	-	6	11	40	40	T01	11	0	0	1	GTAG	NA	ANCHOR_UNIQUE,CANONICAL,CIRCULAR,PERFECT_EXT,UNAMBIGUOUS_BP
9	85692688	85723868	5circ_002003	2	-	1	2	5	5	T01	2	0	0	1	GTAG	NA	ANCHOR_UNIQUE,CANONICAL,CIRCULAR,PERFECT_EXT,UNAMBIGUOUS_BP
3	58394997	58397200	5circ_002004	2	+	2	2	40	40	T01	2	0	0	1	GTAG	NA	ANCHOR_UNIQUE,CANONICAL,CIRCULAR,PERFECT_EXT,UNAMBIGUOUS_BP
7	152194008	152199459	5circ_002006	2	-	1	2	40	5	T01	2	0	0	1	GTAG	NA	ANCHOR_UNIQUE,CANONICAL,CIRCULAR,PERFECT_EXT,UNAMBIGUOUS_BP
1	155352705	155357749	5circ_002008	3	-	2	3	5	37	T01	3	0	0	1	GTAG	NA	ANCHOR_UNIQUE,CANONICAL,CIRCULAR,PERFECT_EXT,UNAMBIGUOUS_BP
15	92978233	92979283	5circ_002009	3	+	2	3	5	40	T01	3	0	0	1	GTAG	NA	ANCHOR_UNIQUE,CANONICAL,CIRCULAR,PERFECT_EXT,UNAMBIGUOUS_BP
1	246647138	246660334	5circ_002010	3	+	1	3	5	40	T01	3	0	0	1	GTAG	NA	ANCHOR_UNIQUE,CANONICAL,CIRCULAR,PERFECT_EXT,UNAMBIGUOUS_BP
4	17628005	17633545	5circ_002011	2	+	2	2	40	40	T01	2	0	0	1	GTAG	NA	ANCHOR_UNIQUE,CANONICAL,CIRCULAR,PERFECT_EXT,UNAMBIGUOUS_BP
1	243293090	243330692	5circ_002012	2	+	2	2	5	5	T01	2	0	0	1	GTAG	NA	ANCHOR_UNIQUE,CANONICAL,CIRCULAR,PERFECT_EXT,UNAMBIGUOUS_BP
3	179378584	179386629	5circ_002013	3	+	3	2	5	40	T01	3	0	0	1	GTAG	NA	ANCHOR_UNIQUE,CANONICAL,CIRCULAR,PERFECT_EXT,UNAMBIGUOUS_BP
16	11515928	11516307	5circ_002014	16	-	3	16	40	5	T01	16	0	0	1	GTAG	NA	ANCHOR_UNIQUE,CANONICAL,CIRCULAR,PERFECT_EXT,UNAMBIGUOUS_BP
17	20245925	20306082	5circ_002015	7	+	3	7	40	40	T01	7	0	0	1	GTAG	NA	ANCHOR_UNIQUE,CANONICAL,CIRCULAR,PERFECT_EXT,UNAMBIGUOUS_BP
16	11123741	11123946	5circ_002017	4	+	2	4	40	40	T01	4	0	0	1	GTAG	NA	ANCHOR_UNIQUE,CANONICAL,CIRCULAR,PERFECT_EXT,UNAMBIGUOUS_BP
2	235930764	235968623	5circ_002018	2	+	1	2	5	5	T01	2	0	0	1	GTAG	NA	ANCHOR_UNIQUE,CANONICAL,CIRCULAR,PERFECT_EXT,UNAMBIGUOUS_BP
7	102189812	102197305	5circ_002019	2	+	1	2	5	40	T01	2	0	0	1	GTAG	NA	ANCHOR_UNIQUE,CANONICAL,CIRCULAR,PERFECT_EXT,UNAMBIGUOUS_BP
1	32368446	32381268	5circ_002020	4	-	1	4	40	40	T01	4	0	0	1	GTAG	NA	ANCHOR_UNIQUE,CANONICAL,CIRCULAR,PERFECT_EXT,UNAMBIGUOUS_BP
16	66805776	66806026	5circ_002021	3	-	1	3	40	40	T01	3	0	0	1	GTAG	NA	ANCHOR_UNIQUE,CANONICAL,CIRCULAR,PERFECT_EXT,UNAMBIGUOUS_BP
X	154788026	154792285	5circ_002022	3	-	1	3	40	40	T01	3	0	0	1	GTAG	NA	ANCHOR_UNIQUE,CANONICAL,CIRCULAR,PERFECT_EXT,UNAMBIGUOUS_BP
7	135637930	135646231	5circ_002023	3	+	1	3	5	5	T01	3	0	0	1	GTAG	NA	ANCHOR_UNIQUE,CANONICAL,CIRCULAR,PERFECT_EXT,UNAMBIGUOUS_BP
21	36333645	36345031	5circ_002025	3	+	2	3	40	40	T01	3	0	0	1	GTAG	NA	ANCHOR_UNIQUE,CANONICAL,CIRCULAR,PERFECT_EXT,UNAMBIGUOUS_BP
1	65364634	65379524	5circ_002026	2	+	1	2	40	35	T01	2	0	0	1	GTAG	NA	ANCHOR_UNIQUE,CANONICAL,CIRCULAR,PERFECT_EXT,UNAMBIGUOUS_BP
13	28260446	28280541	5circ_002028	4	+	1	4	35	40	T01	4	0	0	1	GTAG	NA	ANCHOR_UNIQUE,CANONICAL,CIRCULAR,PERFECT_EXT,UNAMBIGUOUS_BP
1	115992030	116020885	5circ_002029	4	+	1	4	40	5	T01	4	0	0	1	GTAG	NA	ANCHOR_UNIQUE,CANONICAL,CIRCULAR,PERFECT_EXT,UNAMBIGUOUS_BP
8	52673844	52684013	5circ_002030	3	-	3	3	40	5	T01	3	0	0	1	GTAG	NA	ANCHOR_UNIQUE,CANONICAL,CIRCULAR,PERFECT_EXT,UNAMBIGUOUS_BP
5	57246299	57247215	5circ_002031	11	+	7	9	40	40	T01	11	0	0	1	GTAG	NA	ANCHOR_UNIQUE,CANONICAL,CIRCULAR,PERFECT_EXT,UNAMBIGUOUS_BP
16	53439015	53451831	5circ_002033	2	+	1	2	40	40	T01	2	0	0	1	GTAG	NA	ANCHOR_UNIQUE,CANONICAL,CIRCULAR,PERFECT_EXT,UNAMBIGUOUS_BP
2	226864603	226924163	5circ_002034	7	+	3	7	40	5	T01	7	0	0	1	GTAG	NA	ANCHOR_UNIQUE,CANONICAL,CIRCULAR,PERFECT_EXT,UNAMBIGUOUS_BP
20	63629535	63629892	5circ_002035	9	+	4	8	40	40	T01	9	0	0	1	GTAG	NA	ANCHOR_UNIQUE,CANONICAL,CIRCULAR,PERFECT_EXT,UNAMBIGUOUS_BP
X	148651998	148662768	5circ_002036	12	+	11	12	40	40	T01	12	0	0	1	GTAG	NA	ANCHOR_UNIQUE,CANONICAL,CIRCULAR,PERFECT_EXT,UNAMBIGUOUS_BP
7	30550635	30562128	5circ_002038	10	-	7	10	40	40	T01	10	0	0	1	GTAG	NA	ANCHOR_UNIQUE,CANONICAL,CIRCULAR,PERFECT_EXT,UNAMBIGUOUS_BP
X	155506897	155545277	5circ_002041	3	-	1	3	5	5	T01	3	0	0	1	GTAG	NA	ANCHOR_UNIQUE,CANONICAL,CIRCULAR,PERFECT_EXT,UNAMBIGUOUS_BP
4	159126526	159128038	5circ_002042	2	+	1	2	5	5	T01	2	0	0	1	GTAG	NA	ANCHOR_UNIQUE,CANONICAL,CIRCULAR,PERFECT_EXT,UNAMBIGUOUS_BP
22	41168448	41173784	5circ_002043	2	+	2	2	40	40	T01	2	0	0	1	GTAG	NA	ANCHOR_UNIQUE,CANONICAL,CIRCULAR,PERFECT_EXT,UNAMBIGUOUS_BP
2	24510968	24584560	5circ_002044	2	+	2	1	5	40	T01	2	0	0	1	GTAG	NA	ANCHOR_UNIQUE,CANONICAL,CIRCULAR,PERFECT_EXT,UNAMBIGUOUS_BP
2	42695764	42723035	5circ_002045	2	+	2	2	40	40	T01	2	0	0	1	GTAG	NA	ANCHOR_UNIQUE,CANONICAL,CIRCULAR,PERFECT_EXT,UNAMBIGUOUS_BP
1	15717892	15721388	5circ_002046	13	+	5	12	40	5	T01	13	0	0	1	GTAG	NA	ANCHOR_UNIQUE,CANONICAL,CIRCULAR,PERFECT_EXT,UNAMBIGUOUS_BP
7	32543140	32558628	5circ_002047	3	+	1	3	40	40	T01	3	0	0	1	GTAG	NA	ANCHOR_UNIQUE,CANONICAL,CIRCULAR,PERFECT_EXT,UNAMBIGUOUS_BP
17	59737452	59817773	5circ_002048	4	+	1	4	5	5	T01	4	0	0	1	GTAG	NA	ANCHOR_UNIQUE,CANONICAL,CIRCULAR,PERFECT_EXT,UNAMBIGUOUS_BP
1	179986168	179992221	5circ_002049	3	+	2	3	5	40	T01	3	0	0	1	GTAG	NA	ANCHOR_UNIQUE,CANONICAL,CIRCULAR,PERFECT_EXT,UNAMBIGUOUS_BP
8	31141429	31150455	5circ_002051	14	+	8	14	40	40	T01	14	0	0	1	GTAG	NA	ANCHOR_UNIQUE,CANONICAL,CIRCULAR,PERFECT_EXT,UNAMBIGUOUS_BP
13	20064450	20071923	5circ_002052	2	+	1	2	40	40	T01	2	0	0	1	GTAG	NA	ANCHOR_UNIQUE,CANONICAL,CIRCULAR,PERFECT_EXT,UNAMBIGUOUS_BP
4	107682014	107694006	5circ_002054	2	-	1	2	40	5	T01	2	0	0	1	GTAG	NA	ANCHOR_UNIQUE,CANONICAL,CIRCULAR,PERFECT_EXT,UNAMBIGUOUS_BP
5	179614959	179615545	5circ_002057	2	-	1	2	40	5	T01	2	0	0	1	GTAG	NA	ANCHOR_UNIQUE,CANONICAL,CIRCULAR,PERFECT_EXT,UNAMBIGUOUS_BP
10	102381126	102382210	5circ_002058	3	+	1	3	5	40	T01	3	0	0	1	GTAG	NA	ANCHOR_UNIQUE,CANONICAL,CIRCULAR,PERFECT_EXT,UNAMBIGUOUS_BP
9	120824493	120833456	5circ_002059	6	-	2	6	5	40	T01	6	0	0	1	GTAG	NA	ANCHOR_UNIQUE,CANONICAL,CIRCULAR,PERFECT_EXT,UNAMBIGUOUS_BP
16	30707182	30707712	5circ_002060	2	+	2	2	40	40	T01	2	0	0	1	GTAG	NA	ANCHOR_UNIQUE,CANONICAL,CIRCULAR,PERFECT_EXT,UNAMBIGUOUS_BP
8	38247712	38260147	5circ_002061	2	+	1	2	5	40	T01	2	0	0	1	GTAG	NA	ANCHOR_UNIQUE,CANONICAL,CIRCULAR,PERFECT_EXT,UNAMBIGUOUS_BP
11	3768580	3782145	5circ_002062	10	-	2	10	40	40	T01	10	0	0	1	GTAG	NA	ANCHOR_UNIQUE,CANONICAL,CIRCULAR,PERFECT_EXT,UNAMBIGUOUS_BP
19	41807436	41808630	5circ_002063	3	-	1	3	5	40	T01	3	2	0	1	GTAG	NA	ANCHOR_UNIQUE,CANONICAL,CIRCULAR,OK_EXT,UNAMBIGUOUS_BP
2	61482956	61490776	5circ_002065	23	-	9	22	40	40	T01	23	0	0	1	GTAG	NA	ANCHOR_UNIQUE,CANONICAL,CIRCULAR,PERFECT_EXT,UNAMBIGUOUS_BP
2	161179613	161204793	5circ_002066	18	+	10	18	40	40	T01	18	0	0	1	GTAG	NA	ANCHOR_UNIQUE,CANONICAL,CIRCULAR,PERFECT_EXT,UNAMBIGUOUS_BP
15	64499292	64500166	5circ_002067	381	+	99	373	40	40	T01	381	0	0	1	GTAG	NA	ANCHOR_UNIQUE,CANONICAL,CIRCULAR,PERFECT_EXT,UNAMBIGUOUS_BP
16	71738941	71745614	5circ_002068	3	-	1	3	40	40	T01	3	0	0	1	GTAG	NA	ANCHOR_UNIQUE,CANONICAL,CIRCULAR,PERFECT_EXT,UNAMBIGUOUS_BP
7	77944459	77953894	5circ_002070	4	+	3	2	5	40	T01	4	0	0	1	GTAG	NA	ANCHOR_UNIQUE,CANONICAL,CIRCULAR,PERFECT_EXT,UNAMBIGUOUS_BP
10	45452843	45461411	5circ_002071	3	-	1	3	40	5	T01	3	0	0	1	GTAG	NA	ANCHOR_UNIQUE,CANONICAL,CIRCULAR,PERFECT_EXT,UNAMBIGUOUS_BP
5	137952627	137954376	5circ_002073	8	-	6	8	40	40	T01	8	0	0	1	GTAG	NA	ANCHOR_UNIQUE,CANONICAL,CIRCULAR,PERFECT_EXT,UNAMBIGUOUS_BP
20	34017409	34033239	5circ_002074	3	+	1	3	5	5	T01	3	1	0	1	GTAG	NA	ANCHOR_UNIQUE,CANONICAL,CIRCULAR,GOOD_EXT,UNAMBIGUOUS_BP
8	60222648	60232379	5circ_002075	4	-	1	4	40	5	T01	4	0	0	1	GTAG	NA	ANCHOR_UNIQUE,CANONICAL,CIRCULAR,PERFECT_EXT,UNAMBIGUOUS_BP
17	75225102	75226157	5circ_002076	3	+	2	3	40	5	T01	3	0	0	1	GTAG	NA	ANCHOR_UNIQUE,CANONICAL,CIRCULAR,PERFECT_EXT,UNAMBIGUOUS_BP
3	170171389	170178938	5circ_002077	2	-	1	2	40	5	T01	2	0	0	1	GTAG	NA	ANCHOR_UNIQUE,CANONICAL,CIRCULAR,PERFECT_EXT,UNAMBIGUOUS_BP
17	61987006	62011233	5circ_002078	2	-	1	2	40	40	T01	2	0	0	1	GTAG	NA	ANCHOR_UNIQUE,CANONICAL,CIRCULAR,PERFECT_EXT,UNAMBIGUOUS_BP
20	33372641	33379691	5circ_002079	2	-	1	2	35	5	T01	2	0	0	1	GTAG	NA	ANCHOR_UNIQUE,CANONICAL,CIRCULAR,PERFECT_EXT,UNAMBIGUOUS_BP
13	48166275	48183050	5circ_002080	2	-	1	2	40	5	T01	2	0	0	1	GTAG	NA	ANCHOR_UNIQUE,CANONICAL,CIRCULAR,PERFECT_EXT,UNAMBIGUOUS_BP
12	112203635	112228866	5circ_002081	2	-	2	2	40	40	T01	2	0	0	1	GTAG	NA	ANCHOR_UNIQUE,CANONICAL,CIRCULAR,PERFECT_EXT,UNAMBIGUOUS_BP
20	33372641	33387533	5circ_002082	3	-	2	3	40	5	T01	3	0	0	1	GTAG	NA	ANCHOR_UNIQUE,CANONICAL,CIRCULAR,PERFECT_EXT,UNAMBIGUOUS_BP
3	177064919	177098541	5circ_002083	3	-	1	3	40	40	T01	3	0	0	1	GTAG	NA	ANCHOR_UNIQUE,CANONICAL,CIRCULAR,PERFECT_EXT,UNAMBIGUOUS_BP
1	61111370	61140329	5circ_002084	2	+	1	2	40	40	T01	2	0	0	1	GTAG	NA	ANCHOR_UNIQUE,CANONICAL,CIRCULAR,PERFECT_EXT,UNAMBIGUOUS_BP
3	53288064	53292827	5circ_002085	2	-	1	2	40	40	T01	2	0	0	1	GTAG	NA	ANCHOR_UNIQUE,CANONICAL,CIRCULAR,PERFECT_EXT,UNAMBIGUOUS_BP
14	92946330	92958366	5circ_002086	10	-	2	10	40	5	T01	10	0	0	1	GTAG	NA	ANCHOR_UNIQUE,CANONICAL,CIRCULAR,PERFECT_EXT,UNAMBIGUOUS_BP
16	71658232	71664099	5circ_002087	7	-	5	6	40	40	T01	7	0	0	1	GTAG	NA	ANCHOR_UNIQUE,CANONICAL,CIRCULAR,PERFECT_EXT,UNAMBIGUOUS_BP
8	21991867	22004030	5circ_002088	16	+	6	14	40	40	T01	16	0	0	1	GTAG	NA	ANCHOR_UNIQUE,CANONICAL,CIRCULAR,PERFECT_EXT,UNAMBIGUOUS_BP
X	78009101	78015881	5circ_002089	2	+	2	2	40	5	T01	2	0	0	1	GTAG	NA	ANCHOR_UNIQUE,CANONICAL,CIRCULAR,PERFECT_EXT,UNAMBIGUOUS_BP
7	65964322	65976202	5circ_002090	2	-	1	2	5	40	T01	2	0	0	1	GTAG	NA	ANCHOR_UNIQUE,CANONICAL,CIRCULAR,PERFECT_EXT,UNAMBIGUOUS_BP
18	70121555	70128546	5circ_002092	6	-	2	6	5	40	T01	6	0	0	1	GTAG	NA	ANCHOR_UNIQUE,CANONICAL,CIRCULAR,PERFECT_EXT,UNAMBIGUOUS_BP
20	44981828	44987296	5circ_002094	2	+	1	2	40	5	T01	2	0	0	1	GTAG	NA	ANCHOR_UNIQUE,CANONICAL,CIRCULAR,PERFECT_EXT,UNAMBIGUOUS_BP
1	227016079	227029250	5circ_002095	2	-	1	2	40	40	T01	2	0	0	1	GTAG	NA	ANCHOR_UNIQUE,CANONICAL,CIRCULAR,PERFECT_EXT,UNAMBIGUOUS_BP
8	91018389	91024366	5circ_002096	2	-	1	2	5	5	T01	2	0	0	1	GTAG	NA	ANCHOR_UNIQUE,CANONICAL,CIRCULAR,PERFECT_EXT,UNAMBIGUOUS_BP
19	10637643	10638315	5circ_002097	10	+	4	10	40	40	T01	10	0	0	1	GTAG	NA	ANCHOR_UNIQUE,CANONICAL,CIRCULAR,PERFECT_EXT,UNAMBIGUOUS_BP
15	45415586	45418682	5circ_002101	3	+	1	3	40	5	T01	3	0	0	1	GTAG	NA	ANCHOR_UNIQUE,CANONICAL,CIRCULAR,PERFECT_EXT,UNAMBIGUOUS_BP
4	48581419	48589877	5circ_002103	3	-	2	3	40	40	T01	3	0	0	1	GTAG	NA	ANCHOR_UNIQUE,CANONICAL,CIRCULAR,PERFECT_EXT,UNAMBIGUOUS_BP
7	24623662	24650712	5circ_002104	4	+	4	4	40	40	T01	4	0	0	1	GTAG	NA	ANCHOR_UNIQUE,CANONICAL,CIRCULAR,PERFECT_EXT,UNAMBIGUOUS_BP
9	87931056	87934056	5circ_002106	9	-	6	6	5	5	T01	9	0	0	1	GTAG	NA	ANCHOR_UNIQUE,CANONICAL,CIRCULAR,PERFECT_EXT,UNAMBIGUOUS_BP
4	150867670	150893149	5circ_002107	3	-	1	3	40	5	T01	3	0	0	1	GTAG	NA	ANCHOR_UNIQUE,CANONICAL,CIRCULAR,PERFECT_EXT,UNAMBIGUOUS_BP
18	708831	709155	5circ_002108	5	-	3	5	5	40	T01	5	0	0	1	GTAG	NA	ANCHOR_UNIQUE,CANONICAL,CIRCULAR,PERFECT_EXT,UNAMBIGUOUS_BP
15	89113724	89116521	5circ_002109	218	+	68	211	40	40	T01	218	0	0	1	GTAG	NA	ANCHOR_UNIQUE,CANONICAL,CIRCULAR,PERFECT_EXT,UNAMBIGUOUS_BP
1	12578717	12579412	5circ_002112	23	-	6	20	40	40	T01	23	0	0	1	GTAG	NA	ANCHOR_UNIQUE,CANONICAL,CIRCULAR,PERFECT_EXT,UNAMBIGUOUS_BP
17	16101249	16101805	5circ_002113	64	-	26	57	40	40	T01	64	0	0	1	GTAG	NA	ANCHOR_UNIQUE,CANONICAL,CIRCULAR,PERFECT_EXT,UNAMBIGUOUS_BP
6	43546570	43555964	5circ_002114	6	-	2	6	40	40	T01	6	0	0	1	GTAG	NA	ANCHOR_UNIQUE,CANONICAL,CIRCULAR,PERFECT_EXT,UNAMBIGUOUS_BP
17	61015750	61034790	5circ_002115	2	+	2	2	40	40	T01	2	0	0	1	GTAG	NA	ANCHOR_UNIQUE,CANONICAL,CIRCULAR,PERFECT_EXT,UNAMBIGUOUS_BP
7	127371724	127391615	5circ_002117	3	-	1	3	5	5	T01	3	0	0	1	GTAG	NA	ANCHOR_UNIQUE,CANONICAL,CIRCULAR,PERFECT_EXT,UNAMBIGUOUS_BP
14	31156839	31157303	5circ_002118	2	-	1	2	40	5	T01	2	0	0	1	GTAG	NA	ANCHOR_UNIQUE,CANONICAL,CIRCULAR,PERFECT_EXT,UNAMBIGUOUS_BP
20	47246007	47249439	5circ_002119	15	-	10	15	40	40	T01	15	0	0	1	GTAG	NA	ANCHOR_UNIQUE,CANONICAL,CIRCULAR,PERFECT_EXT,UNAMBIGUOUS_BP
20	62162751	62163622	5circ_002120	14	+	7	11	40	40	T01	14	0	0	1	GTAG	NA	ANCHOR_UNIQUE,CANONICAL,CIRCULAR,PERFECT_EXT,UNAMBIGUOUS_BP
3	141903619	141925639	5circ_002122	2	+	1	2	5	5	T01	2	0	0	1	GTAG	NA	ANCHOR_UNIQUE,CANONICAL,CIRCULAR,PERFECT_EXT,UNAMBIGUOUS_BP
16	20821761	20833123	5circ_002123	3	+	1	3	35	40	T01	3	0	0	1	GTAG	NA	ANCHOR_UNIQUE,CANONICAL,CIRCULAR,PERFECT_EXT,UNAMBIGUOUS_BP
17	82464286	82472698	5circ_002125	2	+	1	2	40	35	T01	2	0	1	1	GTAG	NA	ANCHOR_UNIQUE,CANONICAL,CIRCULAR,GOOD_EXT,UNAMBIGUOUS_BP
12	3713236	3743635	5circ_002126	2	-	2	2	5	5	T01	2	0	0	1	GTAG	NA	ANCHOR_UNIQUE,CANONICAL,CIRCULAR,PERFECT_EXT,UNAMBIGUOUS_BP
15	44633504	44657263	5circ_002127	4	-	2	4	5	40	T01	4	0	0	1	GTAG	NA	ANCHOR_UNIQUE,CANONICAL,CIRCULAR,PERFECT_EXT,UNAMBIGUOUS_BP
4	186628153	186639783	5circ_002128	2	-	2	2	40	40	T01	2	0	0	1	GTAG	NA	ANCHOR_UNIQUE,CANONICAL,CIRCULAR,PERFECT_EXT,UNAMBIGUOUS_BP
1	12362719	12416827	5circ_002132	8	+	3	4	40	40	T01	8	0	0	1	GTAG	NA	ANCHOR_UNIQUE,CANONICAL,CIRCULAR,PERFECT_EXT,UNAMBIGUOUS_BP
6	87345076	87371712	5circ_002133	4	+	2	4	5	35	T01	4	0	0	1	GTAG	NA	ANCHOR_UNIQUE,CANONICAL,CIRCULAR,PERFECT_EXT,UNAMBIGUOUS_BP
11	34957383	34984728	5circ_002134	16	+	9	16	40	40	T01	16	0	0	1	GTAG	NA	ANCHOR_UNIQUE,CANONICAL,CIRCULAR,PERFECT_EXT,UNAMBIGUOUS_BP
8	94534838	94543942	5circ_002137	2	-	2	2	5	40	T01	2	0	0	1	GTAG	NA	ANCHOR_UNIQUE,CANONICAL,CIRCULAR,PERFECT_EXT,UNAMBIGUOUS_BP
20	43973366	44054526	5circ_002138	2	+	1	2	5	40	T01	2	0	0	1	GTAG	NA	ANCHOR_UNIQUE,CANONICAL,CIRCULAR,PERFECT_EXT,UNAMBIGUOUS_BP
9	79720045	79766837	5circ_002139	7	+	2	4	40	40	T01	7	0	0	1	GTAG	NA	ANCHOR_UNIQUE,CANONICAL,CIRCULAR,PERFECT_EXT,UNAMBIGUOUS_BP
9	107300140	107306647	5circ_002141	8	+	5	8	40	40	T01	8	0	0	1	GTAG	NA	ANCHOR_UNIQUE,CANONICAL,CIRCULAR,PERFECT_EXT,UNAMBIGUOUS_BP
7	107580758	107613432	5circ_002143	3	+	1	3	35	5	T01	3	0	0	1	GTAG	NA	ANCHOR_UNIQUE,CANONICAL,CIRCULAR,PERFECT_EXT,UNAMBIGUOUS_BP
12	26990449	26999676	5circ_002144	7	-	3	7	40	40	T01	7	0	0	1	GTAG	NA	ANCHOR_UNIQUE,CANONICAL,CIRCULAR,PERFECT_EXT,UNAMBIGUOUS_BP
22	43173714	43176396	5circ_002145	8	-	5	8	40	40	T01	8	0	0	1	GTAG	NA	ANCHOR_UNIQUE,CANONICAL,CIRCULAR,PERFECT_EXT,UNAMBIGUOUS_BP
3	129265548	129267099	5circ_002146	9	+	5	8	40	40	T01	9	0	0	1	GTAG	NA	ANCHOR_UNIQUE,CANONICAL,CIRCULAR,PERFECT_EXT,UNAMBIGUOUS_BP
20	32083893	32086807	5circ_002147	8	+	1	8	5	40	T01	8	0	0	1	GTAG	NA	ANCHOR_UNIQUE,CANONICAL,CIRCULAR,PERFECT_EXT,UNAMBIGUOUS_BP
18	13059081	13073185	5circ_002148	4	+	1	4	40	40	T01	4	0	0	1	GTAG	NA	ANCHOR_UNIQUE,CANONICAL,CIRCULAR,PERFECT_EXT,UNAMBIGUOUS_BP
8	99511103	99521010	5circ_002150	3	+	1	3	5	5	T01	3	0	0	1	GTAG	NA	ANCHOR_UNIQUE,CANONICAL,CIRCULAR,PERFECT_EXT,UNAMBIGUOUS_BP
16	88697	93325	5circ_002151	4	-	2	4	40	5	T01	4	0	0	1	GTAG	NA	ANCHOR_UNIQUE,CANONICAL,CIRCULAR,PERFECT_EXT,UNAMBIGUOUS_BP
X	77971620	77989958	5circ_002152	6	+	2	6	40	40	T01	6	0	0	1	GTAG	NA	ANCHOR_UNIQUE,CANONICAL,CIRCULAR,PERFECT_EXT,UNAMBIGUOUS_BP
17	16101249	16101757	5circ_002153	5	-	2	5	40	40	T01	5	0	0	1	GTAG	NA	ANCHOR_UNIQUE,CANONICAL,CIRCULAR,PERFECT_EXT,UNAMBIGUOUS_BP
15	64622826	64623052	5circ_002154	4	+	1	4	5	40	T01	4	0	0	1	GTAG	NA	ANCHOR_UNIQUE,CANONICAL,CIRCULAR,PERFECT_EXT,UNAMBIGUOUS_BP
1	224411426	224413335	5circ_002155	3	-	1	3	40	35	T01	3	1	0	1	GTAG	NA	ANCHOR_UNIQUE,CANONICAL,CIRCULAR,GOOD_EXT,UNAMBIGUOUS_BP
1	1256044	1267992	5circ_002156	7	-	4	7	5	40	T01	7	0	0	1	GTAG	NA	ANCHOR_UNIQUE,CANONICAL,CIRCULAR,PERFECT_EXT,UNAMBIGUOUS_BP
3	100555208	100568967	5circ_002158	6	+	1	6	40	40	T01	6	0	0	1	GTAG	NA	ANCHOR_UNIQUE,CANONICAL,CIRCULAR,PERFECT_EXT,UNAMBIGUOUS_BP
15	63727646	63734827	5circ_002159	3	-	1	3	40	40	T01	3	0	0	1	GTAG	NA	ANCHOR_UNIQUE,CANONICAL,CIRCULAR,PERFECT_EXT,UNAMBIGUOUS_BP
17	29285991	29287716	5circ_002160	2	-	1	2	40	40	T01	2	0	0	1	GTAG	NA	ANCHOR_UNIQUE,CANONICAL,CIRCULAR,PERFECT_EXT,UNAMBIGUOUS_BP
17	42538338	42541206	5circ_002161	4	+	2	4	40	40	T01	4	0	0	1	GTAG	NA	ANCHOR_UNIQUE,CANONICAL,CIRCULAR,PERFECT_EXT,UNAMBIGUOUS_BP
10	102109034	102111536	5circ_002162	5	-	3	5	40	40	T01	5	0	0	1	GTAG	NA	ANCHOR_UNIQUE,CANONICAL,CIRCULAR,PERFECT_EXT,UNAMBIGUOUS_BP
13	95157160	95170628	5circ_002164	10	-	3	10	40	40	T01	10	0	0	1	GTAG	NA	ANCHOR_UNIQUE,CANONICAL,CIRCULAR,PERFECT_EXT,UNAMBIGUOUS_BP
17	82440996	82441266	5circ_002165	2	+	1	2	5	40	T01	2	0	0	1	GTAG	NA	ANCHOR_UNIQUE,CANONICAL,CIRCULAR,PERFECT_EXT,UNAMBIGUOUS_BP
13	24477700	24493733	5circ_002166	5	-	2	5	40	40	T01	5	0	0	1	GTAG	NA	ANCHOR_UNIQUE,CANONICAL,CIRCULAR,PERFECT_EXT,UNAMBIGUOUS_BP
8	47969797	47971468	5circ_002167	35	+	12	33	40	40	T01	35	0	0	1	GTAG	NA	ANCHOR_UNIQUE,CANONICAL,CIRCULAR,PERFECT_EXT,UNAMBIGUOUS_BP
14	34758703	34762223	5circ_002169	7	-	4	7	40	5	T01	7	0	0	1	GTAG	NA	ANCHOR_UNIQUE,CANONICAL,CIRCULAR,PERFECT_EXT,UNAMBIGUOUS_BP
12	108652271	108701323	5circ_002170	2	-	1	2	5	5	T01	2	0	0	1	GTAG	NA	ANCHOR_UNIQUE,CANONICAL,CIRCULAR,PERFECT_EXT,UNAMBIGUOUS_BP
1	151024610	151028944	5circ_002171	2	+	1	2	40	5	T01	2	0	0	1	GTAG	NA	ANCHOR_UNIQUE,CANONICAL,CIRCULAR,PERFECT_EXT,UNAMBIGUOUS_BP
18	23518889	23520313	5circ_002172	2	+	1	2	40	5	T01	2	1	0	1	GTAG	NA	ANCHOR_UNIQUE,CANONICAL,CIRCULAR,GOOD_EXT,UNAMBIGUOUS_BP
13	95177706	95210781	5circ_002174	7	-	2	7	40	40	T01	7	0	0	1	GTAG	NA	ANCHOR_UNIQUE,CANONICAL,CIRCULAR,PERFECT_EXT,UNAMBIGUOUS_BP
13	99238426	99244624	5circ_002175	76	+	41	64	40	40	T01	76	0	0	1	GTAG	NA	ANCHOR_UNIQUE,CANONICAL,CIRCULAR,PERFECT_EXT,UNAMBIGUOUS_BP
11	121045673	121053732	5circ_002176	6	+	4	6	40	40	T01	6	0	0	1	GTAG	NA	ANCHOR_UNIQUE,CANONICAL,CIRCULAR,PERFECT_EXT,UNAMBIGUOUS_BP
2	152123765	152150229	5circ_002178	3	-	1	3	40	40	T01	3	0	0	1	GTAG	NA	ANCHOR_UNIQUE,CANONICAL,CIRCULAR,PERFECT_EXT,UNAMBIGUOUS_BP
1	230663140	230675124	5circ_002180	7	+	2	7	40	5	T01	7	0	0	1	GTAG	NA	ANCHOR_UNIQUE,CANONICAL,CIRCULAR,PERFECT_EXT,UNAMBIGUOUS_BP
5	134199085	134206131	5circ_002181	10	-	5	10	40	40	T01	10	0	0	1	GTAG	NA	ANCHOR_UNIQUE,CANONICAL,CIRCULAR,PERFECT_EXT,UNAMBIGUOUS_BP
2	64718617	64718985	5circ_002182	2	+	1	2	5	5	T01	2	1	0	1	GTAG	NA	ANCHOR_UNIQUE,CANONICAL,CIRCULAR,GOOD_EXT,UNAMBIGUOUS_BP
12	48083590	48098124	5circ_002183	3	-	2	3	40	40	T01	3	0	0	1	GTAG	NA	ANCHOR_UNIQUE,CANONICAL,CIRCULAR,PERFECT_EXT,UNAMBIGUOUS_BP
17	51218929	51225183	5circ_002187	2	-	2	2	40	40	T01	2	0	0	1	GTAG	NA	ANCHOR_UNIQUE,CANONICAL,CIRCULAR,PERFECT_EXT,UNAMBIGUOUS_BP
X	136706907	136747592	5circ_002188	4	-	1	4	40	5	T01	4	0	0	1	GTAG	NA	ANCHOR_UNIQUE,CANONICAL,CIRCULAR,PERFECT_EXT,UNAMBIGUOUS_BP
X	139876692	139877277	5circ_002189	8	-	3	8	5	40	T01	8	0	0	1	GTAG	NA	ANCHOR_UNIQUE,CANONICAL,CIRCULAR,PERFECT_EXT,UNAMBIGUOUS_BP
16	71738941	71739341	5circ_002190	19	-	11	18	40	40	T01	19	0	0	1	GTAG	NA	ANCHOR_UNIQUE,CANONICAL,CIRCULAR,PERFECT_EXT,UNAMBIGUOUS_BP
1	29097806	29109437	5circ_002191	2	+	2	2	40	40	T01	2	0	0	1	GTAG	NA	ANCHOR_UNIQUE,CANONICAL,CIRCULAR,PERFECT_EXT,UNAMBIGUOUS_BP
13	95071661	95075551	5circ_002192	2	-	2	2	40	40	T01	2	0	0	1	GTAG	NA	ANCHOR_UNIQUE,CANONICAL,CIRCULAR,PERFECT_EXT,UNAMBIGUOUS_BP
17	62033786	62035608	5circ_002193	46	-	19	46	40	40	T01	46	0	0	1	GTAG	NA	ANCHOR_UNIQUE,CANONICAL,CIRCULAR,PERFECT_EXT,UNAMBIGUOUS_BP
17	68395072	68401450	5circ_002194	3	+	1	3	40	5	T01	3	0	0	1	GTAG	NA	ANCHOR_UNIQUE,CANONICAL,CIRCULAR,PERFECT_EXT,UNAMBIGUOUS_BP
17	32767635	32780784	5circ_002195	2	-	1	2	40	40	T01	2	0	0	1	GTAG	NA	ANCHOR_UNIQUE,CANONICAL,CIRCULAR,PERFECT_EXT,UNAMBIGUOUS_BP
8	41723124	41725946	5circ_002197	8	-	3	8	40	40	T01	8	0	0	1	GTAG	NA	ANCHOR_UNIQUE,CANONICAL,CIRCULAR,PERFECT_EXT,UNAMBIGUOUS_BP
6	57124733	57128840	5circ_002199	2	+	1	2	40	40	T01	2	0	0	1	GTAG	NA	ANCHOR_UNIQUE,CANONICAL,CIRCULAR,PERFECT_EXT,UNAMBIGUOUS_BP
1	100906851	100921841	5circ_002200	19	+	9	19	40	40	T01	19	0	0	1	GTAG	NA	ANCHOR_UNIQUE,CANONICAL,CIRCULAR,PERFECT_EXT,UNAMBIGUOUS_BP
8	30104299	30106843	5circ_002201	4	+	1	4	40	5	T01	4	0	0	1	GTAG	NA	ANCHOR_UNIQUE,CANONICAL,CIRCULAR,PERFECT_EXT,UNAMBIGUOUS_BP
2	40428472	40430301	5circ_002202	2	-	1	2	5	5	T01	2	0	0	1	GTAG	NA	ANCHOR_UNIQUE,CANONICAL,CIRCULAR,PERFECT_EXT,UNAMBIGUOUS_BP
X	284166	293218	5circ_002203	3	+	2	2	35	40	T01	3	0	0	1	GTAG	NA	ANCHOR_UNIQUE,CANONICAL,CIRCULAR,PERFECT_EXT,UNAMBIGUOUS_BP
17	16075533	16101805	5circ_002204	4	-	1	4	5	5	T01	4	0	0	1	GTAG	NA	ANCHOR_UNIQUE,CANONICAL,CIRCULAR,PERFECT_EXT,UNAMBIGUOUS_BP
2	197110765	197122792	5circ_002206	2	-	2	2	40	40	T01	2	0	0	1	GTAG	NA	ANCHOR_UNIQUE,CANONICAL,CIRCULAR,PERFECT_EXT,UNAMBIGUOUS_BP
22	31833914	31838845	5circ_002207	4	+	3	4	40	40	T01	4	0	0	1	GTAG	NA	ANCHOR_UNIQUE,CANONICAL,CIRCULAR,PERFECT_EXT,UNAMBIGUOUS_BP
14	91797784	91802421	5circ_002208	7	-	5	6	40	40	T01	7	0	0	1	GTAG	NA	ANCHOR_UNIQUE,CANONICAL,CIRCULAR,PERFECT_EXT,UNAMBIGUOUS_BP
10	75097711	75101961	5circ_002210	3	-	1	3	40	35	T01	3	0	0	1	GTAG	NA	ANCHOR_UNIQUE,CANONICAL,CIRCULAR,PERFECT_EXT,UNAMBIGUOUS_BP
19	53798242	53801397	5circ_002212	7	-	5	7	40	40	T01	7	0	0	1	GTAG	NA	ANCHOR_UNIQUE,CANONICAL,CIRCULAR,PERFECT_EXT,UNAMBIGUOUS_BP
20	16356329	16374409	5circ_002214	4	-	2	4	40	40	T01	4	0	0	1	GTAG	NA	ANCHOR_UNIQUE,CANONICAL,CIRCULAR,PERFECT_EXT,UNAMBIGUOUS_BP
18	70047970	70060042	5circ_002215	2	-	1	2	40	40	T01	2	0	0	1	GTAG	NA	ANCHOR_UNIQUE,CANONICAL,CIRCULAR,PERFECT_EXT,UNAMBIGUOUS_BP
14	72974079	72993357	5circ_002216	3	-	1	3	40	40	T01	3	0	0	1	GTAG	NA	ANCHOR_UNIQUE,CANONICAL,CIRCULAR,PERFECT_EXT,UNAMBIGUOUS_BP
1	168291159	168300483	5circ_002218	2	+	1	2	5	40	T01	2	0	0	1	GTAG	NA	ANCHOR_UNIQUE,CANONICAL,CIRCULAR,PERFECT_EXT,UNAMBIGUOUS_BP
1	23393878	23397955	5circ_002221	3	-	1	3	40	5	T01	3	0	0	1	GTAG	NA	ANCHOR_UNIQUE,CANONICAL,CIRCULAR,PERFECT_EXT,UNAMBIGUOUS_BP
15	42528326	42548456	5circ_002222	2	-	2	2	40	40	T01	2	0	0	1	GTAG	NA	ANCHOR_UNIQUE,CANONICAL,CIRCULAR,PERFECT_EXT,UNAMBIGUOUS_BP
6	145763286	145806421	5circ_002223	6	-	1	6	40	5	T01	6	0	0	1	GTAG	NA	ANCHOR_UNIQUE,CANONICAL,CIRCULAR,PERFECT_EXT,UNAMBIGUOUS_BP
2	25749695	25771540	5circ_002224	5	-	1	5	5	40	T01	5	0	0	1	GTAG	NA	ANCHOR_UNIQUE,CANONICAL,CIRCULAR,PERFECT_EXT,UNAMBIGUOUS_BP
9	2039465	2047484	5circ_002225	4	+	3	4	40	40	T01	4	0	0	1	GTAG	NA	ANCHOR_UNIQUE,CANONICAL,CIRCULAR,PERFECT_EXT,UNAMBIGUOUS_BP
13	32517856	32527532	5circ_002226	99	-	34	93	40	40	T01	99	0	0	1	GTAG	NA	ANCHOR_UNIQUE,CANONICAL,CIRCULAR,PERFECT_EXT,UNAMBIGUOUS_BP
17	4024918	4033002	5circ_002227	6	-	4	6	40	40	T01	6	0	0	1	GTAG	NA	ANCHOR_UNIQUE,CANONICAL,CIRCULAR,PERFECT_EXT,UNAMBIGUOUS_BP
15	51921495	51934354	5circ_002228	4	+	2	4	40	40	T01	4	2	0	1	GTAG	NA	ANCHOR_UNIQUE,CANONICAL,CIRCULAR,OK_EXT,UNAMBIGUOUS_BP
15	76287845	76292700	5circ_002229	3	-	1	3	40	40	T01	3	0	0	1	GTAG	NA	ANCHOR_UNIQUE,CANONICAL,CIRCULAR,PERFECT_EXT,UNAMBIGUOUS_BP
16	4463659	4469465	5circ_002231	8	-	2	8	40	40	T01	8	0	0	1	GTAG	NA	ANCHOR_UNIQUE,CANONICAL,CIRCULAR,PERFECT_EXT,UNAMBIGUOUS_BP
1	229539455	229542371	5circ_002234	4	-	3	2	5	40	T01	4	0	0	1	GTAG	NA	ANCHOR_UNIQUE,CANONICAL,CIRCULAR,PERFECT_EXT,UNAMBIGUOUS_BP
1	13715540	13742157	5circ_002235	2	+	1	2	5	40	T01	2	0	0	1	GTAG	NA	ANCHOR_UNIQUE,CANONICAL,CIRCULAR,PERFECT_EXT,UNAMBIGUOUS_BP
8	48029798	48062187	5circ_002236	8	+	1	8	5	5	T01	8	0	0	1	GTAG	NA	ANCHOR_UNIQUE,CANONICAL,CIRCULAR,PERFECT_EXT,UNAMBIGUOUS_BP
1	224411426	224424654	5circ_002237	9	-	3	9	40	40	T01	9	0	0	1	GTAG	NA	ANCHOR_UNIQUE,CANONICAL,CIRCULAR,PERFECT_EXT,UNAMBIGUOUS_BP
5	72848384	72855923	5circ_002239	3	+	1	3	35	5	T01	3	0	0	1	GTAG	NA	ANCHOR_UNIQUE,CANONICAL,CIRCULAR,PERFECT_EXT,UNAMBIGUOUS_BP
1	30950132	30967310	5circ_002240	9	-	3	9	40	40	T01	9	0	0	1	GTAG	NA	ANCHOR_UNIQUE,CANONICAL,CIRCULAR,PERFECT_EXT,UNAMBIGUOUS_BP
2	241253392	241255158	5circ_002241	4	-	2	4	40	35	T01	4	0	0	1	GTAG	NA	ANCHOR_UNIQUE,CANONICAL,CIRCULAR,PERFECT_EXT,UNAMBIGUOUS_BP
17	61776400	61780401	5circ_002242	20	-	11	18	40	40	T01	20	0	0	1	GTAG	NA	ANCHOR_UNIQUE,CANONICAL,CIRCULAR,PERFECT_EXT,UNAMBIGUOUS_BP
1	95140547	95151419	5circ_002244	2	+	2	2	40	5	T01	2	0	0	1	GTAG	NA	ANCHOR_UNIQUE,CANONICAL,CIRCULAR,PERFECT_EXT,UNAMBIGUOUS_BP
12	95988192	95990532	5circ_002245	3	-	2	3	40	5	T01	3	1	0	1	GTAG	NA	ANCHOR_UNIQUE,CANONICAL,CIRCULAR,GOOD_EXT,UNAMBIGUOUS_BP
17	2394042	2395454	5circ_002246	2	-	1	2	40	40	T01	2	0	0	1	GTAG	NA	ANCHOR_UNIQUE,CANONICAL,CIRCULAR,PERFECT_EXT,UNAMBIGUOUS_BP
12	120566824	120571291	5circ_002247	26	+	9	26	40	40	T01	26	0	0	1	GTAG	NA	ANCHOR_UNIQUE,CANONICAL,CIRCULAR,PERFECT_EXT,UNAMBIGUOUS_BP
17	58316022	58319294	5circ_002248	6	-	2	6	40	35	T01	6	0	0	1	GTAG	NA	ANCHOR_UNIQUE,CANONICAL,CIRCULAR,PERFECT_EXT,UNAMBIGUOUS_BP
1	229539487	229549434	5circ_002249	2	-	1	2	5	40	T01	2	0	0	1	GTAG	NA	ANCHOR_UNIQUE,CANONICAL,CIRCULAR,PERFECT_EXT,UNAMBIGUOUS_BP
11	68505144	68537891	5circ_002250	6	+	1	6	40	40	T01	6	0	0	1	GTAG	NA	ANCHOR_UNIQUE,CANONICAL,CIRCULAR,PERFECT_EXT,UNAMBIGUOUS_BP
17	62010549	62011233	5circ_002251	2	-	2	2	40	5	T01	2	0	0	1	GTAG	NA	ANCHOR_UNIQUE,CANONICAL,CIRCULAR,PERFECT_EXT,UNAMBIGUOUS_BP
13	21157921	21172681	5circ_002253	5	-	2	3	40	5	T01	5	1	0	1	GTAG	NA	ANCHOR_UNIQUE,CANONICAL,CIRCULAR,GOOD_EXT,UNAMBIGUOUS_BP
1	12275824	12278038	5circ_002255	6	+	2	6	5	40	T01	6	0	0	1	GTAG	NA	ANCHOR_UNIQUE,CANONICAL,CIRCULAR,PERFECT_EXT,UNAMBIGUOUS_BP
12	132796603	132825106	5circ_002256	2	-	1	2	5	5	T01	2	0	0	1	GTAG	NA	ANCHOR_UNIQUE,CANONICAL,CIRCULAR,PERFECT_EXT,UNAMBIGUOUS_BP
1	6667708	6681037	5circ_002258	3	-	1	3	40	40	T01	3	0	0	1	GTAG	NA	ANCHOR_UNIQUE,CANONICAL,CIRCULAR,PERFECT_EXT,UNAMBIGUOUS_BP
15	80151979	80162336	5circ_002259	2	+	2	2	40	40	T01	2	0	0	1	GTAG	NA	ANCHOR_UNIQUE,CANONICAL,CIRCULAR,PERFECT_EXT,UNAMBIGUOUS_BP
11	120475339	120477526	5circ_002260	7	+	5	6	40	5	T01	7	0	0	1	GTAG	NA	ANCHOR_UNIQUE,CANONICAL,CIRCULAR,PERFECT_EXT,UNAMBIGUOUS_BP
7	27647151	27649633	5circ_002261	8	-	2	8	40	40	T01	8	0	0	1	GTAG	NA	ANCHOR_UNIQUE,CANONICAL,CIRCULAR,PERFECT_EXT,UNAMBIGUOUS_BP
15	70051390	70066218	5circ_002262	2	-	1	2	40	5	T01	2	0	0	1	GTAG	NA	ANCHOR_UNIQUE,CANONICAL,CIRCULAR,PERFECT_EXT,UNAMBIGUOUS_BP
14	74802555	74821137	5circ_002263	8	+	1	8	40	5	T01	8	0	0	1	GTAG	NA	ANCHOR_UNIQUE,CANONICAL,CIRCULAR,PERFECT_EXT,UNAMBIGUOUS_BP
1	22501491	22502441	5circ_002264	2	+	1	2	5	5	T01	2	0	0	1	GTAG	NA	ANCHOR_UNIQUE,CANONICAL,CIRCULAR,PERFECT_EXT,UNAMBIGUOUS_BP
1	86734601	86742436	5circ_002265	2	+	1	2	5	40	T01	2	0	0	1	GTAG	NA	ANCHOR_UNIQUE,CANONICAL,CIRCULAR,PERFECT_EXT,UNAMBIGUOUS_BP
2	29121373	29135666	5circ_002267	11	+	2	11	40	40	T01	11	0	0	1	GTAG	NA	ANCHOR_UNIQUE,CANONICAL,CIRCULAR,PERFECT_EXT,UNAMBIGUOUS_BP
5	140440118	140449305	5circ_002268	7	+	5	6	40	40	T01	7	0	0	1	GTAG	NA	ANCHOR_UNIQUE,CANONICAL,CIRCULAR,PERFECT_EXT,UNAMBIGUOUS_BP
1	15638306	15651895	5circ_002269	24	+	11	24	40	40	T01	24	0	0	1	GTAG	NA	ANCHOR_UNIQUE,CANONICAL,CIRCULAR,PERFECT_EXT,UNAMBIGUOUS_BP
9	36642996	36665581	5circ_002270	5	+	2	5	40	40	T01	5	0	0	1	GTAG	NA	ANCHOR_UNIQUE,CANONICAL,CIRCULAR,PERFECT_EXT,UNAMBIGUOUS_BP
15	63649724	63659936	5circ_002271	2	-	1	2	40	40	T01	2	0	0	1	GTAG	NA	ANCHOR_UNIQUE,CANONICAL,CIRCULAR,PERFECT_EXT,UNAMBIGUOUS_BP
15	43400043	43401850	5circ_002273	7	+	7	7	40	40	T01	7	0	0	1	GTAG	NA	ANCHOR_UNIQUE,CANONICAL,CIRCULAR,PERFECT_EXT,UNAMBIGUOUS_BP
11	5226583	5227028	5circ_002274	3	+	1	3	40	5	T01	3	2	0	1	GTAG	NA	ANCHOR_UNIQUE,CANONICAL,CIRCULAR,OK_EXT,UNAMBIGUOUS_BP
19	18924232	18924979	5circ_002276	4	+	1	4	35	40	T01	4	0	0	1	GTAG	NA	ANCHOR_UNIQUE,CANONICAL,CIRCULAR,PERFECT_EXT,UNAMBIGUOUS_BP
12	14828516	14829462	5circ_002277	9	-	6	7	5	40	T01	9	0	0	1	GTAG	NA	ANCHOR_UNIQUE,CANONICAL,CIRCULAR,PERFECT_EXT,UNAMBIGUOUS_BP
5	109713519	109755456	5circ_002279	11	+	6	11	37	40	T01	11	0	0	1	GTAG	NA	ANCHOR_UNIQUE,CANONICAL,CIRCULAR,PERFECT_EXT,UNAMBIGUOUS_BP
20	34072065	34077245	5circ_002280	6	+	2	6	40	40	T01	6	0	0	1	GTAG	NA	ANCHOR_UNIQUE,CANONICAL,CIRCULAR,PERFECT_EXT,UNAMBIGUOUS_BP
3	149846010	149921227	5circ_002281	15	+	11	2	5	5	T01	15	0	0	1	GTAG	NA	ANCHOR_UNIQUE,CANONICAL,CIRCULAR,PERFECT_EXT,UNAMBIGUOUS_BP
15	34250297	34336752	5circ_002282	3	-	1	3	5	40	T01	3	0	0	1	GTAG	NA	ANCHOR_UNIQUE,CANONICAL,CIRCULAR,PERFECT_EXT,UNAMBIGUOUS_BP
6	167022408	167024894	5circ_002283	7	+	2	4	40	40	T01	7	1	0	1	GTAG	NA	ANCHOR_UNIQUE,CANONICAL,CIRCULAR,GOOD_EXT,UNAMBIGUOUS_BP
10	5794884	5800705	5circ_002284	8	-	3	8	40	40	T01	8	0	0	1	GTAG	NA	ANCHOR_UNIQUE,CANONICAL,CIRCULAR,PERFECT_EXT,UNAMBIGUOUS_BP
1	161791407	161802272	5circ_002285	8	+	4	6	40	40	T01	8	0	0	1	GTAG	NA	ANCHOR_UNIQUE,CANONICAL,CIRCULAR,PERFECT_EXT,UNAMBIGUOUS_BP
4	56964405	56974022	5circ_002286	3	-	1	3	5	5	T01	3	0	0	1	GTAG	NA	ANCHOR_UNIQUE,CANONICAL,CIRCULAR,PERFECT_EXT,UNAMBIGUOUS_BP
17	28641888	28644187	5circ_002287	4	-	1	4	40	35	T01	4	0	0	1	GTAG	NA	ANCHOR_UNIQUE,CANONICAL,CIRCULAR,PERFECT_EXT,UNAMBIGUOUS_BP
16	56939236	56940245	5circ_002288	12	+	6	12	40	40	T01	12	0	0	1	GTAG	NA	ANCHOR_UNIQUE,CANONICAL,CIRCULAR,PERFECT_EXT,UNAMBIGUOUS_BP
12	56142284	56142732	5circ_002289	4	+	2	4	40	40	T01	4	0	0	1	GTAG	NA	ANCHOR_UNIQUE,CANONICAL,CIRCULAR,PERFECT_EXT,UNAMBIGUOUS_BP
22	29978424	29998857	5circ_002290	2	+	1	2	5	5	T01	2	0	0	1	GTAG	NA	ANCHOR_UNIQUE,CANONICAL,CIRCULAR,PERFECT_EXT,UNAMBIGUOUS_BP
7	142063498	142065831	5circ_002292	7	+	2	5	5	40	T01	7	0	0	1	GTAG	NA	ANCHOR_UNIQUE,CANONICAL,CIRCULAR,PERFECT_EXT,UNAMBIGUOUS_BP
6	110746125	110785609	5circ_002293	3	-	3	1	5	5	T01	3	0	0	1	GTAG	NA	ANCHOR_UNIQUE,CANONICAL,CIRCULAR,PERFECT_EXT,UNAMBIGUOUS_BP
9	123440359	123457897	5circ_002294	18	-	5	18	40	40	T01	18	0	0	1	GTAG	NA	ANCHOR_UNIQUE,CANONICAL,CIRCULAR,PERFECT_EXT,UNAMBIGUOUS_BP
18	196636	204692	5circ_002295	6	+	6	6	40	5	T01	6	0	0	1	GTAG	NA	ANCHOR_UNIQUE,CANONICAL,CIRCULAR,PERFECT_EXT,UNAMBIGUOUS_BP
11	74843349	74845271	5circ_002297	9	-	4	9	40	5	T01	9	0	0	1	GTAG	NA	ANCHOR_UNIQUE,CANONICAL,CIRCULAR,PERFECT_EXT,UNAMBIGUOUS_BP
2	33257442	33263392	5circ_002298	2	+	2	2	40	40	T01	2	0	0	1	GTAG	NA	ANCHOR_UNIQUE,CANONICAL,CIRCULAR,PERFECT_EXT,UNAMBIGUOUS_BP
6	36479120	36484824	5circ_002300	3	+	1	3	40	40	T01	3	0	0	1	GTAG	NA	ANCHOR_UNIQUE,CANONICAL,CIRCULAR,PERFECT_EXT,UNAMBIGUOUS_BP
19	5039835	5082504	5circ_002301	5	+	3	5	40	40	T01	5	0	0	1	GTAG	NA	ANCHOR_UNIQUE,CANONICAL,CIRCULAR,PERFECT_EXT,UNAMBIGUOUS_BP
9	136215153	136226874	5circ_002303	5	-	2	5	40	40	T01	5	0	0	1	GTAG	NA	ANCHOR_UNIQUE,CANONICAL,CIRCULAR,PERFECT_EXT,UNAMBIGUOUS_BP
4	139125163	139177089	5circ_002304	2	-	2	2	40	40	T01	2	0	0	1	GTAG	NA	ANCHOR_UNIQUE,CANONICAL,CIRCULAR,PERFECT_EXT,UNAMBIGUOUS_BP
11	85974707	85981228	5circ_002305	4	-	2	4	40	40	T01	4	0	0	1	GTAG	NA	ANCHOR_UNIQUE,CANONICAL,CIRCULAR,PERFECT_EXT,UNAMBIGUOUS_BP
22	19041057	19048643	5circ_002306	2	-	2	2	40	40	T01	2	0	0	1	GTAG	NA	ANCHOR_UNIQUE,CANONICAL,CIRCULAR,PERFECT_EXT,UNAMBIGUOUS_BP
1	43569589	43592601	5circ_002307	2	+	1	2	40	40	T01	2	0	0	1	GTAG	NA	ANCHOR_UNIQUE,CANONICAL,CIRCULAR,PERFECT_EXT,UNAMBIGUOUS_BP
12	68302619	68303913	5circ_002308	5	-	1	5	5	5	T01	5	1	0	1	GTAG	NA	ANCHOR_UNIQUE,CANONICAL,CIRCULAR,GOOD_EXT,UNAMBIGUOUS_BP
19	47264602	47264946	5circ_002309	79	+	36	74	40	40	T01	79	0	0	1	GTAG	NA	ANCHOR_UNIQUE,CANONICAL,CIRCULAR,PERFECT_EXT,UNAMBIGUOUS_BP
15	63690540	63694894	5circ_002310	17	-	5	17	40	40	T01	17	0	0	1	GTAG	NA	ANCHOR_UNIQUE,CANONICAL,CIRCULAR,PERFECT_EXT,UNAMBIGUOUS_BP
3	179601729	179602797	5circ_002311	2	-	1	2	5	35	T01	2	0	0	1	GTAG	NA	ANCHOR_UNIQUE,CANONICAL,CIRCULAR,PERFECT_EXT,UNAMBIGUOUS_BP
10	75150513	75151106	5circ_002312	9	+	3	9	40	40	T01	9	0	0	1	GTAG	NA	ANCHOR_UNIQUE,CANONICAL,CIRCULAR,PERFECT_EXT,UNAMBIGUOUS_BP
10	92637183	92650517	5circ_002313	2	+	1	2	40	5	T01	2	0	0	1	GTAG	NA	ANCHOR_UNIQUE,CANONICAL,CIRCULAR,PERFECT_EXT,UNAMBIGUOUS_BP
7	140471882	140472405	5circ_002314	6	-	2	6	5	5	T01	6	0	0	1	GTAG	NA	ANCHOR_UNIQUE,CANONICAL,CIRCULAR,PERFECT_EXT,UNAMBIGUOUS_BP
14	96520054	96528006	5circ_002316	2	+	1	2	40	40	T01	2	0	0	1	GTAG	NA	ANCHOR_UNIQUE,CANONICAL,CIRCULAR,PERFECT_EXT,UNAMBIGUOUS_BP
2	75664561	75666053	5circ_002317	2	-	2	2	5	40	T01	2	0	0	1	GTAG	NA	ANCHOR_UNIQUE,CANONICAL,CIRCULAR,PERFECT_EXT,UNAMBIGUOUS_BP
10	13172375	13172765	5circ_002318	4	+	3	4	40	40	T01	4	0	0	1	GTAG	NA	ANCHOR_UNIQUE,CANONICAL,CIRCULAR,PERFECT_EXT,UNAMBIGUOUS_BP
1	247860616	247868063	5circ_002319	27	+	14	26	40	40	T01	27	0	0	1	GTAG	NA	ANCHOR_UNIQUE,CANONICAL,CIRCULAR,PERFECT_EXT,UNAMBIGUOUS_BP
18	46447562	46450799	5circ_002320	4	+	2	4	40	40	T01	4	0	0	1	GTAG	NA	ANCHOR_UNIQUE,CANONICAL,CIRCULAR,PERFECT_EXT,UNAMBIGUOUS_BP
3	111913318	111920419	5circ_002321	2	+	1	2	40	5	T01	2	0	0	1	GTAG	NA	ANCHOR_UNIQUE,CANONICAL,CIRCULAR,PERFECT_EXT,UNAMBIGUOUS_BP
14	22906194	22911403	5circ_002322	33	-	10	33	40	40	T01	33	0	0	1	GTAG	NA	ANCHOR_UNIQUE,CANONICAL,CIRCULAR,PERFECT_EXT,UNAMBIGUOUS_BP
2	121363171	121367831	5circ_002323	7	-	3	7	40	40	T01	7	0	0	1	GTAG	NA	ANCHOR_UNIQUE,CANONICAL,CIRCULAR,PERFECT_EXT,UNAMBIGUOUS_BP
12	132720677	132721217	5circ_002324	9	+	3	9	40	40	T01	9	0	0	1	GTAG	NA	ANCHOR_UNIQUE,CANONICAL,CIRCULAR,PERFECT_EXT,UNAMBIGUOUS_BP
6	154787860	154792976	5circ_002325	15	+	5	13	40	40	T01	15	0	0	1	GTAG	NA	ANCHOR_UNIQUE,CANONICAL,CIRCULAR,PERFECT_EXT,UNAMBIGUOUS_BP
15	92126060	92128489	5circ_002327	4	+	1	4	40	40	T01	4	0	0	1	GTAG	NA	ANCHOR_UNIQUE,CANONICAL,CIRCULAR,PERFECT_EXT,UNAMBIGUOUS_BP
20	10556230	10560820	5circ_002328	6	+	2	6	40	40	T01	6	0	0	1	GTAG	NA	ANCHOR_UNIQUE,CANONICAL,CIRCULAR,PERFECT_EXT,UNAMBIGUOUS_BP
5	73052362	73087753	5circ_002329	10	+	2	10	40	40	T01	10	0	0	1	GTAG	NA	ANCHOR_UNIQUE,CANONICAL,CIRCULAR,PERFECT_EXT,UNAMBIGUOUS_BP
13	113233176	113244514	5circ_002330	9	+	5	9	40	40	T01	9	0	0	1	GTAG	NA	ANCHOR_UNIQUE,CANONICAL,CIRCULAR,PERFECT_EXT,UNAMBIGUOUS_BP
12	112319224	112319742	5circ_002331	24	-	9	24	40	40	T01	24	0	0	1	GTAG	NA	ANCHOR_UNIQUE,CANONICAL,CIRCULAR,PERFECT_EXT,UNAMBIGUOUS_BP
10	84417770	84425893	5circ_002335	5	+	3	5	40	40	T01	5	0	0	1	GTAG	NA	ANCHOR_UNIQUE,CANONICAL,CIRCULAR,PERFECT_EXT,UNAMBIGUOUS_BP
11	121532463	121545429	5circ_002336	2	+	1	2	40	40	T01	2	0	0	1	GTAG	NA	ANCHOR_UNIQUE,CANONICAL,CIRCULAR,PERFECT_EXT,UNAMBIGUOUS_BP
11	66816052	66828364	5circ_002337	6	+	3	6	40	40	T01	6	0	0	1	GTAG	NA	ANCHOR_UNIQUE,CANONICAL,CIRCULAR,PERFECT_EXT,UNAMBIGUOUS_BP
1	93894613	93904588	5circ_002338	4	-	3	4	5	40	T01	4	0	0	1	GTAG	NA	ANCHOR_UNIQUE,CANONICAL,CIRCULAR,PERFECT_EXT,UNAMBIGUOUS_BP
11	16234581	16286213	5circ_002339	2	-	1	2	5	5	T01	2	1	0	1	GTAG	NA	ANCHOR_UNIQUE,CANONICAL,CIRCULAR,GOOD_EXT,UNAMBIGUOUS_BP
10	67988662	68044563	5circ_002340	3	-	1	3	5	40	T01	3	0	0	1	GTAG	NA	ANCHOR_UNIQUE,CANONICAL,CIRCULAR,PERFECT_EXT,UNAMBIGUOUS_BP
X	71129113	71132538	5circ_002341	2	+	2	2	40	5	T01	2	0	0	1	GTAG	NA	ANCHOR_UNIQUE,CANONICAL,CIRCULAR,PERFECT_EXT,UNAMBIGUOUS_BP
16	30716065	30716479	5circ_002342	12	+	7	12	40	40	T01	12	0	0	1	GTAG	NA	ANCHOR_UNIQUE,CANONICAL,CIRCULAR,PERFECT_EXT,UNAMBIGUOUS_BP
15	42794643	42817097	5circ_002344	3	-	3	3	5	40	T01	3	0	0	1	GTAG	NA	ANCHOR_UNIQUE,CANONICAL,CIRCULAR,PERFECT_EXT,UNAMBIGUOUS_BP
7	100075134	100077433	5circ_002345	2	-	2	1	40	40	T01	2	0	0	1	GTAG	NA	ANCHOR_UNIQUE,CANONICAL,CIRCULAR,PERFECT_EXT,UNAMBIGUOUS_BP
3	57864806	57865292	5circ_002349	8	+	3	8	5	37	T01	8	0	0	1	GTAG	NA	ANCHOR_UNIQUE,CANONICAL,CIRCULAR,PERFECT_EXT,UNAMBIGUOUS_BP
22	41131387	41137790	5circ_002350	7	+	3	7	40	40	T01	7	0	0	1	GTAG	NA	ANCHOR_UNIQUE,CANONICAL,CIRCULAR,PERFECT_EXT,UNAMBIGUOUS_BP
9	91098421	91102666	5circ_002351	2	-	2	2	40	40	T01	2	1	0	1	GTAG	NA	ANCHOR_UNIQUE,CANONICAL,CIRCULAR,GOOD_EXT,UNAMBIGUOUS_BP
9	376209	379935	5circ_002352	6	+	3	6	40	40	T01	6	0	0	1	GTAG	NA	ANCHOR_UNIQUE,CANONICAL,CIRCULAR,PERFECT_EXT,UNAMBIGUOUS_BP
14	52470036	52511390	5circ_002353	3	-	1	3	5	5	T01	3	0	0	1	GTAG	NA	ANCHOR_UNIQUE,CANONICAL,CIRCULAR,PERFECT_EXT,UNAMBIGUOUS_BP
6	98899267	98905670	5circ_002354	12	-	7	12	40	40	T01	12	0	0	1	GTAG	NA	ANCHOR_UNIQUE,CANONICAL,CIRCULAR,PERFECT_EXT,UNAMBIGUOUS_BP
12	26953548	26957743	5circ_002355	2	+	2	2	40	40	T01	2	0	0	1	GTAG	NA	ANCHOR_UNIQUE,CANONICAL,CIRCULAR,PERFECT_EXT,UNAMBIGUOUS_BP
2	44209209	44218537	5circ_002357	2	+	1	2	40	5	T01	2	0	0	1	GTAG	NA	ANCHOR_UNIQUE,CANONICAL,CIRCULAR,PERFECT_EXT,UNAMBIGUOUS_BP
X	135545422	135552146	5circ_002358	15	+	8	15	40	40	T01	15	0	0	1	GTAG	NA	ANCHOR_UNIQUE,CANONICAL,CIRCULAR,PERFECT_EXT,UNAMBIGUOUS_BP
8	38913453	38914243	5circ_002359	15	-	5	14	40	40	T01	15	1	0	1	GTAG	NA	ANCHOR_UNIQUE,CANONICAL,CIRCULAR,GOOD_EXT,UNAMBIGUOUS_BP
4	53145332	53145582	5circ_002360	3	-	1	3	5	40	T01	3	0	0	1	GTAG	NA	ANCHOR_UNIQUE,CANONICAL,CIRCULAR,PERFECT_EXT,UNAMBIGUOUS_BP
4	53414614	53428190	5circ_002361	6	+	2	6	40	5	T01	6	0	0	1	GTAG	NA	ANCHOR_UNIQUE,CANONICAL,CIRCULAR,PERFECT_EXT,UNAMBIGUOUS_BP
21	34834409	34859578	5circ_002362	14	-	9	10	40	40	T01	14	0	0	1	GTAG	NA	ANCHOR_UNIQUE,CANONICAL,CIRCULAR,PERFECT_EXT,UNAMBIGUOUS_BP
2	190659157	190673152	5circ_002363	6	+	5	4	5	40	T01	6	0	0	1	GTAG	NA	ANCHOR_UNIQUE,CANONICAL,CIRCULAR,PERFECT_EXT,UNAMBIGUOUS_BP
12	10627640	10637196	5circ_002364	10	-	5	10	40	40	T01	10	0	0	1	GTAG	NA	ANCHOR_UNIQUE,CANONICAL,CIRCULAR,PERFECT_EXT,UNAMBIGUOUS_BP
11	19142977	19155929	5circ_002366	4	+	1	4	5	5	T01	4	0	0	1	GTAG	NA	ANCHOR_UNIQUE,CANONICAL,CIRCULAR,PERFECT_EXT,UNAMBIGUOUS_BP
22	29970975	29979052	5circ_002367	2	+	2	2	40	40	T01	2	0	0	1	GTAG	NA	ANCHOR_UNIQUE,CANONICAL,CIRCULAR,PERFECT_EXT,UNAMBIGUOUS_BP
21	43998253	43998544	5circ_002368	6	-	2	5	40	5	T01	6	0	0	1	GTAG	NA	ANCHOR_UNIQUE,CANONICAL,CIRCULAR,PERFECT_EXT,UNAMBIGUOUS_BP
1	16644920	16646305	5circ_002369	2	-	2	1	5	5	T01	2	1	0	1	GTAG	NA	ANCHOR_UNIQUE,CANONICAL,CIRCULAR,GOOD_EXT,UNAMBIGUOUS_BP
14	35007282	35013902	5circ_002370	3	+	1	3	40	5	T01	3	0	0	1	GTAG	NA	ANCHOR_UNIQUE,CANONICAL,CIRCULAR,PERFECT_EXT,UNAMBIGUOUS_BP
11	66816052	66822674	5circ_002372	2	+	2	2	35	35	T01	2	0	0	1	GTAG	NA	ANCHOR_UNIQUE,CANONICAL,CIRCULAR,PERFECT_EXT,UNAMBIGUOUS_BP
1	21751490	21757783	5circ_002377	2	-	1	2	37	40	T01	2	0	0	1	GTAG	NA	ANCHOR_UNIQUE,CANONICAL,CIRCULAR,PERFECT_EXT,UNAMBIGUOUS_BP
4	17804403	17805225	5circ_002378	4	-	2	4	40	5	T01	4	0	0	1	GTAG	NA	ANCHOR_UNIQUE,CANONICAL,CIRCULAR,PERFECT_EXT,UNAMBIGUOUS_BP
6	82214230	82214829	5circ_002380	2	-	2	2	5	40	T01	2	0	0	1	GTAG	NA	ANCHOR_UNIQUE,CANONICAL,CIRCULAR,PERFECT_EXT,UNAMBIGUOUS_BP
3	17659766	17733656	5circ_002381	3	-	1	3	5	5	T01	3	0	0	1	GTAG	NA	ANCHOR_UNIQUE,CANONICAL,CIRCULAR,PERFECT_EXT,UNAMBIGUOUS_BP
16	71954104	71982235	5circ_002383	2	-	1	2	5	5	T01	2	0	0	1	GTAG	NA	ANCHOR_UNIQUE,CANONICAL,CIRCULAR,PERFECT_EXT,UNAMBIGUOUS_BP
3	100294844	100306543	5circ_002384	4	+	1	4	40	40	T01	4	0	0	1	GTAG	NA	ANCHOR_UNIQUE,CANONICAL,CIRCULAR,PERFECT_EXT,UNAMBIGUOUS_BP
9	127773989	127774467	5circ_002385	2	-	1	2	40	40	T01	2	1	0	1	GTAG	NA	ANCHOR_UNIQUE,CANONICAL,CIRCULAR,GOOD_EXT,UNAMBIGUOUS_BP
1	243304712	243330692	5circ_002386	6	+	2	6	5	5	T01	6	0	0	1	GTAG	NA	ANCHOR_UNIQUE,CANONICAL,CIRCULAR,PERFECT_EXT,UNAMBIGUOUS_BP
12	50094436	50096972	5circ_002387	2	+	2	2	5	5	T01	2	0	0	1	GTAG	NA	ANCHOR_UNIQUE,CANONICAL,CIRCULAR,PERFECT_EXT,UNAMBIGUOUS_BP
X	107088435	107088839	5circ_002389	34	-	17	34	40	40	T01	34	0	0	1	GTAG	NA	ANCHOR_UNIQUE,CANONICAL,CIRCULAR,PERFECT_EXT,UNAMBIGUOUS_BP
1	51402434	51448135	5circ_002390	5	-	1	5	40	5	T01	5	0	0	1	GTAG	NA	ANCHOR_UNIQUE,CANONICAL,CIRCULAR,PERFECT_EXT,UNAMBIGUOUS_BP
15	89268398	89276891	5circ_002391	4	+	2	4	40	5	T01	4	0	0	1	GTAG	NA	ANCHOR_UNIQUE,CANONICAL,CIRCULAR,PERFECT_EXT,UNAMBIGUOUS_BP
15	84680712	84691644	5circ_002392	3	-	1	3	40	40	T01	3	0	0	1	GTAG	NA	ANCHOR_UNIQUE,CANONICAL,CIRCULAR,PERFECT_EXT,UNAMBIGUOUS_BP
14	103487378	103487707	5circ_002397	2	+	1	2	40	5	T01	2	0	1	1	GTAG	NA	ANCHOR_UNIQUE,CANONICAL,CIRCULAR,GOOD_EXT,UNAMBIGUOUS_BP
5	55960401	55964312	5circ_002399	2	-	1	2	40	40	T01	2	0	0	1	GTAG	NA	ANCHOR_UNIQUE,CANONICAL,CIRCULAR,PERFECT_EXT,UNAMBIGUOUS_BP
1	20767583	20773610	5circ_002400	2	-	2	2	40	5	T01	2	0	0	1	GTAG	NA	ANCHOR_UNIQUE,CANONICAL,CIRCULAR,PERFECT_EXT,UNAMBIGUOUS_BP
22	29970975	29998857	5circ_002401	3	+	2	3	40	40	T01	3	0	0	1	GTAG	NA	ANCHOR_UNIQUE,CANONICAL,CIRCULAR,PERFECT_EXT,UNAMBIGUOUS_BP
3	172112451	172133546	5circ_002402	4	+	2	4	40	5	T01	4	0	0	1	GTAG	NA	ANCHOR_UNIQUE,CANONICAL,CIRCULAR,PERFECT_EXT,UNAMBIGUOUS_BP
8	140585118	140616346	5circ_002403	3	-	3	3	40	40	T01	3	0	0	1	GTAG	NA	ANCHOR_UNIQUE,CANONICAL,CIRCULAR,PERFECT_EXT,UNAMBIGUOUS_BP
2	37000585	37007304	5circ_002405	3	-	1	3	40	5	T01	3	0	0	1	GTAG	NA	ANCHOR_UNIQUE,CANONICAL,CIRCULAR,PERFECT_EXT,UNAMBIGUOUS_BP
9	127885185	127887591	5circ_002406	3	-	1	3	40	40	T01	3	0	0	1	GTAG	NA	ANCHOR_UNIQUE,CANONICAL,CIRCULAR,PERFECT_EXT,UNAMBIGUOUS_BP
1	158680582	158685347	5circ_002407	10	-	7	9	40	40	T01	10	0	0	1	GTAG	NA	ANCHOR_UNIQUE,CANONICAL,CIRCULAR,PERFECT_EXT,UNAMBIGUOUS_BP
18	10534465	10550254	5circ_002408	6	+	1	6	40	40	T01	6	0	0	1	GTAG	NA	ANCHOR_UNIQUE,CANONICAL,CIRCULAR,PERFECT_EXT,UNAMBIGUOUS_BP
3	112928815	112931171	5circ_002409	5	-	1	5	40	40	T01	5	0	0	1	GTAG	NA	ANCHOR_UNIQUE,CANONICAL,CIRCULAR,PERFECT_EXT,UNAMBIGUOUS_BP
1	11090553	11091597	5circ_002411	5	-	5	5	40	40	T01	5	0	0	1	GTAG	NA	ANCHOR_UNIQUE,CANONICAL,CIRCULAR,PERFECT_EXT,UNAMBIGUOUS_BP
11	14867505	14869630	5circ_002414	2	+	1	2	40	40	T01	2	0	0	1	GTAG	NA	ANCHOR_UNIQUE,CANONICAL,CIRCULAR,PERFECT_EXT,UNAMBIGUOUS_BP
1	20775723	20776005	5circ_002415	13	-	6	2	5	40	T01	13	0	0	1	GTAG	NA	ANCHOR_UNIQUE,CANONICAL,CIRCULAR,PERFECT_EXT,UNAMBIGUOUS_BP
1	180078462	180080661	5circ_002416	4	+	2	4	40	40	T01	4	0	0	1	GTAG	NA	ANCHOR_UNIQUE,CANONICAL,CIRCULAR,PERFECT_EXT,UNAMBIGUOUS_BP
12	112229697	112231715	5circ_002417	20	-	12	19	40	40	T01	20	0	0	1	GTAG	NA	ANCHOR_UNIQUE,CANONICAL,CIRCULAR,PERFECT_EXT,UNAMBIGUOUS_BP
11	86010984	86068738	5circ_002419	4	-	2	4	40	5	T01	4	0	0	1	GTAG	NA	ANCHOR_UNIQUE,CANONICAL,CIRCULAR,PERFECT_EXT,UNAMBIGUOUS_BP
6	17637152	17646154	5circ_002420	4	-	1	4	40	5	T01	4	0	0	1	GTAG	NA	ANCHOR_UNIQUE,CANONICAL,CIRCULAR,PERFECT_EXT,UNAMBIGUOUS_BP
12	51073822	51076647	5circ_002421	2	-	1	2	40	40	T01	2	0	0	1	GTAG	NA	ANCHOR_UNIQUE,CANONICAL,CIRCULAR,PERFECT_EXT,UNAMBIGUOUS_BP
15	49235850	49308777	5circ_002422	2	+	1	2	5	5	T01	2	0	0	1	GTAG	NA	ANCHOR_UNIQUE,CANONICAL,CIRCULAR,PERFECT_EXT,UNAMBIGUOUS_BP
6	42781838	42830172	5circ_002423	4	+	1	4	40	5	T01	4	0	0	1	GTAG	NA	ANCHOR_UNIQUE,CANONICAL,CIRCULAR,PERFECT_EXT,UNAMBIGUOUS_BP
2	61501995	61502310	5circ_002426	4	-	2	4	40	5	T01	4	0	0	1	GTAG	NA	ANCHOR_UNIQUE,CANONICAL,CIRCULAR,PERFECT_EXT,UNAMBIGUOUS_BP
1	224400949	224431581	5circ_002427	2	-	1	2	5	40	T01	2	0	0	1	GTAG	NA	ANCHOR_UNIQUE,CANONICAL,CIRCULAR,PERFECT_EXT,UNAMBIGUOUS_BP
11	46512564	46512813	5circ_002429	6	-	2	6	40	40	T01	6	0	0	1	GTAG	NA	ANCHOR_UNIQUE,CANONICAL,CIRCULAR,PERFECT_EXT,UNAMBIGUOUS_BP
4	56600933	56604222	5circ_002431	2	+	1	2	40	40	T01	2	0	0	1	GTAG	NA	ANCHOR_UNIQUE,CANONICAL,CIRCULAR,PERFECT_EXT,UNAMBIGUOUS_BP
9	92067965	92080963	5circ_002432	4	-	1	4	40	40	T01	4	0	0	1	GTAG	NA	ANCHOR_UNIQUE,CANONICAL,CIRCULAR,PERFECT_EXT,UNAMBIGUOUS_BP
6	79654494	79673799	5circ_002433	4	+	3	4	40	40	T01	4	0	0	1	GTAG	NA	ANCHOR_UNIQUE,CANONICAL,CIRCULAR,PERFECT_EXT,UNAMBIGUOUS_BP
18	76919775	76920058	5circ_002435	6	+	2	6	40	40	T01	6	0	0	1	GTAG	NA	ANCHOR_UNIQUE,CANONICAL,CIRCULAR,PERFECT_EXT,UNAMBIGUOUS_BP
3	196073929	196077122	5circ_002436	2	-	1	2	5	35	T01	2	0	0	1	GTAG	NA	ANCHOR_UNIQUE,CANONICAL,CIRCULAR,PERFECT_EXT,UNAMBIGUOUS_BP
2	218466009	218482234	5circ_002437	10	-	4	10	40	40	T01	10	0	0	1	GTAG	NA	ANCHOR_UNIQUE,CANONICAL,CIRCULAR,PERFECT_EXT,UNAMBIGUOUS_BP
19	6826611	6829918	5circ_002438	3	+	2	3	5	5	T01	3	0	0	1	GTAG	NA	ANCHOR_UNIQUE,CANONICAL,CIRCULAR,PERFECT_EXT,UNAMBIGUOUS_BP
2	197121331	197122792	5circ_002439	3	-	1	3	5	40	T01	3	0	0	1	GTAG	NA	ANCHOR_UNIQUE,CANONICAL,CIRCULAR,PERFECT_EXT,UNAMBIGUOUS_BP
8	41719660	41725946	5circ_002441	3	-	1	3	40	40	T01	3	0	0	1	GTAG	NA	ANCHOR_UNIQUE,CANONICAL,CIRCULAR,PERFECT_EXT,UNAMBIGUOUS_BP
11	70354300	70356254	5circ_002442	5	+	3	5	40	40	T01	5	0	0	1	GTAG	NA	ANCHOR_UNIQUE,CANONICAL,CIRCULAR,PERFECT_EXT,UNAMBIGUOUS_BP
3	94082049	94095154	5circ_002443	4	+	2	4	40	40	T01	4	0	0	1	GTAG	NA	ANCHOR_UNIQUE,CANONICAL,CIRCULAR,PERFECT_EXT,UNAMBIGUOUS_BP
11	93721311	93728821	5circ_002444	6	+	2	6	5	40	T01	6	0	0	1	GTAG	NA	ANCHOR_UNIQUE,CANONICAL,CIRCULAR,PERFECT_EXT,UNAMBIGUOUS_BP
1	173946475	173952138	5circ_002445	8	-	2	8	40	40	T01	8	0	0	1	GTAG	NA	ANCHOR_UNIQUE,CANONICAL,CIRCULAR,PERFECT_EXT,UNAMBIGUOUS_BP
2	26373366	26375148	5circ_002446	3	+	1	3	5	5	T01	3	0	0	1	GTAG	NA	ANCHOR_UNIQUE,CANONICAL,CIRCULAR,PERFECT_EXT,UNAMBIGUOUS_BP
2	159729008	159762993	5circ_002447	4	+	1	4	40	40	T01	4	0	0	1	GTAG	NA	ANCHOR_UNIQUE,CANONICAL,CIRCULAR,PERFECT_EXT,UNAMBIGUOUS_BP
17	43049120	43050190	5circ_002448	2	-	2	1	5	5	T01	2	0	0	1	GTAG	NA	ANCHOR_UNIQUE,CANONICAL,CIRCULAR,PERFECT_EXT,UNAMBIGUOUS_BP
9	128826021	128826629	5circ_002449	3	-	3	3	40	40	T01	3	1	0	1	GTAG	NA	ANCHOR_UNIQUE,CANONICAL,CIRCULAR,GOOD_EXT,UNAMBIGUOUS_BP
9	109050282	109064567	5circ_002455	29	-	14	29	40	40	T01	29	0	0	1	GTAG	NA	ANCHOR_UNIQUE,CANONICAL,CIRCULAR,PERFECT_EXT,UNAMBIGUOUS_BP
8	134812609	134813169	5circ_002456	4	-	2	3	40	5	T01	4	0	0	1	GTAG	NA	ANCHOR_UNIQUE,CANONICAL,CIRCULAR,PERFECT_EXT,UNAMBIGUOUS_BP
2	33252676	33275923	5circ_002457	6	+	3	6	40	40	T01	6	0	0	1	GTAG	NA	ANCHOR_UNIQUE,CANONICAL,CIRCULAR,PERFECT_EXT,UNAMBIGUOUS_BP
X	53561755	53569827	5circ_002458	4	-	2	4	5	37	T01	4	0	0	1	GTAG	NA	ANCHOR_UNIQUE,CANONICAL,CIRCULAR,PERFECT_EXT,UNAMBIGUOUS_BP
11	128768117	128782023	5circ_002459	4	+	1	4	40	40	T01	4	1	0	1	GTAG	NA	ANCHOR_UNIQUE,CANONICAL,CIRCULAR,GOOD_EXT,UNAMBIGUOUS_BP
5	179709872	179716294	5circ_002460	12	+	8	12	40	40	T01	12	0	0	1	GTAG	NA	ANCHOR_UNIQUE,CANONICAL,CIRCULAR,PERFECT_EXT,UNAMBIGUOUS_BP
12	47216221	47216689	5circ_002463	4	+	3	4	40	40	T01	4	0	0	1	GTAG	NA	ANCHOR_UNIQUE,CANONICAL,CIRCULAR,PERFECT_EXT,UNAMBIGUOUS_BP
1	41070594	41075451	5circ_002465	234	-	75	229	40	40	T01	234	0	0	1	GTAG	NA	ANCHOR_UNIQUE,CANONICAL,CIRCULAR,PERFECT_EXT,UNAMBIGUOUS_BP
17	28682726	28683816	5circ_002466	4	+	3	4	40	40	T01	4	0	0	1	GTAG	NA	ANCHOR_UNIQUE,CANONICAL,CIRCULAR,PERFECT_EXT,UNAMBIGUOUS_BP
12	100282942	100298175	5circ_002467	54	+	30	23	35	40	T01	54	0	0	1	GTAG	NA	ANCHOR_UNIQUE,CANONICAL,CIRCULAR,PERFECT_EXT,UNAMBIGUOUS_BP
1	61404103	61426556	5circ_002468	3	+	1	3	40	40	T01	3	0	0	1	GTAG	NA	ANCHOR_UNIQUE,CANONICAL,CIRCULAR,PERFECT_EXT,UNAMBIGUOUS_BP
4	48570826	48576222	5circ_002469	4	-	2	4	40	40	T01	4	0	0	1	GTAG	NA	ANCHOR_UNIQUE,CANONICAL,CIRCULAR,PERFECT_EXT,UNAMBIGUOUS_BP
3	15411244	15415942	5circ_002470	16	-	8	16	40	40	T01	16	0	0	1	GTAG	NA	ANCHOR_UNIQUE,CANONICAL,CIRCULAR,PERFECT_EXT,UNAMBIGUOUS_BP
13	77015408	77021861	5circ_002472	8	-	6	8	40	40	T01	8	0	0	1	GTAG	NA	ANCHOR_UNIQUE,CANONICAL,CIRCULAR,PERFECT_EXT,UNAMBIGUOUS_BP
12	122135223	122135666	5circ_002473	3	+	1	3	40	5	T01	3	0	0	1	GTAG	NA	ANCHOR_UNIQUE,CANONICAL,CIRCULAR,PERFECT_EXT,UNAMBIGUOUS_BP
6	136694139	136698682	5circ_002474	13	-	8	12	40	40	T01	13	0	0	1	GTAG	NA	ANCHOR_UNIQUE,CANONICAL,CIRCULAR,PERFECT_EXT,UNAMBIGUOUS_BP
16	23442476	23445961	5circ_002476	5	-	1	5	5	40	T01	5	0	0	1	GTAG	NA	ANCHOR_UNIQUE,CANONICAL,CIRCULAR,PERFECT_EXT,UNAMBIGUOUS_BP
1	24169416	24180854	5circ_002477	16	-	4	16	40	5	T01	16	0	0	1	GTAG	NA	ANCHOR_UNIQUE,CANONICAL,CIRCULAR,PERFECT_EXT,UNAMBIGUOUS_BP
2	86098610	86100172	5circ_002478	2	-	1	2	40	40	T01	2	0	0	1	GTAG	NA	ANCHOR_UNIQUE,CANONICAL,CIRCULAR,PERFECT_EXT,UNAMBIGUOUS_BP
4	25333182	25333988	5circ_002480	5	+	2	5	40	40	T01	5	0	0	1	GTAG	NA	ANCHOR_UNIQUE,CANONICAL,CIRCULAR,PERFECT_EXT,UNAMBIGUOUS_BP
20	45902266	45902604	5circ_002481	3	-	1	3	36	40	T01	3	0	1	1	GTAG	NA	ANCHOR_UNIQUE,CANONICAL,CIRCULAR,GOOD_EXT,UNAMBIGUOUS_BP
7	37700373	37709799	5circ_002482	2	+	1	2	40	5	T01	2	0	0	1	GTAG	NA	ANCHOR_UNIQUE,CANONICAL,CIRCULAR,PERFECT_EXT,UNAMBIGUOUS_BP
17	81237386	81237702	5circ_002483	3	-	2	3	40	40	T01	3	0	0	1	GTAG	NA	ANCHOR_UNIQUE,CANONICAL,CIRCULAR,PERFECT_EXT,UNAMBIGUOUS_BP
1	29097806	29115803	5circ_002486	3	+	1	3	5	40	T01	3	0	0	1	GTAG	NA	ANCHOR_UNIQUE,CANONICAL,CIRCULAR,PERFECT_EXT,UNAMBIGUOUS_BP
5	876100	889766	5circ_002488	5	-	1	5	40	5	T01	5	0	0	1	GTAG	NA	ANCHOR_UNIQUE,CANONICAL,CIRCULAR,PERFECT_EXT,UNAMBIGUOUS_BP
6	18185771	18191381	5circ_002489	3	+	1	3	5	40	T01	3	0	0	1	GTAG	NA	ANCHOR_UNIQUE,CANONICAL,CIRCULAR,PERFECT_EXT,UNAMBIGUOUS_BP
3	101681240	101682428	5circ_002490	3	-	1	3	5	40	T01	3	0	0	1	GTAG	NA	ANCHOR_UNIQUE,CANONICAL,CIRCULAR,PERFECT_EXT,UNAMBIGUOUS_BP
5	157488264	157490454	5circ_002491	2	-	1	2	5	5	T01	2	1	0	1	GTAG	NA	ANCHOR_UNIQUE,CANONICAL,CIRCULAR,GOOD_EXT,UNAMBIGUOUS_BP
5	91237756	91238712	5circ_002492	8	-	4	8	40	36	T01	8	1	0	1	GTAG	NA	ANCHOR_UNIQUE,CANONICAL,CIRCULAR,GOOD_EXT,UNAMBIGUOUS_BP
10	102375358	102377128	5circ_002494	4	+	2	4	40	40	T01	4	0	0	1	GTAG	NA	ANCHOR_UNIQUE,CANONICAL,CIRCULAR,PERFECT_EXT,UNAMBIGUOUS_BP
19	49828448	49829090	5circ_002495	15	+	8	15	40	40	T01	15	0	0	1	GTAG	NA	ANCHOR_UNIQUE,CANONICAL,CIRCULAR,PERFECT_EXT,UNAMBIGUOUS_BP
11	134184636	134185526	5circ_002496	4	-	2	4	5	5	T01	4	1	0	1	GTAG	NA	ANCHOR_UNIQUE,CANONICAL,CIRCULAR,GOOD_EXT,UNAMBIGUOUS_BP
X	41183997	41189475	5circ_002497	3	+	1	3	35	40	T01	3	0	0	1	GTAG	NA	ANCHOR_UNIQUE,CANONICAL,CIRCULAR,PERFECT_EXT,UNAMBIGUOUS_BP
4	146305925	146308975	5circ_002498	6	-	3	6	40	40	T01	6	0	0	1	GTAG	NA	ANCHOR_UNIQUE,CANONICAL,CIRCULAR,PERFECT_EXT,UNAMBIGUOUS_BP
9	5021962	5055788	5circ_002499	5	+	4	5	40	40	T01	5	0	0	1	GTAG	NA	ANCHOR_UNIQUE,CANONICAL,CIRCULAR,PERFECT_EXT,UNAMBIGUOUS_BP
15	92885514	92901299	5circ_002500	4	+	2	4	5	40	T01	4	0	0	1	GTAG	NA	ANCHOR_UNIQUE,CANONICAL,CIRCULAR,PERFECT_EXT,UNAMBIGUOUS_BP
X	96912327	96965207	5circ_002501	2	+	1	2	5	5	T01	2	0	0	1	GTAG	NA	ANCHOR_UNIQUE,CANONICAL,CIRCULAR,PERFECT_EXT,UNAMBIGUOUS_BP
16	69235747	69260260	5circ_002502	4	+	1	4	40	40	T01	4	0	0	1	GTAG	NA	ANCHOR_UNIQUE,CANONICAL,CIRCULAR,PERFECT_EXT,UNAMBIGUOUS_BP
2	201330469	201351451	5circ_002503	3	-	2	3	40	40	T01	3	0	0	1	GTAG	NA	ANCHOR_UNIQUE,CANONICAL,CIRCULAR,PERFECT_EXT,UNAMBIGUOUS_BP
12	28305648	28307749	5circ_002504	3	+	3	3	40	5	T01	3	0	0	1	GTAG	NA	ANCHOR_UNIQUE,CANONICAL,CIRCULAR,PERFECT_EXT,UNAMBIGUOUS_BP
15	90885036	90885585	5circ_002505	2	+	1	2	5	40	T01	2	1	0	1	GTAG	NA	ANCHOR_UNIQUE,CANONICAL,CIRCULAR,GOOD_EXT,UNAMBIGUOUS_BP
4	169477123	169508852	5circ_002506	6	-	2	6	5	40	T01	6	0	0	1	GTAG	NA	ANCHOR_UNIQUE,CANONICAL,CIRCULAR,PERFECT_EXT,UNAMBIGUOUS_BP
2	241252956	241256806	5circ_002507	6	-	2	6	40	37	T01	6	0	0	1	GTAG	NA	ANCHOR_UNIQUE,CANONICAL,CIRCULAR,PERFECT_EXT,UNAMBIGUOUS_BP
17	44257349	44258623	5circ_002508	3	-	3	3	40	40	T01	3	0	0	1	GTAG	NA	ANCHOR_UNIQUE,CANONICAL,CIRCULAR,PERFECT_EXT,UNAMBIGUOUS_BP
17	18865468	18877870	5circ_002509	3	+	2	3	40	40	T01	3	0	0	1	GTAG	NA	ANCHOR_UNIQUE,CANONICAL,CIRCULAR,PERFECT_EXT,UNAMBIGUOUS_BP
11	3685972	3693375	5circ_002510	4	-	1	4	5	40	T01	4	0	0	1	GTAG	NA	ANCHOR_UNIQUE,CANONICAL,CIRCULAR,PERFECT_EXT,UNAMBIGUOUS_BP
2	128172572	128183789	5circ_002511	2	+	2	2	40	5	T01	2	0	0	1	GTAG	NA	ANCHOR_UNIQUE,CANONICAL,CIRCULAR,PERFECT_EXT,UNAMBIGUOUS_BP
12	112239051	112252528	5circ_002512	4	-	2	4	40	35	T01	4	0	0	1	GTAG	NA	ANCHOR_UNIQUE,CANONICAL,CIRCULAR,PERFECT_EXT,UNAMBIGUOUS_BP
8	140580904	140605914	5circ_002513	2	-	2	2	40	40	T01	2	0	0	1	GTAG	NA	ANCHOR_UNIQUE,CANONICAL,CIRCULAR,PERFECT_EXT,UNAMBIGUOUS_BP
7	44674410	44675268	5circ_002515	4	+	3	4	40	40	T01	4	0	0	1	GTAG	NA	ANCHOR_UNIQUE,CANONICAL,CIRCULAR,PERFECT_EXT,UNAMBIGUOUS_BP
2	148483109	148502509	5circ_002517	12	+	2	6	5	40	T01	12	0	0	1	GTAG	NA	ANCHOR_UNIQUE,CANONICAL,CIRCULAR,PERFECT_EXT,UNAMBIGUOUS_BP
4	3142765	3154419	5circ_002519	2	+	1	2	40	40	T01	2	0	0	1	GTAG	NA	ANCHOR_UNIQUE,CANONICAL,CIRCULAR,PERFECT_EXT,UNAMBIGUOUS_BP
14	102194937	102197847	5circ_002520	6	+	3	6	40	40	T01	6	0	0	1	GTAG	NA	ANCHOR_UNIQUE,CANONICAL,CIRCULAR,PERFECT_EXT,UNAMBIGUOUS_BP
12	64720069	64720242	5circ_002521	2	-	1	2	35	5	T01	2	2	0	1	GTAG	NA	ANCHOR_UNIQUE,CANONICAL,CIRCULAR,OK_EXT,UNAMBIGUOUS_BP
3	71041327	71112637	5circ_002522	11	-	3	10	40	40	T01	11	0	0	1	GTAG	NA	ANCHOR_UNIQUE,CANONICAL,CIRCULAR,PERFECT_EXT,UNAMBIGUOUS_BP
1	30964673	30981405	5circ_002523	2	-	2	2	5	40	T01	2	0	0	1	GTAG	NA	ANCHOR_UNIQUE,CANONICAL,CIRCULAR,PERFECT_EXT,UNAMBIGUOUS_BP
6	149771161	149790058	5circ_002524	2	+	1	2	5	5	T01	2	0	0	1	GTAG	NA	ANCHOR_UNIQUE,CANONICAL,CIRCULAR,PERFECT_EXT,UNAMBIGUOUS_BP
14	81203899	81204104	5circ_002526	2	-	1	2	40	5	T01	2	0	0	1	GTAG	NA	ANCHOR_UNIQUE,CANONICAL,CIRCULAR,PERFECT_EXT,UNAMBIGUOUS_BP
14	102047816	102050198	5circ_002527	2	+	1	2	40	40	T01	2	0	0	1	GTAG	NA	ANCHOR_UNIQUE,CANONICAL,CIRCULAR,PERFECT_EXT,UNAMBIGUOUS_BP
1	150444250	150460317	5circ_002529	6	+	2	6	40	40	T01	6	0	0	1	GTAG	NA	ANCHOR_UNIQUE,CANONICAL,CIRCULAR,PERFECT_EXT,UNAMBIGUOUS_BP
17	34990962	34996195	5circ_002530	4	+	2	4	40	40	T01	4	0	0	1	GTAG	NA	ANCHOR_UNIQUE,CANONICAL,CIRCULAR,PERFECT_EXT,UNAMBIGUOUS_BP
19	46788053	46788276	5circ_002531	6	+	1	6	5	40	T01	6	2	0	1	GTAG	NA	ANCHOR_UNIQUE,CANONICAL,CIRCULAR,OK_EXT,UNAMBIGUOUS_BP
1	100196213	100206636	5circ_002532	2	-	2	2	5	40	T01	2	0	0	1	GTAG	NA	ANCHOR_UNIQUE,CANONICAL,CIRCULAR,PERFECT_EXT,UNAMBIGUOUS_BP
14	92555750	92577477	5circ_002533	10	+	4	7	40	40	T01	10	0	0	1	GTAG	NA	ANCHOR_UNIQUE,CANONICAL,CIRCULAR,PERFECT_EXT,UNAMBIGUOUS_BP
22	29356425	29356817	5circ_002535	3	-	2	3	5	5	T01	3	0	0	1	GTAG	NA	ANCHOR_UNIQUE,CANONICAL,CIRCULAR,PERFECT_EXT,UNAMBIGUOUS_BP
6	3283851	3287091	5circ_002536	6	-	6	6	40	40	T01	6	0	0	1	GTAG	NA	ANCHOR_UNIQUE,CANONICAL,CIRCULAR,PERFECT_EXT,UNAMBIGUOUS_BP
4	152469940	152482673	5circ_002537	5	-	2	5	5	5	T01	5	0	0	1	GTAG	NA	ANCHOR_UNIQUE,CANONICAL,CIRCULAR,PERFECT_EXT,UNAMBIGUOUS_BP
3	70987993	71053773	5circ_002538	3	-	2	3	40	40	T01	3	0	0	1	GTAG	NA	ANCHOR_UNIQUE,CANONICAL,CIRCULAR,PERFECT_EXT,UNAMBIGUOUS_BP
1	93183977	93193744	5circ_002539	4	+	2	4	5	40	T01	4	0	0	1	GTAG	NA	ANCHOR_UNIQUE,CANONICAL,CIRCULAR,PERFECT_EXT,UNAMBIGUOUS_BP
14	100342397	100346846	5circ_002540	3	-	1	3	5	35	T01	3	0	0	1	GTAG	NA	ANCHOR_UNIQUE,CANONICAL,CIRCULAR,PERFECT_EXT,UNAMBIGUOUS_BP
4	48586620	48594016	5circ_002541	3	-	1	3	40	5	T01	3	0	0	1	GTAG	NA	ANCHOR_UNIQUE,CANONICAL,CIRCULAR,PERFECT_EXT,UNAMBIGUOUS_BP
5	102436325	102436543	5circ_002542	3	-	2	3	40	40	T01	3	2	0	1	GTAG	NA	ANCHOR_UNIQUE,CANONICAL,CIRCULAR,OK_EXT,UNAMBIGUOUS_BP
8	120693691	120693908	5circ_002543	9	-	4	9	40	40	T01	9	0	0	1	GTAG	NA	ANCHOR_UNIQUE,CANONICAL,CIRCULAR,PERFECT_EXT,UNAMBIGUOUS_BP
12	1777853	1781076	5circ_002544	2	+	2	1	40	40	T01	2	0	0	1	GTAG	NA	ANCHOR_UNIQUE,CANONICAL,CIRCULAR,PERFECT_EXT,UNAMBIGUOUS_BP
12	117046558	117049158	5circ_002545	11	-	3	11	40	40	T01	11	0	0	1	GTAG	NA	ANCHOR_UNIQUE,CANONICAL,CIRCULAR,PERFECT_EXT,UNAMBIGUOUS_BP
18	13048858	13059312	5circ_002546	4	+	3	4	40	40	T01	4	0	0	1	GTAG	NA	ANCHOR_UNIQUE,CANONICAL,CIRCULAR,PERFECT_EXT,UNAMBIGUOUS_BP
8	98636141	98640436	5circ_002547	2	-	1	2	5	40	T01	2	0	0	1	GTAG	NA	ANCHOR_UNIQUE,CANONICAL,CIRCULAR,PERFECT_EXT,UNAMBIGUOUS_BP
16	3640714	3643036	5circ_002550	8	+	3	8	40	40	T01	8	0	0	1	GTAG	NA	ANCHOR_UNIQUE,CANONICAL,CIRCULAR,PERFECT_EXT,UNAMBIGUOUS_BP
6	170388286	170395579	5circ_002551	16	+	6	14	40	40	T01	16	0	0	1	GTAG	NA	ANCHOR_UNIQUE,CANONICAL,CIRCULAR,PERFECT_EXT,UNAMBIGUOUS_BP
1	1795988	1796552	5circ_002553	2	-	2	2	40	5	T01	2	1	0	1	GTAG	NA	ANCHOR_UNIQUE,CANONICAL,CIRCULAR,GOOD_EXT,UNAMBIGUOUS_BP
1	16305802	16315435	5circ_002555	3	-	1	3	40	5	T01	3	1	0	1	GTAG	NA	ANCHOR_UNIQUE,CANONICAL,CIRCULAR,GOOD_EXT,UNAMBIGUOUS_BP
14	45011974	45044870	5circ_002557	3	+	1	3	40	5	T01	3	0	0	1	GTAG	NA	ANCHOR_UNIQUE,CANONICAL,CIRCULAR,PERFECT_EXT,UNAMBIGUOUS_BP
4	48684672	48710698	5circ_002558	36	-	13	35	40	40	T01	36	0	0	1	GTAG	NA	ANCHOR_UNIQUE,CANONICAL,CIRCULAR,PERFECT_EXT,UNAMBIGUOUS_BP
5	32414968	32420103	5circ_002559	15	-	5	12	40	40	T01	15	0	0	1	GTAG	NA	ANCHOR_UNIQUE,CANONICAL,CIRCULAR,PERFECT_EXT,UNAMBIGUOUS_BP
16	30713207	30713711	5circ_002560	21	+	9	21	40	40	T01	21	0	0	1	GTAG	NA	ANCHOR_UNIQUE,CANONICAL,CIRCULAR,PERFECT_EXT,UNAMBIGUOUS_BP
1	156320838	156323308	5circ_002561	5	-	2	4	40	5	T01	5	0	0	1	GTAG	NA	ANCHOR_UNIQUE,CANONICAL,CIRCULAR,PERFECT_EXT,UNAMBIGUOUS_BP
1	197642710	197674169	5circ_002562	2	-	1	2	40	5	T01	2	0	0	1	GTAG	NA	ANCHOR_UNIQUE,CANONICAL,CIRCULAR,PERFECT_EXT,UNAMBIGUOUS_BP
3	52739428	52752336	5circ_002564	3	-	1	3	5	40	T01	3	0	0	1	GTAG	NA	ANCHOR_UNIQUE,CANONICAL,CIRCULAR,PERFECT_EXT,UNAMBIGUOUS_BP
12	62484169	62501698	5circ_002565	6	+	4	6	40	40	T01	6	0	0	1	GTAG	NA	ANCHOR_UNIQUE,CANONICAL,CIRCULAR,PERFECT_EXT,UNAMBIGUOUS_BP
7	130185191	130192823	5circ_002566	6	-	3	6	40	40	T01	6	0	0	1	GTAG	NA	ANCHOR_UNIQUE,CANONICAL,CIRCULAR,PERFECT_EXT,UNAMBIGUOUS_BP
2	8908620	8982144	5circ_002568	2	-	2	2	40	40	T01	2	0	0	1	GTAG	NA	ANCHOR_UNIQUE,CANONICAL,CIRCULAR,PERFECT_EXT,UNAMBIGUOUS_BP
8	41725760	41734069	5circ_002569	4	-	1	4	40	5	T01	4	0	0	1	GTAG	NA	ANCHOR_UNIQUE,CANONICAL,CIRCULAR,PERFECT_EXT,UNAMBIGUOUS_BP
2	33110581	33188851	5circ_002570	5	+	2	3	5	5	T01	5	0	0	1	GTAG	NA	ANCHOR_UNIQUE,CANONICAL,CIRCULAR,PERFECT_EXT,UNAMBIGUOUS_BP
6	18213655	18217885	5circ_002571	2	+	2	2	40	40	T01	2	0	0	1	GTAG	NA	ANCHOR_UNIQUE,CANONICAL,CIRCULAR,PERFECT_EXT,UNAMBIGUOUS_BP
12	130795994	130808704	5circ_002572	2	-	1	2	5	5	T01	2	0	0	1	GTAG	NA	ANCHOR_UNIQUE,CANONICAL,CIRCULAR,PERFECT_EXT,UNAMBIGUOUS_BP
1	51236733	51271473	5circ_002573	8	+	4	5	40	5	T01	8	0	0	1	GTAG	NA	ANCHOR_UNIQUE,CANONICAL,CIRCULAR,PERFECT_EXT,UNAMBIGUOUS_BP
1	150417595	150446401	5circ_002575	10	+	2	10	40	5	T01	10	0	0	1	GTAG	NA	ANCHOR_UNIQUE,CANONICAL,CIRCULAR,PERFECT_EXT,UNAMBIGUOUS_BP
22	44802076	44825593	5circ_002578	6	+	3	6	40	40	T01	6	0	0	1	GTAG	NA	ANCHOR_UNIQUE,CANONICAL,CIRCULAR,PERFECT_EXT,UNAMBIGUOUS_BP
15	65669778	65670188	5circ_002579	19	-	8	15	40	40	T01	19	0	0	1	GTAG	NA	ANCHOR_UNIQUE,CANONICAL,CIRCULAR,PERFECT_EXT,UNAMBIGUOUS_BP
7	93308823	93334197	5circ_002580	7	+	1	7	40	5	T01	7	0	0	1	GTAG	NA	ANCHOR_UNIQUE,CANONICAL,CIRCULAR,PERFECT_EXT,UNAMBIGUOUS_BP
1	161846448	161863312	5circ_002582	10	+	4	10	40	40	T01	10	0	0	1	GTAG	NA	ANCHOR_UNIQUE,CANONICAL,CIRCULAR,PERFECT_EXT,UNAMBIGUOUS_BP
8	70121301	70144848	5circ_002583	2	-	1	2	5	35	T01	2	0	0	1	GTAG	NA	ANCHOR_UNIQUE,CANONICAL,CIRCULAR,PERFECT_EXT,UNAMBIGUOUS_BP
10	7220410	7285954	5circ_002584	2	-	2	2	40	40	T01	2	0	0	1	GTAG	NA	ANCHOR_UNIQUE,CANONICAL,CIRCULAR,PERFECT_EXT,UNAMBIGUOUS_BP
16	15879803	15884205	5circ_002585	2	-	2	2	40	40	T01	2	0	0	1	GTAG	NA	ANCHOR_UNIQUE,CANONICAL,CIRCULAR,PERFECT_EXT,UNAMBIGUOUS_BP
10	86467278	86497301	5circ_002586	3	-	1	3	5	5	T01	3	0	0	1	GTAG	NA	ANCHOR_UNIQUE,CANONICAL,CIRCULAR,PERFECT_EXT,UNAMBIGUOUS_BP
4	56382476	56384341	5circ_002587	3	-	1	3	40	5	T01	3	0	0	1	GTAG	NA	ANCHOR_UNIQUE,CANONICAL,CIRCULAR,PERFECT_EXT,UNAMBIGUOUS_BP
10	1072115	1105267	5circ_002588	4	+	2	4	40	40	T01	4	0	0	1	GTAG	NA	ANCHOR_UNIQUE,CANONICAL,CIRCULAR,PERFECT_EXT,UNAMBIGUOUS_BP
19	17837931	17839663	5circ_002589	7	-	3	7	40	40	T01	7	0	0	1	GTAG	NA	ANCHOR_UNIQUE,CANONICAL,CIRCULAR,PERFECT_EXT,UNAMBIGUOUS_BP
2	38309378	38319019	5circ_002591	12	-	4	12	35	40	T01	12	0	0	1	GTAG	NA	ANCHOR_UNIQUE,CANONICAL,CIRCULAR,PERFECT_EXT,UNAMBIGUOUS_BP
22	38738586	38738988	5circ_002592	8	-	2	8	40	40	T01	8	0	0	1	GTAG	NA	ANCHOR_UNIQUE,CANONICAL,CIRCULAR,PERFECT_EXT,UNAMBIGUOUS_BP
8	102323310	102329399	5circ_002593	6	-	3	6	5	40	T01	6	0	0	1	GTAG	NA	ANCHOR_UNIQUE,CANONICAL,CIRCULAR,PERFECT_EXT,UNAMBIGUOUS_BP
5	14741826	14758598	5circ_002594	37	-	17	37	40	40	T01	37	0	0	1	GTAG	NA	ANCHOR_UNIQUE,CANONICAL,CIRCULAR,PERFECT_EXT,UNAMBIGUOUS_BP
11	16264712	16286210	5circ_002596	3	-	3	2	40	40	T01	3	0	0	1	GTAG	NA	ANCHOR_UNIQUE,CANONICAL,CIRCULAR,PERFECT_EXT,UNAMBIGUOUS_BP
20	47280464	47290274	5circ_002598	3	-	1	3	40	40	T01	3	0	0	1	GTAG	NA	ANCHOR_UNIQUE,CANONICAL,CIRCULAR,PERFECT_EXT,UNAMBIGUOUS_BP
16	24561611	24564865	5circ_002599	2	+	2	2	40	40	T01	2	0	0	1	GTAG	NA	ANCHOR_UNIQUE,CANONICAL,CIRCULAR,PERFECT_EXT,UNAMBIGUOUS_BP
9	6880011	6926735	5circ_002600	5	+	2	5	40	5	T01	5	0	0	1	GTAG	NA	ANCHOR_UNIQUE,CANONICAL,CIRCULAR,PERFECT_EXT,UNAMBIGUOUS_BP
17	75242335	75243570	5circ_002601	12	-	8	12	40	40	T01	12	0	0	1	GTAG	NA	ANCHOR_UNIQUE,CANONICAL,CIRCULAR,PERFECT_EXT,UNAMBIGUOUS_BP
16	20802795	20803670	5circ_002604	4	-	1	4	40	40	T01	4	0	0	1	GTAG	NA	ANCHOR_UNIQUE,CANONICAL,CIRCULAR,PERFECT_EXT,UNAMBIGUOUS_BP
6	131164397	131169273	5circ_002605	6	+	1	6	40	5	T01	6	0	0	1	GTAG	NA	ANCHOR_UNIQUE,CANONICAL,CIRCULAR,PERFECT_EXT,UNAMBIGUOUS_BP
21	33534578	33539356	5circ_002608	4	-	2	4	40	40	T01	4	0	0	1	GTAG	NA	ANCHOR_UNIQUE,CANONICAL,CIRCULAR,PERFECT_EXT,UNAMBIGUOUS_BP
18	77016831	77019600	5circ_002609	2	-	1	2	40	40	T01	2	0	0	1	GTAG	NA	ANCHOR_UNIQUE,CANONICAL,CIRCULAR,PERFECT_EXT,UNAMBIGUOUS_BP
14	89486568	89490787	5circ_002610	4	-	2	4	5	40	T01	4	1	0	1	GTAG	NA	ANCHOR_UNIQUE,CANONICAL,CIRCULAR,GOOD_EXT,UNAMBIGUOUS_BP
17	32333416	32338351	5circ_002611	4	-	2	4	40	5	T01	4	0	0	1	GTAG	NA	ANCHOR_UNIQUE,CANONICAL,CIRCULAR,PERFECT_EXT,UNAMBIGUOUS_BP
9	112262434	112297916	5circ_002612	5	-	3	5	40	40	T01	5	0	0	1	GTAG	NA	ANCHOR_UNIQUE,CANONICAL,CIRCULAR,PERFECT_EXT,UNAMBIGUOUS_BP
8	123093590	123105464	5circ_002613	15	+	3	11	40	5	T01	15	0	0	1	GTAG	NA	ANCHOR_UNIQUE,CANONICAL,CIRCULAR,PERFECT_EXT,UNAMBIGUOUS_BP
12	56603358	56605327	5circ_002614	31	-	9	31	40	40	T01	31	0	0	1	GTAG	NA	ANCHOR_UNIQUE,CANONICAL,CIRCULAR,PERFECT_EXT,UNAMBIGUOUS_BP
4	56011411	56011985	5circ_002615	8	+	6	8	40	40	T01	8	0	0	1	GTAG	NA	ANCHOR_UNIQUE,CANONICAL,CIRCULAR,PERFECT_EXT,UNAMBIGUOUS_BP
11	47482694	47489024	5circ_002616	2	-	2	2	40	40	T01	2	0	0	1	GTAG	NA	ANCHOR_UNIQUE,CANONICAL,CIRCULAR,PERFECT_EXT,UNAMBIGUOUS_BP
11	34957383	34978182	5circ_002617	6	+	3	6	5	5	T01	6	0	0	1	GTAG	NA	ANCHOR_UNIQUE,CANONICAL,CIRCULAR,PERFECT_EXT,UNAMBIGUOUS_BP
22	21763614	21799128	5circ_002618	4	-	2	4	40	5	T01	4	0	0	1	GTAG	NA	ANCHOR_UNIQUE,CANONICAL,CIRCULAR,PERFECT_EXT,UNAMBIGUOUS_BP
14	101991526	101997274	5circ_002619	2	+	2	2	40	40	T01	2	0	0	1	GTAG	NA	ANCHOR_UNIQUE,CANONICAL,CIRCULAR,PERFECT_EXT,UNAMBIGUOUS_BP
22	41154994	41160722	5circ_002621	2	+	2	2	35	40	T01	2	1	0	1	GTAG	NA	ANCHOR_UNIQUE,CANONICAL,CIRCULAR,GOOD_EXT,UNAMBIGUOUS_BP
12	22640028	22661205	5circ_002624	3	+	1	3	5	35	T01	3	0	0	1	GTAG	NA	ANCHOR_UNIQUE,CANONICAL,CIRCULAR,PERFECT_EXT,UNAMBIGUOUS_BP
1	25448807	25456831	5circ_002625	14	+	8	12	40	40	T01	14	0	0	1	GTAG	NA	ANCHOR_UNIQUE,CANONICAL,CIRCULAR,PERFECT_EXT,UNAMBIGUOUS_BP
3	133608534	133617326	5circ_002626	2	-	2	2	40	40	T01	2	0	0	1	GTAG	NA	ANCHOR_UNIQUE,CANONICAL,CIRCULAR,PERFECT_EXT,UNAMBIGUOUS_BP
16	71676446	71684601	5circ_002627	22	-	10	22	40	40	T01	22	0	0	1	GTAG	NA	ANCHOR_UNIQUE,CANONICAL,CIRCULAR,PERFECT_EXT,UNAMBIGUOUS_BP
10	125730287	125741201	5circ_002630	16	+	2	16	40	40	T01	16	0	0	1	GTAG	NA	ANCHOR_UNIQUE,CANONICAL,CIRCULAR,PERFECT_EXT,UNAMBIGUOUS_BP
20	44503814	44510028	5circ_002631	13	-	6	13	40	40	T01	13	0	0	1	GTAG	NA	ANCHOR_UNIQUE,CANONICAL,CIRCULAR,PERFECT_EXT,UNAMBIGUOUS_BP
18	79919183	79943462	5circ_002632	5	-	1	5	40	35	T01	5	0	0	1	GTAG	NA	ANCHOR_UNIQUE,CANONICAL,CIRCULAR,PERFECT_EXT,UNAMBIGUOUS_BP
2	201760880	201761818	5circ_002634	29	-	10	29	40	40	T01	29	0	0	1	GTAG	NA	ANCHOR_UNIQUE,CANONICAL,CIRCULAR,PERFECT_EXT,UNAMBIGUOUS_BP
9	111428041	111437108	5circ_002635	3	-	1	3	5	40	T01	3	0	0	1	GTAG	NA	ANCHOR_UNIQUE,CANONICAL,CIRCULAR,PERFECT_EXT,UNAMBIGUOUS_BP
13	26299566	26353880	5circ_002636	8	+	2	8	40	40	T01	8	0	0	1	GTAG	NA	ANCHOR_UNIQUE,CANONICAL,CIRCULAR,PERFECT_EXT,UNAMBIGUOUS_BP
1	174768996	174811960	5circ_002638	2	+	1	2	5	5	T01	2	0	0	1	GTAG	NA	ANCHOR_UNIQUE,CANONICAL,CIRCULAR,PERFECT_EXT,UNAMBIGUOUS_BP
1	29035825	29039426	5circ_002639	70	+	31	69	40	40	T01	70	0	0	1	GTAG	NA	ANCHOR_UNIQUE,CANONICAL,CIRCULAR,PERFECT_EXT,UNAMBIGUOUS_BP
17	61015750	61040892	5circ_002640	5	+	2	5	35	40	T01	5	0	0	1	GTAG	NA	ANCHOR_UNIQUE,CANONICAL,CIRCULAR,PERFECT_EXT,UNAMBIGUOUS_BP
10	34450316	34517159	5circ_002641	2	-	1	2	5	40	T01	2	0	0	1	GTAG	NA	ANCHOR_UNIQUE,CANONICAL,CIRCULAR,PERFECT_EXT,UNAMBIGUOUS_BP
1	61158874	61160583	5circ_002642	3	+	1	3	40	5	T01	3	0	0	1	GTAG	NA	ANCHOR_UNIQUE,CANONICAL,CIRCULAR,PERFECT_EXT,UNAMBIGUOUS_BP
13	79365577	79378907	5circ_002645	2	-	2	2	40	40	T01	2	0	0	1	GTAG	NA	ANCHOR_UNIQUE,CANONICAL,CIRCULAR,PERFECT_EXT,UNAMBIGUOUS_BP
9	100441905	100442356	5circ_002646	5	+	3	4	5	37	T01	5	0	0	1	GTAG	NA	ANCHOR_UNIQUE,CANONICAL,CIRCULAR,PERFECT_EXT,UNAMBIGUOUS_BP
11	108235669	108245026	5circ_002648	7	+	2	7	40	40	T01	7	0	0	1	GTAG	NA	ANCHOR_UNIQUE,CANONICAL,CIRCULAR,PERFECT_EXT,UNAMBIGUOUS_BP
12	51055834	51056502	5circ_002649	27	+	9	27	40	40	T01	27	0	0	1	GTAG	NA	ANCHOR_UNIQUE,CANONICAL,CIRCULAR,PERFECT_EXT,UNAMBIGUOUS_BP
9	34220907	34222431	5circ_002650	2	+	1	2	5	40	T01	2	0	0	1	GTAG	NA	ANCHOR_UNIQUE,CANONICAL,CIRCULAR,PERFECT_EXT,UNAMBIGUOUS_BP
2	218384242	218387955	5circ_002652	13	+	6	13	40	40	T01	13	0	0	1	GTAG	NA	ANCHOR_UNIQUE,CANONICAL,CIRCULAR,PERFECT_EXT,UNAMBIGUOUS_BP
14	96520054	96521072	5circ_002653	3	+	2	3	40	40	T01	3	0	0	1	GTAG	NA	ANCHOR_UNIQUE,CANONICAL,CIRCULAR,PERFECT_EXT,UNAMBIGUOUS_BP
13	19741564	19782791	5circ_002654	4	-	1	4	40	40	T01	4	0	0	1	GTAG	NA	ANCHOR_UNIQUE,CANONICAL,CIRCULAR,PERFECT_EXT,UNAMBIGUOUS_BP
[truncated: 6,658 more rows]

## Sheet: T02.find_circ_Predict
#chrom	start	end	name	n_reads	strand	n_uniq	uniq_bridges	best_qual_left	best_qual_right	tissues	tiss_counts	edits	anchor_overlap	breakpoints	signal	strandmatch	category
18	77009848	77017268	5circ_000001	3	-	2	3	5	40	T02	3	0	0	1	GTAG	NA	ANCHOR_UNIQUE,CANONICAL,CIRCULAR,PERFECT_EXT,UNAMBIGUOUS_BP
6	37282184	37316830	5circ_000002	3	+	1	3	40	40	T02	3	0	0	1	GTAG	NA	ANCHOR_UNIQUE,CANONICAL,CIRCULAR,PERFECT_EXT,UNAMBIGUOUS_BP
1	47287550	47300072	5circ_000003	8	-	2	5	40	5	T02	8	0	0	1	GTAG	NA	ANCHOR_UNIQUE,CANONICAL,CIRCULAR,PERFECT_EXT,UNAMBIGUOUS_BP
1	10132368	10137205	5circ_000004	2	+	1	2	40	40	T02	2	0	0	1	GTAG	NA	ANCHOR_UNIQUE,CANONICAL,CIRCULAR,PERFECT_EXT,UNAMBIGUOUS_BP
1	158619221	158652653	5circ_000005	13	-	3	13	40	40	T02	13	0	0	1	GTAG	NA	ANCHOR_UNIQUE,CANONICAL,CIRCULAR,PERFECT_EXT,UNAMBIGUOUS_BP
3	152414940	152432920	5circ_000008	40	+	14	38	40	40	T02	40	0	0	1	GTAG	NA	ANCHOR_UNIQUE,CANONICAL,CIRCULAR,PERFECT_EXT,UNAMBIGUOUS_BP
8	41661800	41663742	5circ_000009	5	-	2	5	40	40	T02	5	0	0	1	GTAG	NA	ANCHOR_UNIQUE,CANONICAL,CIRCULAR,PERFECT_EXT,UNAMBIGUOUS_BP
X	71110155	71111050	5circ_000010	6	-	2	6	40	40	T02	6	0	0	1	GTAG	NA	ANCHOR_UNIQUE,CANONICAL,CIRCULAR,PERFECT_EXT,UNAMBIGUOUS_BP
21	45128401	45134832	5circ_000011	6	+	4	6	40	40	T02	6	0	0	1	GTAG	NA	ANCHOR_UNIQUE,CANONICAL,CIRCULAR,PERFECT_EXT,UNAMBIGUOUS_BP
15	65700543	65701890	5circ_000012	8	-	4	8	40	40	T02	8	0	0	1	GTAG	NA	ANCHOR_UNIQUE,CANONICAL,CIRCULAR,PERFECT_EXT,UNAMBIGUOUS_BP
15	94440175	94470442	5circ_000015	2	+	2	2	40	40	T02	2	0	0	1	GTAG	NA	ANCHOR_UNIQUE,CANONICAL,CIRCULAR,PERFECT_EXT,UNAMBIGUOUS_BP
11	12204249	12216319	5circ_000016	4	+	2	4	40	40	T02	4	0	0	1	GTAG	NA	ANCHOR_UNIQUE,CANONICAL,CIRCULAR,PERFECT_EXT,UNAMBIGUOUS_BP
2	32575155	32594060	5circ_000017	4	+	3	4	40	40	T02	4	0	0	1	GTAG	NA	ANCHOR_UNIQUE,CANONICAL,CIRCULAR,PERFECT_EXT,UNAMBIGUOUS_BP
3	196064308	196068130	5circ_000019	8	-	2	8	40	40	T02	8	0	0	1	GTAG	NA	ANCHOR_UNIQUE,CANONICAL,CIRCULAR,PERFECT_EXT,UNAMBIGUOUS_BP
10	27566831	27578713	5circ_000020	2	+	2	2	5	5	T02	2	1	0	1	GTAG	NA	ANCHOR_UNIQUE,CANONICAL,CIRCULAR,GOOD_EXT,UNAMBIGUOUS_BP
2	206056197	206086042	5circ_000021	8	-	2	8	40	40	T02	8	0	0	1	GTAG	NA	ANCHOR_UNIQUE,CANONICAL,CIRCULAR,PERFECT_EXT,UNAMBIGUOUS_BP
21	43867138	43867594	5circ_000022	2	+	1	2	40	40	T02	2	0	0	1	GTAG	NA	ANCHOR_UNIQUE,CANONICAL,CIRCULAR,PERFECT_EXT,UNAMBIGUOUS_BP
5	133959493	133960020	5circ_000023	4	-	3	2	5	40	T02	4	0	0	1	GTAG	NA	ANCHOR_UNIQUE,CANONICAL,CIRCULAR,PERFECT_EXT,UNAMBIGUOUS_BP
2	43225802	43226264	5circ_000026	2	-	2	2	40	5	T02	2	0	0	1	GTAG	NA	ANCHOR_UNIQUE,CANONICAL,CIRCULAR,PERFECT_EXT,UNAMBIGUOUS_BP
16	28111816	28125848	5circ_000027	4	-	2	4	40	40	T02	4	0	0	1	GTAG	NA	ANCHOR_UNIQUE,CANONICAL,CIRCULAR,PERFECT_EXT,UNAMBIGUOUS_BP
17	46963696	46965039	5circ_000028	3	+	1	3	40	5	T02	3	1	0	1	GTAG	NA	ANCHOR_UNIQUE,CANONICAL,CIRCULAR,GOOD_EXT,UNAMBIGUOUS_BP
8	41699451	41706241	5circ_000029	3	-	2	3	40	40	T02	3	0	0	1	GTAG	NA	ANCHOR_UNIQUE,CANONICAL,CIRCULAR,PERFECT_EXT,UNAMBIGUOUS_BP
1	172551511	172570730	5circ_000031	8	+	1	8	5	5	T02	8	0	0	1	GTAG	NA	ANCHOR_UNIQUE,CANONICAL,CIRCULAR,PERFECT_EXT,UNAMBIGUOUS_BP
22	19820597	19821375	5circ_000032	3	-	1	3	5	40	T02	3	0	0	1	GTAG	NA	ANCHOR_UNIQUE,CANONICAL,CIRCULAR,PERFECT_EXT,UNAMBIGUOUS_BP
11	62839113	62839867	5circ_000033	14	-	4	14	40	40	T02	14	0	0	1	GTAG	NA	ANCHOR_UNIQUE,CANONICAL,CIRCULAR,PERFECT_EXT,UNAMBIGUOUS_BP
8	91133109	91137018	5circ_000034	2	+	1	2	40	5	T02	2	0	0	1	GTAG	NA	ANCHOR_UNIQUE,CANONICAL,CIRCULAR,PERFECT_EXT,UNAMBIGUOUS_BP
7	130120748	130122202	5circ_000035	24	+	11	24	40	40	T02	24	0	0	1	GTAG	NA	ANCHOR_UNIQUE,CANONICAL,CIRCULAR,PERFECT_EXT,UNAMBIGUOUS_BP
3	152414940	152459345	5circ_000036	2	+	2	2	40	35	T02	2	0	0	1	GTAG	NA	ANCHOR_UNIQUE,CANONICAL,CIRCULAR,PERFECT_EXT,UNAMBIGUOUS_BP
12	102153868	102205152	5circ_000037	6	+	1	6	5	40	T02	6	0	0	1	GTAG	NA	ANCHOR_UNIQUE,CANONICAL,CIRCULAR,PERFECT_EXT,UNAMBIGUOUS_BP
9	137790847	137803010	5circ_000039	10	+	2	10	40	5	T02	10	0	0	1	GTAG	NA	ANCHOR_UNIQUE,CANONICAL,CIRCULAR,PERFECT_EXT,UNAMBIGUOUS_BP
22	37472442	37474677	5circ_000040	2	-	2	2	40	5	T02	2	0	0	1	GTAG	NA	ANCHOR_UNIQUE,CANONICAL,CIRCULAR,PERFECT_EXT,UNAMBIGUOUS_BP
21	45504010	45511226	5circ_000041	2	+	1	2	5	40	T02	2	0	0	1	GTAG	NA	ANCHOR_UNIQUE,CANONICAL,CIRCULAR,PERFECT_EXT,UNAMBIGUOUS_BP
10	70139909	70140098	5circ_000042	3	+	1	3	40	5	T02	3	0	0	1	GTAG	NA	ANCHOR_UNIQUE,CANONICAL,CIRCULAR,PERFECT_EXT,UNAMBIGUOUS_BP
12	46239678	46243314	5circ_000043	6	-	5	6	40	40	T02	6	0	0	1	GTAG	NA	ANCHOR_UNIQUE,CANONICAL,CIRCULAR,PERFECT_EXT,UNAMBIGUOUS_BP
3	122610493	122621611	5circ_000044	2	+	2	2	40	40	T02	2	0	0	1	GTAG	NA	ANCHOR_UNIQUE,CANONICAL,CIRCULAR,PERFECT_EXT,UNAMBIGUOUS_BP
20	45844262	45848675	5circ_000045	3	-	1	3	40	40	T02	3	0	0	1	GTAG	NA	ANCHOR_UNIQUE,CANONICAL,CIRCULAR,PERFECT_EXT,UNAMBIGUOUS_BP
X	55015577	55020504	5circ_000046	16	-	5	16	40	40	T02	16	0	0	1	GTAG	NA	ANCHOR_UNIQUE,CANONICAL,CIRCULAR,PERFECT_EXT,UNAMBIGUOUS_BP
13	95210691	95234834	5circ_000047	6	-	5	6	40	40	T02	6	0	0	1	GTAG	NA	ANCHOR_UNIQUE,CANONICAL,CIRCULAR,PERFECT_EXT,UNAMBIGUOUS_BP
16	71667177	71681905	5circ_000048	11	-	6	11	40	40	T02	11	0	0	1	GTAG	NA	ANCHOR_UNIQUE,CANONICAL,CIRCULAR,PERFECT_EXT,UNAMBIGUOUS_BP
19	10904950	10909207	5circ_000049	77	+	25	77	40	40	T02	77	0	0	1	GTAG	NA	ANCHOR_UNIQUE,CANONICAL,CIRCULAR,PERFECT_EXT,UNAMBIGUOUS_BP
11	224077	233215	5circ_000050	4	-	2	4	40	5	T02	4	1	0	1	GTAG	NA	ANCHOR_UNIQUE,CANONICAL,CIRCULAR,GOOD_EXT,UNAMBIGUOUS_BP
9	33886880	33900271	5circ_000051	2	+	1	2	40	40	T02	2	0	0	1	GTAG	NA	ANCHOR_UNIQUE,CANONICAL,CIRCULAR,PERFECT_EXT,UNAMBIGUOUS_BP
1	40190771	40202614	5circ_000052	5	+	1	5	40	5	T02	5	0	0	1	GTAG	NA	ANCHOR_UNIQUE,CANONICAL,CIRCULAR,PERFECT_EXT,UNAMBIGUOUS_BP
5	79619611	79623489	5circ_000053	14	+	6	14	40	40	T02	14	0	0	1	GTAG	NA	ANCHOR_UNIQUE,CANONICAL,CIRCULAR,PERFECT_EXT,UNAMBIGUOUS_BP
4	143437998	143440382	5circ_000054	14	+	7	13	40	40	T02	14	0	0	1	GTAG	NA	ANCHOR_UNIQUE,CANONICAL,CIRCULAR,PERFECT_EXT,UNAMBIGUOUS_BP
14	93251462	93263993	5circ_000055	2	-	2	2	5	40	T02	2	0	0	1	GTAG	NA	ANCHOR_UNIQUE,CANONICAL,CIRCULAR,PERFECT_EXT,UNAMBIGUOUS_BP
7	100553346	100554258	5circ_000056	2	+	2	2	40	5	T02	2	0	0	1	GTAG	NA	ANCHOR_UNIQUE,CANONICAL,CIRCULAR,PERFECT_EXT,UNAMBIGUOUS_BP
3	130967144	130969396	5circ_000058	2	+	1	2	5	40	T02	2	0	0	1	GTAG	NA	ANCHOR_UNIQUE,CANONICAL,CIRCULAR,PERFECT_EXT,UNAMBIGUOUS_BP
20	63928334	63931022	5circ_000059	61	+	25	47	40	40	T02	61	0	0	1	GTAG	NA	ANCHOR_UNIQUE,CANONICAL,CIRCULAR,PERFECT_EXT,UNAMBIGUOUS_BP
6	135300499	135323324	5circ_000060	6	-	1	6	40	5	T02	6	0	0	1	GTAG	NA	ANCHOR_UNIQUE,CANONICAL,CIRCULAR,PERFECT_EXT,UNAMBIGUOUS_BP
9	125153532	125160906	5circ_000061	2	-	2	2	40	40	T02	2	0	0	1	GTAG	NA	ANCHOR_UNIQUE,CANONICAL,CIRCULAR,PERFECT_EXT,UNAMBIGUOUS_BP
16	70324584	70325688	5circ_000062	4	+	1	4	40	5	T02	4	0	0	1	GTAG	NA	ANCHOR_UNIQUE,CANONICAL,CIRCULAR,PERFECT_EXT,UNAMBIGUOUS_BP
10	32469624	32474023	5circ_000063	2	+	1	2	5	5	T02	2	0	0	1	GTAG	NA	ANCHOR_UNIQUE,CANONICAL,CIRCULAR,PERFECT_EXT,UNAMBIGUOUS_BP
11	47166267	47168251	5circ_000064	5	-	3	5	5	40	T02	5	0	0	1	GTAG	NA	ANCHOR_UNIQUE,CANONICAL,CIRCULAR,PERFECT_EXT,UNAMBIGUOUS_BP
20	50127974	50130947	5circ_000065	13	-	3	13	40	40	T02	13	0	0	1	GTAG	NA	ANCHOR_UNIQUE,CANONICAL,CIRCULAR,PERFECT_EXT,UNAMBIGUOUS_BP
5	109713519	109729513	5circ_000066	16	+	7	16	40	40	T02	16	0	0	1	GTAG	NA	ANCHOR_UNIQUE,CANONICAL,CIRCULAR,PERFECT_EXT,UNAMBIGUOUS_BP
19	49480297	49480620	5circ_000067	12	+	7	10	40	40	T02	12	0	0	1	GTAG	NA	ANCHOR_UNIQUE,CANONICAL,CIRCULAR,PERFECT_EXT,UNAMBIGUOUS_BP
12	40328359	40348509	5circ_000069	3	+	1	3	5	40	T02	3	0	0	1	GTAG	NA	ANCHOR_UNIQUE,CANONICAL,CIRCULAR,PERFECT_EXT,UNAMBIGUOUS_BP
12	6509716	6511252	5circ_000070	5	+	3	5	40	40	T02	5	0	0	1	GTAG	NA	ANCHOR_UNIQUE,CANONICAL,CIRCULAR,PERFECT_EXT,UNAMBIGUOUS_BP
11	17954152	18008076	5circ_000071	2	-	2	2	5	5	T02	2	0	0	1	GTAG	NA	ANCHOR_UNIQUE,CANONICAL,CIRCULAR,PERFECT_EXT,UNAMBIGUOUS_BP
17	20017986	20067287	5circ_000072	2	+	1	2	40	5	T02	2	0	0	1	GTAG	NA	ANCHOR_UNIQUE,CANONICAL,CIRCULAR,PERFECT_EXT,UNAMBIGUOUS_BP
4	39913610	39925933	5circ_000073	22	-	11	20	40	40	T02	22	0	0	1	GTAG	NA	ANCHOR_UNIQUE,CANONICAL,CIRCULAR,PERFECT_EXT,UNAMBIGUOUS_BP
11	111836164	111857737	5circ_000074	2	-	2	2	40	40	T02	2	0	0	1	GTAG	NA	ANCHOR_UNIQUE,CANONICAL,CIRCULAR,PERFECT_EXT,UNAMBIGUOUS_BP
19	5131075	5138070	5circ_000075	8	+	2	8	40	40	T02	8	0	0	1	GTAG	NA	ANCHOR_UNIQUE,CANONICAL,CIRCULAR,PERFECT_EXT,UNAMBIGUOUS_BP
15	98908684	98913282	5circ_000076	8	+	1	8	40	40	T02	8	0	0	1	GTAG	NA	ANCHOR_UNIQUE,CANONICAL,CIRCULAR,PERFECT_EXT,UNAMBIGUOUS_BP
3	136586801	136591549	5circ_000077	3	-	1	3	40	5	T02	3	0	0	1	GTAG	NA	ANCHOR_UNIQUE,CANONICAL,CIRCULAR,PERFECT_EXT,UNAMBIGUOUS_BP
12	116230532	116237705	5circ_000078	98	-	38	95	40	40	T02	98	0	0	1	GTAG	NA	ANCHOR_UNIQUE,CANONICAL,CIRCULAR,PERFECT_EXT,UNAMBIGUOUS_BP
11	5225496	5226983	5circ_000080	2	+	2	2	40	5	T02	2	1	0	1	GTAG	NA	ANCHOR_UNIQUE,CANONICAL,CIRCULAR,GOOD_EXT,UNAMBIGUOUS_BP
16	68122580	68122892	5circ_000082	4	-	2	4	40	40	T02	4	1	0	1	GTAG	NA	ANCHOR_UNIQUE,CANONICAL,CIRCULAR,GOOD_EXT,UNAMBIGUOUS_BP
6	161073465	161089471	5circ_000083	4	+	3	3	40	40	T02	4	0	0	1	GTAG	NA	ANCHOR_UNIQUE,CANONICAL,CIRCULAR,PERFECT_EXT,UNAMBIGUOUS_BP
10	4830674	4847299	5circ_000084	20	+	6	20	40	40	T02	20	0	0	1	GTAG	NA	ANCHOR_UNIQUE,CANONICAL,CIRCULAR,PERFECT_EXT,UNAMBIGUOUS_BP
14	60114699	60116060	5circ_000085	4	+	1	4	5	5	T02	4	0	0	1	GTAG	NA	ANCHOR_UNIQUE,CANONICAL,CIRCULAR,PERFECT_EXT,UNAMBIGUOUS_BP
2	61493893	61497007	5circ_000086	6	-	2	6	40	40	T02	6	0	0	1	GTAG	NA	ANCHOR_UNIQUE,CANONICAL,CIRCULAR,PERFECT_EXT,UNAMBIGUOUS_BP
2	223884647	223895630	5circ_000088	4	-	1	4	40	5	T02	4	0	0	1	GTAG	NA	ANCHOR_UNIQUE,CANONICAL,CIRCULAR,PERFECT_EXT,UNAMBIGUOUS_BP
1	202157738	202158248	5circ_000089	2	-	1	2	40	40	T02	2	0	0	1	GTAG	NA	ANCHOR_UNIQUE,CANONICAL,CIRCULAR,PERFECT_EXT,UNAMBIGUOUS_BP
19	17567405	17568713	5circ_000090	3	+	3	3	40	40	T02	3	0	0	1	GTAG	NA	ANCHOR_UNIQUE,CANONICAL,CIRCULAR,PERFECT_EXT,UNAMBIGUOUS_BP
6	166328380	166329506	5circ_000091	3	-	1	3	40	40	T02	3	0	0	1	GTAG	NA	ANCHOR_UNIQUE,CANONICAL,CIRCULAR,PERFECT_EXT,UNAMBIGUOUS_BP
20	63928334	63929525	5circ_000092	4	+	1	4	5	5	T02	4	0	0	1	GTAG	NA	ANCHOR_UNIQUE,CANONICAL,CIRCULAR,PERFECT_EXT,UNAMBIGUOUS_BP
11	16111802	16186955	5circ_000093	141	-	45	136	40	40	T02	141	0	0	1	GTAG	NA	ANCHOR_UNIQUE,CANONICAL,CIRCULAR,PERFECT_EXT,UNAMBIGUOUS_BP
16	27434346	27437687	5circ_000094	10	+	5	10	40	40	T02	10	0	0	1	GTAG	NA	ANCHOR_UNIQUE,CANONICAL,CIRCULAR,PERFECT_EXT,UNAMBIGUOUS_BP
19	11513055	11514221	5circ_000095	82	-	22	82	40	40	T02	82	0	0	1	GTAG	NA	ANCHOR_UNIQUE,CANONICAL,CIRCULAR,PERFECT_EXT,UNAMBIGUOUS_BP
1	28987430	28987905	5circ_000096	11	+	5	9	40	40	T02	11	0	0	1	GTAG	NA	ANCHOR_UNIQUE,CANONICAL,CIRCULAR,PERFECT_EXT,UNAMBIGUOUS_BP
16	8858349	8859335	5circ_000097	73	-	41	71	40	40	T02	73	0	0	1	GTAG	NA	ANCHOR_UNIQUE,CANONICAL,CIRCULAR,PERFECT_EXT,UNAMBIGUOUS_BP
13	32732100	32735330	5circ_000098	10	+	3	10	40	40	T02	10	0	0	1	GTAG	NA	ANCHOR_UNIQUE,CANONICAL,CIRCULAR,PERFECT_EXT,UNAMBIGUOUS_BP
5	75685206	75692500	5circ_000099	3	-	1	3	40	35	T02	3	0	0	1	GTAG	NA	ANCHOR_UNIQUE,CANONICAL,CIRCULAR,PERFECT_EXT,UNAMBIGUOUS_BP
15	91008903	91009846	5circ_000100	3	-	1	3	40	40	T02	3	0	0	1	GTAG	NA	ANCHOR_UNIQUE,CANONICAL,CIRCULAR,PERFECT_EXT,UNAMBIGUOUS_BP
15	65702304	65703008	5circ_000101	19	-	8	19	40	40	T02	19	0	0	1	GTAG	NA	ANCHOR_UNIQUE,CANONICAL,CIRCULAR,PERFECT_EXT,UNAMBIGUOUS_BP
1	224400949	224411565	5circ_000102	4	-	4	4	40	40	T02	4	0	0	1	GTAG	NA	ANCHOR_UNIQUE,CANONICAL,CIRCULAR,PERFECT_EXT,UNAMBIGUOUS_BP
20	2947981	2965202	5circ_000103	25	+	7	24	35	40	T02	25	0	0	1	GTAG	NA	ANCHOR_UNIQUE,CANONICAL,CIRCULAR,PERFECT_EXT,UNAMBIGUOUS_BP
15	42950261	42966286	5circ_000104	21	-	7	21	40	40	T02	21	0	0	1	GTAG	NA	ANCHOR_UNIQUE,CANONICAL,CIRCULAR,PERFECT_EXT,UNAMBIGUOUS_BP
4	177353307	177353728	5circ_000105	47	+	18	43	40	40	T02	47	0	0	1	GTAG	NA	ANCHOR_UNIQUE,CANONICAL,CIRCULAR,PERFECT_EXT,UNAMBIGUOUS_BP
4	128291799	128308920	5circ_000106	3	+	2	3	40	40	T02	3	0	0	1	GTAG	NA	ANCHOR_UNIQUE,CANONICAL,CIRCULAR,PERFECT_EXT,UNAMBIGUOUS_BP
11	65436537	65444059	5circ_000107	9	+	4	8	40	40	T02	9	0	0	1	GTAG	NA	ANCHOR_UNIQUE,CANONICAL,CIRCULAR,PERFECT_EXT,UNAMBIGUOUS_BP
2	23798137	23834078	5circ_000108	12	-	5	12	40	40	T02	12	0	0	1	GTAG	NA	ANCHOR_UNIQUE,CANONICAL,CIRCULAR,PERFECT_EXT,UNAMBIGUOUS_BP
17	78004169	78031842	5circ_000109	11	+	4	11	35	40	T02	11	0	0	1	GTAG	NA	ANCHOR_UNIQUE,CANONICAL,CIRCULAR,PERFECT_EXT,UNAMBIGUOUS_BP
16	16106737	16111582	5circ_000110	2	+	2	1	40	40	T02	2	0	0	1	GTAG	NA	ANCHOR_UNIQUE,CANONICAL,CIRCULAR,PERFECT_EXT,UNAMBIGUOUS_BP
17	44257349	44262934	5circ_000111	3	-	2	3	5	40	T02	3	0	0	1	GTAG	NA	ANCHOR_UNIQUE,CANONICAL,CIRCULAR,PERFECT_EXT,UNAMBIGUOUS_BP
16	15611591	15623096	5circ_000112	5	-	3	4	40	40	T02	5	0	0	1	GTAG	NA	ANCHOR_UNIQUE,CANONICAL,CIRCULAR,PERFECT_EXT,UNAMBIGUOUS_BP
20	37044085	37047190	5circ_000113	4	-	2	4	40	40	T02	4	0	0	1	GTAG	NA	ANCHOR_UNIQUE,CANONICAL,CIRCULAR,PERFECT_EXT,UNAMBIGUOUS_BP
11	125606300	125609589	5circ_000114	6	+	2	6	40	40	T02	6	0	0	1	GTAG	NA	ANCHOR_UNIQUE,CANONICAL,CIRCULAR,PERFECT_EXT,UNAMBIGUOUS_BP
19	43543390	43546977	5circ_000115	7	-	1	7	40	40	T02	7	1	0	1	GTAG	NA	ANCHOR_UNIQUE,CANONICAL,CIRCULAR,GOOD_EXT,UNAMBIGUOUS_BP
4	86772777	86775652	5circ_000116	2	+	2	2	40	40	T02	2	0	0	1	GTAG	NA	ANCHOR_UNIQUE,CANONICAL,CIRCULAR,PERFECT_EXT,UNAMBIGUOUS_BP
3	172247532	172251541	5circ_000117	103	+	41	103	40	40	T02	103	0	0	1	GTAG	NA	ANCHOR_UNIQUE,CANONICAL,CIRCULAR,PERFECT_EXT,UNAMBIGUOUS_BP
8	99502835	99511512	5circ_000118	9	+	3	9	40	40	T02	9	0	0	1	GTAG	NA	ANCHOR_UNIQUE,CANONICAL,CIRCULAR,PERFECT_EXT,UNAMBIGUOUS_BP
19	15378488	15378706	5circ_000119	5	-	2	5	40	40	T02	5	0	0	1	GTAG	NA	ANCHOR_UNIQUE,CANONICAL,CIRCULAR,PERFECT_EXT,UNAMBIGUOUS_BP
22	17112117	17112734	5circ_000121	8	+	1	8	5	40	T02	8	1	0	1	GTAG	NA	ANCHOR_UNIQUE,CANONICAL,CIRCULAR,GOOD_EXT,UNAMBIGUOUS_BP
17	35624396	35641975	5circ_000122	3	+	1	3	40	5	T02	3	0	0	1	GTAG	NA	ANCHOR_UNIQUE,CANONICAL,CIRCULAR,PERFECT_EXT,UNAMBIGUOUS_BP
5	73074741	73078312	5circ_000123	44	+	8	44	40	40	T02	44	0	0	1	GTAG	NA	ANCHOR_UNIQUE,CANONICAL,CIRCULAR,PERFECT_EXT,UNAMBIGUOUS_BP
15	42827927	42840433	5circ_000125	4	-	2	4	40	40	T02	4	0	0	1	GTAG	NA	ANCHOR_UNIQUE,CANONICAL,CIRCULAR,PERFECT_EXT,UNAMBIGUOUS_BP
1	235437321	235442911	5circ_000126	2	+	1	2	35	5	T02	2	0	0	1	GTAG	NA	ANCHOR_UNIQUE,CANONICAL,CIRCULAR,PERFECT_EXT,UNAMBIGUOUS_BP
22	29822334	29825780	5circ_000127	3	-	1	3	40	40	T02	3	0	0	1	GTAG	NA	ANCHOR_UNIQUE,CANONICAL,CIRCULAR,PERFECT_EXT,UNAMBIGUOUS_BP
1	95143890	95191681	5circ_000128	8	+	2	8	40	40	T02	8	0	0	1	GTAG	NA	ANCHOR_UNIQUE,CANONICAL,CIRCULAR,PERFECT_EXT,UNAMBIGUOUS_BP
16	67744287	67759732	5circ_000129	10	-	3	10	40	40	T02	10	0	0	1	GTAG	NA	ANCHOR_UNIQUE,CANONICAL,CIRCULAR,PERFECT_EXT,UNAMBIGUOUS_BP
20	5176647	5178956	5circ_000132	6	+	1	6	40	40	T02	6	0	0	1	GTAG	NA	ANCHOR_UNIQUE,CANONICAL,CIRCULAR,PERFECT_EXT,UNAMBIGUOUS_BP
2	206127796	206133105	5circ_000134	3	-	1	3	40	40	T02	3	0	0	1	GTAG	NA	ANCHOR_UNIQUE,CANONICAL,CIRCULAR,PERFECT_EXT,UNAMBIGUOUS_BP
8	109412264	109420690	5circ_000135	10	+	2	10	40	40	T02	10	0	0	1	GTAG	NA	ANCHOR_UNIQUE,CANONICAL,CIRCULAR,PERFECT_EXT,UNAMBIGUOUS_BP
20	47246007	47246517	5circ_000136	10	-	6	10	40	40	T02	10	0	0	1	GTAG	NA	ANCHOR_UNIQUE,CANONICAL,CIRCULAR,PERFECT_EXT,UNAMBIGUOUS_BP
14	64107490	64121061	5circ_000137	2	+	1	2	40	40	T02	2	0	0	1	GTAG	NA	ANCHOR_UNIQUE,CANONICAL,CIRCULAR,PERFECT_EXT,UNAMBIGUOUS_BP
14	21503172	21503881	5circ_000138	146	-	34	144	40	40	T02	146	0	0	1	GTAG	NA	ANCHOR_UNIQUE,CANONICAL,CIRCULAR,PERFECT_EXT,UNAMBIGUOUS_BP
18	12353004	12356831	5circ_000139	2	-	1	2	5	5	T02	2	0	0	1	GTAG	NA	ANCHOR_UNIQUE,CANONICAL,CIRCULAR,PERFECT_EXT,UNAMBIGUOUS_BP
5	179823857	179825226	5circ_000140	6	+	2	6	40	40	T02	6	0	0	1	GTAG	NA	ANCHOR_UNIQUE,CANONICAL,CIRCULAR,PERFECT_EXT,UNAMBIGUOUS_BP
17	39684596	39686019	5circ_000141	17	-	7	17	40	40	T02	17	0	0	1	GTAG	NA	ANCHOR_UNIQUE,CANONICAL,CIRCULAR,PERFECT_EXT,UNAMBIGUOUS_BP
1	9743883	9744643	5circ_000142	3	-	1	3	5	40	T02	3	0	0	1	GTAG	NA	ANCHOR_UNIQUE,CANONICAL,CIRCULAR,PERFECT_EXT,UNAMBIGUOUS_BP
2	189719571	189720787	5circ_000143	6	+	2	6	5	40	T02	6	0	0	1	GTAG	NA	ANCHOR_UNIQUE,CANONICAL,CIRCULAR,PERFECT_EXT,UNAMBIGUOUS_BP
6	30722645	30722917	5circ_000144	2	+	2	2	40	5	T02	2	0	0	1	GTAG	NA	ANCHOR_UNIQUE,CANONICAL,CIRCULAR,PERFECT_EXT,UNAMBIGUOUS_BP
22	19361236	19396947	5circ_000146	6	-	2	6	40	40	T02	6	0	0	1	GTAG	NA	ANCHOR_UNIQUE,CANONICAL,CIRCULAR,PERFECT_EXT,UNAMBIGUOUS_BP
22	17145023	17149745	5circ_000147	3	-	2	2	40	40	T02	3	0	0	1	GTAG	NA	ANCHOR_UNIQUE,CANONICAL,CIRCULAR,PERFECT_EXT,UNAMBIGUOUS_BP
2	68490189	68513680	5circ_000148	3	+	2	3	40	5	T02	3	0	0	1	GTAG	NA	ANCHOR_UNIQUE,CANONICAL,CIRCULAR,PERFECT_EXT,UNAMBIGUOUS_BP
9	125330077	125337591	5circ_000149	2	+	1	2	40	5	T02	2	0	1	1	GTAG	NA	ANCHOR_UNIQUE,CANONICAL,CIRCULAR,GOOD_EXT,UNAMBIGUOUS_BP
1	225852663	225857017	5circ_000150	4	-	1	4	40	5	T02	4	0	0	1	GTAG	NA	ANCHOR_UNIQUE,CANONICAL,CIRCULAR,PERFECT_EXT,UNAMBIGUOUS_BP
8	41704040	41714254	5circ_000151	42	-	9	42	40	40	T02	42	0	0	1	GTAG	NA	ANCHOR_UNIQUE,CANONICAL,CIRCULAR,PERFECT_EXT,UNAMBIGUOUS_BP
4	88107183	88113553	5circ_000154	2	-	1	2	5	40	T02	2	0	0	1	GTAG	NA	ANCHOR_UNIQUE,CANONICAL,CIRCULAR,PERFECT_EXT,UNAMBIGUOUS_BP
11	114063210	114064568	5circ_000155	2	+	2	2	5	40	T02	2	0	0	1	GTAG	NA	ANCHOR_UNIQUE,CANONICAL,CIRCULAR,PERFECT_EXT,UNAMBIGUOUS_BP
11	12116714	12162419	5circ_000156	4	+	2	4	40	40	T02	4	0	0	1	GTAG	NA	ANCHOR_UNIQUE,CANONICAL,CIRCULAR,PERFECT_EXT,UNAMBIGUOUS_BP
9	105534492	105539351	5circ_000157	5	+	1	5	5	40	T02	5	0	0	1	GTAG	NA	ANCHOR_UNIQUE,CANONICAL,CIRCULAR,PERFECT_EXT,UNAMBIGUOUS_BP
6	31648676	31651776	5circ_000158	2	-	1	2	40	40	T02	2	2	0	1	GTAG	NA	ANCHOR_UNIQUE,CANONICAL,CIRCULAR,OK_EXT,UNAMBIGUOUS_BP
12	328834	334422	5circ_000159	4	-	2	4	40	40	T02	4	0	0	1	GTAG	NA	ANCHOR_UNIQUE,CANONICAL,CIRCULAR,PERFECT_EXT,UNAMBIGUOUS_BP
11	3768580	3771928	5circ_000160	3	-	1	3	40	40	T02	3	0	0	1	GTAG	NA	ANCHOR_UNIQUE,CANONICAL,CIRCULAR,PERFECT_EXT,UNAMBIGUOUS_BP
X	65075473	65113813	5circ_000161	5	+	3	2	40	40	T02	5	0	0	1	GTAG	NA	ANCHOR_UNIQUE,CANONICAL,CIRCULAR,PERFECT_EXT,UNAMBIGUOUS_BP
4	109491326	109494856	5circ_000163	130	+	32	127	40	40	T02	130	0	0	1	GTAG	NA	ANCHOR_UNIQUE,CANONICAL,CIRCULAR,PERFECT_EXT,UNAMBIGUOUS_BP
5	172052928	172061268	5circ_000164	4	-	2	4	40	40	T02	4	0	0	1	GTAG	NA	ANCHOR_UNIQUE,CANONICAL,CIRCULAR,PERFECT_EXT,UNAMBIGUOUS_BP
1	27841013	27843330	5circ_000165	4	+	1	4	5	5	T02	4	0	0	1	GTAG	NA	ANCHOR_UNIQUE,CANONICAL,CIRCULAR,PERFECT_EXT,UNAMBIGUOUS_BP
11	86011029	86031611	5circ_000166	29	-	12	29	40	40	T02	29	0	0	1	GTAG	NA	ANCHOR_UNIQUE,CANONICAL,CIRCULAR,PERFECT_EXT,UNAMBIGUOUS_BP
22	26457858	26458577	5circ_000167	79	-	20	79	40	40	T02	79	0	0	1	GTAG	NA	ANCHOR_UNIQUE,CANONICAL,CIRCULAR,PERFECT_EXT,UNAMBIGUOUS_BP
2	54038211	54051050	5circ_000168	3	+	1	3	35	5	T02	3	0	0	1	GTAG	NA	ANCHOR_UNIQUE,CANONICAL,CIRCULAR,PERFECT_EXT,UNAMBIGUOUS_BP
3	3156218	3174261	5circ_000169	5	-	1	5	40	40	T02	5	1	0	1	GTAG	NA	ANCHOR_UNIQUE,CANONICAL,CIRCULAR,GOOD_EXT,UNAMBIGUOUS_BP
12	1754257	1772961	5circ_000170	3	+	1	3	5	40	T02	3	0	0	1	GTAG	NA	ANCHOR_UNIQUE,CANONICAL,CIRCULAR,PERFECT_EXT,UNAMBIGUOUS_BP
17	62010549	62035608	5circ_000171	2	-	1	2	35	5	T02	2	0	0	1	GTAG	NA	ANCHOR_UNIQUE,CANONICAL,CIRCULAR,PERFECT_EXT,UNAMBIGUOUS_BP
1	154249238	154251653	5circ_000172	30	+	8	30	40	40	T02	30	0	0	1	GTAG	NA	ANCHOR_UNIQUE,CANONICAL,CIRCULAR,PERFECT_EXT,UNAMBIGUOUS_BP
1	28473553	28476291	5circ_000173	9	+	7	9	40	40	T02	9	0	0	1	GTAG	NA	ANCHOR_UNIQUE,CANONICAL,CIRCULAR,PERFECT_EXT,UNAMBIGUOUS_BP
10	16668436	16670172	5circ_000176	2	-	1	2	5	40	T02	2	0	0	1	GTAG	NA	ANCHOR_UNIQUE,CANONICAL,CIRCULAR,PERFECT_EXT,UNAMBIGUOUS_BP
17	44250390	44253156	5circ_000178	2	-	1	2	40	40	T02	2	2	0	1	GTAG	NA	ANCHOR_UNIQUE,CANONICAL,CIRCULAR,OK_EXT,UNAMBIGUOUS_BP
20	49864727	49884066	5circ_000179	2	+	1	2	5	40	T02	2	0	0	1	GTAG	NA	ANCHOR_UNIQUE,CANONICAL,CIRCULAR,PERFECT_EXT,UNAMBIGUOUS_BP
17	74695061	74698481	5circ_000180	10	-	4	10	40	40	T02	10	0	0	1	GTAG	NA	ANCHOR_UNIQUE,CANONICAL,CIRCULAR,PERFECT_EXT,UNAMBIGUOUS_BP
16	68808423	68829797	5circ_000181	4	+	1	4	40	40	T02	4	0	0	1	GTAG	NA	ANCHOR_UNIQUE,CANONICAL,CIRCULAR,PERFECT_EXT,UNAMBIGUOUS_BP
12	124466172	124486568	5circ_000182	6	-	1	6	40	40	T02	6	0	0	1	GTAG	NA	ANCHOR_UNIQUE,CANONICAL,CIRCULAR,PERFECT_EXT,UNAMBIGUOUS_BP
7	106097689	106099282	5circ_000183	20	-	7	20	40	40	T02	20	0	0	1	GTAG	NA	ANCHOR_UNIQUE,CANONICAL,CIRCULAR,PERFECT_EXT,UNAMBIGUOUS_BP
12	121743628	121761738	5circ_000186	12	+	2	12	40	40	T02	12	0	0	1	GTAG	NA	ANCHOR_UNIQUE,CANONICAL,CIRCULAR,PERFECT_EXT,UNAMBIGUOUS_BP
14	49650264	49655843	5circ_000187	6	-	2	6	40	40	T02	6	0	0	1	GTAG	NA	ANCHOR_UNIQUE,CANONICAL,CIRCULAR,PERFECT_EXT,UNAMBIGUOUS_BP
X	17703465	17703701	5circ_000188	3	+	1	3	40	40	T02	3	1	0	1	GTAG	NA	ANCHOR_UNIQUE,CANONICAL,CIRCULAR,GOOD_EXT,UNAMBIGUOUS_BP
16	71658232	71679535	5circ_000189	12	-	11	10	40	40	T02	12	0	0	1	GTAG	NA	ANCHOR_UNIQUE,CANONICAL,CIRCULAR,PERFECT_EXT,UNAMBIGUOUS_BP
9	136446854	136448161	5circ_000191	5	-	1	5	5	5	T02	5	0	0	1	GTAG	NA	ANCHOR_UNIQUE,CANONICAL,CIRCULAR,PERFECT_EXT,UNAMBIGUOUS_BP
3	9689963	9702064	5circ_000192	47	+	12	40	40	40	T02	47	0	0	1	GTAG	NA	ANCHOR_UNIQUE,CANONICAL,CIRCULAR,PERFECT_EXT,UNAMBIGUOUS_BP
11	5225496	5227024	5circ_000193	2	+	2	2	40	5	T02	2	0	0	1	GTAG	NA	ANCHOR_UNIQUE,CANONICAL,CIRCULAR,PERFECT_EXT,UNAMBIGUOUS_BP
9	19350701	19352693	5circ_000194	20	+	2	20	40	40	T02	20	0	0	1	GTAG	NA	ANCHOR_UNIQUE,CANONICAL,CIRCULAR,PERFECT_EXT,UNAMBIGUOUS_BP
18	46556906	46557074	5circ_000195	4	-	1	4	40	5	T02	4	2	0	1	GTAG	NA	ANCHOR_UNIQUE,CANONICAL,CIRCULAR,OK_EXT,UNAMBIGUOUS_BP
10	86472207	86473973	5circ_000196	2	-	1	2	40	5	T02	2	0	0	1	GTAG	NA	ANCHOR_UNIQUE,CANONICAL,CIRCULAR,PERFECT_EXT,UNAMBIGUOUS_BP
3	125489407	125504744	5circ_000198	10	-	3	10	5	40	T02	10	0	0	1	GTAG	NA	ANCHOR_UNIQUE,CANONICAL,CIRCULAR,PERFECT_EXT,UNAMBIGUOUS_BP
15	64921920	64931585	5circ_000199	3	+	2	3	40	40	T02	3	0	0	1	GTAG	NA	ANCHOR_UNIQUE,CANONICAL,CIRCULAR,PERFECT_EXT,UNAMBIGUOUS_BP
9	20923659	20933132	5circ_000200	6	+	2	6	35	40	T02	6	0	0	1	GTAG	NA	ANCHOR_UNIQUE,CANONICAL,CIRCULAR,PERFECT_EXT,UNAMBIGUOUS_BP
12	11047019	11121180	5circ_000201	3	-	3	2	5	5	T02	3	0	0	1	GTAG	NA	ANCHOR_UNIQUE,CANONICAL,CIRCULAR,PERFECT_EXT,UNAMBIGUOUS_BP
22	32498223	32498515	5circ_000204	3	-	1	3	40	40	T02	3	2	0	1	GTAG	NA	ANCHOR_UNIQUE,CANONICAL,CIRCULAR,OK_EXT,UNAMBIGUOUS_BP
9	98018272	98026451	5circ_000205	2	+	1	2	5	5	T02	2	0	0	1	GTAG	NA	ANCHOR_UNIQUE,CANONICAL,CIRCULAR,PERFECT_EXT,UNAMBIGUOUS_BP
2	202952558	202955758	5circ_000207	12	+	5	12	40	40	T02	12	0	0	1	GTAG	NA	ANCHOR_UNIQUE,CANONICAL,CIRCULAR,PERFECT_EXT,UNAMBIGUOUS_BP
4	109468402	109473186	5circ_000208	2	+	2	2	5	40	T02	2	0	0	1	GTAG	NA	ANCHOR_UNIQUE,CANONICAL,CIRCULAR,PERFECT_EXT,UNAMBIGUOUS_BP
9	136224006	136226874	5circ_000210	14	-	6	13	40	40	T02	14	0	0	1	GTAG	NA	ANCHOR_UNIQUE,CANONICAL,CIRCULAR,PERFECT_EXT,UNAMBIGUOUS_BP
1	95143890	95151419	5circ_000211	1931	+	254	1274	40	40	T02	1931	0	0	1	GTAG	NA	ANCHOR_UNIQUE,CANONICAL,CIRCULAR,PERFECT_EXT,UNAMBIGUOUS_BP
5	157359004	157361598	5circ_000212	7	+	3	7	40	5	T02	7	0	0	1	GTAG	NA	ANCHOR_UNIQUE,CANONICAL,CIRCULAR,PERFECT_EXT,UNAMBIGUOUS_BP
17	78079394	78087093	5circ_000213	10	+	3	10	40	5	T02	10	0	0	1	GTAG	NA	ANCHOR_UNIQUE,CANONICAL,CIRCULAR,PERFECT_EXT,UNAMBIGUOUS_BP
14	31122913	31133675	5circ_000214	2	-	1	2	40	40	T02	2	0	0	1	GTAG	NA	ANCHOR_UNIQUE,CANONICAL,CIRCULAR,PERFECT_EXT,UNAMBIGUOUS_BP
6	157454058	157456210	5circ_000215	3	+	3	2	40	4	T02	3	0	0	1	GTAG	NA	ANCHOR_UNIQUE,CANONICAL,CIRCULAR,PERFECT_EXT,UNAMBIGUOUS_BP
19	46838053	46839578	5circ_000216	4	-	1	4	5	40	T02	4	0	0	1	GTAG	NA	ANCHOR_UNIQUE,CANONICAL,CIRCULAR,PERFECT_EXT,UNAMBIGUOUS_BP
12	111658735	111665787	5circ_000217	3	-	1	3	40	40	T02	3	0	0	1	GTAG	NA	ANCHOR_UNIQUE,CANONICAL,CIRCULAR,PERFECT_EXT,UNAMBIGUOUS_BP
5	73051348	73077493	5circ_000218	10	+	2	10	5	5	T02	10	0	0	1	GTAG	NA	ANCHOR_UNIQUE,CANONICAL,CIRCULAR,PERFECT_EXT,UNAMBIGUOUS_BP
11	1286001	1295794	5circ_000219	18	-	6	17	40	40	T02	18	0	0	1	GTAG	NA	ANCHOR_UNIQUE,CANONICAL,CIRCULAR,PERFECT_EXT,UNAMBIGUOUS_BP
21	36356619	36364259	5circ_000220	2	+	1	2	5	40	T02	2	0	0	1	GTAG	NA	ANCHOR_UNIQUE,CANONICAL,CIRCULAR,PERFECT_EXT,UNAMBIGUOUS_BP
16	11698124	11736233	5circ_000221	6	-	2	6	40	40	T02	6	0	0	1	GTAG	NA	ANCHOR_UNIQUE,CANONICAL,CIRCULAR,PERFECT_EXT,UNAMBIGUOUS_BP
7	100591666	100594541	5circ_000223	2	+	2	2	40	40	T02	2	0	0	1	GTAG	NA	ANCHOR_UNIQUE,CANONICAL,CIRCULAR,PERFECT_EXT,UNAMBIGUOUS_BP
4	153596257	153604430	5circ_000224	3	+	2	2	40	5	T02	3	0	0	1	GTAG	NA	ANCHOR_UNIQUE,CANONICAL,CIRCULAR,PERFECT_EXT,UNAMBIGUOUS_BP
2	175097443	175121540	5circ_000225	4	-	4	4	40	40	T02	4	0	0	1	GTAG	NA	ANCHOR_UNIQUE,CANONICAL,CIRCULAR,PERFECT_EXT,UNAMBIGUOUS_BP
4	184659339	184685684	5circ_000227	7	+	1	7	40	40	T02	7	0	0	1	GTAG	NA	ANCHOR_UNIQUE,CANONICAL,CIRCULAR,PERFECT_EXT,UNAMBIGUOUS_BP
Y	20507351	20521300	5circ_000228	13	-	6	13	40	40	T02	13	0	0	1	GTAG	NA	ANCHOR_UNIQUE,CANONICAL,CIRCULAR,PERFECT_EXT,UNAMBIGUOUS_BP
11	118583178	118584644	5circ_000231	4	+	3	4	40	40	T02	4	0	0	1	GTAG	NA	ANCHOR_UNIQUE,CANONICAL,CIRCULAR,PERFECT_EXT,UNAMBIGUOUS_BP
1	65379401	65395032	5circ_000232	2	+	1	2	5	35	T02	2	0	0	1	GTAG	NA	ANCHOR_UNIQUE,CANONICAL,CIRCULAR,PERFECT_EXT,UNAMBIGUOUS_BP
9	68727595	68732682	5circ_000233	4	+	3	3	5	40	T02	4	0	0	1	GTAG	NA	ANCHOR_UNIQUE,CANONICAL,CIRCULAR,PERFECT_EXT,UNAMBIGUOUS_BP
21	29489004	29489354	5circ_000234	2	-	1	2	40	40	T02	2	1	0	1	GTAG	NA	ANCHOR_UNIQUE,CANONICAL,CIRCULAR,GOOD_EXT,UNAMBIGUOUS_BP
2	239156651	239163923	5circ_000235	2	-	2	2	40	40	T02	2	0	0	1	GTAG	NA	ANCHOR_UNIQUE,CANONICAL,CIRCULAR,PERFECT_EXT,UNAMBIGUOUS_BP
7	76432926	76433647	5circ_000236	8	+	2	8	40	40	T02	8	0	0	1	GTAG	NA	ANCHOR_UNIQUE,CANONICAL,CIRCULAR,PERFECT_EXT,UNAMBIGUOUS_BP
1	203720548	203722689	5circ_000237	7	+	4	7	40	40	T02	7	0	0	1	GTAG	NA	ANCHOR_UNIQUE,CANONICAL,CIRCULAR,PERFECT_EXT,UNAMBIGUOUS_BP
2	119900717	119934958	5circ_000238	5	+	3	5	5	40	T02	5	0	0	1	GTAG	NA	ANCHOR_UNIQUE,CANONICAL,CIRCULAR,PERFECT_EXT,UNAMBIGUOUS_BP
3	171123595	171128878	5circ_000240	3	-	1	3	40	40	T02	3	0	0	1	GTAG	NA	ANCHOR_UNIQUE,CANONICAL,CIRCULAR,PERFECT_EXT,UNAMBIGUOUS_BP
20	59773278	59774490	5circ_000241	4	+	1	4	40	40	T02	4	1	0	1	GTAG	NA	ANCHOR_UNIQUE,CANONICAL,CIRCULAR,GOOD_EXT,UNAMBIGUOUS_BP
3	129458598	129464781	5circ_000242	12	+	4	12	40	40	T02	12	0	0	1	GTAG	NA	ANCHOR_UNIQUE,CANONICAL,CIRCULAR,PERFECT_EXT,UNAMBIGUOUS_BP
15	89860922	89889140	5circ_000243	8	-	2	8	40	40	T02	8	0	0	1	GTAG	NA	ANCHOR_UNIQUE,CANONICAL,CIRCULAR,PERFECT_EXT,UNAMBIGUOUS_BP
1	32938396	32949774	5circ_000244	2	-	2	2	5	40	T02	2	0	0	1	GTAG	NA	ANCHOR_UNIQUE,CANONICAL,CIRCULAR,PERFECT_EXT,UNAMBIGUOUS_BP
12	26979783	26983596	5circ_000245	4	-	2	4	5	40	T02	4	0	0	1	GTAG	NA	ANCHOR_UNIQUE,CANONICAL,CIRCULAR,PERFECT_EXT,UNAMBIGUOUS_BP
11	121488031	121497049	5circ_000246	13	+	4	13	40	5	T02	13	0	0	1	GTAG	NA	ANCHOR_UNIQUE,CANONICAL,CIRCULAR,PERFECT_EXT,UNAMBIGUOUS_BP
14	22926132	22927660	5circ_000247	18	-	6	18	40	40	T02	18	0	0	1	GTAG	NA	ANCHOR_UNIQUE,CANONICAL,CIRCULAR,PERFECT_EXT,UNAMBIGUOUS_BP
15	65752378	65761438	5circ_000248	21	-	12	21	40	40	T02	21	0	0	1	GTAG	NA	ANCHOR_UNIQUE,CANONICAL,CIRCULAR,PERFECT_EXT,UNAMBIGUOUS_BP
9	36356302	36357942	5circ_000249	14	-	5	14	40	5	T02	14	0	0	1	GTAG	NA	ANCHOR_UNIQUE,CANONICAL,CIRCULAR,PERFECT_EXT,UNAMBIGUOUS_BP
19	11337171	11337460	5circ_000250	2	-	1	2	5	5	T02	2	0	0	1	GTAG	NA	ANCHOR_UNIQUE,CANONICAL,CIRCULAR,PERFECT_EXT,UNAMBIGUOUS_BP
16	11691289	11692082	5circ_000253	2	-	1	2	5	5	T02	2	0	0	1	GTAG	NA	ANCHOR_UNIQUE,CANONICAL,CIRCULAR,PERFECT_EXT,UNAMBIGUOUS_BP
6	118448403	118449870	5circ_000254	9	-	1	9	5	40	T02	9	1	0	1	GTAG	NA	ANCHOR_UNIQUE,CANONICAL,CIRCULAR,GOOD_EXT,UNAMBIGUOUS_BP
2	119926597	119945240	5circ_000255	4	+	4	4	40	40	T02	4	0	0	1	GTAG	NA	ANCHOR_UNIQUE,CANONICAL,CIRCULAR,PERFECT_EXT,UNAMBIGUOUS_BP
17	82478570	82481211	5circ_000256	5	+	1	5	40	40	T02	5	0	0	1	GTAG	NA	ANCHOR_UNIQUE,CANONICAL,CIRCULAR,PERFECT_EXT,UNAMBIGUOUS_BP
11	57409174	57426352	5circ_000259	8	-	2	8	5	40	T02	8	0	0	1	GTAG	NA	ANCHOR_UNIQUE,CANONICAL,CIRCULAR,PERFECT_EXT,UNAMBIGUOUS_BP
15	42966152	42970607	5circ_000261	4	-	1	4	40	40	T02	4	0	0	1	GTAG	NA	ANCHOR_UNIQUE,CANONICAL,CIRCULAR,PERFECT_EXT,UNAMBIGUOUS_BP
1	151024610	151025673	5circ_000262	38	+	13	36	40	40	T02	38	0	0	1	GTAG	NA	ANCHOR_UNIQUE,CANONICAL,CIRCULAR,PERFECT_EXT,UNAMBIGUOUS_BP
20	47262287	47283648	5circ_000264	14	-	6	13	40	40	T02	14	0	0	1	GTAG	NA	ANCHOR_UNIQUE,CANONICAL,CIRCULAR,PERFECT_EXT,UNAMBIGUOUS_BP
2	219210229	219217807	5circ_000265	2	-	1	2	40	40	T02	2	0	1	1	GTAG	NA	ANCHOR_UNIQUE,CANONICAL,CIRCULAR,GOOD_EXT,UNAMBIGUOUS_BP
11	77683709	77693611	5circ_000266	7	-	3	4	40	35	T02	7	0	0	1	GTAG	NA	ANCHOR_UNIQUE,CANONICAL,CIRCULAR,PERFECT_EXT,UNAMBIGUOUS_BP
16	67744287	67772086	5circ_000267	6	-	4	6	40	40	T02	6	0	0	1	GTAG	NA	ANCHOR_UNIQUE,CANONICAL,CIRCULAR,PERFECT_EXT,UNAMBIGUOUS_BP
12	89620203	89635167	5circ_000269	3	-	1	3	40	40	T02	3	0	0	1	GTAG	NA	ANCHOR_UNIQUE,CANONICAL,CIRCULAR,PERFECT_EXT,UNAMBIGUOUS_BP
6	156967994	156984401	5circ_000270	3	+	1	3	40	5	T02	3	0	0	1	GTAG	NA	ANCHOR_UNIQUE,CANONICAL,CIRCULAR,PERFECT_EXT,UNAMBIGUOUS_BP
9	17309057	17342444	5circ_000272	7	+	3	7	40	5	T02	7	0	0	1	GTAG	NA	ANCHOR_UNIQUE,CANONICAL,CIRCULAR,PERFECT_EXT,UNAMBIGUOUS_BP
16	68157868	68167015	5circ_000273	13	+	2	13	40	40	T02	13	0	0	1	GTAG	NA	ANCHOR_UNIQUE,CANONICAL,CIRCULAR,PERFECT_EXT,UNAMBIGUOUS_BP
15	89113724	89155534	5circ_000276	9	+	3	9	40	40	T02	9	0	0	1	GTAG	NA	ANCHOR_UNIQUE,CANONICAL,CIRCULAR,PERFECT_EXT,UNAMBIGUOUS_BP
13	95170531	95188542	5circ_000277	4	-	2	4	5	40	T02	4	0	0	1	GTAG	NA	ANCHOR_UNIQUE,CANONICAL,CIRCULAR,PERFECT_EXT,UNAMBIGUOUS_BP
2	42704196	42709096	5circ_000278	6	+	3	6	40	5	T02	6	0	0	1	GTAG	NA	ANCHOR_UNIQUE,CANONICAL,CIRCULAR,PERFECT_EXT,UNAMBIGUOUS_BP
12	1777853	1784073	5circ_000280	28	+	14	28	40	40	T02	28	0	0	1	GTAG	NA	ANCHOR_UNIQUE,CANONICAL,CIRCULAR,PERFECT_EXT,UNAMBIGUOUS_BP
17	68385063	68401450	5circ_000281	2	+	2	2	40	5	T02	2	0	0	1	GTAG	NA	ANCHOR_UNIQUE,CANONICAL,CIRCULAR,PERFECT_EXT,UNAMBIGUOUS_BP
1	160323430	160332557	5circ_000282	16	-	5	16	40	40	T02	16	0	0	1	GTAG	NA	ANCHOR_UNIQUE,CANONICAL,CIRCULAR,PERFECT_EXT,UNAMBIGUOUS_BP
4	36343501	36343866	5circ_000283	12	+	3	12	40	5	T02	12	0	0	1	GTAG	NA	ANCHOR_UNIQUE,CANONICAL,CIRCULAR,PERFECT_EXT,UNAMBIGUOUS_BP
15	40751425	40752178	5circ_000284	4	-	1	4	5	5	T02	4	0	0	1	GTAG	NA	ANCHOR_UNIQUE,CANONICAL,CIRCULAR,PERFECT_EXT,UNAMBIGUOUS_BP
1	153665219	153668557	5circ_000286	5	-	1	5	40	40	T02	5	0	0	1	GTAG	NA	ANCHOR_UNIQUE,CANONICAL,CIRCULAR,PERFECT_EXT,UNAMBIGUOUS_BP
13	21157921	21172681	5circ_000288	9	-	2	9	40	5	T02	9	1	0	1	GTAG	NA	ANCHOR_UNIQUE,CANONICAL,CIRCULAR,GOOD_EXT,UNAMBIGUOUS_BP
22	46792519	46797620	5circ_000289	3	+	2	3	40	40	T02	3	0	0	1	GTAG	NA	ANCHOR_UNIQUE,CANONICAL,CIRCULAR,PERFECT_EXT,UNAMBIGUOUS_BP
16	68121986	68123121	5circ_000290	107	+	36	100	40	40	T02	107	0	0	1	GTAG	NA	ANCHOR_UNIQUE,CANONICAL,CIRCULAR,PERFECT_EXT,UNAMBIGUOUS_BP
5	177247923	177251853	5circ_000291	4	+	2	4	40	40	T02	4	0	0	1	GTAG	NA	ANCHOR_UNIQUE,CANONICAL,CIRCULAR,PERFECT_EXT,UNAMBIGUOUS_BP
2	99449335	99464985	5circ_000292	5	-	4	5	40	40	T02	5	0	0	1	GTAG	NA	ANCHOR_UNIQUE,CANONICAL,CIRCULAR,PERFECT_EXT,UNAMBIGUOUS_BP
4	38035587	38054338	5circ_000294	2	+	2	2	5	40	T02	2	0	0	1	GTAG	NA	ANCHOR_UNIQUE,CANONICAL,CIRCULAR,PERFECT_EXT,UNAMBIGUOUS_BP
5	35694287	35705808	5circ_000295	3	+	2	3	40	5	T02	3	0	0	1	GTAG	NA	ANCHOR_UNIQUE,CANONICAL,CIRCULAR,PERFECT_EXT,UNAMBIGUOUS_BP
21	46301996	46318961	5circ_000296	3	-	1	3	5	40	T02	3	0	0	1	GTAG	NA	ANCHOR_UNIQUE,CANONICAL,CIRCULAR,PERFECT_EXT,UNAMBIGUOUS_BP
17	43099774	43104956	5circ_000298	4	-	1	4	40	5	T02	4	0	0	1	GTAG	NA	ANCHOR_UNIQUE,CANONICAL,CIRCULAR,PERFECT_EXT,UNAMBIGUOUS_BP
10	69368535	69369624	5circ_000299	3	+	1	3	40	5	T02	3	0	0	1	GTAG	NA	ANCHOR_UNIQUE,CANONICAL,CIRCULAR,PERFECT_EXT,UNAMBIGUOUS_BP
10	119038237	119038439	5circ_000300	2	-	2	2	5	40	T02	2	0	0	1	GTAG	NA	ANCHOR_UNIQUE,CANONICAL,CIRCULAR,PERFECT_EXT,UNAMBIGUOUS_BP
11	65581057	65581373	5circ_000301	2	+	1	2	35	40	T02	2	0	0	1	GTAG	NA	ANCHOR_UNIQUE,CANONICAL,CIRCULAR,PERFECT_EXT,UNAMBIGUOUS_BP
4	158237524	158244349	5circ_000302	2	+	2	2	40	40	T02	2	0	0	1	GTAG	NA	ANCHOR_UNIQUE,CANONICAL,CIRCULAR,PERFECT_EXT,UNAMBIGUOUS_BP
X	119406459	119410362	5circ_000303	2	+	1	2	40	5	T02	2	0	0	1	GTAG	NA	ANCHOR_UNIQUE,CANONICAL,CIRCULAR,PERFECT_EXT,UNAMBIGUOUS_BP
16	21612644	21625115	5circ_000305	13	+	5	13	40	40	T02	13	0	0	1	GTAG	NA	ANCHOR_UNIQUE,CANONICAL,CIRCULAR,PERFECT_EXT,UNAMBIGUOUS_BP
1	234418083	234427766	5circ_000306	3	-	2	2	5	40	T02	3	0	0	1	GTAG	NA	ANCHOR_UNIQUE,CANONICAL,CIRCULAR,PERFECT_EXT,UNAMBIGUOUS_BP
2	25799384	25878298	5circ_000307	3	-	2	3	40	40	T02	3	0	0	1	GTAG	NA	ANCHOR_UNIQUE,CANONICAL,CIRCULAR,PERFECT_EXT,UNAMBIGUOUS_BP
10	110944242	110985765	5circ_000308	3	+	2	2	5	40	T02	3	0	0	1	GTAG	NA	ANCHOR_UNIQUE,CANONICAL,CIRCULAR,PERFECT_EXT,UNAMBIGUOUS_BP
20	37207272	37210165	5circ_000310	5	+	3	5	40	40	T02	5	0	0	1	GTAG	NA	ANCHOR_UNIQUE,CANONICAL,CIRCULAR,PERFECT_EXT,UNAMBIGUOUS_BP
17	78803384	78803978	5circ_000311	6	-	1	6	40	40	T02	6	0	0	1	GTAG	NA	ANCHOR_UNIQUE,CANONICAL,CIRCULAR,PERFECT_EXT,UNAMBIGUOUS_BP
5	131395562	131408207	5circ_000312	2	-	1	2	5	5	T02	2	0	0	1	GTAG	NA	ANCHOR_UNIQUE,CANONICAL,CIRCULAR,PERFECT_EXT,UNAMBIGUOUS_BP
14	67685014	67692593	5circ_000313	5	-	1	5	40	40	T02	5	0	0	1	GTAG	NA	ANCHOR_UNIQUE,CANONICAL,CIRCULAR,PERFECT_EXT,UNAMBIGUOUS_BP
5	154376276	154380631	5circ_000314	10	+	2	10	40	40	T02	10	0	0	1	GTAG	NA	ANCHOR_UNIQUE,CANONICAL,CIRCULAR,PERFECT_EXT,UNAMBIGUOUS_BP
1	93567278	93567851	5circ_000315	2	-	2	2	40	40	T02	2	0	0	1	GTAG	NA	ANCHOR_UNIQUE,CANONICAL,CIRCULAR,PERFECT_EXT,UNAMBIGUOUS_BP
X	101020486	101038051	5circ_000316	2	-	1	2	40	5	T02	2	0	0	1	GTAG	NA	ANCHOR_UNIQUE,CANONICAL,CIRCULAR,PERFECT_EXT,UNAMBIGUOUS_BP
17	17884633	17893810	5circ_000317	4	-	2	4	40	40	T02	4	0	0	1	GTAG	NA	ANCHOR_UNIQUE,CANONICAL,CIRCULAR,PERFECT_EXT,UNAMBIGUOUS_BP
11	85981918	85990378	5circ_000318	3	-	1	3	5	40	T02	3	0	0	1	GTAG	NA	ANCHOR_UNIQUE,CANONICAL,CIRCULAR,PERFECT_EXT,UNAMBIGUOUS_BP
16	70512238	70514509	5circ_000319	7	-	1	7	5	5	T02	7	0	0	1	GTAG	NA	ANCHOR_UNIQUE,CANONICAL,CIRCULAR,PERFECT_EXT,UNAMBIGUOUS_BP
2	171448680	171469030	5circ_000320	8	+	3	8	40	40	T02	8	0	0	1	GTAG	NA	ANCHOR_UNIQUE,CANONICAL,CIRCULAR,PERFECT_EXT,UNAMBIGUOUS_BP
5	40852173	40854096	5circ_000321	4	+	1	4	5	40	T02	4	0	0	1	GTAG	NA	ANCHOR_UNIQUE,CANONICAL,CIRCULAR,PERFECT_EXT,UNAMBIGUOUS_BP
7	131387119	131399433	5circ_000323	41	+	16	39	40	40	T02	41	0	0	1	GTAG	NA	ANCHOR_UNIQUE,CANONICAL,CIRCULAR,PERFECT_EXT,UNAMBIGUOUS_BP
3	121449314	121487509	5circ_000324	4	-	2	4	40	5	T02	4	0	0	1	GTAG	NA	ANCHOR_UNIQUE,CANONICAL,CIRCULAR,PERFECT_EXT,UNAMBIGUOUS_BP
13	25312882	25315467	5circ_000325	3	+	1	3	40	40	T02	3	0	0	1	GTAG	NA	ANCHOR_UNIQUE,CANONICAL,CIRCULAR,PERFECT_EXT,UNAMBIGUOUS_BP
2	206144017	206152510	5circ_000326	6	-	3	6	40	40	T02	6	0	0	1	GTAG	NA	ANCHOR_UNIQUE,CANONICAL,CIRCULAR,PERFECT_EXT,UNAMBIGUOUS_BP
3	196053417	196060247	5circ_000328	2	-	1	2	40	40	T02	2	0	0	1	GTAG	NA	ANCHOR_UNIQUE,CANONICAL,CIRCULAR,PERFECT_EXT,UNAMBIGUOUS_BP
5	103096540	103097781	5circ_000329	9	-	3	6	40	40	T02	9	0	0	1	GTAG	NA	ANCHOR_UNIQUE,CANONICAL,CIRCULAR,PERFECT_EXT,UNAMBIGUOUS_BP
5	140485588	140487060	5circ_000330	2	+	1	2	5	5	T02	2	0	0	1	GTAG	NA	ANCHOR_UNIQUE,CANONICAL,CIRCULAR,PERFECT_EXT,UNAMBIGUOUS_BP
14	50129960	50130762	5circ_000331	4	-	1	4	40	35	T02	4	0	0	1	GTAG	NA	ANCHOR_UNIQUE,CANONICAL,CIRCULAR,PERFECT_EXT,UNAMBIGUOUS_BP
2	32439507	32441462	5circ_000332	10	+	2	10	40	40	T02	10	0	0	1	GTAG	NA	ANCHOR_UNIQUE,CANONICAL,CIRCULAR,PERFECT_EXT,UNAMBIGUOUS_BP
20	41112781	41115439	5circ_000333	3	+	1	3	40	5	T02	3	0	0	1	GTAG	NA	ANCHOR_UNIQUE,CANONICAL,CIRCULAR,PERFECT_EXT,UNAMBIGUOUS_BP
5	137985256	137988315	5circ_000334	4	-	2	4	40	5	T02	4	0	0	1	GTAG	NA	ANCHOR_UNIQUE,CANONICAL,CIRCULAR,PERFECT_EXT,UNAMBIGUOUS_BP
16	67628369	67629533	5circ_000335	17	+	9	17	40	40	T02	17	0	0	1	GTAG	NA	ANCHOR_UNIQUE,CANONICAL,CIRCULAR,PERFECT_EXT,UNAMBIGUOUS_BP
4	9980591	9996941	5circ_000339	4	-	2	3	37	5	T02	4	0	0	1	GTAG	NA	ANCHOR_UNIQUE,CANONICAL,CIRCULAR,PERFECT_EXT,UNAMBIGUOUS_BP
12	3821872	3863957	5circ_000341	3	-	2	2	40	40	T02	3	0	0	1	GTAG	NA	ANCHOR_UNIQUE,CANONICAL,CIRCULAR,PERFECT_EXT,UNAMBIGUOUS_BP
1	46033801	46034266	5circ_000342	4	+	1	4	35	40	T02	4	1	0	1	GTAG	NA	ANCHOR_UNIQUE,CANONICAL,CIRCULAR,GOOD_EXT,UNAMBIGUOUS_BP
16	29833732	29834066	5circ_000344	49	+	19	49	40	40	T02	49	0	0	1	GTAG	NA	ANCHOR_UNIQUE,CANONICAL,CIRCULAR,PERFECT_EXT,UNAMBIGUOUS_BP
18	76871700	76881512	5circ_000347	3	+	1	3	40	40	T02	3	0	0	1	GTAG	NA	ANCHOR_UNIQUE,CANONICAL,CIRCULAR,PERFECT_EXT,UNAMBIGUOUS_BP
16	88027482	88038011	5circ_000350	31	+	10	28	40	5	T02	31	1	0	1	GTAG	NA	ANCHOR_UNIQUE,CANONICAL,CIRCULAR,GOOD_EXT,UNAMBIGUOUS_BP
21	39206107	39229436	5circ_000351	3	-	2	3	40	40	T02	3	0	0	1	GTAG	NA	ANCHOR_UNIQUE,CANONICAL,CIRCULAR,PERFECT_EXT,UNAMBIGUOUS_BP
7	117098612	117099844	5circ_000353	5	+	2	5	40	40	T02	5	0	0	1	GTAG	NA	ANCHOR_UNIQUE,CANONICAL,CIRCULAR,PERFECT_EXT,UNAMBIGUOUS_BP
1	155016409	155016841	5circ_000354	3	-	1	3	40	40	T02	3	2	0	1	GTAG	NA	ANCHOR_UNIQUE,CANONICAL,CIRCULAR,OK_EXT,UNAMBIGUOUS_BP
21	33340998	33349543	5circ_000355	6	+	2	6	40	40	T02	6	0	0	1	GTAG	NA	ANCHOR_UNIQUE,CANONICAL,CIRCULAR,PERFECT_EXT,UNAMBIGUOUS_BP
10	89017650	89035982	5circ_000356	5	+	1	5	5	5	T02	5	2	0	1	GTAG	NA	ANCHOR_UNIQUE,CANONICAL,CIRCULAR,OK_EXT,UNAMBIGUOUS_BP
17	44287929	44288096	5circ_000357	2	-	2	2	5	40	T02	2	0	0	1	GTAG	NA	ANCHOR_UNIQUE,CANONICAL,CIRCULAR,PERFECT_EXT,UNAMBIGUOUS_BP
6	110446872	110457017	5circ_000358	4	-	4	4	40	40	T02	4	0	0	1	GTAG	NA	ANCHOR_UNIQUE,CANONICAL,CIRCULAR,PERFECT_EXT,UNAMBIGUOUS_BP
14	102376649	102414793	5circ_000359	2	+	2	2	40	40	T02	2	0	0	1	GTAG	NA	ANCHOR_UNIQUE,CANONICAL,CIRCULAR,PERFECT_EXT,UNAMBIGUOUS_BP
10	86451966	86473973	5circ_000361	3	-	1	3	5	5	T02	3	0	0	1	GTAG	NA	ANCHOR_UNIQUE,CANONICAL,CIRCULAR,PERFECT_EXT,UNAMBIGUOUS_BP
3	151214002	151219642	5circ_000362	6	-	2	6	40	40	T02	6	0	0	1	GTAG	NA	ANCHOR_UNIQUE,CANONICAL,CIRCULAR,PERFECT_EXT,UNAMBIGUOUS_BP
20	34438473	34440344	5circ_000363	7	+	2	7	40	35	T02	7	0	0	1	GTAG	NA	ANCHOR_UNIQUE,CANONICAL,CIRCULAR,PERFECT_EXT,UNAMBIGUOUS_BP
21	33345245	33349543	5circ_000364	2	+	1	2	5	5	T02	2	0	0	1	GTAG	NA	ANCHOR_UNIQUE,CANONICAL,CIRCULAR,PERFECT_EXT,UNAMBIGUOUS_BP
11	68569747	68576043	5circ_000366	2	+	1	2	35	40	T02	2	0	0	1	GTAG	NA	ANCHOR_UNIQUE,CANONICAL,CIRCULAR,PERFECT_EXT,UNAMBIGUOUS_BP
16	71678754	71681905	5circ_000367	127	-	44	127	40	40	T02	127	0	0	1	GTAG	NA	ANCHOR_UNIQUE,CANONICAL,CIRCULAR,PERFECT_EXT,UNAMBIGUOUS_BP
3	119843254	119905852	5circ_000368	3	-	1	3	40	40	T02	3	0	0	1	GTAG	NA	ANCHOR_UNIQUE,CANONICAL,CIRCULAR,PERFECT_EXT,UNAMBIGUOUS_BP
8	140585118	140605914	5circ_000369	347	-	86	325	40	40	T02	347	0	0	1	GTAG	NA	ANCHOR_UNIQUE,CANONICAL,CIRCULAR,PERFECT_EXT,UNAMBIGUOUS_BP
17	21006895	21012935	5circ_000371	4	-	2	4	40	40	T02	4	0	0	1	GTAG	NA	ANCHOR_UNIQUE,CANONICAL,CIRCULAR,PERFECT_EXT,UNAMBIGUOUS_BP
16	2328452	2329854	5circ_000372	10	-	4	8	40	40	T02	10	0	0	1	GTAG	NA	ANCHOR_UNIQUE,CANONICAL,CIRCULAR,PERFECT_EXT,UNAMBIGUOUS_BP
10	125794021	125794388	5circ_000373	8	-	2	8	40	5	T02	8	0	0	1	GTAG	NA	ANCHOR_UNIQUE,CANONICAL,CIRCULAR,PERFECT_EXT,UNAMBIGUOUS_BP
9	128508875	128515639	5circ_000374	15	+	6	15	40	40	T02	15	0	0	1	GTAG	NA	ANCHOR_UNIQUE,CANONICAL,CIRCULAR,PERFECT_EXT,UNAMBIGUOUS_BP
22	21788256	21805945	5circ_000375	3	-	1	3	40	40	T02	3	0	0	1	GTAG	NA	ANCHOR_UNIQUE,CANONICAL,CIRCULAR,PERFECT_EXT,UNAMBIGUOUS_BP
8	119783380	119791459	5circ_000380	9	-	3	9	40	40	T02	9	0	0	1	GTAG	NA	ANCHOR_UNIQUE,CANONICAL,CIRCULAR,PERFECT_EXT,UNAMBIGUOUS_BP
6	27892733	27893179	5circ_000381	3	+	1	3	5	40	T02	3	1	0	1	GTAG	NA	ANCHOR_UNIQUE,CANONICAL,CIRCULAR,GOOD_EXT,UNAMBIGUOUS_BP
22	40273424	40301333	5circ_000382	2	+	2	2	40	40	T02	2	0	0	1	GTAG	NA	ANCHOR_UNIQUE,CANONICAL,CIRCULAR,PERFECT_EXT,UNAMBIGUOUS_BP
7	44700140	44701615	5circ_000383	21	+	9	21	40	40	T02	21	0	0	1	GTAG	NA	ANCHOR_UNIQUE,CANONICAL,CIRCULAR,PERFECT_EXT,UNAMBIGUOUS_BP
18	12697222	12701113	5circ_000385	2	-	1	2	5	5	T02	2	0	0	1	GTAG	NA	ANCHOR_UNIQUE,CANONICAL,CIRCULAR,PERFECT_EXT,UNAMBIGUOUS_BP
3	142425221	142426841	5circ_000387	7	-	3	7	40	5	T02	7	0	0	1	GTAG	NA	ANCHOR_UNIQUE,CANONICAL,CIRCULAR,PERFECT_EXT,UNAMBIGUOUS_BP
10	124806830	124831463	5circ_000388	4	+	1	4	40	40	T02	4	0	0	1	GTAG	NA	ANCHOR_UNIQUE,CANONICAL,CIRCULAR,PERFECT_EXT,UNAMBIGUOUS_BP
7	138861138	138861456	5circ_000389	4	-	1	4	40	5	T02	4	0	0	1	GTAG	NA	ANCHOR_UNIQUE,CANONICAL,CIRCULAR,PERFECT_EXT,UNAMBIGUOUS_BP
3	171138190	171167270	5circ_000390	6	-	2	6	40	40	T02	6	0	0	1	GTAG	NA	ANCHOR_UNIQUE,CANONICAL,CIRCULAR,PERFECT_EXT,UNAMBIGUOUS_BP
3	123223558	123259589	5circ_000391	8	+	3	8	40	40	T02	8	0	0	1	GTAG	NA	ANCHOR_UNIQUE,CANONICAL,CIRCULAR,PERFECT_EXT,UNAMBIGUOUS_BP
10	68450027	68470163	5circ_000392	4	-	3	4	40	40	T02	4	0	0	1	GTAG	NA	ANCHOR_UNIQUE,CANONICAL,CIRCULAR,PERFECT_EXT,UNAMBIGUOUS_BP
2	196139619	196146055	5circ_000393	8	-	2	8	5	40	T02	8	0	0	1	GTAG	NA	ANCHOR_UNIQUE,CANONICAL,CIRCULAR,PERFECT_EXT,UNAMBIGUOUS_BP
11	4055525	4070203	5circ_000394	8	+	1	8	5	40	T02	8	0	0	1	GTAG	NA	ANCHOR_UNIQUE,CANONICAL,CIRCULAR,PERFECT_EXT,UNAMBIGUOUS_BP
8	21974673	21980203	5circ_000395	3	+	2	3	40	40	T02	3	0	0	1	GTAG	NA	ANCHOR_UNIQUE,CANONICAL,CIRCULAR,PERFECT_EXT,UNAMBIGUOUS_BP
15	65661841	65676564	5circ_000396	2	-	2	2	40	40	T02	2	0	0	1	GTAG	NA	ANCHOR_UNIQUE,CANONICAL,CIRCULAR,PERFECT_EXT,UNAMBIGUOUS_BP
7	103115059	103128792	5circ_000397	3	-	1	3	40	5	T02	3	0	0	1	GTAG	NA	ANCHOR_UNIQUE,CANONICAL,CIRCULAR,PERFECT_EXT,UNAMBIGUOUS_BP
6	158718086	158745658	5circ_000398	4	+	2	4	40	40	T02	4	0	0	1	GTAG	NA	ANCHOR_UNIQUE,CANONICAL,CIRCULAR,PERFECT_EXT,UNAMBIGUOUS_BP
20	32093862	32099135	5circ_000399	4	+	1	4	5	40	T02	4	0	0	1	GTAG	NA	ANCHOR_UNIQUE,CANONICAL,CIRCULAR,PERFECT_EXT,UNAMBIGUOUS_BP
2	68775220	68807480	5circ_000401	2	+	2	2	40	40	T02	2	0	0	1	GTAG	NA	ANCHOR_UNIQUE,CANONICAL,CIRCULAR,PERFECT_EXT,UNAMBIGUOUS_BP
19	2078139	2078679	5circ_000402	31	-	8	31	40	40	T02	31	0	0	1	GTAG	NA	ANCHOR_UNIQUE,CANONICAL,CIRCULAR,PERFECT_EXT,UNAMBIGUOUS_BP
7	105620199	105624267	5circ_000403	3	-	1	3	40	5	T02	3	0	0	1	GTAG	NA	ANCHOR_UNIQUE,CANONICAL,CIRCULAR,PERFECT_EXT,UNAMBIGUOUS_BP
11	16178045	16186955	5circ_000404	2	-	2	2	40	40	T02	2	1	0	1	GTAG	NA	ANCHOR_UNIQUE,CANONICAL,CIRCULAR,GOOD_EXT,UNAMBIGUOUS_BP
1	235757280	235770297	5circ_000405	2	-	1	2	40	40	T02	2	0	0	1	GTAG	NA	ANCHOR_UNIQUE,CANONICAL,CIRCULAR,PERFECT_EXT,UNAMBIGUOUS_BP
11	111836164	111838378	5circ_000406	3	-	2	3	40	40	T02	3	0	0	1	GTAG	NA	ANCHOR_UNIQUE,CANONICAL,CIRCULAR,PERFECT_EXT,UNAMBIGUOUS_BP
1	42926917	42927237	5circ_000408	2	+	2	2	40	5	T02	2	1	0	1	GTAG	NA	ANCHOR_UNIQUE,CANONICAL,CIRCULAR,GOOD_EXT,UNAMBIGUOUS_BP
19	11120091	11120522	5circ_000409	5	+	1	5	40	40	T02	5	0	0	1	GTAG	NA	ANCHOR_UNIQUE,CANONICAL,CIRCULAR,PERFECT_EXT,UNAMBIGUOUS_BP
13	46362537	46372597	5circ_000410	6	-	1	6	40	40	T02	6	0	0	1	GTAG	NA	ANCHOR_UNIQUE,CANONICAL,CIRCULAR,PERFECT_EXT,UNAMBIGUOUS_BP
16	71745143	71746692	5circ_000411	8	-	2	8	5	5	T02	8	0	0	1	GTAG	NA	ANCHOR_UNIQUE,CANONICAL,CIRCULAR,PERFECT_EXT,UNAMBIGUOUS_BP
1	211353238	211361162	5circ_000412	6	+	2	6	40	40	T02	6	0	0	1	GTAG	NA	ANCHOR_UNIQUE,CANONICAL,CIRCULAR,PERFECT_EXT,UNAMBIGUOUS_BP
22	43039779	43046573	5circ_000413	20	-	7	20	40	40	T02	20	1	0	1	GTAG	NA	ANCHOR_UNIQUE,CANONICAL,CIRCULAR,GOOD_EXT,UNAMBIGUOUS_BP
7	130026157	130041085	5circ_000414	2	-	1	2	40	40	T02	2	0	0	1	GTAG	NA	ANCHOR_UNIQUE,CANONICAL,CIRCULAR,PERFECT_EXT,UNAMBIGUOUS_BP
5	36953617	36962274	5circ_000415	30	+	7	30	40	40	T02	30	0	0	1	GTAG	NA	ANCHOR_UNIQUE,CANONICAL,CIRCULAR,PERFECT_EXT,UNAMBIGUOUS_BP
19	43545817	43551687	5circ_000416	5	-	3	4	40	40	T02	5	0	0	1	GTAG	NA	ANCHOR_UNIQUE,CANONICAL,CIRCULAR,PERFECT_EXT,UNAMBIGUOUS_BP
5	50778068	50797233	5circ_000418	2	+	2	2	40	40	T02	2	0	0	1	GTAG	NA	ANCHOR_UNIQUE,CANONICAL,CIRCULAR,PERFECT_EXT,UNAMBIGUOUS_BP
22	29094257	29142100	5circ_000419	2	+	1	2	5	5	T02	2	0	0	1	GTAG	NA	ANCHOR_UNIQUE,CANONICAL,CIRCULAR,PERFECT_EXT,UNAMBIGUOUS_BP
11	85996825	86031611	5circ_000420	19	-	9	19	40	40	T02	19	0	0	1	GTAG	NA	ANCHOR_UNIQUE,CANONICAL,CIRCULAR,PERFECT_EXT,UNAMBIGUOUS_BP
20	63775677	63790790	5circ_000421	7	-	3	7	40	35	T02	7	0	0	1	GTAG	NA	ANCHOR_UNIQUE,CANONICAL,CIRCULAR,PERFECT_EXT,UNAMBIGUOUS_BP
6	36902279	36923486	5circ_000423	6	+	2	6	5	5	T02	6	0	0	1	GTAG	NA	ANCHOR_UNIQUE,CANONICAL,CIRCULAR,PERFECT_EXT,UNAMBIGUOUS_BP
1	167371916	167374296	5circ_000424	5	+	1	5	5	5	T02	5	0	0	1	GTAG	NA	ANCHOR_UNIQUE,CANONICAL,CIRCULAR,PERFECT_EXT,UNAMBIGUOUS_BP
13	45988786	45989097	5circ_000425	5	-	4	5	40	40	T02	5	0	0	1	GTAG	NA	ANCHOR_UNIQUE,CANONICAL,CIRCULAR,PERFECT_EXT,UNAMBIGUOUS_BP
4	139116648	139139497	5circ_000426	15	-	3	15	40	40	T02	15	0	0	1	GTAG	NA	ANCHOR_UNIQUE,CANONICAL,CIRCULAR,PERFECT_EXT,UNAMBIGUOUS_BP
9	131430089	131455166	5circ_000427	5	+	1	5	40	5	T02	5	0	0	1	GTAG	NA	ANCHOR_UNIQUE,CANONICAL,CIRCULAR,PERFECT_EXT,UNAMBIGUOUS_BP
15	74489588	74512536	5circ_000428	3	+	1	3	40	40	T02	3	0	0	1	GTAG	NA	ANCHOR_UNIQUE,CANONICAL,CIRCULAR,PERFECT_EXT,UNAMBIGUOUS_BP
14	55377430	55377891	5circ_000429	9	-	3	9	5	40	T02	9	2	0	1	GTAG	NA	ANCHOR_UNIQUE,CANONICAL,CIRCULAR,OK_EXT,UNAMBIGUOUS_BP
2	218389869	218391495	5circ_000430	2	+	1	2	40	40	T02	2	1	0	1	GTAG	NA	ANCHOR_UNIQUE,CANONICAL,CIRCULAR,GOOD_EXT,UNAMBIGUOUS_BP
17	46050532	46067667	5circ_000431	3	-	2	3	40	40	T02	3	0	0	1	GTAG	NA	ANCHOR_UNIQUE,CANONICAL,CIRCULAR,PERFECT_EXT,UNAMBIGUOUS_BP
11	883147	893519	5circ_000432	4	-	3	4	40	37	T02	4	0	0	1	GTAG	NA	ANCHOR_UNIQUE,CANONICAL,CIRCULAR,PERFECT_EXT,UNAMBIGUOUS_BP
6	13639562	13644729	5circ_000433	40	-	14	40	40	40	T02	40	0	0	1	GTAG	NA	ANCHOR_UNIQUE,CANONICAL,CIRCULAR,PERFECT_EXT,UNAMBIGUOUS_BP
1	207647316	207655275	5circ_000435	6	+	2	6	5	5	T02	6	0	0	1	GTAG	NA	ANCHOR_UNIQUE,CANONICAL,CIRCULAR,PERFECT_EXT,UNAMBIGUOUS_BP
2	63433744	63439871	5circ_000436	5	-	1	5	5	40	T02	5	0	0	1	GTAG	NA	ANCHOR_UNIQUE,CANONICAL,CIRCULAR,PERFECT_EXT,UNAMBIGUOUS_BP
19	2137726	2138714	5circ_000437	17	-	6	17	40	40	T02	17	0	0	1	GTAG	NA	ANCHOR_UNIQUE,CANONICAL,CIRCULAR,PERFECT_EXT,UNAMBIGUOUS_BP
1	245915529	245929937	5circ_000439	2	-	1	2	40	40	T02	2	0	0	1	GTAG	NA	ANCHOR_UNIQUE,CANONICAL,CIRCULAR,PERFECT_EXT,UNAMBIGUOUS_BP
19	5609994	5613527	5circ_000440	4	-	1	4	40	40	T02	4	0	0	1	GTAG	NA	ANCHOR_UNIQUE,CANONICAL,CIRCULAR,PERFECT_EXT,UNAMBIGUOUS_BP
11	85996825	86001158	5circ_000441	10	-	6	10	40	40	T02	10	0	0	1	GTAG	NA	ANCHOR_UNIQUE,CANONICAL,CIRCULAR,PERFECT_EXT,UNAMBIGUOUS_BP
2	179973192	179973802	5circ_000442	4	-	1	4	5	40	T02	4	0	0	1	GTAG	NA	ANCHOR_UNIQUE,CANONICAL,CIRCULAR,PERFECT_EXT,UNAMBIGUOUS_BP
6	154860737	154860998	5circ_000444	2	+	2	2	40	40	T02	2	0	0	1	GTAG	NA	ANCHOR_UNIQUE,CANONICAL,CIRCULAR,PERFECT_EXT,UNAMBIGUOUS_BP
10	69343826	69369624	5circ_000446	2	+	2	2	40	40	T02	2	0	0	1	GTAG	NA	ANCHOR_UNIQUE,CANONICAL,CIRCULAR,PERFECT_EXT,UNAMBIGUOUS_BP
9	121822106	121822879	5circ_000447	6	-	1	6	40	40	T02	6	0	0	1	GTAG	NA	ANCHOR_UNIQUE,CANONICAL,CIRCULAR,PERFECT_EXT,UNAMBIGUOUS_BP
9	5077452	5081861	5circ_000448	2	+	1	2	5	5	T02	2	0	0	1	GTAG	NA	ANCHOR_UNIQUE,CANONICAL,CIRCULAR,PERFECT_EXT,UNAMBIGUOUS_BP
11	64741099	64741438	5circ_000449	6	-	1	6	5	40	T02	6	0	0	1	GTAG	NA	ANCHOR_UNIQUE,CANONICAL,CIRCULAR,PERFECT_EXT,UNAMBIGUOUS_BP
3	138221925	138229010	5circ_000450	4	+	1	4	40	5	T02	4	0	0	1	GTAG	NA	ANCHOR_UNIQUE,CANONICAL,CIRCULAR,PERFECT_EXT,UNAMBIGUOUS_BP
2	128097428	128109746	5circ_000451	22	+	14	22	40	40	T02	22	0	0	1	GTAG	NA	ANCHOR_UNIQUE,CANONICAL,CIRCULAR,PERFECT_EXT,UNAMBIGUOUS_BP
17	5404098	5416682	5circ_000452	6	-	2	6	40	40	T02	6	0	0	1	GTAG	NA	ANCHOR_UNIQUE,CANONICAL,CIRCULAR,PERFECT_EXT,UNAMBIGUOUS_BP
19	19457006	19465614	5circ_000453	10	+	2	10	5	40	T02	10	0	0	1	GTAG	NA	ANCHOR_UNIQUE,CANONICAL,CIRCULAR,PERFECT_EXT,UNAMBIGUOUS_BP
20	25020009	25030958	5circ_000454	10	-	2	10	40	40	T02	10	0	0	1	GTAG	NA	ANCHOR_UNIQUE,CANONICAL,CIRCULAR,PERFECT_EXT,UNAMBIGUOUS_BP
4	62773389	62773551	5circ_000455	3	+	1	3	5	5	T02	3	0	0	1	GTAG	NA	ANCHOR_UNIQUE,CANONICAL,CIRCULAR,PERFECT_EXT,UNAMBIGUOUS_BP
16	31297513	31297954	5circ_000457	107	+	51	30	40	40	T02	107	0	0	1	GTAG	NA	ANCHOR_UNIQUE,CANONICAL,CIRCULAR,PERFECT_EXT,UNAMBIGUOUS_BP
20	45427421	45429670	5circ_000458	4	+	1	4	5	40	T02	4	0	0	1	GTAG	NA	ANCHOR_UNIQUE,CANONICAL,CIRCULAR,PERFECT_EXT,UNAMBIGUOUS_BP
X	110020351	110109146	5circ_000459	2	+	1	2	40	40	T02	2	0	0	1	GTAG	NA	ANCHOR_UNIQUE,CANONICAL,CIRCULAR,PERFECT_EXT,UNAMBIGUOUS_BP
17	16057513	16058599	5circ_000460	10	-	4	10	40	40	T02	10	0	0	1	GTAG	NA	ANCHOR_UNIQUE,CANONICAL,CIRCULAR,PERFECT_EXT,UNAMBIGUOUS_BP
2	86529217	86547518	5circ_000462	6	-	2	6	5	5	T02	6	0	0	1	GTAG	NA	ANCHOR_UNIQUE,CANONICAL,CIRCULAR,PERFECT_EXT,UNAMBIGUOUS_BP
12	827041	830160	5circ_000463	10	+	4	10	40	40	T02	10	0	0	1	GTAG	NA	ANCHOR_UNIQUE,CANONICAL,CIRCULAR,PERFECT_EXT,UNAMBIGUOUS_BP
16	70500957	70512432	5circ_000464	5	-	1	5	5	35	T02	5	1	0	1	GTAG	NA	ANCHOR_UNIQUE,CANONICAL,CIRCULAR,GOOD_EXT,UNAMBIGUOUS_BP
12	62404319	62404958	5circ_000465	2	+	2	2	5	40	T02	2	1	0	1	GTAG	NA	ANCHOR_UNIQUE,CANONICAL,CIRCULAR,GOOD_EXT,UNAMBIGUOUS_BP
10	5921257	5921569	5circ_000466	3	+	1	3	40	40	T02	3	0	0	1	GTAG	NA	ANCHOR_UNIQUE,CANONICAL,CIRCULAR,PERFECT_EXT,UNAMBIGUOUS_BP
6	87155968	87156254	5circ_000467	9	+	2	9	40	37	T02	9	2	0	1	GTAG	NA	ANCHOR_UNIQUE,CANONICAL,CIRCULAR,OK_EXT,UNAMBIGUOUS_BP
8	17950614	17953186	5circ_000468	8	+	2	8	40	40	T02	8	0	0	1	GTAG	NA	ANCHOR_UNIQUE,CANONICAL,CIRCULAR,PERFECT_EXT,UNAMBIGUOUS_BP
15	78544868	78546698	5circ_000469	3	+	1	3	40	40	T02	3	0	0	1	GTAG	NA	ANCHOR_UNIQUE,CANONICAL,CIRCULAR,PERFECT_EXT,UNAMBIGUOUS_BP
17	77402058	77402703	5circ_000470	6	+	3	3	40	5	T02	6	0	0	1	GTAG	NA	ANCHOR_UNIQUE,CANONICAL,CIRCULAR,PERFECT_EXT,UNAMBIGUOUS_BP
9	112250928	112252788	5circ_000471	26	-	12	25	40	40	T02	26	0	0	1	GTAG	NA	ANCHOR_UNIQUE,CANONICAL,CIRCULAR,PERFECT_EXT,UNAMBIGUOUS_BP
16	1366017	1371611	5circ_000475	12	-	2	12	40	40	T02	12	0	0	1	GTAG	NA	ANCHOR_UNIQUE,CANONICAL,CIRCULAR,PERFECT_EXT,UNAMBIGUOUS_BP
19	8541905	8544464	5circ_000476	4	-	1	4	35	40	T02	4	0	1	1	GTAG	NA	ANCHOR_UNIQUE,CANONICAL,CIRCULAR,GOOD_EXT,UNAMBIGUOUS_BP
21	14304222	14313120	5circ_000477	3	+	1	3	5	5	T02	3	0	0	1	GTAG	NA	ANCHOR_UNIQUE,CANONICAL,CIRCULAR,PERFECT_EXT,UNAMBIGUOUS_BP
15	64406329	64418728	5circ_000478	6	+	1	6	40	5	T02	6	0	0	1	GTAG	NA	ANCHOR_UNIQUE,CANONICAL,CIRCULAR,PERFECT_EXT,UNAMBIGUOUS_BP
5	109767534	109774965	5circ_000479	12	+	5	12	40	40	T02	12	0	0	1	GTAG	NA	ANCHOR_UNIQUE,CANONICAL,CIRCULAR,PERFECT_EXT,UNAMBIGUOUS_BP
13	24288998	24290884	5circ_000480	8	+	3	8	40	40	T02	8	0	0	1	GTAG	NA	ANCHOR_UNIQUE,CANONICAL,CIRCULAR,PERFECT_EXT,UNAMBIGUOUS_BP
17	27304779	27309272	5circ_000481	5	+	1	5	5	40	T02	5	0	0	1	GTAG	NA	ANCHOR_UNIQUE,CANONICAL,CIRCULAR,PERFECT_EXT,UNAMBIGUOUS_BP
12	56433025	56434231	5circ_000482	5	-	1	5	40	40	T02	5	1	0	1	GTAG	NA	ANCHOR_UNIQUE,CANONICAL,CIRCULAR,GOOD_EXT,UNAMBIGUOUS_BP
8	140585118	140585311	5circ_000483	5	-	5	5	40	40	T02	5	0	0	1	GTAG	NA	ANCHOR_UNIQUE,CANONICAL,CIRCULAR,PERFECT_EXT,UNAMBIGUOUS_BP
X	1288518	1290509	5circ_000485	2	+	1	2	35	40	T02	2	0	0	1	GTAG	NA	ANCHOR_UNIQUE,CANONICAL,CIRCULAR,PERFECT_EXT,UNAMBIGUOUS_BP
10	50343491	50344345	5circ_000486	6	-	4	6	5	5	T02	6	0	0	1	GTAG	NA	ANCHOR_UNIQUE,CANONICAL,CIRCULAR,PERFECT_EXT,UNAMBIGUOUS_BP
1	235326999	235327772	5circ_000487	5	-	2	5	40	40	T02	5	2	0	1	GTAG	NA	ANCHOR_UNIQUE,CANONICAL,CIRCULAR,OK_EXT,UNAMBIGUOUS_BP
6	149603267	149604782	5circ_000488	4	-	3	4	40	40	T02	4	0	0	1	GTAG	NA	ANCHOR_UNIQUE,CANONICAL,CIRCULAR,PERFECT_EXT,UNAMBIGUOUS_BP
17	37540379	37554059	5circ_000489	2	-	1	2	40	5	T02	2	0	0	1	GTAG	NA	ANCHOR_UNIQUE,CANONICAL,CIRCULAR,PERFECT_EXT,UNAMBIGUOUS_BP
9	137754170	137762820	5circ_000490	2	+	1	2	5	40	T02	2	0	0	1	GTAG	NA	ANCHOR_UNIQUE,CANONICAL,CIRCULAR,PERFECT_EXT,UNAMBIGUOUS_BP
9	121348014	121354673	5circ_000491	2	-	1	2	5	5	T02	2	0	0	1	GTAG	NA	ANCHOR_UNIQUE,CANONICAL,CIRCULAR,PERFECT_EXT,UNAMBIGUOUS_BP
9	36352741	36353331	5circ_000492	11	-	5	11	40	40	T02	11	0	0	1	GTAG	NA	ANCHOR_UNIQUE,CANONICAL,CIRCULAR,PERFECT_EXT,UNAMBIGUOUS_BP
13	59693756	59696196	5circ_000493	4	-	1	4	5	40	T02	4	0	0	1	GTAG	NA	ANCHOR_UNIQUE,CANONICAL,CIRCULAR,PERFECT_EXT,UNAMBIGUOUS_BP
12	123210055	123218499	5circ_000494	9	-	2	9	40	5	T02	9	0	0	1	GTAG	NA	ANCHOR_UNIQUE,CANONICAL,CIRCULAR,PERFECT_EXT,UNAMBIGUOUS_BP
1	235793502	235801097	5circ_000495	3	-	1	3	40	40	T02	3	0	0	1	GTAG	NA	ANCHOR_UNIQUE,CANONICAL,CIRCULAR,PERFECT_EXT,UNAMBIGUOUS_BP
21	39224407	39229436	5circ_000496	4	-	1	4	40	40	T02	4	0	0	1	GTAG	NA	ANCHOR_UNIQUE,CANONICAL,CIRCULAR,PERFECT_EXT,UNAMBIGUOUS_BP
11	28058925	28062516	5circ_000498	4	-	1	4	5	5	T02	4	0	0	1	GTAG	NA	ANCHOR_UNIQUE,CANONICAL,CIRCULAR,PERFECT_EXT,UNAMBIGUOUS_BP
1	84179176	84214317	5circ_000499	6	+	1	6	5	40	T02	6	0	0	1	GTAG	NA	ANCHOR_UNIQUE,CANONICAL,CIRCULAR,PERFECT_EXT,UNAMBIGUOUS_BP
6	629834	637861	5circ_000500	2	-	2	2	40	40	T02	2	0	0	1	GTAG	NA	ANCHOR_UNIQUE,CANONICAL,CIRCULAR,PERFECT_EXT,UNAMBIGUOUS_BP
3	183947323	183949881	5circ_000501	2	-	1	2	5	40	T02	2	0	0	1	GTAG	NA	ANCHOR_UNIQUE,CANONICAL,CIRCULAR,PERFECT_EXT,UNAMBIGUOUS_BP
13	114040999	114057474	5circ_000502	100	-	32	95	40	40	T02	100	0	0	1	GTAG	NA	ANCHOR_UNIQUE,CANONICAL,CIRCULAR,PERFECT_EXT,UNAMBIGUOUS_BP
10	17684674	17688173	5circ_000503	4	+	2	4	40	40	T02	4	0	0	1	GTAG	NA	ANCHOR_UNIQUE,CANONICAL,CIRCULAR,PERFECT_EXT,UNAMBIGUOUS_BP
6	53506912	53522527	5circ_000504	4	-	4	4	40	40	T02	4	0	0	1	GTAG	NA	ANCHOR_UNIQUE,CANONICAL,CIRCULAR,PERFECT_EXT,UNAMBIGUOUS_BP
1	86715723	86719635	5circ_000505	14	+	5	14	5	40	T02	14	0	0	1	GTAG	NA	ANCHOR_UNIQUE,CANONICAL,CIRCULAR,PERFECT_EXT,UNAMBIGUOUS_BP
16	66816580	66821559	5circ_000506	2	-	1	2	5	5	T02	2	0	0	1	GTAG	NA	ANCHOR_UNIQUE,CANONICAL,CIRCULAR,PERFECT_EXT,UNAMBIGUOUS_BP
4	48590658	48605833	5circ_000508	3	-	2	3	40	35	T02	3	0	0	1	GTAG	NA	ANCHOR_UNIQUE,CANONICAL,CIRCULAR,PERFECT_EXT,UNAMBIGUOUS_BP
19	37199399	37207254	5circ_000511	8	-	3	5	5	40	T02	8	0	0	1	GTAG	NA	ANCHOR_UNIQUE,CANONICAL,CIRCULAR,PERFECT_EXT,UNAMBIGUOUS_BP
1	55146928	55154466	5circ_000514	4	-	2	4	40	40	T02	4	0	0	1	GTAG	NA	ANCHOR_UNIQUE,CANONICAL,CIRCULAR,PERFECT_EXT,UNAMBIGUOUS_BP
4	127669035	127687867	5circ_000515	12	+	4	12	40	40	T02	12	0	0	1	GTAG	NA	ANCHOR_UNIQUE,CANONICAL,CIRCULAR,PERFECT_EXT,UNAMBIGUOUS_BP
10	5956378	5963841	5circ_000516	2	-	1	2	5	40	T02	2	0	0	1	GTAG	NA	ANCHOR_UNIQUE,CANONICAL,CIRCULAR,PERFECT_EXT,UNAMBIGUOUS_BP
3	12599690	12604289	5circ_000517	18	-	9	18	40	40	T02	18	0	0	1	GTAG	NA	ANCHOR_UNIQUE,CANONICAL,CIRCULAR,PERFECT_EXT,UNAMBIGUOUS_BP
3	15013588	15014174	5circ_000518	18	+	5	18	40	40	T02	18	0	0	1	GTAG	NA	ANCHOR_UNIQUE,CANONICAL,CIRCULAR,PERFECT_EXT,UNAMBIGUOUS_BP
9	132207504	132208920	5circ_000519	2	+	1	2	5	5	T02	2	0	0	1	GTAG	NA	ANCHOR_UNIQUE,CANONICAL,CIRCULAR,PERFECT_EXT,UNAMBIGUOUS_BP
1	155670319	155675096	5circ_000521	7	-	3	4	5	40	T02	7	0	0	1	GTAG	NA	ANCHOR_UNIQUE,CANONICAL,CIRCULAR,PERFECT_EXT,UNAMBIGUOUS_BP
8	60794985	60808272	5circ_000522	3	+	1	3	5	5	T02	3	0	0	1	GTAG	NA	ANCHOR_UNIQUE,CANONICAL,CIRCULAR,PERFECT_EXT,UNAMBIGUOUS_BP
5	73058432	73077493	5circ_000525	224	+	61	213	40	40	T02	224	0	0	1	GTAG	NA	ANCHOR_UNIQUE,CANONICAL,CIRCULAR,PERFECT_EXT,UNAMBIGUOUS_BP
X	10195702	10196499	5circ_000526	8	+	2	8	40	40	T02	8	1	0	1	GTAG	NA	ANCHOR_UNIQUE,CANONICAL,CIRCULAR,GOOD_EXT,UNAMBIGUOUS_BP
14	30902535	30911162	5circ_000528	23	-	6	23	40	40	T02	23	0	0	1	GTAG	NA	ANCHOR_UNIQUE,CANONICAL,CIRCULAR,PERFECT_EXT,UNAMBIGUOUS_BP
16	4651962	4652824	5circ_000529	4	+	2	4	40	40	T02	4	0	0	1	GTAG	NA	ANCHOR_UNIQUE,CANONICAL,CIRCULAR,PERFECT_EXT,UNAMBIGUOUS_BP
6	149701778	149702266	5circ_000530	2	-	2	2	40	5	T02	2	0	0	1	GTAG	NA	ANCHOR_UNIQUE,CANONICAL,CIRCULAR,PERFECT_EXT,UNAMBIGUOUS_BP
12	1729972	1754514	5circ_000531	7	+	2	7	40	37	T02	7	0	0	1	GTAG	NA	ANCHOR_UNIQUE,CANONICAL,CIRCULAR,PERFECT_EXT,UNAMBIGUOUS_BP
2	183182556	183188763	5circ_000532	2	+	1	2	5	5	T02	2	1	0	1	GTAG	NA	ANCHOR_UNIQUE,CANONICAL,CIRCULAR,GOOD_EXT,UNAMBIGUOUS_BP
20	45965357	45965774	5circ_000533	4	-	3	4	40	40	T02	4	0	0	1	GTAG	NA	ANCHOR_UNIQUE,CANONICAL,CIRCULAR,PERFECT_EXT,UNAMBIGUOUS_BP
1	151166933	151167414	5circ_000534	26	+	14	25	40	40	T02	26	0	0	1	GTAG	NA	ANCHOR_UNIQUE,CANONICAL,CIRCULAR,PERFECT_EXT,UNAMBIGUOUS_BP
1	47272075	47304996	5circ_000535	6	-	2	6	40	5	T02	6	0	0	1	GTAG	NA	ANCHOR_UNIQUE,CANONICAL,CIRCULAR,PERFECT_EXT,UNAMBIGUOUS_BP
10	179993	221356	5circ_000536	12	+	3	12	40	40	T02	12	0	0	1	GTAG	NA	ANCHOR_UNIQUE,CANONICAL,CIRCULAR,PERFECT_EXT,UNAMBIGUOUS_BP
1	47272075	47300152	5circ_000538	2	-	1	2	40	5	T02	2	0	0	1	GTAG	NA	ANCHOR_UNIQUE,CANONICAL,CIRCULAR,PERFECT_EXT,UNAMBIGUOUS_BP
1	47287550	47293544	5circ_000539	2	-	1	2	5	5	T02	2	0	0	1	GTAG	NA	ANCHOR_UNIQUE,CANONICAL,CIRCULAR,PERFECT_EXT,UNAMBIGUOUS_BP
5	14673641	14681624	5circ_000541	2	+	2	2	40	40	T02	2	0	0	1	GTAG	NA	ANCHOR_UNIQUE,CANONICAL,CIRCULAR,PERFECT_EXT,UNAMBIGUOUS_BP
2	128014802	128017915	5circ_000542	2	-	1	2	40	40	T02	2	0	0	1	GTAG	NA	ANCHOR_UNIQUE,CANONICAL,CIRCULAR,PERFECT_EXT,UNAMBIGUOUS_BP
3	47661293	47678311	5circ_000543	2	-	1	2	40	40	T02	2	0	0	1	GTAG	NA	ANCHOR_UNIQUE,CANONICAL,CIRCULAR,PERFECT_EXT,UNAMBIGUOUS_BP
6	111405469	111416472	5circ_000544	2	-	1	2	5	40	T02	2	0	0	1	GTAG	NA	ANCHOR_UNIQUE,CANONICAL,CIRCULAR,PERFECT_EXT,UNAMBIGUOUS_BP
11	128768117	128772985	5circ_000545	6	+	2	6	5	5	T02	6	0	0	1	GTAG	NA	ANCHOR_UNIQUE,CANONICAL,CIRCULAR,PERFECT_EXT,UNAMBIGUOUS_BP
2	171448680	171458477	5circ_000546	6	+	2	6	40	40	T02	6	0	0	1	GTAG	NA	ANCHOR_UNIQUE,CANONICAL,CIRCULAR,PERFECT_EXT,UNAMBIGUOUS_BP
20	45000391	45001353	5circ_000547	3	+	1	3	40	5	T02	3	0	0	1	GTAG	NA	ANCHOR_UNIQUE,CANONICAL,CIRCULAR,PERFECT_EXT,UNAMBIGUOUS_BP
5	172061138	172090362	5circ_000550	3	-	2	2	40	5	T02	3	0	0	1	GTAG	NA	ANCHOR_UNIQUE,CANONICAL,CIRCULAR,PERFECT_EXT,UNAMBIGUOUS_BP
16	88835941	88836140	5circ_000551	2	+	1	2	37	40	T02	2	0	0	1	GTAG	NA	ANCHOR_UNIQUE,CANONICAL,CIRCULAR,PERFECT_EXT,UNAMBIGUOUS_BP
5	37721114	37727045	5circ_000552	8	+	2	8	40	40	T02	8	0	0	1	GTAG	NA	ANCHOR_UNIQUE,CANONICAL,CIRCULAR,PERFECT_EXT,UNAMBIGUOUS_BP
4	72295653	72323097	5circ_000553	2	-	2	2	40	40	T02	2	0	0	1	GTAG	NA	ANCHOR_UNIQUE,CANONICAL,CIRCULAR,PERFECT_EXT,UNAMBIGUOUS_BP
12	103979830	103980962	5circ_000554	3	+	2	2	5	5	T02	3	0	0	1	GTAG	NA	ANCHOR_UNIQUE,CANONICAL,CIRCULAR,PERFECT_EXT,UNAMBIGUOUS_BP
22	46235132	46235513	5circ_000555	3	+	1	3	40	5	T02	3	0	0	1	GTAG	NA	ANCHOR_UNIQUE,CANONICAL,CIRCULAR,PERFECT_EXT,UNAMBIGUOUS_BP
1	32161946	32167296	5circ_000556	2	+	1	2	5	40	T02	2	0	0	1	GTAG	NA	ANCHOR_UNIQUE,CANONICAL,CIRCULAR,PERFECT_EXT,UNAMBIGUOUS_BP
17	8893585	8911507	5circ_000557	3	-	1	3	5	5	T02	3	0	0	1	GTAG	NA	ANCHOR_UNIQUE,CANONICAL,CIRCULAR,PERFECT_EXT,UNAMBIGUOUS_BP
15	49225204	49292537	5circ_000558	3	+	2	3	40	40	T02	3	0	0	1	GTAG	NA	ANCHOR_UNIQUE,CANONICAL,CIRCULAR,PERFECT_EXT,UNAMBIGUOUS_BP
12	112203635	112204623	5circ_000559	15	-	3	15	40	40	T02	15	0	0	1	GTAG	NA	ANCHOR_UNIQUE,CANONICAL,CIRCULAR,PERFECT_EXT,UNAMBIGUOUS_BP
4	78826036	78851056	5circ_000561	21	+	5	21	40	40	T02	21	0	0	1	GTAG	NA	ANCHOR_UNIQUE,CANONICAL,CIRCULAR,PERFECT_EXT,UNAMBIGUOUS_BP
12	10624650	10637196	5circ_000562	6	-	2	6	40	40	T02	6	0	0	1	GTAG	NA	ANCHOR_UNIQUE,CANONICAL,CIRCULAR,PERFECT_EXT,UNAMBIGUOUS_BP
1	197595207	197617759	5circ_000563	2	-	2	2	40	40	T02	2	0	0	1	GTAG	NA	ANCHOR_UNIQUE,CANONICAL,CIRCULAR,PERFECT_EXT,UNAMBIGUOUS_BP
19	3425105	3449139	5circ_000565	2	+	2	2	40	40	T02	2	0	0	1	GTAG	NA	ANCHOR_UNIQUE,CANONICAL,CIRCULAR,PERFECT_EXT,UNAMBIGUOUS_BP
3	44629064	44631221	5circ_000566	5	+	3	5	40	5	T02	5	0	0	1	GTAG	NA	ANCHOR_UNIQUE,CANONICAL,CIRCULAR,PERFECT_EXT,UNAMBIGUOUS_BP
8	66592439	66602523	5circ_000567	3	-	2	3	35	40	T02	3	0	0	1	GTAG	NA	ANCHOR_UNIQUE,CANONICAL,CIRCULAR,PERFECT_EXT,UNAMBIGUOUS_BP
12	57063118	57072912	5circ_000568	3	-	1	3	40	35	T02	3	0	0	1	GTAG	NA	ANCHOR_UNIQUE,CANONICAL,CIRCULAR,PERFECT_EXT,UNAMBIGUOUS_BP
17	47129392	47143982	5circ_000570	3	-	1	3	5	5	T02	3	0	0	1	GTAG	NA	ANCHOR_UNIQUE,CANONICAL,CIRCULAR,PERFECT_EXT,UNAMBIGUOUS_BP
10	133271199	133271954	5circ_000571	2	-	2	2	40	40	T02	2	1	0	1	GTAG	NA	ANCHOR_UNIQUE,CANONICAL,CIRCULAR,GOOD_EXT,UNAMBIGUOUS_BP
11	121045673	121055308	5circ_000572	3	+	2	3	40	40	T02	3	0	0	1	GTAG	NA	ANCHOR_UNIQUE,CANONICAL,CIRCULAR,PERFECT_EXT,UNAMBIGUOUS_BP
22	31725537	31738911	5circ_000573	4	-	2	4	40	40	T02	4	0	0	1	GTAG	NA	ANCHOR_UNIQUE,CANONICAL,CIRCULAR,PERFECT_EXT,UNAMBIGUOUS_BP
12	101714089	101716812	5circ_000574	54	+	24	46	40	40	T02	54	0	0	1	GTAG	NA	ANCHOR_UNIQUE,CANONICAL,CIRCULAR,PERFECT_EXT,UNAMBIGUOUS_BP
7	6111124	6115523	5circ_000575	4	+	2	4	40	40	T02	4	0	0	1	GTAG	NA	ANCHOR_UNIQUE,CANONICAL,CIRCULAR,PERFECT_EXT,UNAMBIGUOUS_BP
19	14630038	14641616	5circ_000576	2	-	1	2	5	5	T02	2	0	0	1	GTAG	NA	ANCHOR_UNIQUE,CANONICAL,CIRCULAR,PERFECT_EXT,UNAMBIGUOUS_BP
6	89738325	89743714	5circ_000577	2	-	1	2	5	40	T02	2	1	0	1	GTAG	NA	ANCHOR_UNIQUE,CANONICAL,CIRCULAR,GOOD_EXT,UNAMBIGUOUS_BP
1	229530198	229531731	5circ_000578	5	-	1	5	5	5	T02	5	0	0	1	GTAG	NA	ANCHOR_UNIQUE,CANONICAL,CIRCULAR,PERFECT_EXT,UNAMBIGUOUS_BP
14	73893796	73904110	5circ_000579	5	+	1	5	40	40	T02	5	0	0	1	GTAG	NA	ANCHOR_UNIQUE,CANONICAL,CIRCULAR,PERFECT_EXT,UNAMBIGUOUS_BP
4	88113302	88140014	5circ_000580	4	-	2	4	40	40	T02	4	0	0	1	GTAG	NA	ANCHOR_UNIQUE,CANONICAL,CIRCULAR,PERFECT_EXT,UNAMBIGUOUS_BP
14	69089947	69091887	5circ_000581	3	-	2	2	40	40	T02	3	0	0	1	GTAG	NA	ANCHOR_UNIQUE,CANONICAL,CIRCULAR,PERFECT_EXT,UNAMBIGUOUS_BP
11	71982760	71990717	5circ_000582	2	+	1	2	40	40	T02	2	0	0	1	GTAG	NA	ANCHOR_UNIQUE,CANONICAL,CIRCULAR,PERFECT_EXT,UNAMBIGUOUS_BP
22	42826939	42835493	5circ_000583	6	-	2	6	40	40	T02	6	0	0	1	GTAG	NA	ANCHOR_UNIQUE,CANONICAL,CIRCULAR,PERFECT_EXT,UNAMBIGUOUS_BP
17	50979745	50987237	5circ_000584	6	-	2	6	40	40	T02	6	0	0	1	GTAG	NA	ANCHOR_UNIQUE,CANONICAL,CIRCULAR,PERFECT_EXT,UNAMBIGUOUS_BP
15	63669537	63672694	5circ_000585	13	-	4	13	40	40	T02	13	0	0	1	GTAG	NA	ANCHOR_UNIQUE,CANONICAL,CIRCULAR,PERFECT_EXT,UNAMBIGUOUS_BP
8	41704040	41706241	5circ_000586	19	-	7	19	40	40	T02	19	0	0	1	GTAG	NA	ANCHOR_UNIQUE,CANONICAL,CIRCULAR,PERFECT_EXT,UNAMBIGUOUS_BP
1	15633438	15643650	5circ_000587	2	+	1	2	5	40	T02	2	0	0	1	GTAG	NA	ANCHOR_UNIQUE,CANONICAL,CIRCULAR,PERFECT_EXT,UNAMBIGUOUS_BP
15	66520589	66540210	5circ_000588	8	+	1	8	40	40	T02	8	0	0	1	GTAG	NA	ANCHOR_UNIQUE,CANONICAL,CIRCULAR,PERFECT_EXT,UNAMBIGUOUS_BP
12	112229697	112248512	5circ_000589	3	-	1	3	40	35	T02	3	0	0	1	GTAG	NA	ANCHOR_UNIQUE,CANONICAL,CIRCULAR,PERFECT_EXT,UNAMBIGUOUS_BP
16	68801669	68815759	5circ_000590	6	+	4	5	40	40	T02	6	0	0	1	GTAG	NA	ANCHOR_UNIQUE,CANONICAL,CIRCULAR,PERFECT_EXT,UNAMBIGUOUS_BP
2	71611244	71613410	5circ_000591	6	+	2	6	40	40	T02	6	0	0	1	GTAG	NA	ANCHOR_UNIQUE,CANONICAL,CIRCULAR,PERFECT_EXT,UNAMBIGUOUS_BP
11	16177808	16186955	5circ_000592	5	-	1	5	40	40	T02	5	0	0	1	GTAG	NA	ANCHOR_UNIQUE,CANONICAL,CIRCULAR,PERFECT_EXT,UNAMBIGUOUS_BP
4	870710	884086	5circ_000593	2	-	1	2	40	5	T02	2	0	0	1	GTAG	NA	ANCHOR_UNIQUE,CANONICAL,CIRCULAR,PERFECT_EXT,UNAMBIGUOUS_BP
1	32377969	32378839	5circ_000595	3	-	1	3	40	40	T02	3	0	0	1	GTAG	NA	ANCHOR_UNIQUE,CANONICAL,CIRCULAR,PERFECT_EXT,UNAMBIGUOUS_BP
1	172555868	172557794	5circ_000596	48	+	15	48	40	40	T02	48	0	0	1	GTAG	NA	ANCHOR_UNIQUE,CANONICAL,CIRCULAR,PERFECT_EXT,UNAMBIGUOUS_BP
19	11172980	11176817	5circ_000597	7	-	1	7	5	5	T02	7	0	0	1	GTAG	NA	ANCHOR_UNIQUE,CANONICAL,CIRCULAR,PERFECT_EXT,UNAMBIGUOUS_BP
11	61132419	61138835	5circ_000598	4	-	2	3	5	40	T02	4	0	0	1	GTAG	NA	ANCHOR_UNIQUE,CANONICAL,CIRCULAR,PERFECT_EXT,UNAMBIGUOUS_BP
1	15630324	15643650	5circ_000600	5	+	1	5	5	40	T02	5	0	0	1	GTAG	NA	ANCHOR_UNIQUE,CANONICAL,CIRCULAR,PERFECT_EXT,UNAMBIGUOUS_BP
9	135881632	135883078	5circ_000601	98	-	30	86	40	40	T02	98	0	0	1	GTAG	NA	ANCHOR_UNIQUE,CANONICAL,CIRCULAR,PERFECT_EXT,UNAMBIGUOUS_BP
11	62723586	62724426	5circ_000602	9	-	1	9	5	40	T02	9	0	0	1	GTAG	NA	ANCHOR_UNIQUE,CANONICAL,CIRCULAR,PERFECT_EXT,UNAMBIGUOUS_BP
19	49599271	49599938	5circ_000603	6	+	1	6	5	40	T02	6	0	0	1	GTAG	NA	ANCHOR_UNIQUE,CANONICAL,CIRCULAR,PERFECT_EXT,UNAMBIGUOUS_BP
17	43498861	43500103	5circ_000604	3	+	1	3	5	5	T02	3	0	0	1	GTAG	NA	ANCHOR_UNIQUE,CANONICAL,CIRCULAR,PERFECT_EXT,UNAMBIGUOUS_BP
2	74046277	74080591	5circ_000605	4	+	1	4	35	40	T02	4	0	0	1	GTAG	NA	ANCHOR_UNIQUE,CANONICAL,CIRCULAR,PERFECT_EXT,UNAMBIGUOUS_BP
1	44308309	44339322	5circ_000607	13	-	5	13	40	40	T02	13	0	0	1	GTAG	NA	ANCHOR_UNIQUE,CANONICAL,CIRCULAR,PERFECT_EXT,UNAMBIGUOUS_BP
21	44052279	44063785	5circ_000608	2	+	2	2	40	40	T02	2	0	0	1	GTAG	NA	ANCHOR_UNIQUE,CANONICAL,CIRCULAR,PERFECT_EXT,UNAMBIGUOUS_BP
10	26500818	26513660	5circ_000611	3	+	2	3	35	40	T02	3	0	0	1	GTAG	NA	ANCHOR_UNIQUE,CANONICAL,CIRCULAR,PERFECT_EXT,UNAMBIGUOUS_BP
11	68759568	68761687	5circ_000612	18	-	3	18	40	40	T02	18	0	0	1	GTAG	NA	ANCHOR_UNIQUE,CANONICAL,CIRCULAR,PERFECT_EXT,UNAMBIGUOUS_BP
X	10063444	10117689	5circ_000613	2	+	1	2	5	40	T02	2	0	0	1	GTAG	NA	ANCHOR_UNIQUE,CANONICAL,CIRCULAR,PERFECT_EXT,UNAMBIGUOUS_BP
14	23075495	23079715	5circ_000614	2	-	2	2	40	40	T02	2	0	0	1	GTAG	NA	ANCHOR_UNIQUE,CANONICAL,CIRCULAR,PERFECT_EXT,UNAMBIGUOUS_BP
4	105424195	105456745	5circ_000615	2	-	2	2	40	40	T02	2	0	0	1	GTAG	NA	ANCHOR_UNIQUE,CANONICAL,CIRCULAR,PERFECT_EXT,UNAMBIGUOUS_BP
15	50300788	50304133	5circ_000616	13	-	8	13	40	40	T02	13	0	0	1	GTAG	NA	ANCHOR_UNIQUE,CANONICAL,CIRCULAR,PERFECT_EXT,UNAMBIGUOUS_BP
2	73239642	73250438	5circ_000618	28	+	3	28	40	40	T02	28	0	0	1	GTAG	NA	ANCHOR_UNIQUE,CANONICAL,CIRCULAR,PERFECT_EXT,UNAMBIGUOUS_BP
2	33342837	33365503	5circ_000619	4	+	1	4	40	40	T02	4	0	0	1	GTAG	NA	ANCHOR_UNIQUE,CANONICAL,CIRCULAR,PERFECT_EXT,UNAMBIGUOUS_BP
16	89733481	89737905	5circ_000620	6	+	1	6	40	40	T02	6	0	0	1	GTAG	NA	ANCHOR_UNIQUE,CANONICAL,CIRCULAR,PERFECT_EXT,UNAMBIGUOUS_BP
6	158707229	158725637	5circ_000621	7	+	4	7	40	40	T02	7	0	0	1	GTAG	NA	ANCHOR_UNIQUE,CANONICAL,CIRCULAR,PERFECT_EXT,UNAMBIGUOUS_BP
1	65364634	65379524	5circ_000622	14	+	4	14	40	40	T02	14	0	0	1	GTAG	NA	ANCHOR_UNIQUE,CANONICAL,CIRCULAR,PERFECT_EXT,UNAMBIGUOUS_BP
X	41217219	41223402	5circ_000623	7	+	5	7	40	40	T02	7	0	0	1	GTAG	NA	ANCHOR_UNIQUE,CANONICAL,CIRCULAR,PERFECT_EXT,UNAMBIGUOUS_BP
6	31271232	31356326	5circ_000624	90	+	23	14	40	37	T02	90	0	0	1	GTAG	NA	ANCHOR_UNIQUE,CANONICAL,CIRCULAR,PERFECT_EXT,UNAMBIGUOUS_BP
12	50852271	50900509	5circ_000626	4	-	1	4	5	5	T02	4	0	0	1	GTAG	NA	ANCHOR_UNIQUE,CANONICAL,CIRCULAR,PERFECT_EXT,UNAMBIGUOUS_BP
20	25020009	25023641	5circ_000627	4	-	2	4	40	40	T02	4	0	0	1	GTAG	NA	ANCHOR_UNIQUE,CANONICAL,CIRCULAR,PERFECT_EXT,UNAMBIGUOUS_BP
19	24046183	24049014	5circ_000628	3	+	2	3	5	5	T02	3	0	0	1	GTAG	NA	ANCHOR_UNIQUE,CANONICAL,CIRCULAR,PERFECT_EXT,UNAMBIGUOUS_BP
11	211198	212759	5circ_000629	6	+	2	6	40	5	T02	6	0	0	1	GTAG	NA	ANCHOR_UNIQUE,CANONICAL,CIRCULAR,PERFECT_EXT,UNAMBIGUOUS_BP
1	15626668	15643650	5circ_000630	13	+	3	13	40	40	T02	13	0	0	1	GTAG	NA	ANCHOR_UNIQUE,CANONICAL,CIRCULAR,PERFECT_EXT,UNAMBIGUOUS_BP
7	44624316	44647534	5circ_000631	2	+	1	2	40	40	T02	2	0	0	1	GTAG	NA	ANCHOR_UNIQUE,CANONICAL,CIRCULAR,PERFECT_EXT,UNAMBIGUOUS_BP
3	56627036	56628614	5circ_000632	6	-	2	6	5	40	T02	6	0	0	1	GTAG	NA	ANCHOR_UNIQUE,CANONICAL,CIRCULAR,PERFECT_EXT,UNAMBIGUOUS_BP
21	33432176	33432871	5circ_000633	31	+	11	31	40	40	T02	31	0	0	1	GTAG	NA	ANCHOR_UNIQUE,CANONICAL,CIRCULAR,PERFECT_EXT,UNAMBIGUOUS_BP
20	25462382	25477089	5circ_000634	3	-	2	3	40	40	T02	3	0	0	1	GTAG	NA	ANCHOR_UNIQUE,CANONICAL,CIRCULAR,PERFECT_EXT,UNAMBIGUOUS_BP
1	28035543	28058094	5circ_000635	11	-	7	10	40	35	T02	11	0	0	1	GTAG	NA	ANCHOR_UNIQUE,CANONICAL,CIRCULAR,PERFECT_EXT,UNAMBIGUOUS_BP
3	196885150	196886694	5circ_000636	12	+	3	12	5	5	T02	12	0	0	1	GTAG	NA	ANCHOR_UNIQUE,CANONICAL,CIRCULAR,PERFECT_EXT,UNAMBIGUOUS_BP
3	112563384	112573956	5circ_000638	12	+	3	12	37	40	T02	12	0	0	1	GTAG	NA	ANCHOR_UNIQUE,CANONICAL,CIRCULAR,PERFECT_EXT,UNAMBIGUOUS_BP
X	55013485	55020504	5circ_000639	6	-	3	3	40	40	T02	6	0	0	1	GTAG	NA	ANCHOR_UNIQUE,CANONICAL,CIRCULAR,PERFECT_EXT,UNAMBIGUOUS_BP
21	43746078	43749080	5circ_000641	4	+	2	4	40	40	T02	4	0	0	1	GTAG	NA	ANCHOR_UNIQUE,CANONICAL,CIRCULAR,PERFECT_EXT,UNAMBIGUOUS_BP
1	167690048	167694302	5circ_000642	2	+	1	2	40	40	T02	2	0	0	1	GTAG	NA	ANCHOR_UNIQUE,CANONICAL,CIRCULAR,PERFECT_EXT,UNAMBIGUOUS_BP
11	5225492	5227035	5circ_000643	5	+	3	4	5	5	T02	5	0	0	1	GTAG	NA	ANCHOR_UNIQUE,CANONICAL,CIRCULAR,PERFECT_EXT,UNAMBIGUOUS_BP
3	197866111	197871462	5circ_000644	30	+	8	30	40	40	T02	30	0	0	1	GTAG	NA	ANCHOR_UNIQUE,CANONICAL,CIRCULAR,PERFECT_EXT,UNAMBIGUOUS_BP
10	86680081	86687272	5circ_000645	2	+	2	2	40	40	T02	2	0	0	1	GTAG	NA	ANCHOR_UNIQUE,CANONICAL,CIRCULAR,PERFECT_EXT,UNAMBIGUOUS_BP
3	33619602	33639810	5circ_000646	3	-	1	3	5	5	T02	3	0	0	1	GTAG	NA	ANCHOR_UNIQUE,CANONICAL,CIRCULAR,PERFECT_EXT,UNAMBIGUOUS_BP
7	4740837	4741023	5circ_000647	3	+	2	3	40	5	T02	3	0	0	1	GTAG	NA	ANCHOR_UNIQUE,CANONICAL,CIRCULAR,PERFECT_EXT,UNAMBIGUOUS_BP
15	49027364	49037769	5circ_000648	4	-	2	4	5	40	T02	4	0	0	1	GTAG	NA	ANCHOR_UNIQUE,CANONICAL,CIRCULAR,PERFECT_EXT,UNAMBIGUOUS_BP
22	19392100	19396947	5circ_000650	10	-	2	10	40	40	T02	10	0	0	1	GTAG	NA	ANCHOR_UNIQUE,CANONICAL,CIRCULAR,PERFECT_EXT,UNAMBIGUOUS_BP
5	57246299	57247215	5circ_000651	6	+	5	6	40	40	T02	6	0	0	1	GTAG	NA	ANCHOR_UNIQUE,CANONICAL,CIRCULAR,PERFECT_EXT,UNAMBIGUOUS_BP
9	109080838	109108570	5circ_000652	2	-	1	2	40	40	T02	2	0	0	1	GTAG	NA	ANCHOR_UNIQUE,CANONICAL,CIRCULAR,PERFECT_EXT,UNAMBIGUOUS_BP
6	43555835	43567354	5circ_000653	6	-	1	6	40	5	T02	6	0	0	1	GTAG	NA	ANCHOR_UNIQUE,CANONICAL,CIRCULAR,PERFECT_EXT,UNAMBIGUOUS_BP
1	21002712	21050994	5circ_000654	5	-	2	5	40	5	T02	5	1	0	1	GTAG	NA	ANCHOR_UNIQUE,CANONICAL,CIRCULAR,GOOD_EXT,UNAMBIGUOUS_BP
12	56430880	56434231	5circ_000656	6	-	1	6	40	40	T02	6	1	0	1	GTAG	NA	ANCHOR_UNIQUE,CANONICAL,CIRCULAR,GOOD_EXT,UNAMBIGUOUS_BP
5	131967939	131994251	5circ_000657	5	-	1	5	40	40	T02	5	0	0	1	GTAG	NA	ANCHOR_UNIQUE,CANONICAL,CIRCULAR,PERFECT_EXT,UNAMBIGUOUS_BP
22	32485067	32493281	5circ_000658	2	+	1	2	40	35	T02	2	0	2	1	GTAG	NA	ANCHOR_UNIQUE,CANONICAL,CIRCULAR,OK_EXT,UNAMBIGUOUS_BP
15	59066763	59067083	5circ_000659	3	+	1	3	40	40	T02	3	0	0	1	GTAG	NA	ANCHOR_UNIQUE,CANONICAL,CIRCULAR,PERFECT_EXT,UNAMBIGUOUS_BP
19	32915336	32918339	5circ_000660	7	-	2	7	40	40	T02	7	0	0	1	GTAG	NA	ANCHOR_UNIQUE,CANONICAL,CIRCULAR,PERFECT_EXT,UNAMBIGUOUS_BP
7	105062163	105063580	5circ_000662	3	+	1	3	5	5	T02	3	0	0	1	GTAG	NA	ANCHOR_UNIQUE,CANONICAL,CIRCULAR,PERFECT_EXT,UNAMBIGUOUS_BP
10	30450257	30451744	5circ_000664	4	+	1	4	40	5	T02	4	0	0	1	GTAG	NA	ANCHOR_UNIQUE,CANONICAL,CIRCULAR,PERFECT_EXT,UNAMBIGUOUS_BP
X	153454393	153457228	5circ_000665	2	-	1	2	40	35	T02	2	0	0	1	GTAG	NA	ANCHOR_UNIQUE,CANONICAL,CIRCULAR,PERFECT_EXT,UNAMBIGUOUS_BP
19	49994936	49995185	5circ_000666	41	-	15	40	40	40	T02	41	2	0	1	GTAG	NA	ANCHOR_UNIQUE,CANONICAL,CIRCULAR,OK_EXT,UNAMBIGUOUS_BP
1	35104294	35110447	5circ_000668	3	+	1	3	40	5	T02	3	0	0	1	GTAG	NA	ANCHOR_UNIQUE,CANONICAL,CIRCULAR,PERFECT_EXT,UNAMBIGUOUS_BP
11	68803999	68812576	5circ_000669	4	-	2	4	40	40	T02	4	0	0	1	GTAG	NA	ANCHOR_UNIQUE,CANONICAL,CIRCULAR,PERFECT_EXT,UNAMBIGUOUS_BP
6	98899267	98934879	5circ_000670	2	-	2	1	40	5	T02	2	0	0	1	GTAG	NA	ANCHOR_UNIQUE,CANONICAL,CIRCULAR,PERFECT_EXT,UNAMBIGUOUS_BP
20	47236325	47239138	5circ_000671	8	-	2	8	40	40	T02	8	0	0	1	GTAG	NA	ANCHOR_UNIQUE,CANONICAL,CIRCULAR,PERFECT_EXT,UNAMBIGUOUS_BP
2	64572945	64585545	5circ_000672	6	+	3	5	40	5	T02	6	0	0	1	GTAG	NA	ANCHOR_UNIQUE,CANONICAL,CIRCULAR,PERFECT_EXT,UNAMBIGUOUS_BP
10	4830674	4860971	5circ_000673	2	+	1	2	5	40	T02	2	0	0	1	GTAG	NA	ANCHOR_UNIQUE,CANONICAL,CIRCULAR,PERFECT_EXT,UNAMBIGUOUS_BP
17	29079696	29081000	5circ_000674	3	-	3	3	5	5	T02	3	1	0	1	GTAG	NA	ANCHOR_UNIQUE,CANONICAL,CIRCULAR,GOOD_EXT,UNAMBIGUOUS_BP
6	143470960	143479198	5circ_000675	5	+	1	5	40	40	T02	5	0	0	1	GTAG	NA	ANCHOR_UNIQUE,CANONICAL,CIRCULAR,PERFECT_EXT,UNAMBIGUOUS_BP
12	117038982	117075340	5circ_000676	6	-	1	6	5	40	T02	6	0	0	1	GTAG	NA	ANCHOR_UNIQUE,CANONICAL,CIRCULAR,PERFECT_EXT,UNAMBIGUOUS_BP
10	12649653	12666810	5circ_000677	5	+	1	5	40	40	T02	5	0	0	1	GTAG	NA	ANCHOR_UNIQUE,CANONICAL,CIRCULAR,PERFECT_EXT,UNAMBIGUOUS_BP
16	53235184	53238586	5circ_000679	8	+	1	8	40	40	T02	8	0	0	1	GTAG	NA	ANCHOR_UNIQUE,CANONICAL,CIRCULAR,PERFECT_EXT,UNAMBIGUOUS_BP
22	28699837	28734727	5circ_000680	2	-	1	2	40	40	T02	2	0	0	1	GTAG	NA	ANCHOR_UNIQUE,CANONICAL,CIRCULAR,PERFECT_EXT,UNAMBIGUOUS_BP
17	81270917	81289808	5circ_000681	5	-	1	5	35	5	T02	5	0	0	1	GTAG	NA	ANCHOR_UNIQUE,CANONICAL,CIRCULAR,PERFECT_EXT,UNAMBIGUOUS_BP
1	42927044	42927808	5circ_000682	7	-	1	7	40	5	T02	7	0	0	1	GTAG	NA	ANCHOR_UNIQUE,CANONICAL,CIRCULAR,PERFECT_EXT,UNAMBIGUOUS_BP
3	51630271	51630931	5circ_000684	9	+	1	9	40	40	T02	9	0	0	1	GTAG	NA	ANCHOR_UNIQUE,CANONICAL,CIRCULAR,PERFECT_EXT,UNAMBIGUOUS_BP
9	68954821	68957211	5circ_000685	5	-	2	5	40	5	T02	5	0	0	1	GTAG	NA	ANCHOR_UNIQUE,CANONICAL,CIRCULAR,PERFECT_EXT,UNAMBIGUOUS_BP
11	17131915	17145942	5circ_000686	11	-	7	11	40	40	T02	11	0	0	1	GTAG	NA	ANCHOR_UNIQUE,CANONICAL,CIRCULAR,PERFECT_EXT,UNAMBIGUOUS_BP
9	131151735	131164144	5circ_000688	5	+	1	5	5	5	T02	5	0	0	1	GTAG	NA	ANCHOR_UNIQUE,CANONICAL,CIRCULAR,PERFECT_EXT,UNAMBIGUOUS_BP
17	81270524	81271024	5circ_000690	5	-	3	5	40	40	T02	5	0	0	1	GTAG	NA	ANCHOR_UNIQUE,CANONICAL,CIRCULAR,PERFECT_EXT,UNAMBIGUOUS_BP
12	109101901	109103611	5circ_000691	2	+	1	2	40	5	T02	2	0	0	1	GTAG	NA	ANCHOR_UNIQUE,CANONICAL,CIRCULAR,PERFECT_EXT,UNAMBIGUOUS_BP
17	63680110	63681899	5circ_000692	5	+	1	5	5	40	T02	5	0	0	1	GTAG	NA	ANCHOR_UNIQUE,CANONICAL,CIRCULAR,PERFECT_EXT,UNAMBIGUOUS_BP
10	110124016	110132400	5circ_000693	2	+	2	2	40	40	T02	2	0	0	1	GTAG	NA	ANCHOR_UNIQUE,CANONICAL,CIRCULAR,PERFECT_EXT,UNAMBIGUOUS_BP
15	41044903	41048276	5circ_000695	3	-	1	3	5	40	T02	3	0	0	1	GTAG	NA	ANCHOR_UNIQUE,CANONICAL,CIRCULAR,PERFECT_EXT,UNAMBIGUOUS_BP
12	112239051	112247076	5circ_000696	8	-	2	5	40	40	T02	8	0	0	1	GTAG	NA	ANCHOR_UNIQUE,CANONICAL,CIRCULAR,PERFECT_EXT,UNAMBIGUOUS_BP
20	44479967	44490111	5circ_000697	8	+	2	8	40	5	T02	8	0	0	1	GTAG	NA	ANCHOR_UNIQUE,CANONICAL,CIRCULAR,PERFECT_EXT,UNAMBIGUOUS_BP
2	33186855	33222151	5circ_000698	14	+	5	14	40	40	T02	14	0	0	1	GTAG	NA	ANCHOR_UNIQUE,CANONICAL,CIRCULAR,PERFECT_EXT,UNAMBIGUOUS_BP
X	41660438	41671530	5circ_000699	2	-	2	2	40	40	T02	2	0	0	1	GTAG	NA	ANCHOR_UNIQUE,CANONICAL,CIRCULAR,PERFECT_EXT,UNAMBIGUOUS_BP
1	15937162	15938006	5circ_000700	3	+	1	3	40	40	T02	3	0	0	1	GTAG	NA	ANCHOR_UNIQUE,CANONICAL,CIRCULAR,PERFECT_EXT,UNAMBIGUOUS_BP
3	172769006	172786574	5circ_000701	2	+	2	2	35	40	T02	2	0	0	1	GTAG	NA	ANCHOR_UNIQUE,CANONICAL,CIRCULAR,PERFECT_EXT,UNAMBIGUOUS_BP
3	121647318	121657352	5circ_000702	4	-	2	2	40	40	T02	4	0	0	1	GTAG	NA	ANCHOR_UNIQUE,CANONICAL,CIRCULAR,PERFECT_EXT,UNAMBIGUOUS_BP
7	152309965	152315338	5circ_000703	14	-	6	14	40	40	T02	14	0	0	1	GTAG	NA	ANCHOR_UNIQUE,CANONICAL,CIRCULAR,PERFECT_EXT,UNAMBIGUOUS_BP
16	16121974	16125911	5circ_000704	2	+	1	2	35	40	T02	2	0	0	1	GTAG	NA	ANCHOR_UNIQUE,CANONICAL,CIRCULAR,PERFECT_EXT,UNAMBIGUOUS_BP
13	95034604	95071853	5circ_000706	2	-	1	2	40	40	T02	2	0	0	1	GTAG	NA	ANCHOR_UNIQUE,CANONICAL,CIRCULAR,PERFECT_EXT,UNAMBIGUOUS_BP
16	16007815	16014628	5circ_000707	5	+	3	5	40	40	T02	5	0	0	1	GTAG	NA	ANCHOR_UNIQUE,CANONICAL,CIRCULAR,PERFECT_EXT,UNAMBIGUOUS_BP
17	5399551	5414134	5circ_000708	4	-	1	4	5	5	T02	4	0	0	1	GTAG	NA	ANCHOR_UNIQUE,CANONICAL,CIRCULAR,PERFECT_EXT,UNAMBIGUOUS_BP
7	139575127	139575976	5circ_000709	5	-	1	5	5	5	T02	5	0	0	1	GTAG	NA	ANCHOR_UNIQUE,CANONICAL,CIRCULAR,PERFECT_EXT,UNAMBIGUOUS_BP
14	75699187	75720703	5circ_000710	2	+	1	2	40	40	T02	2	0	0	1	GTAG	NA	ANCHOR_UNIQUE,CANONICAL,CIRCULAR,PERFECT_EXT,UNAMBIGUOUS_BP
7	29030576	29072423	5circ_000713	9	-	3	9	40	40	T02	9	0	0	1	GTAG	NA	ANCHOR_UNIQUE,CANONICAL,CIRCULAR,PERFECT_EXT,UNAMBIGUOUS_BP
2	201344169	201351451	5circ_000714	50	-	19	50	40	40	T02	50	0	0	1	GTAG	NA	ANCHOR_UNIQUE,CANONICAL,CIRCULAR,PERFECT_EXT,UNAMBIGUOUS_BP
5	73058437	73077493	5circ_000715	10	+	4	10	40	40	T02	10	0	0	1	GTAG	NA	ANCHOR_UNIQUE,CANONICAL,CIRCULAR,PERFECT_EXT,UNAMBIGUOUS_BP
13	45516142	45525051	5circ_000716	4	+	2	4	5	40	T02	4	0	0	1	GTAG	NA	ANCHOR_UNIQUE,CANONICAL,CIRCULAR,PERFECT_EXT,UNAMBIGUOUS_BP
6	18185771	18188002	5circ_000717	2	+	1	2	40	40	T02	2	0	0	1	GTAG	NA	ANCHOR_UNIQUE,CANONICAL,CIRCULAR,PERFECT_EXT,UNAMBIGUOUS_BP
17	82763964	82783714	5circ_000718	3	+	1	3	5	40	T02	3	0	0	1	GTAG	NA	ANCHOR_UNIQUE,CANONICAL,CIRCULAR,PERFECT_EXT,UNAMBIGUOUS_BP
3	138688874	138694907	5circ_000720	2	-	2	2	40	40	T02	2	0	0	1	GTAG	NA	ANCHOR_UNIQUE,CANONICAL,CIRCULAR,PERFECT_EXT,UNAMBIGUOUS_BP
2	231083566	231084671	5circ_000721	2	+	2	2	40	5	T02	2	0	0	1	GTAG	NA	ANCHOR_UNIQUE,CANONICAL,CIRCULAR,PERFECT_EXT,UNAMBIGUOUS_BP
5	126914929	126918227	5circ_000722	22	-	7	22	40	40	T02	22	0	0	1	GTAG	NA	ANCHOR_UNIQUE,CANONICAL,CIRCULAR,PERFECT_EXT,UNAMBIGUOUS_BP
17	8238030	8238629	5circ_000723	21	-	8	21	40	40	T02	21	0	0	1	GTAG	NA	ANCHOR_UNIQUE,CANONICAL,CIRCULAR,PERFECT_EXT,UNAMBIGUOUS_BP
9	19288595	19300331	5circ_000724	2	+	1	2	5	5	T02	2	0	0	1	GTAG	NA	ANCHOR_UNIQUE,CANONICAL,CIRCULAR,PERFECT_EXT,UNAMBIGUOUS_BP
11	16097608	16186955	5circ_000725	3	-	2	3	5	40	T02	3	0	0	1	GTAG	NA	ANCHOR_UNIQUE,CANONICAL,CIRCULAR,PERFECT_EXT,UNAMBIGUOUS_BP
17	19785936	19796282	5circ_000726	2	-	1	2	40	40	T02	2	0	0	1	GTAG	NA	ANCHOR_UNIQUE,CANONICAL,CIRCULAR,PERFECT_EXT,UNAMBIGUOUS_BP
3	138570317	138572984	5circ_000727	2	-	2	2	5	40	T02	2	1	0	1	GTAG	NA	ANCHOR_UNIQUE,CANONICAL,CIRCULAR,GOOD_EXT,UNAMBIGUOUS_BP
17	18285141	18285520	5circ_000728	2	-	2	1	40	5	T02	2	0	0	1	GTAG	NA	ANCHOR_UNIQUE,CANONICAL,CIRCULAR,PERFECT_EXT,UNAMBIGUOUS_BP
4	139137629	139139497	5circ_000729	30	-	11	30	40	40	T02	30	0	0	1	GTAG	NA	ANCHOR_UNIQUE,CANONICAL,CIRCULAR,PERFECT_EXT,UNAMBIGUOUS_BP
11	31452717	31463305	5circ_000730	3	-	1	3	5	5	T02	3	1	0	1	GTAG	NA	ANCHOR_UNIQUE,CANONICAL,CIRCULAR,GOOD_EXT,UNAMBIGUOUS_BP
1	97700189	97720926	5circ_000731	4	-	2	4	5	5	T02	4	0	0	1	GTAG	NA	ANCHOR_UNIQUE,CANONICAL,CIRCULAR,PERFECT_EXT,UNAMBIGUOUS_BP
19	1218416	1223172	5circ_000732	2	+	1	2	40	40	T02	2	0	0	1	GTAG	NA	ANCHOR_UNIQUE,CANONICAL,CIRCULAR,PERFECT_EXT,UNAMBIGUOUS_BP
12	76845708	76849470	5circ_000733	3	+	1	3	40	5	T02	3	0	0	1	GTAG	NA	ANCHOR_UNIQUE,CANONICAL,CIRCULAR,PERFECT_EXT,UNAMBIGUOUS_BP
22	41808874	41810000	5circ_000734	2	+	2	2	40	40	T02	2	0	0	1	GTAG	NA	ANCHOR_UNIQUE,CANONICAL,CIRCULAR,PERFECT_EXT,UNAMBIGUOUS_BP
22	41170405	41173784	5circ_000735	2	+	2	2	40	40	T02	2	0	0	1	GTAG	NA	ANCHOR_UNIQUE,CANONICAL,CIRCULAR,PERFECT_EXT,UNAMBIGUOUS_BP
13	48166275	48220482	5circ_000736	2	-	1	2	5	40	T02	2	0	0	1	GTAG	NA	ANCHOR_UNIQUE,CANONICAL,CIRCULAR,PERFECT_EXT,UNAMBIGUOUS_BP
2	23798137	23823569	5circ_000737	7	-	3	7	5	40	T02	7	0	0	1	GTAG	NA	ANCHOR_UNIQUE,CANONICAL,CIRCULAR,PERFECT_EXT,UNAMBIGUOUS_BP
17	42498923	42501304	5circ_000738	155	+	38	152	40	40	T02	155	0	0	1	GTAG	NA	ANCHOR_UNIQUE,CANONICAL,CIRCULAR,PERFECT_EXT,UNAMBIGUOUS_BP
15	65478879	65480399	5circ_000739	5	-	1	5	40	40	T02	5	0	0	1	GTAG	NA	ANCHOR_UNIQUE,CANONICAL,CIRCULAR,PERFECT_EXT,UNAMBIGUOUS_BP
6	13637807	13644729	5circ_000740	4	-	2	4	40	40	T02	4	0	0	1	GTAG	NA	ANCHOR_UNIQUE,CANONICAL,CIRCULAR,PERFECT_EXT,UNAMBIGUOUS_BP
20	49084025	49089746	5circ_000741	5	+	3	5	40	40	T02	5	0	0	1	GTAG	NA	ANCHOR_UNIQUE,CANONICAL,CIRCULAR,PERFECT_EXT,UNAMBIGUOUS_BP
11	34090178	34092056	5circ_000742	7	+	5	7	40	40	T02	7	0	0	1	GTAG	NA	ANCHOR_UNIQUE,CANONICAL,CIRCULAR,PERFECT_EXT,UNAMBIGUOUS_BP
12	128814774	128815070	5circ_000743	4	-	1	4	40	40	T02	4	0	0	1	GTAG	NA	ANCHOR_UNIQUE,CANONICAL,CIRCULAR,PERFECT_EXT,UNAMBIGUOUS_BP
11	85981128	86003451	5circ_000744	2	-	1	2	40	5	T02	2	1	0	1	GTAG	NA	ANCHOR_UNIQUE,CANONICAL,CIRCULAR,GOOD_EXT,UNAMBIGUOUS_BP
X	17093800	17138961	5circ_000745	3	+	1	3	40	40	T02	3	0	0	1	GTAG	NA	ANCHOR_UNIQUE,CANONICAL,CIRCULAR,PERFECT_EXT,UNAMBIGUOUS_BP
1	246327200	246335474	5circ_000746	2	-	1	2	5	40	T02	2	0	0	1	GTAG	NA	ANCHOR_UNIQUE,CANONICAL,CIRCULAR,PERFECT_EXT,UNAMBIGUOUS_BP
7	6466070	6466323	5circ_000747	5	-	1	5	40	40	T02	5	1	0	1	GTAG	NA	ANCHOR_UNIQUE,CANONICAL,CIRCULAR,GOOD_EXT,UNAMBIGUOUS_BP
2	45461274	45477075	5circ_000748	2	-	1	2	5	40	T02	2	0	0	1	GTAG	NA	ANCHOR_UNIQUE,CANONICAL,CIRCULAR,PERFECT_EXT,UNAMBIGUOUS_BP
15	63622814	63628815	5circ_000749	2	-	1	2	5	40	T02	2	0	0	1	GTAG	NA	ANCHOR_UNIQUE,CANONICAL,CIRCULAR,PERFECT_EXT,UNAMBIGUOUS_BP
6	42455944	42456999	5circ_000751	2	+	1	2	40	40	T02	2	0	0	1	GTAG	NA	ANCHOR_UNIQUE,CANONICAL,CIRCULAR,PERFECT_EXT,UNAMBIGUOUS_BP
1	185214262	185231708	5circ_000752	3	+	3	2	5	40	T02	3	0	0	1	GTAG	NA	ANCHOR_UNIQUE,CANONICAL,CIRCULAR,PERFECT_EXT,UNAMBIGUOUS_BP
17	74243373	74250357	5circ_000753	4	+	1	4	5	5	T02	4	1	0	1	GTAG	NA	ANCHOR_UNIQUE,CANONICAL,CIRCULAR,GOOD_EXT,UNAMBIGUOUS_BP
2	54982514	54987698	5circ_000754	6	-	3	6	40	40	T02	6	0	0	1	GTAG	NA	ANCHOR_UNIQUE,CANONICAL,CIRCULAR,PERFECT_EXT,UNAMBIGUOUS_BP
18	196636	203190	5circ_000755	14	+	5	14	40	40	T02	14	0	0	1	GTAG	NA	ANCHOR_UNIQUE,CANONICAL,CIRCULAR,PERFECT_EXT,UNAMBIGUOUS_BP
4	148023262	148047051	5circ_000756	10	+	2	10	40	40	T02	10	0	0	1	GTAG	NA	ANCHOR_UNIQUE,CANONICAL,CIRCULAR,PERFECT_EXT,UNAMBIGUOUS_BP
7	100111727	100112253	5circ_000757	2	-	1	2	40	40	T02	2	0	0	1	GTAG	NA	ANCHOR_UNIQUE,CANONICAL,CIRCULAR,PERFECT_EXT,UNAMBIGUOUS_BP
15	63655741	63658718	5circ_000758	4	-	3	4	5	40	T02	4	0	0	1	GTAG	NA	ANCHOR_UNIQUE,CANONICAL,CIRCULAR,PERFECT_EXT,UNAMBIGUOUS_BP
17	78091439	78093763	5circ_000759	3	+	1	3	40	5	T02	3	0	0	1	GTAG	NA	ANCHOR_UNIQUE,CANONICAL,CIRCULAR,PERFECT_EXT,UNAMBIGUOUS_BP
6	137194405	137195075	5circ_000760	2	-	1	2	5	40	T02	2	0	0	1	GTAG	NA	ANCHOR_UNIQUE,CANONICAL,CIRCULAR,PERFECT_EXT,UNAMBIGUOUS_BP
5	126878184	126918227	5circ_000761	5	-	2	4	40	40	T02	5	0	0	1	GTAG	NA	ANCHOR_UNIQUE,CANONICAL,CIRCULAR,PERFECT_EXT,UNAMBIGUOUS_BP
22	45700281	45729590	5circ_000762	6	+	2	6	40	40	T02	6	0	0	1	GTAG	NA	ANCHOR_UNIQUE,CANONICAL,CIRCULAR,PERFECT_EXT,UNAMBIGUOUS_BP
1	26257596	26259802	5circ_000763	12	+	7	11	40	40	T02	12	0	0	1	GTAG	NA	ANCHOR_UNIQUE,CANONICAL,CIRCULAR,PERFECT_EXT,UNAMBIGUOUS_BP
2	26278613	26280115	5circ_000764	10	+	6	7	40	5	T02	10	0	0	1	GTAG	NA	ANCHOR_UNIQUE,CANONICAL,CIRCULAR,PERFECT_EXT,UNAMBIGUOUS_BP
2	126568962	126577065	5circ_000765	2	-	1	2	5	5	T02	2	0	0	1	GTAG	NA	ANCHOR_UNIQUE,CANONICAL,CIRCULAR,PERFECT_EXT,UNAMBIGUOUS_BP
5	178229939	178231523	5circ_000766	3	-	1	3	40	40	T02	3	0	0	1	GTAG	NA	ANCHOR_UNIQUE,CANONICAL,CIRCULAR,PERFECT_EXT,UNAMBIGUOUS_BP
6	108567171	108569742	5circ_000767	5	+	3	3	40	40	T02	5	0	0	1	GTAG	NA	ANCHOR_UNIQUE,CANONICAL,CIRCULAR,PERFECT_EXT,UNAMBIGUOUS_BP
19	35019190	35019533	5circ_000768	4	+	1	4	40	40	T02	4	0	0	1	GTAG	NA	ANCHOR_UNIQUE,CANONICAL,CIRCULAR,PERFECT_EXT,UNAMBIGUOUS_BP
9	120820838	120821464	5circ_000769	4	-	1	4	40	5	T02	4	0	0	1	GTAG	NA	ANCHOR_UNIQUE,CANONICAL,CIRCULAR,PERFECT_EXT,UNAMBIGUOUS_BP
13	40981982	41014221	5circ_000770	4	-	1	4	5	5	T02	4	1	0	1	GTAG	NA	ANCHOR_UNIQUE,CANONICAL,CIRCULAR,GOOD_EXT,UNAMBIGUOUS_BP
1	155853275	155853806	5circ_000772	14	-	5	14	40	40	T02	14	0	0	1	GTAG	NA	ANCHOR_UNIQUE,CANONICAL,CIRCULAR,PERFECT_EXT,UNAMBIGUOUS_BP
3	138221925	138223733	5circ_000773	9	+	4	9	40	40	T02	9	0	0	1	GTAG	NA	ANCHOR_UNIQUE,CANONICAL,CIRCULAR,PERFECT_EXT,UNAMBIGUOUS_BP
16	56939894	56942237	5circ_000774	4	+	2	4	40	40	T02	4	0	0	1	GTAG	NA	ANCHOR_UNIQUE,CANONICAL,CIRCULAR,PERFECT_EXT,UNAMBIGUOUS_BP
3	152299404	152300367	5circ_000775	14	+	3	14	40	40	T02	14	0	0	1	GTAG	NA	ANCHOR_UNIQUE,CANONICAL,CIRCULAR,PERFECT_EXT,UNAMBIGUOUS_BP
16	74632522	74636577	5circ_000776	4	-	2	4	40	40	T02	4	1	0	1	GTAG	NA	ANCHOR_UNIQUE,CANONICAL,CIRCULAR,GOOD_EXT,UNAMBIGUOUS_BP
22	41342532	41343576	5circ_000777	7	+	1	7	5	40	T02	7	0	0	1	GTAG	NA	ANCHOR_UNIQUE,CANONICAL,CIRCULAR,PERFECT_EXT,UNAMBIGUOUS_BP
10	13659322	13675044	5circ_000778	9	-	4	8	40	40	T02	9	0	0	1	GTAG	NA	ANCHOR_UNIQUE,CANONICAL,CIRCULAR,PERFECT_EXT,UNAMBIGUOUS_BP
19	11113277	11113762	5circ_000779	7	+	3	7	40	40	T02	7	0	0	1	GTAG	NA	ANCHOR_UNIQUE,CANONICAL,CIRCULAR,PERFECT_EXT,UNAMBIGUOUS_BP
21	43878054	43904019	5circ_000780	2	+	1	2	5	5	T02	2	0	0	1	GTAG	NA	ANCHOR_UNIQUE,CANONICAL,CIRCULAR,PERFECT_EXT,UNAMBIGUOUS_BP
13	60467237	60485948	5circ_000781	2	+	1	2	40	40	T02	2	0	0	1	GTAG	NA	ANCHOR_UNIQUE,CANONICAL,CIRCULAR,PERFECT_EXT,UNAMBIGUOUS_BP
15	65737706	65761438	5circ_000782	2	-	1	2	5	5	T02	2	0	0	1	GTAG	NA	ANCHOR_UNIQUE,CANONICAL,CIRCULAR,PERFECT_EXT,UNAMBIGUOUS_BP
11	44919311	44919806	5circ_000784	3	-	1	3	40	5	T02	3	1	0	1	GTAG	NA	ANCHOR_UNIQUE,CANONICAL,CIRCULAR,GOOD_EXT,UNAMBIGUOUS_BP
X	30854115	30871801	5circ_000787	3	-	1	3	40	35	T02	3	0	0	1	GTAG	NA	ANCHOR_UNIQUE,CANONICAL,CIRCULAR,PERFECT_EXT,UNAMBIGUOUS_BP
1	17333269	17334009	5circ_000788	4	+	2	4	5	40	T02	4	1	0	1	GTAG	NA	ANCHOR_UNIQUE,CANONICAL,CIRCULAR,GOOD_EXT,UNAMBIGUOUS_BP
X	48459535	48459876	5circ_000789	28	-	5	28	40	40	T02	28	0	0	1	GTAG	NA	ANCHOR_UNIQUE,CANONICAL,CIRCULAR,PERFECT_EXT,UNAMBIGUOUS_BP
20	34424479	34440344	5circ_000790	3	+	1	3	40	40	T02	3	0	0	1	GTAG	NA	ANCHOR_UNIQUE,CANONICAL,CIRCULAR,PERFECT_EXT,UNAMBIGUOUS_BP
13	114040999	114076154	5circ_000791	10	-	3	10	40	40	T02	10	0	0	1	GTAG	NA	ANCHOR_UNIQUE,CANONICAL,CIRCULAR,PERFECT_EXT,UNAMBIGUOUS_BP
17	43521368	43522226	5circ_000792	33	+	13	33	40	40	T02	33	0	0	1	GTAG	NA	ANCHOR_UNIQUE,CANONICAL,CIRCULAR,PERFECT_EXT,UNAMBIGUOUS_BP
X	153956190	153956411	5circ_000795	3	-	2	3	40	40	T02	3	0	0	1	GTAG	NA	ANCHOR_UNIQUE,CANONICAL,CIRCULAR,PERFECT_EXT,UNAMBIGUOUS_BP
14	50145169	50150230	5circ_000797	4	-	1	4	35	40	T02	4	0	2	1	GTAG	NA	ANCHOR_UNIQUE,CANONICAL,CIRCULAR,OK_EXT,UNAMBIGUOUS_BP
19	12876179	12878834	5circ_000798	14	-	4	14	40	35	T02	14	0	0	1	GTAG	NA	ANCHOR_UNIQUE,CANONICAL,CIRCULAR,PERFECT_EXT,UNAMBIGUOUS_BP
2	24563903	24564430	5circ_000799	3	+	1	3	40	5	T02	3	0	0	1	GTAG	NA	ANCHOR_UNIQUE,CANONICAL,CIRCULAR,PERFECT_EXT,UNAMBIGUOUS_BP
5	178204814	178210272	5circ_000800	2	+	1	2	40	40	T02	2	0	0	1	GTAG	NA	ANCHOR_UNIQUE,CANONICAL,CIRCULAR,PERFECT_EXT,UNAMBIGUOUS_BP
1	167332469	167338258	5circ_000802	13	+	2	13	40	5	T02	13	0	0	1	GTAG	NA	ANCHOR_UNIQUE,CANONICAL,CIRCULAR,PERFECT_EXT,UNAMBIGUOUS_BP
19	47289997	47292173	5circ_000803	4	+	1	4	5	5	T02	4	0	0	1	GTAG	NA	ANCHOR_UNIQUE,CANONICAL,CIRCULAR,PERFECT_EXT,UNAMBIGUOUS_BP
5	65451474	65473952	5circ_000804	4	-	2	4	40	5	T02	4	0	0	1	GTAG	NA	ANCHOR_UNIQUE,CANONICAL,CIRCULAR,PERFECT_EXT,UNAMBIGUOUS_BP
10	31373017	31461237	5circ_000805	2	+	1	2	40	5	T02	2	0	0	1	GTAG	NA	ANCHOR_UNIQUE,CANONICAL,CIRCULAR,PERFECT_EXT,UNAMBIGUOUS_BP
7	30561465	30562128	5circ_000806	2	-	1	2	40	5	T02	2	0	0	1	GTAG	NA	ANCHOR_UNIQUE,CANONICAL,CIRCULAR,PERFECT_EXT,UNAMBIGUOUS_BP
2	26364301	26375148	5circ_000807	5	+	1	5	5	5	T02	5	0	0	1	GTAG	NA	ANCHOR_UNIQUE,CANONICAL,CIRCULAR,PERFECT_EXT,UNAMBIGUOUS_BP
19	11178344	11178720	5circ_000808	53	-	24	51	40	40	T02	53	0	0	1	GTAG	NA	ANCHOR_UNIQUE,CANONICAL,CIRCULAR,PERFECT_EXT,UNAMBIGUOUS_BP
11	3683199	3695606	5circ_000809	2	-	2	2	40	5	T02	2	1	0	1	GTAG	NA	ANCHOR_UNIQUE,CANONICAL,CIRCULAR,GOOD_EXT,UNAMBIGUOUS_BP
7	26684735	26704713	5circ_000811	3	-	1	3	40	40	T02	3	0	0	1	GTAG	NA	ANCHOR_UNIQUE,CANONICAL,CIRCULAR,PERFECT_EXT,UNAMBIGUOUS_BP
17	60269449	60288682	5circ_000812	2	-	2	2	40	40	T02	2	0	0	1	GTAG	NA	ANCHOR_UNIQUE,CANONICAL,CIRCULAR,PERFECT_EXT,UNAMBIGUOUS_BP
18	23524171	23524415	5circ_000813	6	-	1	6	40	40	T02	6	2	0	1	GTAG	NA	ANCHOR_UNIQUE,CANONICAL,CIRCULAR,OK_EXT,UNAMBIGUOUS_BP
16	27701588	27708920	5circ_000814	7	+	3	7	40	40	T02	7	0	0	1	GTAG	NA	ANCHOR_UNIQUE,CANONICAL,CIRCULAR,PERFECT_EXT,UNAMBIGUOUS_BP
10	4830674	4873307	5circ_000815	13	+	1	13	40	5	T02	13	0	0	1	GTAG	NA	ANCHOR_UNIQUE,CANONICAL,CIRCULAR,PERFECT_EXT,UNAMBIGUOUS_BP
11	62535944	62536567	5circ_000816	2	-	1	2	5	40	T02	2	0	0	1	GTAG	NA	ANCHOR_UNIQUE,CANONICAL,CIRCULAR,PERFECT_EXT,UNAMBIGUOUS_BP
16	78424869	78432752	5circ_000817	8	+	2	8	40	40	T02	8	0	0	1	GTAG	NA	ANCHOR_UNIQUE,CANONICAL,CIRCULAR,PERFECT_EXT,UNAMBIGUOUS_BP
17	67166477	67167796	5circ_000820	2	-	2	2	5	40	T02	2	0	0	1	GTAG	NA	ANCHOR_UNIQUE,CANONICAL,CIRCULAR,PERFECT_EXT,UNAMBIGUOUS_BP
20	34575103	34588607	5circ_000821	4	-	2	4	40	5	T02	4	0	0	1	GTAG	NA	ANCHOR_UNIQUE,CANONICAL,CIRCULAR,PERFECT_EXT,UNAMBIGUOUS_BP
4	102304316	102324998	5circ_000822	4	-	4	4	40	35	T02	4	0	0	1	GTAG	NA	ANCHOR_UNIQUE,CANONICAL,CIRCULAR,PERFECT_EXT,UNAMBIGUOUS_BP
16	19644885	19652090	5circ_000823	3	+	2	3	5	5	T02	3	0	0	1	GTAG	NA	ANCHOR_UNIQUE,CANONICAL,CIRCULAR,PERFECT_EXT,UNAMBIGUOUS_BP
16	71667177	71672322	5circ_000824	4	-	2	4	5	40	T02	4	0	0	1	GTAG	NA	ANCHOR_UNIQUE,CANONICAL,CIRCULAR,PERFECT_EXT,UNAMBIGUOUS_BP
16	69776188	69799295	5circ_000825	6	+	1	6	40	5	T02	6	0	0	1	GTAG	NA	ANCHOR_UNIQUE,CANONICAL,CIRCULAR,PERFECT_EXT,UNAMBIGUOUS_BP
7	44666735	44681848	5circ_000826	4	+	1	4	40	40	T02	4	0	0	1	GTAG	NA	ANCHOR_UNIQUE,CANONICAL,CIRCULAR,PERFECT_EXT,UNAMBIGUOUS_BP
19	8548035	8555796	5circ_000828	8	-	1	8	40	40	T02	8	0	0	1	GTAG	NA	ANCHOR_UNIQUE,CANONICAL,CIRCULAR,PERFECT_EXT,UNAMBIGUOUS_BP
5	71517321	71524323	5circ_000829	2	+	1	2	5	5	T02	2	0	0	1	GTAG	NA	ANCHOR_UNIQUE,CANONICAL,CIRCULAR,PERFECT_EXT,UNAMBIGUOUS_BP
7	5345561	5352094	5circ_000830	2	-	1	2	5	5	T02	2	0	0	1	GTAG	NA	ANCHOR_UNIQUE,CANONICAL,CIRCULAR,PERFECT_EXT,UNAMBIGUOUS_BP
6	5404541	5431172	5circ_000831	3	+	2	3	40	40	T02	3	0	0	1	GTAG	NA	ANCHOR_UNIQUE,CANONICAL,CIRCULAR,PERFECT_EXT,UNAMBIGUOUS_BP
13	21155692	21158125	5circ_000832	2	-	1	2	5	5	T02	2	0	0	1	GTAG	NA	ANCHOR_UNIQUE,CANONICAL,CIRCULAR,PERFECT_EXT,UNAMBIGUOUS_BP
4	87084119	87108315	5circ_000833	2	+	1	2	40	5	T02	2	0	0	1	GTAG	NA	ANCHOR_UNIQUE,CANONICAL,CIRCULAR,PERFECT_EXT,UNAMBIGUOUS_BP
4	6586995	6589160	5circ_000834	2	+	1	2	40	40	T02	2	0	0	1	GTAG	NA	ANCHOR_UNIQUE,CANONICAL,CIRCULAR,PERFECT_EXT,UNAMBIGUOUS_BP
1	224393827	224411565	5circ_000836	2	-	2	2	5	40	T02	2	0	0	1	GTAG	NA	ANCHOR_UNIQUE,CANONICAL,CIRCULAR,PERFECT_EXT,UNAMBIGUOUS_BP
17	44154555	44155411	5circ_000837	15	+	7	14	40	40	T02	15	0	0	1	GTAG	NA	ANCHOR_UNIQUE,CANONICAL,CIRCULAR,PERFECT_EXT,UNAMBIGUOUS_BP
3	47425484	47428670	5circ_000839	39	-	13	39	40	40	T02	39	0	0	1	GTAG	NA	ANCHOR_UNIQUE,CANONICAL,CIRCULAR,PERFECT_EXT,UNAMBIGUOUS_BP
14	49602369	49608121	5circ_000840	3	+	2	3	40	5	T02	3	0	0	1	GTAG	NA	ANCHOR_UNIQUE,CANONICAL,CIRCULAR,PERFECT_EXT,UNAMBIGUOUS_BP
6	87663002	87667173	5circ_000841	2	+	2	2	5	5	T02	2	0	0	1	GTAG	NA	ANCHOR_UNIQUE,CANONICAL,CIRCULAR,PERFECT_EXT,UNAMBIGUOUS_BP
3	196064308	196069568	5circ_000845	37	-	14	37	40	40	T02	37	0	0	1	GTAG	NA	ANCHOR_UNIQUE,CANONICAL,CIRCULAR,PERFECT_EXT,UNAMBIGUOUS_BP
3	136730945	136731878	5circ_000846	2	+	1	2	40	5	T02	2	1	0	1	GTAG	NA	ANCHOR_UNIQUE,CANONICAL,CIRCULAR,GOOD_EXT,UNAMBIGUOUS_BP
13	51960147	51968607	5circ_000847	6	-	2	6	40	40	T02	6	0	0	1	GTAG	NA	ANCHOR_UNIQUE,CANONICAL,CIRCULAR,PERFECT_EXT,UNAMBIGUOUS_BP
17	12081355	12113360	5circ_000848	3	+	1	3	5	5	T02	3	0	0	1	GTAG	NA	ANCHOR_UNIQUE,CANONICAL,CIRCULAR,PERFECT_EXT,UNAMBIGUOUS_BP
1	50705785	50781044	5circ_000849	2	-	1	2	5	5	T02	2	0	0	1	GTAG	NA	ANCHOR_UNIQUE,CANONICAL,CIRCULAR,PERFECT_EXT,UNAMBIGUOUS_BP
11	76463903	76472840	5circ_000851	3	+	1	3	40	40	T02	3	0	0	1	GTAG	NA	ANCHOR_UNIQUE,CANONICAL,CIRCULAR,PERFECT_EXT,UNAMBIGUOUS_BP
9	93471140	93476338	5circ_000852	33	+	11	32	40	40	T02	33	0	0	1	GTAG	NA	ANCHOR_UNIQUE,CANONICAL,CIRCULAR,PERFECT_EXT,UNAMBIGUOUS_BP
12	11121009	11133367	5circ_000855	2	-	2	2	5	5	T02	2	0	0	1	GTAG	NA	ANCHOR_UNIQUE,CANONICAL,CIRCULAR,PERFECT_EXT,UNAMBIGUOUS_BP
21	36247516	36248568	5circ_000857	67	+	25	67	40	40	T02	67	0	0	1	GTAG	NA	ANCHOR_UNIQUE,CANONICAL,CIRCULAR,PERFECT_EXT,UNAMBIGUOUS_BP
20	48951322	48953790	5circ_000858	24	+	6	24	40	40	T02	24	0	0	1	GTAG	NA	ANCHOR_UNIQUE,CANONICAL,CIRCULAR,PERFECT_EXT,UNAMBIGUOUS_BP
12	110012004	110019328	5circ_000859	2	+	1	2	5	5	T02	2	0	0	1	GTAG	NA	ANCHOR_UNIQUE,CANONICAL,CIRCULAR,PERFECT_EXT,UNAMBIGUOUS_BP
14	73282358	73287314	5circ_000860	24	-	5	24	40	40	T02	24	0	0	1	GTAG	NA	ANCHOR_UNIQUE,CANONICAL,CIRCULAR,PERFECT_EXT,UNAMBIGUOUS_BP
2	196789203	196793152	5circ_000861	2	-	1	2	40	40	T02	2	0	0	1	GTAG	NA	ANCHOR_UNIQUE,CANONICAL,CIRCULAR,PERFECT_EXT,UNAMBIGUOUS_BP
3	47046486	47067118	5circ_000863	12	-	4	12	40	40	T02	12	0	0	1	GTAG	NA	ANCHOR_UNIQUE,CANONICAL,CIRCULAR,PERFECT_EXT,UNAMBIGUOUS_BP
1	61109777	61159155	5circ_000864	8	+	2	8	40	40	T02	8	0	0	1	GTAG	NA	ANCHOR_UNIQUE,CANONICAL,CIRCULAR,PERFECT_EXT,UNAMBIGUOUS_BP
19	18061121	18064010	5circ_000865	4	-	2	4	40	40	T02	4	0	0	1	GTAG	NA	ANCHOR_UNIQUE,CANONICAL,CIRCULAR,PERFECT_EXT,UNAMBIGUOUS_BP
16	74477395	74483124	5circ_000866	2	-	1	2	40	35	T02	2	0	0	1	GTAG	NA	ANCHOR_UNIQUE,CANONICAL,CIRCULAR,PERFECT_EXT,UNAMBIGUOUS_BP
18	22992747	23001729	5circ_000867	4	+	1	4	40	5	T02	4	0	0	1	GTAG	NA	ANCHOR_UNIQUE,CANONICAL,CIRCULAR,PERFECT_EXT,UNAMBIGUOUS_BP
3	47736033	47772936	5circ_000868	2	-	1	2	5	40	T02	2	0	0	1	GTAG	NA	ANCHOR_UNIQUE,CANONICAL,CIRCULAR,PERFECT_EXT,UNAMBIGUOUS_BP
2	74159090	74172752	5circ_000869	3	-	2	2	5	5	T02	3	0	0	1	GTAG	NA	ANCHOR_UNIQUE,CANONICAL,CIRCULAR,PERFECT_EXT,UNAMBIGUOUS_BP
12	117004435	117010450	5circ_000870	3	+	1	3	35	40	T02	3	0	0	1	GTAG	NA	ANCHOR_UNIQUE,CANONICAL,CIRCULAR,PERFECT_EXT,UNAMBIGUOUS_BP
9	37147361	37191680	5circ_000872	2	+	1	2	5	40	T02	2	0	0	1	GTAG	NA	ANCHOR_UNIQUE,CANONICAL,CIRCULAR,PERFECT_EXT,UNAMBIGUOUS_BP
1	54036609	54043525	5circ_000873	8	-	4	8	40	40	T02	8	0	0	1	GTAG	NA	ANCHOR_UNIQUE,CANONICAL,CIRCULAR,PERFECT_EXT,UNAMBIGUOUS_BP
2	240499957	240520533	5circ_000874	4	-	1	4	40	5	T02	4	0	0	1	GTAG	NA	ANCHOR_UNIQUE,CANONICAL,CIRCULAR,PERFECT_EXT,UNAMBIGUOUS_BP
7	16258389	16308627	5circ_000875	8	-	2	8	5	40	T02	8	0	0	1	GTAG	NA	ANCHOR_UNIQUE,CANONICAL,CIRCULAR,PERFECT_EXT,UNAMBIGUOUS_BP
6	133980081	133987168	5circ_000876	7	+	2	7	40	40	T02	7	0	0	1	GTAG	NA	ANCHOR_UNIQUE,CANONICAL,CIRCULAR,PERFECT_EXT,UNAMBIGUOUS_BP
15	44606024	44608605	5circ_000879	2	-	1	2	40	5	T02	2	0	0	1	GTAG	NA	ANCHOR_UNIQUE,CANONICAL,CIRCULAR,PERFECT_EXT,UNAMBIGUOUS_BP
X	19588642	19595000	5circ_000880	5	-	1	5	40	40	T02	5	0	0	1	GTAG	NA	ANCHOR_UNIQUE,CANONICAL,CIRCULAR,PERFECT_EXT,UNAMBIGUOUS_BP
7	79413819	79435221	5circ_000881	2	-	1	2	5	40	T02	2	0	0	1	GTAG	NA	ANCHOR_UNIQUE,CANONICAL,CIRCULAR,PERFECT_EXT,UNAMBIGUOUS_BP
12	49042560	49048769	5circ_000883	4	-	1	4	40	40	T02	4	0	0	1	GTAG	NA	ANCHOR_UNIQUE,CANONICAL,CIRCULAR,PERFECT_EXT,UNAMBIGUOUS_BP
14	92142163	92143503	5circ_000884	2	+	1	2	40	40	T02	2	0	0	1	GTAG	NA	ANCHOR_UNIQUE,CANONICAL,CIRCULAR,PERFECT_EXT,UNAMBIGUOUS_BP
5	79645122	79669028	5circ_000885	8	+	3	8	40	40	T02	8	0	0	1	GTAG	NA	ANCHOR_UNIQUE,CANONICAL,CIRCULAR,PERFECT_EXT,UNAMBIGUOUS_BP
3	25751097	25778688	5circ_000887	5	-	1	5	40	40	T02	5	0	0	1	GTAG	NA	ANCHOR_UNIQUE,CANONICAL,CIRCULAR,PERFECT_EXT,UNAMBIGUOUS_BP
22	38144895	38145653	5circ_000888	17	-	8	15	40	40	T02	17	0	0	1	GTAG	NA	ANCHOR_UNIQUE,CANONICAL,CIRCULAR,PERFECT_EXT,UNAMBIGUOUS_BP
11	47261240	47262018	5circ_000889	6	+	4	6	40	40	T02	6	0	0	1	GTAG	NA	ANCHOR_UNIQUE,CANONICAL,CIRCULAR,PERFECT_EXT,UNAMBIGUOUS_BP
8	47836337	47837419	5circ_000891	7	-	6	7	40	40	T02	7	0	0	1	GTAG	NA	ANCHOR_UNIQUE,CANONICAL,CIRCULAR,PERFECT_EXT,UNAMBIGUOUS_BP
21	36247516	36251284	5circ_000892	7	+	3	7	40	5	T02	7	0	0	1	GTAG	NA	ANCHOR_UNIQUE,CANONICAL,CIRCULAR,PERFECT_EXT,UNAMBIGUOUS_BP
1	28683582	28710642	5circ_000893	2	+	1	2	5	5	T02	2	0	0	1	GTAG	NA	ANCHOR_UNIQUE,CANONICAL,CIRCULAR,PERFECT_EXT,UNAMBIGUOUS_BP
15	42810613	42840433	5circ_000894	4	-	2	4	5	40	T02	4	0	0	1	GTAG	NA	ANCHOR_UNIQUE,CANONICAL,CIRCULAR,PERFECT_EXT,UNAMBIGUOUS_BP
21	43903956	43959859	5circ_000895	6	+	2	6	5	40	T02	6	0	0	1	GTAG	NA	ANCHOR_UNIQUE,CANONICAL,CIRCULAR,PERFECT_EXT,UNAMBIGUOUS_BP
2	25767582	25771540	5circ_000896	18	-	5	18	40	35	T02	18	0	0	1	GTAG	NA	ANCHOR_UNIQUE,CANONICAL,CIRCULAR,PERFECT_EXT,UNAMBIGUOUS_BP
4	139889356	139890967	5circ_000897	8	-	4	8	40	40	T02	8	0	0	1	GTAG	NA	ANCHOR_UNIQUE,CANONICAL,CIRCULAR,PERFECT_EXT,UNAMBIGUOUS_BP
1	45334390	45334967	5circ_000898	5	-	2	5	40	40	T02	5	0	0	1	GTAG	NA	ANCHOR_UNIQUE,CANONICAL,CIRCULAR,PERFECT_EXT,UNAMBIGUOUS_BP
8	89980338	89982855	5circ_000899	3	-	2	3	36	5	T02	3	0	0	1	GTAG	NA	ANCHOR_UNIQUE,CANONICAL,CIRCULAR,PERFECT_EXT,UNAMBIGUOUS_BP
4	17822982	17831116	5circ_000901	3	+	1	3	5	5	T02	3	0	0	1	GTAG	NA	ANCHOR_UNIQUE,CANONICAL,CIRCULAR,PERFECT_EXT,UNAMBIGUOUS_BP
1	32948221	32949774	5circ_000902	26	-	8	26	40	40	T02	26	0	0	1	GTAG	NA	ANCHOR_UNIQUE,CANONICAL,CIRCULAR,PERFECT_EXT,UNAMBIGUOUS_BP
6	30491653	30492403	5circ_000903	5	+	1	5	5	5	T02	5	0	0	1	GTAG	NA	ANCHOR_UNIQUE,CANONICAL,CIRCULAR,PERFECT_EXT,UNAMBIGUOUS_BP
15	101217998	101235577	5circ_000904	3	-	1	3	5	40	T02	3	0	0	1	GTAG	NA	ANCHOR_UNIQUE,CANONICAL,CIRCULAR,PERFECT_EXT,UNAMBIGUOUS_BP
3	179362357	179377448	5circ_000906	2	+	1	2	35	5	T02	2	0	0	1	GTAG	NA	ANCHOR_UNIQUE,CANONICAL,CIRCULAR,PERFECT_EXT,UNAMBIGUOUS_BP
11	68544837	68558679	5circ_000908	8	+	3	8	40	5	T02	8	0	0	1	GTAG	NA	ANCHOR_UNIQUE,CANONICAL,CIRCULAR,PERFECT_EXT,UNAMBIGUOUS_BP
13	95832926	95837202	5circ_000910	3	-	1	3	40	40	T02	3	0	0	1	GTAG	NA	ANCHOR_UNIQUE,CANONICAL,CIRCULAR,PERFECT_EXT,UNAMBIGUOUS_BP
1	89712708	89719075	5circ_000911	5	+	1	5	5	5	T02	5	0	0	1	GTAG	NA	ANCHOR_UNIQUE,CANONICAL,CIRCULAR,PERFECT_EXT,UNAMBIGUOUS_BP
16	1397177	1401701	5circ_000912	3	-	1	3	40	5	T02	3	0	0	1	GTAG	NA	ANCHOR_UNIQUE,CANONICAL,CIRCULAR,PERFECT_EXT,UNAMBIGUOUS_BP
22	29825086	29832342	5circ_000913	6	-	3	6	40	35	T02	6	0	0	1	GTAG	NA	ANCHOR_UNIQUE,CANONICAL,CIRCULAR,PERFECT_EXT,UNAMBIGUOUS_BP
22	39138635	39141436	5circ_000914	14	-	7	14	40	40	T02	14	0	0	1	GTAG	NA	ANCHOR_UNIQUE,CANONICAL,CIRCULAR,PERFECT_EXT,UNAMBIGUOUS_BP
17	82468763	82481211	5circ_000915	2	+	1	2	5	5	T02	2	0	0	1	GTAG	NA	ANCHOR_UNIQUE,CANONICAL,CIRCULAR,PERFECT_EXT,UNAMBIGUOUS_BP
2	241242459	241249980	5circ_000916	12	-	3	12	40	40	T02	12	0	0	1	GTAG	NA	ANCHOR_UNIQUE,CANONICAL,CIRCULAR,PERFECT_EXT,UNAMBIGUOUS_BP
16	58716013	58722278	5circ_000917	10	-	2	5	40	5	T02	10	0	0	1	GTAG	NA	ANCHOR_UNIQUE,CANONICAL,CIRCULAR,PERFECT_EXT,UNAMBIGUOUS_BP
8	125147080	125195272	5circ_000918	2	+	2	2	37	40	T02	2	0	0	1	GTAG	NA	ANCHOR_UNIQUE,CANONICAL,CIRCULAR,PERFECT_EXT,UNAMBIGUOUS_BP
19	51573209	51588078	5circ_000919	7	+	2	4	40	40	T02	7	0	0	1	GTAG	NA	ANCHOR_UNIQUE,CANONICAL,CIRCULAR,PERFECT_EXT,UNAMBIGUOUS_BP
3	112563384	112570670	5circ_000920	2	+	1	2	40	5	T02	2	0	0	1	GTAG	NA	ANCHOR_UNIQUE,CANONICAL,CIRCULAR,PERFECT_EXT,UNAMBIGUOUS_BP
18	57562873	57573365	5circ_000921	7	-	3	7	40	40	T02	7	0	0	1	GTAG	NA	ANCHOR_UNIQUE,CANONICAL,CIRCULAR,PERFECT_EXT,UNAMBIGUOUS_BP
18	62539680	62550460	5circ_000922	27	+	9	25	40	40	T02	27	0	0	1	GTAG	NA	ANCHOR_UNIQUE,CANONICAL,CIRCULAR,PERFECT_EXT,UNAMBIGUOUS_BP
17	46094559	46172232	5circ_000923	4	-	1	4	5	40	T02	4	0	0	1	GTAG	NA	ANCHOR_UNIQUE,CANONICAL,CIRCULAR,PERFECT_EXT,UNAMBIGUOUS_BP
1	45640209	45642499	5circ_000924	712	-	92	685	40	40	T02	712	0	0	1	GTAG	NA	ANCHOR_UNIQUE,CANONICAL,CIRCULAR,PERFECT_EXT,UNAMBIGUOUS_BP
10	72340788	72341170	5circ_000925	2	-	2	2	40	40	T02	2	0	0	1	GTAG	NA	ANCHOR_UNIQUE,CANONICAL,CIRCULAR,PERFECT_EXT,UNAMBIGUOUS_BP
7	1898199	1936897	5circ_000926	7	-	1	7	40	40	T02	7	0	0	1	GTAG	NA	ANCHOR_UNIQUE,CANONICAL,CIRCULAR,PERFECT_EXT,UNAMBIGUOUS_BP
19	15268904	15273133	5circ_000927	3	-	1	3	5	40	T02	3	0	0	1	GTAG	NA	ANCHOR_UNIQUE,CANONICAL,CIRCULAR,PERFECT_EXT,UNAMBIGUOUS_BP
16	18841564	18845651	5circ_000929	21	-	7	21	40	40	T02	21	0	0	1	GTAG	NA	ANCHOR_UNIQUE,CANONICAL,CIRCULAR,PERFECT_EXT,UNAMBIGUOUS_BP
4	82939538	82939962	5circ_000931	2	-	1	2	5	5	T02	2	0	0	1	GTAG	NA	ANCHOR_UNIQUE,CANONICAL,CIRCULAR,PERFECT_EXT,UNAMBIGUOUS_BP
1	117402185	117414831	5circ_000932	7	+	3	5	40	35	T02	7	0	0	1	GTAG	NA	ANCHOR_UNIQUE,CANONICAL,CIRCULAR,PERFECT_EXT,UNAMBIGUOUS_BP
9	112574056	112575251	5circ_000933	12	+	3	12	40	40	T02	12	0	0	1	GTAG	NA	ANCHOR_UNIQUE,CANONICAL,CIRCULAR,PERFECT_EXT,UNAMBIGUOUS_BP
18	62070378	62109973	5circ_000934	4	-	1	4	40	40	T02	4	0	0	1	GTAG	NA	ANCHOR_UNIQUE,CANONICAL,CIRCULAR,PERFECT_EXT,UNAMBIGUOUS_BP
3	133623090	133624175	5circ_000936	2	-	1	2	5	40	T02	2	0	0	1	GTAG	NA	ANCHOR_UNIQUE,CANONICAL,CIRCULAR,PERFECT_EXT,UNAMBIGUOUS_BP
20	49165996	49174269	5circ_000937	13	-	5	13	40	40	T02	13	0	0	1	GTAG	NA	ANCHOR_UNIQUE,CANONICAL,CIRCULAR,PERFECT_EXT,UNAMBIGUOUS_BP
1	33159687	33159944	5circ_000938	2	-	1	2	5	40	T02	2	0	0	1	GTAG	NA	ANCHOR_UNIQUE,CANONICAL,CIRCULAR,PERFECT_EXT,UNAMBIGUOUS_BP
1	45640209	45659142	5circ_000939	4	-	3	4	40	40	T02	4	0	0	1	GTAG	NA	ANCHOR_UNIQUE,CANONICAL,CIRCULAR,PERFECT_EXT,UNAMBIGUOUS_BP
4	128959599	129003876	5circ_000942	6	-	2	6	40	40	T02	6	0	0	1	GTAG	NA	ANCHOR_UNIQUE,CANONICAL,CIRCULAR,PERFECT_EXT,UNAMBIGUOUS_BP
10	863742	890829	5circ_000943	2	-	1	2	40	5	T02	2	0	0	1	GTAG	NA	ANCHOR_UNIQUE,CANONICAL,CIRCULAR,PERFECT_EXT,UNAMBIGUOUS_BP
22	41154994	41157408	5circ_000944	2	+	2	2	40	5	T02	2	1	0	1	GTAG	NA	ANCHOR_UNIQUE,CANONICAL,CIRCULAR,GOOD_EXT,UNAMBIGUOUS_BP
11	5225533	5226775	5circ_000945	2	+	2	1	40	5	T02	2	1	0	1	GTAG	NA	ANCHOR_UNIQUE,CANONICAL,CIRCULAR,GOOD_EXT,UNAMBIGUOUS_BP
17	78160954	78161254	5circ_000946	6	+	3	6	40	40	T02	6	0	0	1	GTAG	NA	ANCHOR_UNIQUE,CANONICAL,CIRCULAR,PERFECT_EXT,UNAMBIGUOUS_BP
13	112547619	112571114	5circ_000947	2	-	2	2	5	5	T02	2	0	0	1	GTAG	NA	ANCHOR_UNIQUE,CANONICAL,CIRCULAR,PERFECT_EXT,UNAMBIGUOUS_BP
10	69359896	69369624	5circ_000948	4	+	2	4	5	40	T02	4	0	0	1	GTAG	NA	ANCHOR_UNIQUE,CANONICAL,CIRCULAR,PERFECT_EXT,UNAMBIGUOUS_BP
22	26496072	26496889	5circ_000950	8	-	1	8	40	40	T02	8	0	0	1	GTAG	NA	ANCHOR_UNIQUE,CANONICAL,CIRCULAR,PERFECT_EXT,UNAMBIGUOUS_BP
3	148586121	148593369	5circ_000951	7	-	1	7	40	5	T02	7	2	0	1	GTAG	NA	ANCHOR_UNIQUE,CANONICAL,CIRCULAR,OK_EXT,UNAMBIGUOUS_BP
8	100527844	100529860	5circ_000953	2	-	1	2	40	5	T02	2	0	0	1	GTAG	NA	ANCHOR_UNIQUE,CANONICAL,CIRCULAR,PERFECT_EXT,UNAMBIGUOUS_BP
17	31993864	31995762	5circ_000955	2	+	1	2	40	2	T02	2	0	1	1	GTAG	NA	ANCHOR_UNIQUE,CANONICAL,CIRCULAR,GOOD_EXT,UNAMBIGUOUS_BP
1	93183359	93192106	5circ_000957	2	+	1	2	5	5	T02	2	0	0	1	GTAG	NA	ANCHOR_UNIQUE,CANONICAL,CIRCULAR,PERFECT_EXT,UNAMBIGUOUS_BP
8	97699753	97723035	5circ_000958	6	+	2	6	40	5	T02	6	0	0	1	GTAG	NA	ANCHOR_UNIQUE,CANONICAL,CIRCULAR,PERFECT_EXT,UNAMBIGUOUS_BP
17	21006895	21011309	5circ_000959	15	-	7	7	40	40	T02	15	0	0	1	GTAG	NA	ANCHOR_UNIQUE,CANONICAL,CIRCULAR,PERFECT_EXT,UNAMBIGUOUS_BP
10	45625950	45627105	5circ_000961	10	-	4	10	40	40	T02	10	0	0	1	GTAG	NA	ANCHOR_UNIQUE,CANONICAL,CIRCULAR,PERFECT_EXT,UNAMBIGUOUS_BP
5	178214905	178215270	5circ_000962	9	-	1	9	5	5	T02	9	2	0	1	GTAG	NA	ANCHOR_UNIQUE,CANONICAL,CIRCULAR,OK_EXT,UNAMBIGUOUS_BP
3	155914418	155919338	5circ_000964	4	+	2	4	40	40	T02	4	0	0	1	GTAG	NA	ANCHOR_UNIQUE,CANONICAL,CIRCULAR,PERFECT_EXT,UNAMBIGUOUS_BP
20	35672754	35690565	5circ_000965	6	-	1	6	40	40	T02	6	0	0	1	GTAG	NA	ANCHOR_UNIQUE,CANONICAL,CIRCULAR,PERFECT_EXT,UNAMBIGUOUS_BP
18	77095367	77097474	5circ_000966	5	-	2	5	5	5	T02	5	0	0	1	GTAG	NA	ANCHOR_UNIQUE,CANONICAL,CIRCULAR,PERFECT_EXT,UNAMBIGUOUS_BP
1	25988230	25990863	5circ_000967	4	-	1	4	5	40	T02	4	0	0	1	GTAG	NA	ANCHOR_UNIQUE,CANONICAL,CIRCULAR,PERFECT_EXT,UNAMBIGUOUS_BP
1	154550628	154551004	5circ_000968	10	-	2	10	40	40	T02	10	0	0	1	GTAG	NA	ANCHOR_UNIQUE,CANONICAL,CIRCULAR,PERFECT_EXT,UNAMBIGUOUS_BP
19	47362475	47362693	5circ_000970	3	+	1	3	40	5	T02	3	0	0	1	GTAG	NA	ANCHOR_UNIQUE,CANONICAL,CIRCULAR,PERFECT_EXT,UNAMBIGUOUS_BP
14	55350380	55352870	5circ_000971	2	+	1	2	35	5	T02	2	0	0	1	GTAG	NA	ANCHOR_UNIQUE,CANONICAL,CIRCULAR,PERFECT_EXT,UNAMBIGUOUS_BP
1	58527260	58539310	5circ_000972	3	-	1	3	40	5	T02	3	1	0	1	GTAG	NA	ANCHOR_UNIQUE,CANONICAL,CIRCULAR,GOOD_EXT,UNAMBIGUOUS_BP
16	70466881	70471352	5circ_000973	11	+	2	11	40	40	T02	11	0	0	1	GTAG	NA	ANCHOR_UNIQUE,CANONICAL,CIRCULAR,PERFECT_EXT,UNAMBIGUOUS_BP
4	77157236	77157574	5circ_000974	6	+	1	6	35	5	T02	6	0	0	1	GTAG	NA	ANCHOR_UNIQUE,CANONICAL,CIRCULAR,PERFECT_EXT,UNAMBIGUOUS_BP
2	218549808	218562813	5circ_000975	3	-	1	3	40	5	T02	3	0	0	1	GTAG	NA	ANCHOR_UNIQUE,CANONICAL,CIRCULAR,PERFECT_EXT,UNAMBIGUOUS_BP
8	21974669	21985691	5circ_000976	3	+	1	3	5	40	T02	3	0	0	1	GTAG	NA	ANCHOR_UNIQUE,CANONICAL,CIRCULAR,PERFECT_EXT,UNAMBIGUOUS_BP
5	177238236	177239865	5circ_000977	7	+	2	7	40	5	T02	7	0	0	1	GTAG	NA	ANCHOR_UNIQUE,CANONICAL,CIRCULAR,PERFECT_EXT,UNAMBIGUOUS_BP
1	19193432	19199754	5circ_000978	2	-	1	2	40	40	T02	2	0	0	1	GTAG	NA	ANCHOR_UNIQUE,CANONICAL,CIRCULAR,PERFECT_EXT,UNAMBIGUOUS_BP
15	58886974	58887540	5circ_000979	13	-	7	13	40	40	T02	13	0	0	1	GTAG	NA	ANCHOR_UNIQUE,CANONICAL,CIRCULAR,PERFECT_EXT,UNAMBIGUOUS_BP
5	39002534	39021136	5circ_000980	4	-	2	4	40	40	T02	4	0	0	1	GTAG	NA	ANCHOR_UNIQUE,CANONICAL,CIRCULAR,PERFECT_EXT,UNAMBIGUOUS_BP
7	130026157	130039547	5circ_000981	2	-	2	2	5	5	T02	2	0	0	1	GTAG	NA	ANCHOR_UNIQUE,CANONICAL,CIRCULAR,PERFECT_EXT,UNAMBIGUOUS_BP
11	16183885	16186955	5circ_000982	22	-	5	22	40	40	T02	22	0	0	1	GTAG	NA	ANCHOR_UNIQUE,CANONICAL,CIRCULAR,PERFECT_EXT,UNAMBIGUOUS_BP
5	135343259	135370142	5circ_000985	3	-	1	3	5	35	T02	3	0	0	1	GTAG	NA	ANCHOR_UNIQUE,CANONICAL,CIRCULAR,PERFECT_EXT,UNAMBIGUOUS_BP
18	47091173	47097404	5circ_000986	6	-	2	6	5	40	T02	6	0	0	1	GTAG	NA	ANCHOR_UNIQUE,CANONICAL,CIRCULAR,PERFECT_EXT,UNAMBIGUOUS_BP
3	32395191	32442013	5circ_000988	3	+	1	3	40	40	T02	3	0	0	1	GTAG	NA	ANCHOR_UNIQUE,CANONICAL,CIRCULAR,PERFECT_EXT,UNAMBIGUOUS_BP
2	239156651	239251200	5circ_000989	2	-	1	2	40	40	T02	2	0	0	1	GTAG	NA	ANCHOR_UNIQUE,CANONICAL,CIRCULAR,PERFECT_EXT,UNAMBIGUOUS_BP
15	90481959	90484352	5circ_000990	13	+	4	13	40	40	T02	13	0	0	1	GTAG	NA	ANCHOR_UNIQUE,CANONICAL,CIRCULAR,PERFECT_EXT,UNAMBIGUOUS_BP
16	28152658	28156527	5circ_000991	2	-	1	2	5	5	T02	2	0	0	1	GTAG	NA	ANCHOR_UNIQUE,CANONICAL,CIRCULAR,PERFECT_EXT,UNAMBIGUOUS_BP
5	171213618	171242820	5circ_000992	3	+	1	3	40	40	T02	3	0	0	1	GTAG	NA	ANCHOR_UNIQUE,CANONICAL,CIRCULAR,PERFECT_EXT,UNAMBIGUOUS_BP
3	17508473	17586466	5circ_000994	8	-	5	6	40	40	T02	8	0	0	1	GTAG	NA	ANCHOR_UNIQUE,CANONICAL,CIRCULAR,PERFECT_EXT,UNAMBIGUOUS_BP
2	171448680	171473975	5circ_000995	9	+	3	9	40	40	T02	9	0	0	1	GTAG	NA	ANCHOR_UNIQUE,CANONICAL,CIRCULAR,PERFECT_EXT,UNAMBIGUOUS_BP
1	52396045	52397863	5circ_000996	10	-	2	10	40	40	T02	10	0	0	1	GTAG	NA	ANCHOR_UNIQUE,CANONICAL,CIRCULAR,PERFECT_EXT,UNAMBIGUOUS_BP
3	196065442	196069568	5circ_000997	19	-	5	19	40	40	T02	19	0	0	1	GTAG	NA	ANCHOR_UNIQUE,CANONICAL,CIRCULAR,PERFECT_EXT,UNAMBIGUOUS_BP
1	33280123	33280457	5circ_000998	9	+	5	9	40	40	T02	9	0	0	1	GTAG	NA	ANCHOR_UNIQUE,CANONICAL,CIRCULAR,PERFECT_EXT,UNAMBIGUOUS_BP
19	41378280	41378519	5circ_001001	6	+	2	5	5	5	T02	6	0	0	1	GTAG	NA	ANCHOR_UNIQUE,CANONICAL,CIRCULAR,PERFECT_EXT,UNAMBIGUOUS_BP
X	110020351	110020663	5circ_001002	10	+	2	10	40	40	T02	10	0	0	1	GTAG	NA	ANCHOR_UNIQUE,CANONICAL,CIRCULAR,PERFECT_EXT,UNAMBIGUOUS_BP
14	49647292	49655843	5circ_001003	3	-	1	3	5	40	T02	3	0	0	1	GTAG	NA	ANCHOR_UNIQUE,CANONICAL,CIRCULAR,PERFECT_EXT,UNAMBIGUOUS_BP
13	37033448	37045373	5circ_001004	3	-	1	3	40	5	T02	3	0	0	1	GTAG	NA	ANCHOR_UNIQUE,CANONICAL,CIRCULAR,PERFECT_EXT,UNAMBIGUOUS_BP
22	41135812	41140257	5circ_001006	30	+	15	29	40	40	T02	30	0	0	1	GTAG	NA	ANCHOR_UNIQUE,CANONICAL,CIRCULAR,PERFECT_EXT,UNAMBIGUOUS_BP
17	74762011	74763520	5circ_001008	2	+	2	2	40	40	T02	2	0	0	1	GTAG	NA	ANCHOR_UNIQUE,CANONICAL,CIRCULAR,PERFECT_EXT,UNAMBIGUOUS_BP
15	29053844	29054835	5circ_001009	3	+	2	2	40	5	T02	3	0	0	1	GTAG	NA	ANCHOR_UNIQUE,CANONICAL,CIRCULAR,PERFECT_EXT,UNAMBIGUOUS_BP
9	33351559	33352719	5circ_001010	20	+	10	19	40	40	T02	20	0	0	1	GTAG	NA	ANCHOR_UNIQUE,CANONICAL,CIRCULAR,PERFECT_EXT,UNAMBIGUOUS_BP
9	94415157	94441099	5circ_001011	3	+	2	2	5	40	T02	3	0	0	1	GTAG	NA	ANCHOR_UNIQUE,CANONICAL,CIRCULAR,PERFECT_EXT,UNAMBIGUOUS_BP
19	54142928	54146657	5circ_001012	2	+	1	2	40	40	T02	2	0	0	1	GTAG	NA	ANCHOR_UNIQUE,CANONICAL,CIRCULAR,PERFECT_EXT,UNAMBIGUOUS_BP
1	23050386	23059167	5circ_001014	4	+	2	4	40	40	T02	4	0	0	1	GTAG	NA	ANCHOR_UNIQUE,CANONICAL,CIRCULAR,PERFECT_EXT,UNAMBIGUOUS_BP
18	9583116	9595153	5circ_001015	5	-	4	4	40	40	T02	5	0	0	1	GTAG	NA	ANCHOR_UNIQUE,CANONICAL,CIRCULAR,PERFECT_EXT,UNAMBIGUOUS_BP
7	100351251	100355240	5circ_001016	4	+	1	4	40	5	T02	4	0	0	1	GTAG	NA	ANCHOR_UNIQUE,CANONICAL,CIRCULAR,PERFECT_EXT,UNAMBIGUOUS_BP
9	93077845	93079602	5circ_001017	8	+	3	8	40	40	T02	8	0	0	1	GTAG	NA	ANCHOR_UNIQUE,CANONICAL,CIRCULAR,PERFECT_EXT,UNAMBIGUOUS_BP
3	53497151	53501720	5circ_001019	10	+	2	9	40	5	T02	10	0	0	1	GTAG	NA	ANCHOR_UNIQUE,CANONICAL,CIRCULAR,PERFECT_EXT,UNAMBIGUOUS_BP
12	112306063	112314546	5circ_001020	10	-	2	7	40	5	T02	10	0	0	1	GTAG	NA	ANCHOR_UNIQUE,CANONICAL,CIRCULAR,PERFECT_EXT,UNAMBIGUOUS_BP
11	73707419	73718718	5circ_001021	8	-	4	5	5	40	T02	8	0	0	1	GTAG	NA	ANCHOR_UNIQUE,CANONICAL,CIRCULAR,PERFECT_EXT,UNAMBIGUOUS_BP
6	24806366	24835871	5circ_001022	12	-	3	12	40	40	T02	12	0	0	1	GTAG	NA	ANCHOR_UNIQUE,CANONICAL,CIRCULAR,PERFECT_EXT,UNAMBIGUOUS_BP
10	124681606	124706887	5circ_001023	5	-	2	5	40	40	T02	5	0	0	1	GTAG	NA	ANCHOR_UNIQUE,CANONICAL,CIRCULAR,PERFECT_EXT,UNAMBIGUOUS_BP
22	50372019	50394135	5circ_001024	26	+	11	26	40	40	T02	26	0	0	1	GTAG	NA	ANCHOR_UNIQUE,CANONICAL,CIRCULAR,PERFECT_EXT,UNAMBIGUOUS_BP
4	152960564	152968097	5circ_001025	2	+	1	2	40	5	T02	2	0	0	1	GTAG	NA	ANCHOR_UNIQUE,CANONICAL,CIRCULAR,PERFECT_EXT,UNAMBIGUOUS_BP
14	53091784	53093444	5circ_001026	2	-	1	2	40	40	T02	2	0	0	1	GTAG	NA	ANCHOR_UNIQUE,CANONICAL,CIRCULAR,PERFECT_EXT,UNAMBIGUOUS_BP
13	41811224	41819386	5circ_001028	35	-	10	35	40	40	T02	35	0	0	1	GTAG	NA	ANCHOR_UNIQUE,CANONICAL,CIRCULAR,PERFECT_EXT,UNAMBIGUOUS_BP
10	118685982	118730410	5circ_001030	8	-	4	8	40	40	T02	8	0	0	1	GTAG	NA	ANCHOR_UNIQUE,CANONICAL,CIRCULAR,PERFECT_EXT,UNAMBIGUOUS_BP
10	102872447	102873233	5circ_001031	5	+	1	5	5	40	T02	5	0	0	1	GTAG	NA	ANCHOR_UNIQUE,CANONICAL,CIRCULAR,PERFECT_EXT,UNAMBIGUOUS_BP
6	42852091	42855917	5circ_001032	3	+	1	3	40	35	T02	3	0	0	1	GTAG	NA	ANCHOR_UNIQUE,CANONICAL,CIRCULAR,PERFECT_EXT,UNAMBIGUOUS_BP
1	155239615	155240077	5circ_001033	10	-	5	6	40	40	T02	10	0	0	1	GTAG	NA	ANCHOR_UNIQUE,CANONICAL,CIRCULAR,PERFECT_EXT,UNAMBIGUOUS_BP
15	42983896	42990120	5circ_001038	4	-	1	4	40	40	T02	4	0	0	1	GTAG	NA	ANCHOR_UNIQUE,CANONICAL,CIRCULAR,PERFECT_EXT,UNAMBIGUOUS_BP
1	161751654	161752464	5circ_001039	3	+	1	3	5	5	T02	3	0	0	1	GTAG	NA	ANCHOR_UNIQUE,CANONICAL,CIRCULAR,PERFECT_EXT,UNAMBIGUOUS_BP
5	177050702	177064601	5circ_001040	4	+	2	4	40	40	T02	4	0	0	1	GTAG	NA	ANCHOR_UNIQUE,CANONICAL,CIRCULAR,PERFECT_EXT,UNAMBIGUOUS_BP
10	119580470	119580846	5circ_001041	7	-	3	7	5	40	T02	7	0	0	1	GTAG	NA	ANCHOR_UNIQUE,CANONICAL,CIRCULAR,PERFECT_EXT,UNAMBIGUOUS_BP
8	67299208	67301380	5circ_001042	2	-	1	2	5	5	T02	2	0	0	1	GTAG	NA	ANCHOR_UNIQUE,CANONICAL,CIRCULAR,PERFECT_EXT,UNAMBIGUOUS_BP
9	34096715	34107565	5circ_001043	2	-	1	2	5	5	T02	2	1	0	1	GTAG	NA	ANCHOR_UNIQUE,CANONICAL,CIRCULAR,GOOD_EXT,UNAMBIGUOUS_BP
16	81889171	81895927	5circ_001045	5	+	3	5	40	40	T02	5	1	0	1	GTAG	NA	ANCHOR_UNIQUE,CANONICAL,CIRCULAR,GOOD_EXT,UNAMBIGUOUS_BP
9	112268048	112276013	5circ_001046	5	-	3	5	40	40	T02	5	0	0	1	GTAG	NA	ANCHOR_UNIQUE,CANONICAL,CIRCULAR,PERFECT_EXT,UNAMBIGUOUS_BP
9	85669484	85712566	5circ_001047	3	-	3	3	40	40	T02	3	0	0	1	GTAG	NA	ANCHOR_UNIQUE,CANONICAL,CIRCULAR,PERFECT_EXT,UNAMBIGUOUS_BP
5	95755361	95763620	5circ_001048	2	+	1	2	40	5	T02	2	0	0	1	GTAG	NA	ANCHOR_UNIQUE,CANONICAL,CIRCULAR,PERFECT_EXT,UNAMBIGUOUS_BP
3	128806591	128807519	5circ_001050	2	+	1	2	40	40	T02	2	2	0	1	GTAG	NA	ANCHOR_UNIQUE,CANONICAL,CIRCULAR,OK_EXT,UNAMBIGUOUS_BP
17	60255174	60288682	5circ_001051	13	-	4	13	40	40	T02	13	0	0	1	GTAG	NA	ANCHOR_UNIQUE,CANONICAL,CIRCULAR,PERFECT_EXT,UNAMBIGUOUS_BP
19	3547571	3547847	5circ_001053	3	-	1	3	40	40	T02	3	1	0	1	GTAG	NA	ANCHOR_UNIQUE,CANONICAL,CIRCULAR,GOOD_EXT,UNAMBIGUOUS_BP
11	111836164	111844723	5circ_001054	7	-	2	7	5	5	T02	7	0	0	1	GTAG	NA	ANCHOR_UNIQUE,CANONICAL,CIRCULAR,PERFECT_EXT,UNAMBIGUOUS_BP
5	151473672	151476980	5circ_001055	2	+	1	2	40	40	T02	2	0	0	1	GTAG	NA	ANCHOR_UNIQUE,CANONICAL,CIRCULAR,PERFECT_EXT,UNAMBIGUOUS_BP
15	92924320	92956649	5circ_001056	4	+	2	4	40	40	T02	4	0	0	1	GTAG	NA	ANCHOR_UNIQUE,CANONICAL,CIRCULAR,PERFECT_EXT,UNAMBIGUOUS_BP
2	226839408	226914351	5circ_001057	4	+	1	4	40	40	T02	4	0	0	1	GTAG	NA	ANCHOR_UNIQUE,CANONICAL,CIRCULAR,PERFECT_EXT,UNAMBIGUOUS_BP
17	7343378	7344648	5circ_001059	4	+	2	4	40	40	T02	4	0	0	1	GTAG	NA	ANCHOR_UNIQUE,CANONICAL,CIRCULAR,PERFECT_EXT,UNAMBIGUOUS_BP
17	40053297	40053635	5circ_001060	2	-	1	2	40	40	T02	2	0	0	1	GTAG	NA	ANCHOR_UNIQUE,CANONICAL,CIRCULAR,PERFECT_EXT,UNAMBIGUOUS_BP
10	31908171	31908926	5circ_001062	9	-	2	9	5	40	T02	9	0	0	1	GTAG	NA	ANCHOR_UNIQUE,CANONICAL,CIRCULAR,PERFECT_EXT,UNAMBIGUOUS_BP
15	94367604	94385525	5circ_001063	11	+	6	11	40	40	T02	11	0	0	1	GTAG	NA	ANCHOR_UNIQUE,CANONICAL,CIRCULAR,PERFECT_EXT,UNAMBIGUOUS_BP
17	30984616	30988106	5circ_001064	11	+	3	11	40	40	T02	11	0	0	1	GTAG	NA	ANCHOR_UNIQUE,CANONICAL,CIRCULAR,PERFECT_EXT,UNAMBIGUOUS_BP
16	19591789	19616808	5circ_001065	2	+	1	2	5	5	T02	2	0	0	1	GTAG	NA	ANCHOR_UNIQUE,CANONICAL,CIRCULAR,PERFECT_EXT,UNAMBIGUOUS_BP
3	44357740	44361518	5circ_001068	4	+	1	4	5	5	T02	4	0	0	1	GTAG	NA	ANCHOR_UNIQUE,CANONICAL,CIRCULAR,PERFECT_EXT,UNAMBIGUOUS_BP
17	37423508	37440662	5circ_001070	2	+	1	2	40	40	T02	2	0	0	1	GTAG	NA	ANCHOR_UNIQUE,CANONICAL,CIRCULAR,PERFECT_EXT,UNAMBIGUOUS_BP
17	35557002	35558106	5circ_001073	4	-	1	4	5	40	T02	4	0	0	1	GTAG	NA	ANCHOR_UNIQUE,CANONICAL,CIRCULAR,PERFECT_EXT,UNAMBIGUOUS_BP
3	3777724	3789074	5circ_001074	6	-	3	6	5	5	T02	6	0	0	1	GTAG	NA	ANCHOR_UNIQUE,CANONICAL,CIRCULAR,PERFECT_EXT,UNAMBIGUOUS_BP
9	36357774	36376127	5circ_001075	2	-	1	2	5	40	T02	2	0	0	1	GTAG	NA	ANCHOR_UNIQUE,CANONICAL,CIRCULAR,PERFECT_EXT,UNAMBIGUOUS_BP
18	2937691	2940712	5circ_001076	6	-	2	6	40	40	T02	6	0	0	1	GTAG	NA	ANCHOR_UNIQUE,CANONICAL,CIRCULAR,PERFECT_EXT,UNAMBIGUOUS_BP
5	145587324	145671554	5circ_001077	2	-	2	2	40	40	T02	2	0	0	1	GTAG	NA	ANCHOR_UNIQUE,CANONICAL,CIRCULAR,PERFECT_EXT,UNAMBIGUOUS_BP
3	108579280	108582202	5circ_001079	15	-	2	9	40	40	T02	15	0	0	1	GTAG	NA	ANCHOR_UNIQUE,CANONICAL,CIRCULAR,PERFECT_EXT,UNAMBIGUOUS_BP
15	99333922	99363265	5circ_001080	2	+	1	2	40	5	T02	2	0	0	1	GTAG	NA	ANCHOR_UNIQUE,CANONICAL,CIRCULAR,PERFECT_EXT,UNAMBIGUOUS_BP
16	71986220	71990329	5circ_001081	2	-	1	2	40	40	T02	2	0	1	1	GTAG	NA	ANCHOR_UNIQUE,CANONICAL,CIRCULAR,GOOD_EXT,UNAMBIGUOUS_BP
X	55009241	55026015	5circ_001082	4	-	1	4	5	40	T02	4	0	0	1	GTAG	NA	ANCHOR_UNIQUE,CANONICAL,CIRCULAR,PERFECT_EXT,UNAMBIGUOUS_BP
19	43744771	43748052	5circ_001083	7	-	3	7	40	40	T02	7	0	0	1	GTAG	NA	ANCHOR_UNIQUE,CANONICAL,CIRCULAR,PERFECT_EXT,UNAMBIGUOUS_BP
Y	13260277	13297848	5circ_001085	4	-	2	4	5	5	T02	4	0	0	1	GTAG	NA	ANCHOR_UNIQUE,CANONICAL,CIRCULAR,PERFECT_EXT,UNAMBIGUOUS_BP
2	32114637	32116212	5circ_001088	4	+	2	1	5	5	T02	4	0	0	1	GTAG	NA	ANCHOR_UNIQUE,CANONICAL,CIRCULAR,PERFECT_EXT,UNAMBIGUOUS_BP
3	151409242	151416422	5circ_001089	3	+	1	3	5	40	T02	3	0	0	1	GTAG	NA	ANCHOR_UNIQUE,CANONICAL,CIRCULAR,PERFECT_EXT,UNAMBIGUOUS_BP
1	200614317	200615609	5circ_001090	4	-	1	4	5	5	T02	4	0	0	1	GTAG	NA	ANCHOR_UNIQUE,CANONICAL,CIRCULAR,PERFECT_EXT,UNAMBIGUOUS_BP
17	81270917	81277133	5circ_001092	2	-	1	2	40	40	T02	2	0	0	1	GTAG	NA	ANCHOR_UNIQUE,CANONICAL,CIRCULAR,PERFECT_EXT,UNAMBIGUOUS_BP
19	1042745	1043841	5circ_001093	16	+	4	16	40	40	T02	16	0	0	1	GTAG	NA	ANCHOR_UNIQUE,CANONICAL,CIRCULAR,PERFECT_EXT,UNAMBIGUOUS_BP
16	910930	954666	5circ_001094	6	-	2	6	5	5	T02	6	0	0	1	GTAG	NA	ANCHOR_UNIQUE,CANONICAL,CIRCULAR,PERFECT_EXT,UNAMBIGUOUS_BP
11	113799145	113799415	5circ_001095	8	-	2	8	5	40	T02	8	0	0	1	GTAG	NA	ANCHOR_UNIQUE,CANONICAL,CIRCULAR,PERFECT_EXT,UNAMBIGUOUS_BP
15	63754504	63756748	5circ_001096	3	-	1	3	40	5	T02	3	0	0	1	GTAG	NA	ANCHOR_UNIQUE,CANONICAL,CIRCULAR,PERFECT_EXT,UNAMBIGUOUS_BP
6	144490070	144493456	5circ_001097	2	+	2	2	40	40	T02	2	0	0	1	GTAG	NA	ANCHOR_UNIQUE,CANONICAL,CIRCULAR,PERFECT_EXT,UNAMBIGUOUS_BP
4	155774967	155777642	5circ_001099	4	+	1	4	40	40	T02	4	0	0	1	GTAG	NA	ANCHOR_UNIQUE,CANONICAL,CIRCULAR,PERFECT_EXT,UNAMBIGUOUS_BP
14	22904874	22906368	5circ_001100	2	-	2	2	5	40	T02	2	0	0	1	GTAG	NA	ANCHOR_UNIQUE,CANONICAL,CIRCULAR,PERFECT_EXT,UNAMBIGUOUS_BP
16	92595	93325	5circ_001101	16	-	7	16	40	40	T02	16	0	0	1	GTAG	NA	ANCHOR_UNIQUE,CANONICAL,CIRCULAR,PERFECT_EXT,UNAMBIGUOUS_BP
20	44479984	44480444	5circ_001102	12	+	4	9	40	5	T02	12	0	0	1	GTAG	NA	ANCHOR_UNIQUE,CANONICAL,CIRCULAR,PERFECT_EXT,UNAMBIGUOUS_BP
3	196069454	196072152	5circ_001103	7	-	1	7	40	40	T02	7	0	0	1	GTAG	NA	ANCHOR_UNIQUE,CANONICAL,CIRCULAR,PERFECT_EXT,UNAMBIGUOUS_BP
8	141151618	141155970	5circ_001104	7	+	3	7	40	5	T02	7	0	0	1	GTAG	NA	ANCHOR_UNIQUE,CANONICAL,CIRCULAR,PERFECT_EXT,UNAMBIGUOUS_BP
1	26884124	26886133	5circ_001106	5	-	1	5	40	5	T02	5	0	0	1	GTAG	NA	ANCHOR_UNIQUE,CANONICAL,CIRCULAR,PERFECT_EXT,UNAMBIGUOUS_BP
15	94298200	94298730	5circ_001107	107	+	38	103	40	40	T02	107	0	0	1	GTAG	NA	ANCHOR_UNIQUE,CANONICAL,CIRCULAR,PERFECT_EXT,UNAMBIGUOUS_BP
16	74885652	74909657	5circ_001108	13	-	5	7	40	40	T02	13	0	0	1	GTAG	NA	ANCHOR_UNIQUE,CANONICAL,CIRCULAR,PERFECT_EXT,UNAMBIGUOUS_BP
6	13579450	13588464	5circ_001109	3	+	1	3	5	5	T02	3	0	0	1	GTAG	NA	ANCHOR_UNIQUE,CANONICAL,CIRCULAR,PERFECT_EXT,UNAMBIGUOUS_BP
15	65729071	65732818	5circ_001110	32	-	12	32	40	40	T02	32	0	0	1	GTAG	NA	ANCHOR_UNIQUE,CANONICAL,CIRCULAR,PERFECT_EXT,UNAMBIGUOUS_BP
20	47276313	47287284	5circ_001114	22	-	10	19	40	40	T02	22	0	0	1	GTAG	NA	ANCHOR_UNIQUE,CANONICAL,CIRCULAR,PERFECT_EXT,UNAMBIGUOUS_BP
2	201209069	201209562	5circ_001115	5	+	1	5	5	5	T02	5	0	0	1	GTAG	NA	ANCHOR_UNIQUE,CANONICAL,CIRCULAR,PERFECT_EXT,UNAMBIGUOUS_BP
22	49797804	49804360	5circ_001116	8	-	2	8	40	40	T02	8	0	0	1	GTAG	NA	ANCHOR_UNIQUE,CANONICAL,CIRCULAR,PERFECT_EXT,UNAMBIGUOUS_BP
X	37803876	37806533	5circ_001117	4	+	2	2	5	40	T02	4	0	0	1	GTAG	NA	ANCHOR_UNIQUE,CANONICAL,CIRCULAR,PERFECT_EXT,UNAMBIGUOUS_BP
1	247877133	247877664	5circ_001118	2	-	1	2	40	5	T02	2	2	0	1	GTAG	NA	ANCHOR_UNIQUE,CANONICAL,CIRCULAR,OK_EXT,UNAMBIGUOUS_BP
7	105563732	105565648	5circ_001119	14	+	3	14	5	5	T02	14	0	0	1	GTAG	NA	ANCHOR_UNIQUE,CANONICAL,CIRCULAR,PERFECT_EXT,UNAMBIGUOUS_BP
1	28560632	28561398	5circ_001121	3	+	1	3	5	35	T02	3	0	2	1	GTAG	NA	ANCHOR_UNIQUE,CANONICAL,CIRCULAR,OK_EXT,UNAMBIGUOUS_BP
22	44702491	44735162	5circ_001122	2	+	1	2	5	40	T02	2	0	0	1	GTAG	NA	ANCHOR_UNIQUE,CANONICAL,CIRCULAR,PERFECT_EXT,UNAMBIGUOUS_BP
8	123337624	123339446	5circ_001124	7	-	2	7	5	40	T02	7	0	0	1	GTAG	NA	ANCHOR_UNIQUE,CANONICAL,CIRCULAR,PERFECT_EXT,UNAMBIGUOUS_BP
13	114052051	114073837	5circ_001125	6	-	3	6	5	40	T02	6	0	0	1	GTAG	NA	ANCHOR_UNIQUE,CANONICAL,CIRCULAR,PERFECT_EXT,UNAMBIGUOUS_BP
3	30644746	30650460	5circ_001126	3	+	3	2	40	5	T02	3	0	0	1	GTAG	NA	ANCHOR_UNIQUE,CANONICAL,CIRCULAR,PERFECT_EXT,UNAMBIGUOUS_BP
1	8614560	8624380	5circ_001127	4	-	2	4	37	5	T02	4	0	0	1	GTAG	NA	ANCHOR_UNIQUE,CANONICAL,CIRCULAR,PERFECT_EXT,UNAMBIGUOUS_BP
11	16071713	16111926	5circ_001129	2	-	1	2	5	5	T02	2	1	0	1	GTAG	NA	ANCHOR_UNIQUE,CANONICAL,CIRCULAR,GOOD_EXT,UNAMBIGUOUS_BP
7	158788003	158798076	5circ_001131	2	-	1	2	40	40	T02	2	0	0	1	GTAG	NA	ANCHOR_UNIQUE,CANONICAL,CIRCULAR,PERFECT_EXT,UNAMBIGUOUS_BP
15	85113872	85121014	5circ_001132	4	+	2	4	40	5	T02	4	0	0	1	GTAG	NA	ANCHOR_UNIQUE,CANONICAL,CIRCULAR,PERFECT_EXT,UNAMBIGUOUS_BP
X	68111853	68119332	5circ_001133	2	-	1	2	40	40	T02	2	0	0	1	GTAG	NA	ANCHOR_UNIQUE,CANONICAL,CIRCULAR,PERFECT_EXT,UNAMBIGUOUS_BP
14	105855905	105856217	5circ_001134	3	-	1	3	40	40	T02	3	0	0	1	GTAG	NA	ANCHOR_UNIQUE,CANONICAL,CIRCULAR,PERFECT_EXT,UNAMBIGUOUS_BP
11	59942846	59947862	5circ_001135	2	+	1	2	5	5	T02	2	0	0	1	GTAG	NA	ANCHOR_UNIQUE,CANONICAL,CIRCULAR,PERFECT_EXT,UNAMBIGUOUS_BP
6	119188404	119248354	5circ_001136	2	-	2	2	40	40	T02	2	0	0	1	GTAG	NA	ANCHOR_UNIQUE,CANONICAL,CIRCULAR,PERFECT_EXT,UNAMBIGUOUS_BP
1	30974650	30988380	5circ_001138	4	-	1	4	40	5	T02	4	0	0	1	GTAG	NA	ANCHOR_UNIQUE,CANONICAL,CIRCULAR,PERFECT_EXT,UNAMBIGUOUS_BP
4	55417071	55418164	5circ_001139	6	+	2	6	5	5	T02	6	0	0	1	GTAG	NA	ANCHOR_UNIQUE,CANONICAL,CIRCULAR,PERFECT_EXT,UNAMBIGUOUS_BP
17	39490556	39509761	5circ_001140	2	+	1	2	5	40	T02	2	0	0	1	GTAG	NA	ANCHOR_UNIQUE,CANONICAL,CIRCULAR,PERFECT_EXT,UNAMBIGUOUS_BP
1	171574926	171577637	5circ_001141	2	+	1	2	40	40	T02	2	0	0	1	GTAG	NA	ANCHOR_UNIQUE,CANONICAL,CIRCULAR,PERFECT_EXT,UNAMBIGUOUS_BP
19	18001132	18002810	5circ_001142	3	-	1	3	40	40	T02	3	2	0	1	GTAG	NA	ANCHOR_UNIQUE,CANONICAL,CIRCULAR,OK_EXT,UNAMBIGUOUS_BP
2	183128286	183130545	5circ_001143	14	+	8	7	40	5	T02	14	0	0	1	GTAG	NA	ANCHOR_UNIQUE,CANONICAL,CIRCULAR,PERFECT_EXT,UNAMBIGUOUS_BP
20	56386256	56388202	5circ_001146	9	-	4	7	5	35	T02	9	0	0	1	GTAG	NA	ANCHOR_UNIQUE,CANONICAL,CIRCULAR,PERFECT_EXT,UNAMBIGUOUS_BP
16	70261043	70262524	5circ_001147	9	-	3	9	40	40	T02	9	0	0	1	GTAG	NA	ANCHOR_UNIQUE,CANONICAL,CIRCULAR,PERFECT_EXT,UNAMBIGUOUS_BP
16	38209	43975	5circ_001148	4	-	3	4	5	40	T02	4	0	0	1	GTAG	NA	ANCHOR_UNIQUE,CANONICAL,CIRCULAR,PERFECT_EXT,UNAMBIGUOUS_BP
5	95755395	95763620	5circ_001150	139	+	41	134	40	40	T02	139	0	0	1	GTAG	NA	ANCHOR_UNIQUE,CANONICAL,CIRCULAR,PERFECT_EXT,UNAMBIGUOUS_BP
3	44794216	44794426	5circ_001151	4	+	2	4	5	40	T02	4	0	0	1	GTAG	NA	ANCHOR_UNIQUE,CANONICAL,CIRCULAR,PERFECT_EXT,UNAMBIGUOUS_BP
5	169998625	169999048	5circ_001152	4	-	2	4	40	40	T02	4	2	0	1	GTAG	NA	ANCHOR_UNIQUE,CANONICAL,CIRCULAR,OK_EXT,UNAMBIGUOUS_BP
17	1636708	1637062	5circ_001153	59	-	18	58	40	40	T02	59	0	0	1	GTAG	NA	ANCHOR_UNIQUE,CANONICAL,CIRCULAR,PERFECT_EXT,UNAMBIGUOUS_BP
11	35204511	35211449	5circ_001154	2	+	1	2	5	40	T02	2	0	0	1	GTAG	NA	ANCHOR_UNIQUE,CANONICAL,CIRCULAR,PERFECT_EXT,UNAMBIGUOUS_BP
11	35201081	35211449	5circ_001155	3	+	2	3	5	40	T02	3	0	0	1	GTAG	NA	ANCHOR_UNIQUE,CANONICAL,CIRCULAR,PERFECT_EXT,UNAMBIGUOUS_BP
11	57690030	57696873	5circ_001156	2	+	2	2	40	40	T02	2	0	0	1	GTAG	NA	ANCHOR_UNIQUE,CANONICAL,CIRCULAR,PERFECT_EXT,UNAMBIGUOUS_BP
16	18841564	18850467	5circ_001157	2	-	2	2	40	35	T02	2	0	0	1	GTAG	NA	ANCHOR_UNIQUE,CANONICAL,CIRCULAR,PERFECT_EXT,UNAMBIGUOUS_BP
17	29666866	29672129	5circ_001159	6	-	1	6	40	40	T02	6	0	0	1	GTAG	NA	ANCHOR_UNIQUE,CANONICAL,CIRCULAR,PERFECT_EXT,UNAMBIGUOUS_BP
8	123015392	123030716	5circ_001160	6	-	4	6	40	40	T02	6	0	0	1	GTAG	NA	ANCHOR_UNIQUE,CANONICAL,CIRCULAR,PERFECT_EXT,UNAMBIGUOUS_BP
17	31509076	31517877	5circ_001161	3	+	1	3	5	5	T02	3	0	0	1	GTAG	NA	ANCHOR_UNIQUE,CANONICAL,CIRCULAR,PERFECT_EXT,UNAMBIGUOUS_BP
3	193657079	193667280	5circ_001162	7	+	2	7	35	40	T02	7	0	0	1	GTAG	NA	ANCHOR_UNIQUE,CANONICAL,CIRCULAR,PERFECT_EXT,UNAMBIGUOUS_BP
19	55341793	55346687	5circ_001164	8	+	2	8	40	40	T02	8	0	0	1	GTAG	NA	ANCHOR_UNIQUE,CANONICAL,CIRCULAR,PERFECT_EXT,UNAMBIGUOUS_BP
5	73063840	73087753	5circ_001166	6	+	1	6	40	5	T02	6	0	0	1	GTAG	NA	ANCHOR_UNIQUE,CANONICAL,CIRCULAR,PERFECT_EXT,UNAMBIGUOUS_BP
14	55175893	55177336	5circ_001167	2	-	1	2	5	5	T02	2	0	0	1	GTAG	NA	ANCHOR_UNIQUE,CANONICAL,CIRCULAR,PERFECT_EXT,UNAMBIGUOUS_BP
2	169544720	169557297	5circ_001169	3	-	1	3	40	5	T02	3	0	0	1	GTAG	NA	ANCHOR_UNIQUE,CANONICAL,CIRCULAR,PERFECT_EXT,UNAMBIGUOUS_BP
19	54969998	54970295	5circ_001170	7	+	2	7	40	5	T02	7	0	0	1	GTAG	NA	ANCHOR_UNIQUE,CANONICAL,CIRCULAR,PERFECT_EXT,UNAMBIGUOUS_BP
3	129857253	129880559	5circ_001171	6	-	4	6	5	40	T02	6	0	0	1	GTAG	NA	ANCHOR_UNIQUE,CANONICAL,CIRCULAR,PERFECT_EXT,UNAMBIGUOUS_BP
9	130099456	130101223	5circ_001172	2	+	1	2	40	5	T02	2	0	0	1	GTAG	NA	ANCHOR_UNIQUE,CANONICAL,CIRCULAR,PERFECT_EXT,UNAMBIGUOUS_BP
22	35193945	35196819	5circ_001173	4	-	4	4	40	40	T02	4	0	0	1	GTAG	NA	ANCHOR_UNIQUE,CANONICAL,CIRCULAR,PERFECT_EXT,UNAMBIGUOUS_BP
15	42634855	42638812	5circ_001175	4	+	1	4	5	40	T02	4	0	0	1	GTAG	NA	ANCHOR_UNIQUE,CANONICAL,CIRCULAR,PERFECT_EXT,UNAMBIGUOUS_BP
19	43652224	43655573	5circ_001176	8	-	2	8	40	40	T02	8	0	0	1	GTAG	NA	ANCHOR_UNIQUE,CANONICAL,CIRCULAR,PERFECT_EXT,UNAMBIGUOUS_BP
20	51516783	51524107	5circ_001177	2	-	2	2	5	40	T02	2	0	0	1	GTAG	NA	ANCHOR_UNIQUE,CANONICAL,CIRCULAR,PERFECT_EXT,UNAMBIGUOUS_BP
14	67685014	67690421	5circ_001178	22	-	8	22	40	40	T02	22	0	0	1	GTAG	NA	ANCHOR_UNIQUE,CANONICAL,CIRCULAR,PERFECT_EXT,UNAMBIGUOUS_BP
20	62279156	62286711	5circ_001179	3	+	1	3	40	40	T02	3	0	0	1	GTAG	NA	ANCHOR_UNIQUE,CANONICAL,CIRCULAR,PERFECT_EXT,UNAMBIGUOUS_BP
2	33186855	33252844	5circ_001180	3	+	1	3	5	5	T02	3	0	0	1	GTAG	NA	ANCHOR_UNIQUE,CANONICAL,CIRCULAR,PERFECT_EXT,UNAMBIGUOUS_BP
10	73806656	73807195	5circ_001181	6	-	2	6	40	40	T02	6	0	0	1	GTAG	NA	ANCHOR_UNIQUE,CANONICAL,CIRCULAR,PERFECT_EXT,UNAMBIGUOUS_BP
10	87508335	87521169	5circ_001182	23	+	7	23	40	40	T02	23	0	0	1	GTAG	NA	ANCHOR_UNIQUE,CANONICAL,CIRCULAR,PERFECT_EXT,UNAMBIGUOUS_BP
16	10969160	11024921	5circ_001183	5	+	1	5	40	40	T02	5	0	0	1	GTAG	NA	ANCHOR_UNIQUE,CANONICAL,CIRCULAR,PERFECT_EXT,UNAMBIGUOUS_BP
16	70466881	70469323	5circ_001184	10	+	2	10	35	40	T02	10	0	0	1	GTAG	NA	ANCHOR_UNIQUE,CANONICAL,CIRCULAR,PERFECT_EXT,UNAMBIGUOUS_BP
3	170145422	170149244	5circ_001185	531	-	89	514	40	40	T02	531	0	0	1	GTAG	NA	ANCHOR_UNIQUE,CANONICAL,CIRCULAR,PERFECT_EXT,UNAMBIGUOUS_BP
13	28174271	28197346	5circ_001186	14	+	4	11	40	40	T02	14	0	0	1	GTAG	NA	ANCHOR_UNIQUE,CANONICAL,CIRCULAR,PERFECT_EXT,UNAMBIGUOUS_BP
18	76937155	76947652	5circ_001187	5	+	1	5	36	40	T02	5	0	0	1	GTAG	NA	ANCHOR_UNIQUE,CANONICAL,CIRCULAR,PERFECT_EXT,UNAMBIGUOUS_BP
5	169681743	169689333	5circ_001189	2	+	1	2	40	40	T02	2	0	0	1	GTAG	NA	ANCHOR_UNIQUE,CANONICAL,CIRCULAR,PERFECT_EXT,UNAMBIGUOUS_BP
14	20395449	20395949	5circ_001190	5	-	2	5	37	40	T02	5	0	0	1	GTAG	NA	ANCHOR_UNIQUE,CANONICAL,CIRCULAR,PERFECT_EXT,UNAMBIGUOUS_BP
17	40053297	40053657	5circ_001191	5	-	3	5	40	40	T02	5	0	0	1	GTAG	NA	ANCHOR_UNIQUE,CANONICAL,CIRCULAR,PERFECT_EXT,UNAMBIGUOUS_BP
4	78826036	78865720	5circ_001192	8	+	3	8	40	40	T02	8	0	0	1	GTAG	NA	ANCHOR_UNIQUE,CANONICAL,CIRCULAR,PERFECT_EXT,UNAMBIGUOUS_BP
8	123077110	123097441	5circ_001193	14	+	4	14	40	40	T02	14	0	0	1	GTAG	NA	ANCHOR_UNIQUE,CANONICAL,CIRCULAR,PERFECT_EXT,UNAMBIGUOUS_BP
18	47865058	47896809	5circ_001195	24	-	7	24	40	40	T02	24	0	0	1	GTAG	NA	ANCHOR_UNIQUE,CANONICAL,CIRCULAR,PERFECT_EXT,UNAMBIGUOUS_BP
12	56604216	56605327	5circ_001196	7	-	3	7	40	40	T02	7	0	0	1	GTAG	NA	ANCHOR_UNIQUE,CANONICAL,CIRCULAR,PERFECT_EXT,UNAMBIGUOUS_BP
10	21713771	21727928	5circ_001197	20	+	11	20	40	40	T02	20	0	0	1	GTAG	NA	ANCHOR_UNIQUE,CANONICAL,CIRCULAR,PERFECT_EXT,UNAMBIGUOUS_BP
8	102833055	102834747	5circ_001198	6	-	2	6	40	40	T02	6	0	0	1	GTAG	NA	ANCHOR_UNIQUE,CANONICAL,CIRCULAR,PERFECT_EXT,UNAMBIGUOUS_BP
12	122477840	122480311	5circ_001199	4	-	1	4	5	40	T02	4	0	0	1	GTAG	NA	ANCHOR_UNIQUE,CANONICAL,CIRCULAR,PERFECT_EXT,UNAMBIGUOUS_BP
3	152414940	152447773	5circ_001200	2	+	1	2	40	40	T02	2	0	0	1	GTAG	NA	ANCHOR_UNIQUE,CANONICAL,CIRCULAR,PERFECT_EXT,UNAMBIGUOUS_BP
21	46643534	46644488	5circ_001202	2	+	1	2	5	40	T02	2	0	0	1	GTAG	NA	ANCHOR_UNIQUE,CANONICAL,CIRCULAR,PERFECT_EXT,UNAMBIGUOUS_BP
10	68431861	68445083	5circ_001204	2	-	2	2	40	40	T02	2	0	0	1	GTAG	NA	ANCHOR_UNIQUE,CANONICAL,CIRCULAR,PERFECT_EXT,UNAMBIGUOUS_BP
19	50398850	50399484	5circ_001205	71	+	27	71	40	40	T02	71	0	0	1	GTAG	NA	ANCHOR_UNIQUE,CANONICAL,CIRCULAR,PERFECT_EXT,UNAMBIGUOUS_BP
11	48159929	48164515	5circ_001207	2	+	1	2	40	5	T02	2	0	0	1	GTAG	NA	ANCHOR_UNIQUE,CANONICAL,CIRCULAR,PERFECT_EXT,UNAMBIGUOUS_BP
5	145817893	145826200	5circ_001208	3	-	1	3	5	40	T02	3	0	0	1	GTAG	NA	ANCHOR_UNIQUE,CANONICAL,CIRCULAR,PERFECT_EXT,UNAMBIGUOUS_BP
3	101398860	101417790	5circ_001209	8	-	3	8	40	40	T02	8	0	0	1	GTAG	NA	ANCHOR_UNIQUE,CANONICAL,CIRCULAR,PERFECT_EXT,UNAMBIGUOUS_BP
2	47151257	47153016	5circ_001210	3	-	1	3	5	40	T02	3	0	0	1	GTAG	NA	ANCHOR_UNIQUE,CANONICAL,CIRCULAR,PERFECT_EXT,UNAMBIGUOUS_BP
9	128508875	128509097	5circ_001211	10	+	2	10	40	40	T02	10	0	0	1	GTAG	NA	ANCHOR_UNIQUE,CANONICAL,CIRCULAR,PERFECT_EXT,UNAMBIGUOUS_BP
16	30728965	30729572	5circ_001212	99	+	39	98	40	40	T02	99	0	0	1	GTAG	NA	ANCHOR_UNIQUE,CANONICAL,CIRCULAR,PERFECT_EXT,UNAMBIGUOUS_BP
11	66543703	66543981	5circ_001213	4	-	2	4	40	40	T02	4	0	0	1	GTAG	NA	ANCHOR_UNIQUE,CANONICAL,CIRCULAR,PERFECT_EXT,UNAMBIGUOUS_BP
6	24830508	24835871	5circ_001214	7	-	2	7	40	40	T02	7	0	0	1	GTAG	NA	ANCHOR_UNIQUE,CANONICAL,CIRCULAR,PERFECT_EXT,UNAMBIGUOUS_BP
16	68025414	68074155	5circ_001215	3	+	1	3	5	40	T02	3	0	0	1	GTAG	NA	ANCHOR_UNIQUE,CANONICAL,CIRCULAR,PERFECT_EXT,UNAMBIGUOUS_BP
17	76492325	76493625	5circ_001216	2	+	1	2	40	4	T02	2	2	0	1	GTAG	NA	ANCHOR_UNIQUE,CANONICAL,CIRCULAR,OK_EXT,UNAMBIGUOUS_BP
1	43619679	43620221	5circ_001217	2	+	1	2	5	40	T02	2	0	0	1	GTAG	NA	ANCHOR_UNIQUE,CANONICAL,CIRCULAR,PERFECT_EXT,UNAMBIGUOUS_BP
18	57551314	57580199	5circ_001218	9	-	2	7	5	40	T02	9	0	0	1	GTAG	NA	ANCHOR_UNIQUE,CANONICAL,CIRCULAR,PERFECT_EXT,UNAMBIGUOUS_BP
22	45689711	45740538	5circ_001220	6	+	3	6	5	40	T02	6	0	0	1	GTAG	NA	ANCHOR_UNIQUE,CANONICAL,CIRCULAR,PERFECT_EXT,UNAMBIGUOUS_BP
8	22498000	22513432	5circ_001221	3	+	1	3	40	40	T02	3	0	0	1	GTAG	NA	ANCHOR_UNIQUE,CANONICAL,CIRCULAR,PERFECT_EXT,UNAMBIGUOUS_BP
4	53399729	53444103	5circ_001222	2	+	1	2	40	40	T02	2	0	0	1	GTAG	NA	ANCHOR_UNIQUE,CANONICAL,CIRCULAR,PERFECT_EXT,UNAMBIGUOUS_BP
16	46668929	46672472	5circ_001223	5	-	2	5	40	40	T02	5	0	0	1	GTAG	NA	ANCHOR_UNIQUE,CANONICAL,CIRCULAR,PERFECT_EXT,UNAMBIGUOUS_BP
11	68537658	68545024	5circ_001224	2	+	2	2	40	40	T02	2	0	0	1	GTAG	NA	ANCHOR_UNIQUE,CANONICAL,CIRCULAR,PERFECT_EXT,UNAMBIGUOUS_BP
14	34758703	34762223	5circ_001226	4	-	1	4	40	40	T02	4	0	0	1	GTAG	NA	ANCHOR_UNIQUE,CANONICAL,CIRCULAR,PERFECT_EXT,UNAMBIGUOUS_BP
8	123372011	123372577	5circ_001229	6	-	2	4	5	40	T02	6	0	0	1	GTAG	NA	ANCHOR_UNIQUE,CANONICAL,CIRCULAR,PERFECT_EXT,UNAMBIGUOUS_BP
6	17624560	17649300	5circ_001231	2	-	1	2	40	40	T02	2	0	0	1	GTAG	NA	ANCHOR_UNIQUE,CANONICAL,CIRCULAR,PERFECT_EXT,UNAMBIGUOUS_BP
6	4891712	4892103	5circ_001232	5	+	2	3	40	5	T02	5	0	0	1	GTAG	NA	ANCHOR_UNIQUE,CANONICAL,CIRCULAR,PERFECT_EXT,UNAMBIGUOUS_BP
20	49264715	49271750	5circ_001233	7	-	2	7	40	5	T02	7	0	0	1	GTAG	NA	ANCHOR_UNIQUE,CANONICAL,CIRCULAR,PERFECT_EXT,UNAMBIGUOUS_BP
14	99257470	99257836	5circ_001234	61	-	21	60	40	40	T02	61	0	0	1	GTAG	NA	ANCHOR_UNIQUE,CANONICAL,CIRCULAR,PERFECT_EXT,UNAMBIGUOUS_BP
19	17839179	17840341	5circ_001235	8	-	3	8	40	40	T02	8	0	0	1	GTAG	NA	ANCHOR_UNIQUE,CANONICAL,CIRCULAR,PERFECT_EXT,UNAMBIGUOUS_BP
7	46127997	46134519	5circ_001236	3	+	1	3	35	5	T02	3	0	0	1	GTAG	NA	ANCHOR_UNIQUE,CANONICAL,CIRCULAR,PERFECT_EXT,UNAMBIGUOUS_BP
12	54516238	54521238	5circ_001237	3	+	1	3	40	5	T02	3	0	0	1	GTAG	NA	ANCHOR_UNIQUE,CANONICAL,CIRCULAR,PERFECT_EXT,UNAMBIGUOUS_BP
5	151452342	151479489	5circ_001238	16	+	10	16	40	40	T02	16	0	0	1	GTAG	NA	ANCHOR_UNIQUE,CANONICAL,CIRCULAR,PERFECT_EXT,UNAMBIGUOUS_BP
1	206595717	206612357	5circ_001239	7	-	1	7	40	35	T02	7	0	0	1	GTAG	NA	ANCHOR_UNIQUE,CANONICAL,CIRCULAR,PERFECT_EXT,UNAMBIGUOUS_BP
5	134666822	134671886	5circ_001241	4	+	1	4	40	40	T02	4	0	0	1	GTAG	NA	ANCHOR_UNIQUE,CANONICAL,CIRCULAR,PERFECT_EXT,UNAMBIGUOUS_BP
12	113260367	113266356	5circ_001242	3	+	1	3	40	40	T02	3	0	0	1	GTAG	NA	ANCHOR_UNIQUE,CANONICAL,CIRCULAR,PERFECT_EXT,UNAMBIGUOUS_BP
2	26263379	26277160	5circ_001245	9	+	7	4	35	5	T02	9	0	0	1	GTAG	NA	ANCHOR_UNIQUE,CANONICAL,CIRCULAR,PERFECT_EXT,UNAMBIGUOUS_BP
19	40583397	40583717	5circ_001246	44	+	12	44	40	40	T02	44	0	0	1	GTAG	NA	ANCHOR_UNIQUE,CANONICAL,CIRCULAR,PERFECT_EXT,UNAMBIGUOUS_BP
10	31355146	31387266	5circ_001247	6	+	3	6	40	40	T02	6	0	0	1	GTAG	NA	ANCHOR_UNIQUE,CANONICAL,CIRCULAR,PERFECT_EXT,UNAMBIGUOUS_BP
22	41117186	41126040	5circ_001248	4	+	1	4	40	40	T02	4	0	0	1	GTAG	NA	ANCHOR_UNIQUE,CANONICAL,CIRCULAR,PERFECT_EXT,UNAMBIGUOUS_BP
11	65436537	65444063	5circ_001249	2	+	2	2	40	40	T02	2	0	0	1	GTAG	NA	ANCHOR_UNIQUE,CANONICAL,CIRCULAR,PERFECT_EXT,UNAMBIGUOUS_BP
12	112229697	112233085	5circ_001250	19	-	9	19	40	40	T02	19	0	0	1	GTAG	NA	ANCHOR_UNIQUE,CANONICAL,CIRCULAR,PERFECT_EXT,UNAMBIGUOUS_BP
13	19865470	19953138	5circ_001251	2	+	1	2	40	5	T02	2	0	0	1	GTAG	NA	ANCHOR_UNIQUE,CANONICAL,CIRCULAR,PERFECT_EXT,UNAMBIGUOUS_BP
1	151303540	151306363	5circ_001252	8	-	3	8	40	40	T02	8	0	0	1	GTAG	NA	ANCHOR_UNIQUE,CANONICAL,CIRCULAR,PERFECT_EXT,UNAMBIGUOUS_BP
5	62526141	62551336	5circ_001253	2	+	1	2	40	40	T02	2	0	0	1	GTAG	NA	ANCHOR_UNIQUE,CANONICAL,CIRCULAR,PERFECT_EXT,UNAMBIGUOUS_BP
9	120518426	120539164	5circ_001254	5	-	1	5	40	40	T02	5	0	0	1	GTAG	NA	ANCHOR_UNIQUE,CANONICAL,CIRCULAR,PERFECT_EXT,UNAMBIGUOUS_BP
1	10347760	10348733	5circ_001255	7	+	1	7	5	40	T02	7	0	0	1	GTAG	NA	ANCHOR_UNIQUE,CANONICAL,CIRCULAR,PERFECT_EXT,UNAMBIGUOUS_BP
11	65435052	65444059	5circ_001256	5	+	2	5	5	40	T02	5	0	0	1	GTAG	NA	ANCHOR_UNIQUE,CANONICAL,CIRCULAR,PERFECT_EXT,UNAMBIGUOUS_BP
6	3283851	3289866	5circ_001257	6	-	3	5	40	40	T02	6	0	0	1	GTAG	NA	ANCHOR_UNIQUE,CANONICAL,CIRCULAR,PERFECT_EXT,UNAMBIGUOUS_BP
3	194459470	194462236	5circ_001258	4	-	2	4	40	5	T02	4	0	0	1	GTAG	NA	ANCHOR_UNIQUE,CANONICAL,CIRCULAR,PERFECT_EXT,UNAMBIGUOUS_BP
10	96949007	96952196	5circ_001259	10	+	3	10	40	40	T02	10	0	0	1	GTAG	NA	ANCHOR_UNIQUE,CANONICAL,CIRCULAR,PERFECT_EXT,UNAMBIGUOUS_BP
11	121543547	121545429	5circ_001260	2	+	1	2	5	40	T02	2	0	0	1	GTAG	NA	ANCHOR_UNIQUE,CANONICAL,CIRCULAR,PERFECT_EXT,UNAMBIGUOUS_BP
10	133267351	133268118	5circ_001262	4	-	2	3	5	40	T02	4	0	0	1	GTAG	NA	ANCHOR_UNIQUE,CANONICAL,CIRCULAR,PERFECT_EXT,UNAMBIGUOUS_BP
11	108200825	108201023	5circ_001263	4	-	2	3	40	5	T02	4	0	0	1	GTAG	NA	ANCHOR_UNIQUE,CANONICAL,CIRCULAR,PERFECT_EXT,UNAMBIGUOUS_BP
18	23507984	23526765	5circ_001264	2	+	1	2	5	40	T02	2	0	0	1	GTAG	NA	ANCHOR_UNIQUE,CANONICAL,CIRCULAR,PERFECT_EXT,UNAMBIGUOUS_BP
2	32098800	32116212	5circ_001266	7	+	1	7	40	5	T02	7	0	0	1	GTAG	NA	ANCHOR_UNIQUE,CANONICAL,CIRCULAR,PERFECT_EXT,UNAMBIGUOUS_BP
20	34072065	34078553	5circ_001267	22	+	4	15	5	5	T02	22	0	0	1	GTAG	NA	ANCHOR_UNIQUE,CANONICAL,CIRCULAR,PERFECT_EXT,UNAMBIGUOUS_BP
16	47497398	47547548	5circ_001268	18	+	7	18	40	40	T02	18	0	0	1	GTAG	NA	ANCHOR_UNIQUE,CANONICAL,CIRCULAR,PERFECT_EXT,UNAMBIGUOUS_BP
15	78281283	78281505	5circ_001269	6	+	2	6	40	40	T02	6	0	0	1	GTAG	NA	ANCHOR_UNIQUE,CANONICAL,CIRCULAR,PERFECT_EXT,UNAMBIGUOUS_BP
15	63732923	63749791	5circ_001270	2	-	1	2	5	40	T02	2	0	0	1	GTAG	NA	ANCHOR_UNIQUE,CANONICAL,CIRCULAR,PERFECT_EXT,UNAMBIGUOUS_BP
1	25446761	25458892	5circ_001271	12	+	5	12	40	40	T02	12	0	0	1	GTAG	NA	ANCHOR_UNIQUE,CANONICAL,CIRCULAR,PERFECT_EXT,UNAMBIGUOUS_BP
10	102109034	102111536	5circ_001272	2	-	1	2	5	40	T02	2	0	0	1	GTAG	NA	ANCHOR_UNIQUE,CANONICAL,CIRCULAR,PERFECT_EXT,UNAMBIGUOUS_BP
11	62581105	62581701	5circ_001273	5	-	1	5	40	40	T02	5	0	0	1	GTAG	NA	ANCHOR_UNIQUE,CANONICAL,CIRCULAR,PERFECT_EXT,UNAMBIGUOUS_BP
12	112239051	112240027	5circ_001274	6	-	2	6	40	40	T02	6	0	0	1	GTAG	NA	ANCHOR_UNIQUE,CANONICAL,CIRCULAR,PERFECT_EXT,UNAMBIGUOUS_BP
11	68759568	68812576	5circ_001275	3	-	2	2	5	40	T02	3	0	0	1	GTAG	NA	ANCHOR_UNIQUE,CANONICAL,CIRCULAR,PERFECT_EXT,UNAMBIGUOUS_BP
3	138570317	138571356	5circ_001276	2	-	1	2	5	5	T02	2	2	0	1	GTAG	NA	ANCHOR_UNIQUE,CANONICAL,CIRCULAR,OK_EXT,UNAMBIGUOUS_BP
21	39293810	39298582	5circ_001277	8	-	2	6	40	35	T02	8	0	0	1	GTAG	NA	ANCHOR_UNIQUE,CANONICAL,CIRCULAR,PERFECT_EXT,UNAMBIGUOUS_BP
1	22863036	22865212	5circ_001279	3	+	1	3	40	40	T02	3	0	0	1	GTAG	NA	ANCHOR_UNIQUE,CANONICAL,CIRCULAR,PERFECT_EXT,UNAMBIGUOUS_BP
17	30904065	30904529	5circ_001280	3	-	1	3	5	40	T02	3	0	0	1	GTAG	NA	ANCHOR_UNIQUE,CANONICAL,CIRCULAR,PERFECT_EXT,UNAMBIGUOUS_BP
16	16007815	16048257	5circ_001281	3	+	2	3	5	5	T02	3	0	0	1	GTAG	NA	ANCHOR_UNIQUE,CANONICAL,CIRCULAR,PERFECT_EXT,UNAMBIGUOUS_BP
1	225152004	225185425	5circ_001282	3	+	1	3	40	40	T02	3	1	0	1	GTAG	NA	ANCHOR_UNIQUE,CANONICAL,CIRCULAR,GOOD_EXT,UNAMBIGUOUS_BP
11	46808030	46809874	5circ_001283	8	-	1	8	5	40	T02	8	0	0	1	GTAG	NA	ANCHOR_UNIQUE,CANONICAL,CIRCULAR,PERFECT_EXT,UNAMBIGUOUS_BP
1	42265114	42278672	5circ_001284	7	-	5	6	40	40	T02	7	0	0	1	GTAG	NA	ANCHOR_UNIQUE,CANONICAL,CIRCULAR,PERFECT_EXT,UNAMBIGUOUS_BP
5	55274613	55281515	5circ_001286	10	-	4	7	5	40	T02	10	0	0	1	GTAG	NA	ANCHOR_UNIQUE,CANONICAL,CIRCULAR,PERFECT_EXT,UNAMBIGUOUS_BP
5	176943334	176951577	5circ_001288	5	-	3	5	40	37	T02	5	1	0	1	GTAG	NA	ANCHOR_UNIQUE,CANONICAL,CIRCULAR,GOOD_EXT,UNAMBIGUOUS_BP
16	68801669	68810341	5circ_001289	4	+	1	4	40	40	T02	4	0	0	1	GTAG	NA	ANCHOR_UNIQUE,CANONICAL,CIRCULAR,PERFECT_EXT,UNAMBIGUOUS_BP
20	41533049	41551360	5circ_001290	2	-	1	2	40	5	T02	2	0	0	1	GTAG	NA	ANCHOR_UNIQUE,CANONICAL,CIRCULAR,PERFECT_EXT,UNAMBIGUOUS_BP
9	5859467	5875063	5circ_001291	6	-	3	6	40	40	T02	6	0	0	1	GTAG	NA	ANCHOR_UNIQUE,CANONICAL,CIRCULAR,PERFECT_EXT,UNAMBIGUOUS_BP
5	55343330	55353269	5circ_001292	2	+	1	2	40	40	T02	2	0	0	1	GTAG	NA	ANCHOR_UNIQUE,CANONICAL,CIRCULAR,PERFECT_EXT,UNAMBIGUOUS_BP
16	71738941	71739341	5circ_001293	7	-	4	7	40	40	T02	7	0	0	1	GTAG	NA	ANCHOR_UNIQUE,CANONICAL,CIRCULAR,PERFECT_EXT,UNAMBIGUOUS_BP
19	17567237	17568713	5circ_001294	3	+	1	3	5	5	T02	3	0	0	1	GTAG	NA	ANCHOR_UNIQUE,CANONICAL,CIRCULAR,PERFECT_EXT,UNAMBIGUOUS_BP
19	7375870	7376619	5circ_001295	3	+	1	3	40	5	T02	3	1	0	1	GTAG	NA	ANCHOR_UNIQUE,CANONICAL,CIRCULAR,GOOD_EXT,UNAMBIGUOUS_BP
9	125301982	125312612	5circ_001296	7	+	2	7	40	40	T02	7	0	0	1	GTAG	NA	ANCHOR_UNIQUE,CANONICAL,CIRCULAR,PERFECT_EXT,UNAMBIGUOUS_BP
19	12715632	12719178	5circ_001297	5	-	1	5	5	40	T02	5	0	0	1	GTAG	NA	ANCHOR_UNIQUE,CANONICAL,CIRCULAR,PERFECT_EXT,UNAMBIGUOUS_BP
16	3675424	3676035	5circ_001298	3	-	1	3	5	40	T02	3	1	0	1	GTAG	NA	ANCHOR_UNIQUE,CANONICAL,CIRCULAR,GOOD_EXT,UNAMBIGUOUS_BP
12	1371832	1444750	5circ_001299	2	+	2	2	40	40	T02	2	0	0	1	GTAG	NA	ANCHOR_UNIQUE,CANONICAL,CIRCULAR,PERFECT_EXT,UNAMBIGUOUS_BP
2	28752037	28799433	5circ_001300	3	+	3	3	40	40	T02	3	0	0	1	GTAG	NA	ANCHOR_UNIQUE,CANONICAL,CIRCULAR,PERFECT_EXT,UNAMBIGUOUS_BP
14	92809352	92837449	5circ_001301	4	+	3	4	5	5	T02	4	0	0	1	GTAG	NA	ANCHOR_UNIQUE,CANONICAL,CIRCULAR,PERFECT_EXT,UNAMBIGUOUS_BP
2	134402987	134428439	5circ_001302	5	+	1	5	40	5	T02	5	0	0	1	GTAG	NA	ANCHOR_UNIQUE,CANONICAL,CIRCULAR,PERFECT_EXT,UNAMBIGUOUS_BP
1	179335505	179343635	5circ_001303	4	+	1	4	40	5	T02	4	1	0	1	GTAG	NA	ANCHOR_UNIQUE,CANONICAL,CIRCULAR,GOOD_EXT,UNAMBIGUOUS_BP
8	127890588	127890998	5circ_001305	11	+	3	11	40	40	T02	11	0	0	1	GTAG	NA	ANCHOR_UNIQUE,CANONICAL,CIRCULAR,PERFECT_EXT,UNAMBIGUOUS_BP
13	32673215	32678929	5circ_001306	4	+	2	4	40	40	T02	4	0	0	1	GTAG	NA	ANCHOR_UNIQUE,CANONICAL,CIRCULAR,PERFECT_EXT,UNAMBIGUOUS_BP
1	20969473	20981227	5circ_001307	15	-	4	15	40	40	T02	15	0	0	1	GTAG	NA	ANCHOR_UNIQUE,CANONICAL,CIRCULAR,PERFECT_EXT,UNAMBIGUOUS_BP
9	114355924	114358167	5circ_001308	9	-	4	9	40	40	T02	9	0	0	1	GTAG	NA	ANCHOR_UNIQUE,CANONICAL,CIRCULAR,PERFECT_EXT,UNAMBIGUOUS_BP
17	60633852	60648082	5circ_001309	3	+	3	3	40	40	T02	3	0	0	1	GTAG	NA	ANCHOR_UNIQUE,CANONICAL,CIRCULAR,PERFECT_EXT,UNAMBIGUOUS_BP
12	51377194	51379884	5circ_001310	6	-	4	6	40	40	T02	6	0	0	1	GTAG	NA	ANCHOR_UNIQUE,CANONICAL,CIRCULAR,PERFECT_EXT,UNAMBIGUOUS_BP
16	56401732	56414344	5circ_001312	4	-	3	4	37	40	T02	4	0	0	1	GTAG	NA	ANCHOR_UNIQUE,CANONICAL,CIRCULAR,PERFECT_EXT,UNAMBIGUOUS_BP
3	187076091	187076254	5circ_001313	2	+	1	2	5	5	T02	2	1	0	1	GTAG	NA	ANCHOR_UNIQUE,CANONICAL,CIRCULAR,GOOD_EXT,UNAMBIGUOUS_BP
12	51053811	51056502	5circ_001314	3	+	1	3	35	5	T02	3	0	2	1	GTAG	NA	ANCHOR_UNIQUE,CANONICAL,CIRCULAR,OK_EXT,UNAMBIGUOUS_BP
9	132278069	132311856	5circ_001315	2	-	2	2	40	40	T02	2	0	0	1	GTAG	NA	ANCHOR_UNIQUE,CANONICAL,CIRCULAR,PERFECT_EXT,UNAMBIGUOUS_BP
18	22989220	22996462	5circ_001316	2	+	1	2	40	5	T02	2	0	0	1	GTAG	NA	ANCHOR_UNIQUE,CANONICAL,CIRCULAR,PERFECT_EXT,UNAMBIGUOUS_BP
15	63727646	63729649	5circ_001317	2	-	2	2	40	40	T02	2	0	0	1	GTAG	NA	ANCHOR_UNIQUE,CANONICAL,CIRCULAR,PERFECT_EXT,UNAMBIGUOUS_BP
19	38130497	38142710	5circ_001318	4	+	1	4	40	40	T02	4	0	0	1	GTAG	NA	ANCHOR_UNIQUE,CANONICAL,CIRCULAR,PERFECT_EXT,UNAMBIGUOUS_BP
1	205097325	205104019	5circ_001319	8	-	3	7	40	40	T02	8	0	0	1	GTAG	NA	ANCHOR_UNIQUE,CANONICAL,CIRCULAR,PERFECT_EXT,UNAMBIGUOUS_BP
11	108186481	108189330	5circ_001320	4	-	2	4	40	40	T02	4	0	0	1	GTAG	NA	ANCHOR_UNIQUE,CANONICAL,CIRCULAR,PERFECT_EXT,UNAMBIGUOUS_BP
22	21788256	21819586	5circ_001321	2	-	1	2	5	40	T02	2	0	0	1	GTAG	NA	ANCHOR_UNIQUE,CANONICAL,CIRCULAR,PERFECT_EXT,UNAMBIGUOUS_BP
16	71655239	71676649	5circ_001322	10	-	2	10	5	5	T02	10	0	0	1	GTAG	NA	ANCHOR_UNIQUE,CANONICAL,CIRCULAR,PERFECT_EXT,UNAMBIGUOUS_BP
18	69873143	69947532	5circ_001323	2	-	1	2	4	5	T02	2	0	0	1	GTAG	NA	ANCHOR_UNIQUE,CANONICAL,CIRCULAR,PERFECT_EXT,UNAMBIGUOUS_BP
5	157339056	157361598	5circ_001324	7	+	3	5	40	40	T02	7	0	0	1	GTAG	NA	ANCHOR_UNIQUE,CANONICAL,CIRCULAR,PERFECT_EXT,UNAMBIGUOUS_BP
4	55999301	55999645	5circ_001325	5	+	3	5	40	5	T02	5	1	0	1	GTAG	NA	ANCHOR_UNIQUE,CANONICAL,CIRCULAR,GOOD_EXT,UNAMBIGUOUS_BP
X	48601783	48602206	5circ_001326	3	+	1	3	40	40	T02	3	0	0	1	GTAG	NA	ANCHOR_UNIQUE,CANONICAL,CIRCULAR,PERFECT_EXT,UNAMBIGUOUS_BP
10	48401611	48410168	5circ_001327	33	+	14	32	40	40	T02	33	0	0	1	GTAG	NA	ANCHOR_UNIQUE,CANONICAL,CIRCULAR,PERFECT_EXT,UNAMBIGUOUS_BP
19	13144576	13145395	5circ_001329	4	-	2	3	40	40	T02	4	0	0	1	GTAG	NA	ANCHOR_UNIQUE,CANONICAL,CIRCULAR,PERFECT_EXT,UNAMBIGUOUS_BP
14	22812899	22815451	5circ_001330	5	-	4	5	40	35	T02	5	0	0	1	GTAG	NA	ANCHOR_UNIQUE,CANONICAL,CIRCULAR,PERFECT_EXT,UNAMBIGUOUS_BP
20	58667489	58671297	5circ_001332	4	+	1	4	40	40	T02	4	0	0	1	GTAG	NA	ANCHOR_UNIQUE,CANONICAL,CIRCULAR,PERFECT_EXT,UNAMBIGUOUS_BP
11	14771936	14789242	5circ_001333	5	+	3	4	37	40	T02	5	1	0	1	GTAG	NA	ANCHOR_UNIQUE,CANONICAL,CIRCULAR,GOOD_EXT,UNAMBIGUOUS_BP
1	21247220	21258839	5circ_001334	15	-	3	15	40	40	T02	15	0	0	1	GTAG	NA	ANCHOR_UNIQUE,CANONICAL,CIRCULAR,PERFECT_EXT,UNAMBIGUOUS_BP
15	41375711	41377304	5circ_001335	5	+	3	5	40	5	T02	5	0	0	1	GTAG	NA	ANCHOR_UNIQUE,CANONICAL,CIRCULAR,PERFECT_EXT,UNAMBIGUOUS_BP
8	13098398	13100770	5circ_001337	3	-	2	3	4	40	T02	3	0	0	1	GTAG	NA	ANCHOR_UNIQUE,CANONICAL,CIRCULAR,PERFECT_EXT,UNAMBIGUOUS_BP
11	128484822	128486146	5circ_001338	5	-	1	5	5	40	T02	5	0	0	1	GTAG	NA	ANCHOR_UNIQUE,CANONICAL,CIRCULAR,PERFECT_EXT,UNAMBIGUOUS_BP
10	124696157	124706887	5circ_001339	8	-	3	8	40	40	T02	8	0	0	1	GTAG	NA	ANCHOR_UNIQUE,CANONICAL,CIRCULAR,PERFECT_EXT,UNAMBIGUOUS_BP
12	111552279	111555919	5circ_001340	2	-	1	2	5	5	T02	2	0	0	1	GTAG	NA	ANCHOR_UNIQUE,CANONICAL,CIRCULAR,PERFECT_EXT,UNAMBIGUOUS_BP
1	55171555	55178129	5circ_001344	2	-	2	2	5	40	T02	2	0	0	1	GTAG	NA	ANCHOR_UNIQUE,CANONICAL,CIRCULAR,PERFECT_EXT,UNAMBIGUOUS_BP
1	100906851	100921841	5circ_001345	15	+	2	15	40	40	T02	15	0	0	1	GTAG	NA	ANCHOR_UNIQUE,CANONICAL,CIRCULAR,PERFECT_EXT,UNAMBIGUOUS_BP
19	2271803	2273160	5circ_001347	5	+	1	5	5	40	T02	5	0	0	1	GTAG	NA	ANCHOR_UNIQUE,CANONICAL,CIRCULAR,PERFECT_EXT,UNAMBIGUOUS_BP
[truncated: 5,528 more rows]

## Sheet: T03.find_circ_Predict
#chrom	start	end	name	n_reads	strand	n_uniq	uniq_bridges	best_qual_left	best_qual_right	tissues	tiss_counts	edits	anchor_overlap	breakpoints	signal	strandmatch	category
[truncated: 10,175 more rows]

[truncated: 6 more sheets: T04.find_circ_Predict, T05.find_circ_Predict, T06.find_circ_Predict, T07.find_circ_Predict, T08.find_circ_Predict, T09.find_circ_Predict]
